# Supplementary material for: The circular RNA landscape in specific peripheral blood mononuclear cells of critically ill patients with sepsis
Source: PubMed Central journal article supplement (PMC7359566; doi:10.1186/s13054-020-03146-4), 2020-07-13
Supplement: 13054_2020_3146_MOESM1_ESM.pdf [file 13054_2020_3146_MOESM1_ESM.pdf]

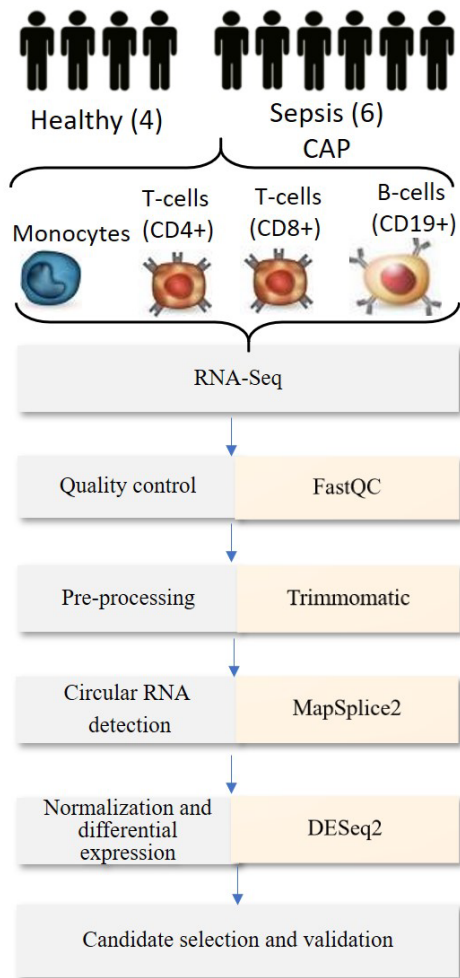

Supplementary Figure 1: Workflow of the analysis of the circular RNAs.
