# Supplementary material for: The circular RNA landscape in specific peripheral blood mononuclear cells of critically ill patients with sepsis
Source: Springer Nature journal article supplement (doi:10.1186/s13054-020-03146-4), 2020-07-13
Supplement: MOESM2 [file 18178192]

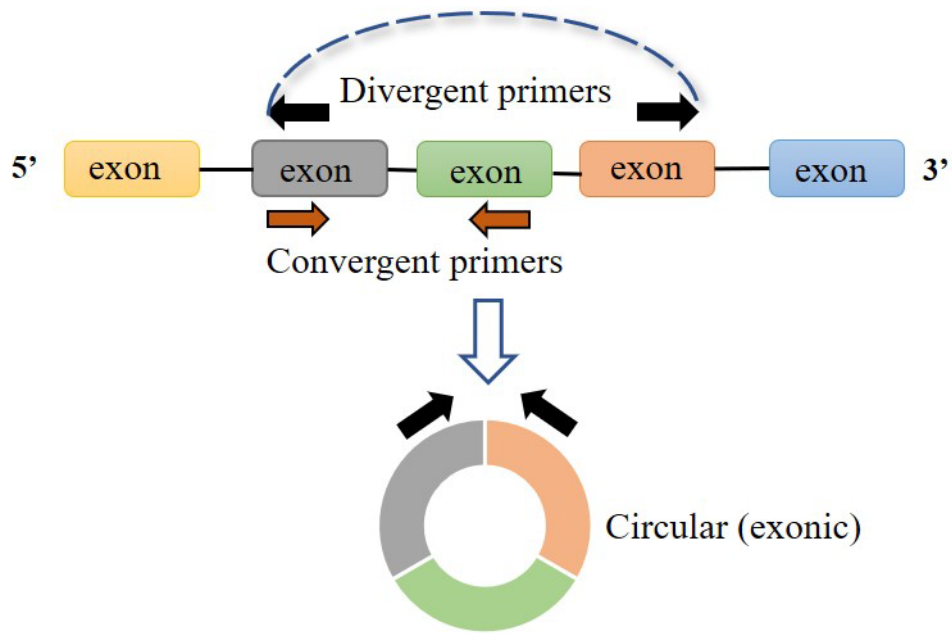

Supplementary Figure 2: Schematic of the divergent primers used for the detection of cicrRNAs.
