# Supplementary material for: The circular RNA landscape in specific peripheral blood mononuclear cells of critically ill patients with sepsis
Source: Springer Nature journal article supplement (doi:10.1186/s13054-020-03146-4), 2020-07-13
Supplement: MOESM4 [file 18178192]

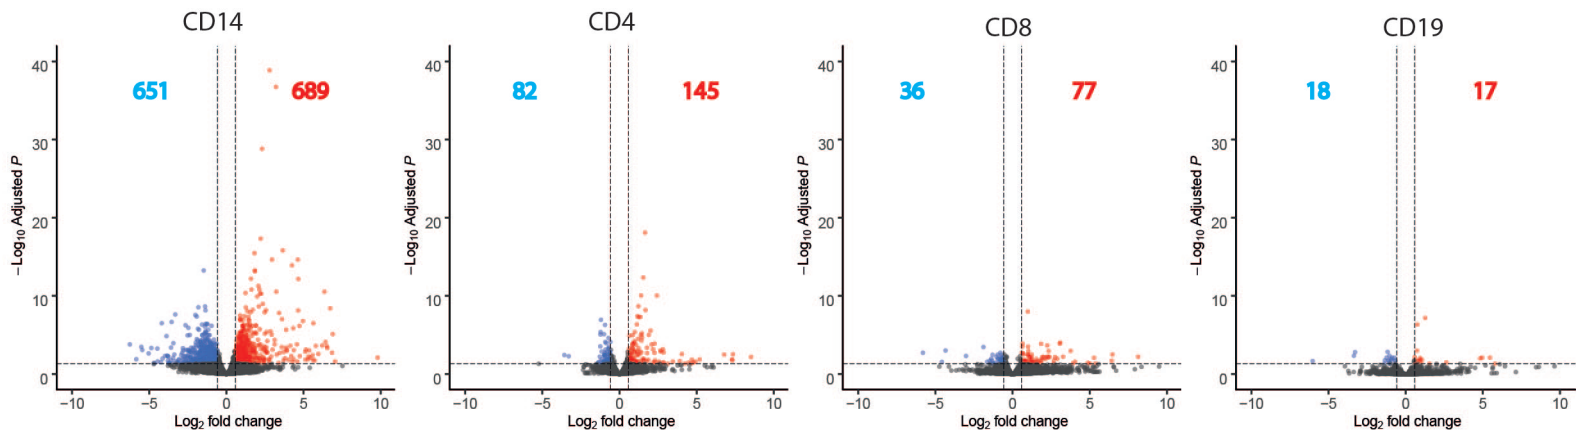

Supplementary Figure 3: Volcano plot (integrating log<sub>2</sub> fold changes and multiple comparison adjusted p-values) representing the transcriptional changes that occur in monocytes, CD4 and CD8 T-cells and B-cells compared to healthy. Numbers in top left and right corners indicate number of genes with significantly differential expression, upregulated (red) or downregulated (blue). Horizontal line represents the multiple-test adjusted significance threshold (p < 0.01) and vertical line represents the log fold change (FC = ±0.58). Grey dots shows the genes that were not significantly overexpressed or underexpressed according to this threshold
