# Supplementary material for: The circular RNA landscape in specific peripheral blood mononuclear cells of critically ill patients with sepsis
Source: Crit Care. 2020 Jul 13;24:423. doi: 10.1186/s13054-020-03146-4 (PMC7359566; doi:10.1186/s13054-020-03146-4)
Supplement: Supplementary file 3 — Additional file 3: Table S1. Table of differentially abundant circRNAs. [file 13054_2020_3146_MOESM3_ESM.xlsx]

## Sheet: CD14
TableS1: CircRNAs detected in Sepsis patients (S34,S35,S36,S46,S47,S48) and healthy volunteers (H40,H41,H42,H47).
Statistics: In red are the upregulated and in blue are the down-regulated circRNAs in sepsis relative to health.
	Normalized Counts										Statistics			MapSplice2 output
CircRNA_ID	H40	H41	H42	H47	S34	S35	S36	S46	S47	S48	log2FoldChange	pvalue	padj	chromosome	Doner_end	Acceptor_start	Strand	flank_case	flank_string	doner_seq	acceptor_seq	Annotated_gene_donor
chr15 : 93014909 - 93000512 : CHD2,	0	0	0	0	8.2786	17.1768	11	19.5063	7.55529	0	5.71531	1.17e-05	0.00858433	chr15	93014909	93000512	+	6	GTAG	AACAAGAGACACTTCAGTAATGCAG	GAGGCTTCCGCTTCTTTAATTTGGC	CHD2,
chr5 : 83522309 - 83519349 : VCAN,	6.24403	0	0	0	15.1774	10.8485	15.2308	11.1465	11.6235	15.7716	2.31264	0.00010143	0.0369204	chr5	83522309	83519349	+	6	GTAG	ATTGAGGTCAGAGAAAATAAGACAG	AAATCGATGGTTGTAGCCTCTTTAG	VCAN,
chr2 : 207976651 - 207977586 : PLEKHM3,	2.67601	0	0	0	6.89883	12.6566	5.07694	11.1465	7.55529	9.01234	3.50574	0.00175985	0.320876	chr2	207976651	207977586	-	5	GTAG	ACTGCTCAGAGTTTCAAATGTGCAG	ATGTTTGGGAATGTCTGCTTGTGTT	PLEKHM3,
chr5 : 83555038 - 83537007 : VCAN,	9.81205	12.2218	15.2317	16.6457	30.3549	8.13639	47.3848	28.7951	29.0588	38.3024	1.18986	0.00202485	0.320876	chr5	83555038	83537007	+	6	GTAG	CCGTTGGACTGATGGCAGCACACTG	ATTACACTCAAATCACTCATTCGAC	VCAN,
chr4 : 139889357 - 139890967 : MAML3,	21.4081	7.85685	18.6165	15.536	4.1393	5.42426	4.23078	2.78662	8.71764	0	-1.83682	0.00274565	0.320876	chr4	139889357	139890967	-	5	GTAG	CGCTGCACTTCCATCCCACGGTCAG	ACTTCCTTTTCACAGTCTCTTGTAG	MAML3,
chr10 : 100926019 - 100923978 : SLF2,	0	0	0	0	4.1393	5.42426	3.38463	2.78662	2.90588	13.5185	4.71786	0.00291315	0.320876	chr10	100926019	100923978	+	6	GTAG	TGAAGGAAATGGAAGACACACAAAG	TCAGGGAATTTATTCTGCTTAGAGC	SLF2,
chr7 : 10990847 - 10982372 : PHF14,	37.4642	30.5544	35.5405	33.2915	15.1774	21.697	16.9231	10.2176	19.1788	28.1636	-0.881426	0.0030643	0.320876	chr7	10990847	10982372	+	6	GTAG	AATTGTGGCATTACAGTCCATGAAG	CTTCCATTACCACTCCCTTCAGAAT	PHF14,
chr4 : 94586444 - 94573351 : PDLIM5,	15.1641	22.6976	6.76962	25.5235	8.2786	8.13639	4.23078	10.2176	5.23058	4.50617	-1.41844	0.00419849	0.384687	chr4	94586444	94573351	+	6	GTAG	AAGCCGATAATACAAAGAAGGCAAA	CTCAGGCTTGGGTGCAGCAGATGCT	PDLIM5,
chr1 : 205616478 - 205623891 : ELK4,	42.8162	58.4899	44.0026	32.1818	13.7977	20.793	25.3847	30.6528	21.5035	42.8086	-0.789539	0.00526422	0.428742	chr1	205616478	205623891	-	5	GTAG	GACATTCAACATGATTGCATTTGAA	TGATAGCACTGTCCATAGCAATGAG	ELK4,
chr5 : 36976402 - 36953618 : NIPBL,	16.0561	12.2218	11.8468	15.536	0	4.52022	4.23078	4.64437	1.74353	10.1389	-1.74154	0.00594803	0.43599	chr5	36976402	36953618	+	6	GTAG	TTCTCAAAAGAAGTTCAAGATAAAG	GTCATTACTTCCCATTTCCCAAACA	NIPBL,
chr20 : 47633636 - 47623911 : NCOA3,	8.92004	9.60281	0	6.6583	0	0	0	0	0	0	-5.21577	0.00739337	0.492667	chr20	47633636	47623911	+	6	GTAG	TCCCAGAAACGTCACTATCAAGAAG	CCGTTTTTCACCACTGCAGGTAAGA	NCOA3,
chr5 : 57246300 - 57251141 : GPBP1,	16.0561	38.4113	15.2317	43.2789	20.6965	9.04043	5.07694	11.1465	18.0165	22.5309	-1.00638	0.0132687	0.792315	chr5	57246300	57251141	-	3	CTGC	CTAGATTTAGGATTCGGAGGATATT	CAAGTTCACTTGAGGCAGAACACAG	GPBP1,
chr14 : 96860735 - 96833467 : VRK1,	7.13603	4.36492	8.46203	14.4263	16.5572	19.889	18.6154	26.9373	4.64941	32.6697	1.2131	0.0141391	0.792315	chr14	96860735	96833467	+	6	GTAG	TTTGAAAGCAAAAACAATAACAAAG	GCTGCTTTTACACGAGGCATTTTCA	VRK1,
chr5 : 83542268 - 83537007 : VCAN,	16.9481	10.4758	30.4633	13.3166	20.6965	26.2173	49.0771	31.5817	20.3412	34.9228	0.841863	0.0151329	0.792315	chr5	83542268	83537007	+	6	GTAG	GAAGGCACGGCAATCTATTTACCAG	ATTACACTCAAATCACTCATTCGAC	VCAN,
chr3 : 3777725 - 3789074 : SUMF1,	0	0	0	0	0	3.61617	4.23078	8.35986	12.2047	0	4.56789	0.0167265	0.80487	chr3	3777725	3789074	-	5	GTAG	TATCTACTGCAAAACCAAGCAAACG	GGCAGTTCTGTTTTCTTCTCAGGCA	SUMF1,
chr10 : 49915917 - 49935142 : PARG,	0	0	0	0	4.1393	0	2.53847	3.71549	7.55529	5.63271	4.28354	0.0235125	0.998587	chr10	49915917	49935142	-	5	GTAG	AGCTTTGATCGATTTCTGGGATAAG	CTGGTAATAGTCTTTTGTTTGAAAA	PARG,
chr12 : 350621 - 366104 : KDM5A,	7.13603	0	5.07722	12.2069	19.3167	9.04043	3.38463	14.862	18.0165	27.037	1.3282	0.0328318	0.998587	chr12	350621	366104	-	5	GTAG	GAGAAAGATTCTGCCAGAAGAAGAG	CAAAACCTCCTTTGCTGGCAACAAT	KDM5A,
chr18 : 13030608 - 12999421 : CEP192,	7.13603	2.61895	0	0	17.937	7.23235	6.76925	7.43099	8.71764	6.75926	1.75699	0.0349921	0.998587	chr18	13030608	12999421	+	6	GTAG	ATGAATGAAGACTTCAGATCTGGTT	TATACCTCGAAAATCTTCCATCTCA	CEP192,
chr1 : 247156406 - 247159813 : ZNF124,	0	0	5.07722	0	5.51907	3.61617	16.077	8.35986	0	9.01234	2.78278	0.0375397	0.998587	chr1	247156406	247159813	-	5	GTAG	AAACCCTATGACTATAAGCAATAAG	CCACATCCTCAAAGGCAACCGAGTT	ZNF124,
chr3 : 122325283 - 122341654 : CSTA,	4.46002	8.72983	5.07722	4.43886	0	0	0	2.78662	0	0	-3.54447	0.0401745	0.998587	chr3	122325283	122341654	-	0	TGAA	GCCTCCAGGTATCATTTTGGCTGAT	AAATATAACCATCAATAAAGAAGCA	CSTA,
chr16 : 20718493 - 20717787 : THUMPD1,	18.7321	31.4274	33.8481	6.6583	0	0	9.30772	6.50212	10.4612	0	-2.33209	0.0471906	0.998587	chr16	20718493	20717787	+	6	GTAG	GCATTGGGTTCACCGTCTGTGGAAG	TTTTTAAGCTTCATCTCCCTATAGC	THUMPD1,
chr4 : 128936655 - 128970468 : SCLT1,	28.5441	32.3004	16.9241	35.5109	19.3167	14.4647	14.3847	11.1465	1.74353	0	-1.49751	0.0474207	0.998587	chr4	128936655	128970468	-	5	GTAG	CAGAAATTAGAATCAATAATCTAAA	AACTCTCAGCTCTAATTTGGCTTGC	SCLT1,
chr2 : 40428473 - 40430304 : SLC8A1,	107.933	102.139	140.47	125.398	115.9	138.319	209.001	191.348	117.398	193.765	0.444974	0.0333864	0.998587	chr2	40428473	40430304	-	5	GTAG	TCGAATTCCAGAATGATGAAATTGT	TGACACTTCCAACTGTCACAACCTA	SLC8A1,
chr17 : 20205912 - 20204333 : SPECC1,	111.501	109.123	115.084	128.727	73.1276	71.4194	99.0003	61.3057	87.7576	113.781	-0.457802	0.0175688	0.80487	chr17	20205912	20204333	+	6	GTAG	ACATGTTTCCAGTCTGCTGGCCAAG	GTCCGTTTAGTTGTTGTAAAGGCCC	SPECC1,
chr17 : 67975958 - 67945409 : BPTF,	37.4642	70.7116	71.081	43.2789	20.6965	26.2173	43.154	32.5106	38.9388	64.2129	-0.548468	0.0491361	0.998587	chr17	67975958	67945409	+	6	GTAG	AATTGAAAGGCTTCAAAGCTAGCAG	TTACTCTGCCTTTGTTCACCTGTAC	BPTF,
chr8 : 668598 - 674047 : ERICH1,	9.81205	0	10.1544	0	0	0	0	0	0	0	-4.86178	0.0511294	0.998587	chr8	668598	674047	-	5	GTAG	CCAGAACATTGCACGATGCCTCCTG	TTTGGCTGGTCATGAGGATCCTGAT	ERICH1,
chr4 : 48383784 - 48369849 : SLAIN2,	29.4361	27.0625	42.3101	61.0344	12.4179	31.6415	17.7693	32.5106	37.1953	21.4043	-0.603557	0.0535716	0.998587	chr4	48383784	48369849	+	6	GTAG	CGTATGCAACCTCAGGCTTCAGCCA	TTTTTTCTTTGGTGATGAATACAGC	SLAIN2,
chr2 : 135639122 - 135631718 : R3HDM1,	10.7041	6.11088	20.3089	11.0972	0	0	10.1539	7.43099	5.23058	0	-1.58812	0.0611297	0.998587	chr2	135639122	135631718	+	6	GTAG	AGCATAGGCAGGCTTTCAAAAACAG	CAATTTCAGCAGCATCATTCTGTCC	R3HDM1,
chr2 : 40428473 - 40430301 : SLC8A1,	17.8401	14.8407	11.8468	13.3166	17.937	28.9294	36.3847	35.2972	9.29882	18.0247	0.728048	0.0622752	0.998587	chr2	40428473	40430301	-	5	GTAG	TCGAATTCCAGAATGATGAAATTGT	ACATGACACTTCCAACTGTCACAAC	SLC8A1,
chr4 : 105237351 - 105233897 : TET2,	35.6802	31.4274	44.0026	44.3886	35.8739	33.4496	20.3078	24.1507	29.64	22.5309	-0.481766	0.0641083	0.998587	chr4	105237351	105233897	+	6	GTAG	GATTTCCCATCTTGCAGATGTGTAG	CACAAGGCTGCCCTCTAGTTGAATT	TET2,
chr13 : 21161790 - 21168399 : SKA3,	4.46002	1.74597	0	0	0	4.52022	0	15.7909	9.87999	15.7716	2.20513	0.0707269	0.998587	chr13	21161790	21168399	-	5	GTAG	ATCATCCAGCAGTTGGAAAAAAGTG	GAGTTAATGGCTTCTTGCTCGTGTA	SKA3,
chr2 : 202556531 - 202555252 : BMPR2,	3.56802	4.36492	11.8468	12.2069	0	0	7.61541	0	0	0	-2.60573	0.0742934	0.998587	chr2	202556531	202555252	+	6	GTAG	GTCCTGGATGGCAGCAGTATACAGA	CACACGCCTATTATGTGACAGGTTG	BMPR2,
chr14 : 30935163 - 30956242 : STRN3,	0	0	0	0	0	0	5.07694	3.71549	5.81176	4.50617	3.98755	0.0745808	0.998587	chr14	30935163	30956242	-	5	GTAG	AGTTCGGGGGATGGCACAGAATGGG	CGCCTTGTAGAAATGCAATCCGGGC	STRN3,
chr10 : 11936545 - 11952249 : UPF2,	0	0	0	0	5.51907	0	6.76925	3.71549	2.90588	0	3.96023	0.0797178	0.998587	chr10	11936545	11952249	-	5	GTAG	AACAAGAAAAGGCAATAAACAGCAG	AACTTTTCTTCCACCAAACATAACG	UPF2,
chr2 : 110649234 - 110661841 : BUB1,	0	0	0	0	4.1393	2.71213	0	9.28874	2.90588	0	3.97118	0.0801242	0.998587	chr2	110649234	110661841	-	5	GTAG	AAGCCCAAGACTGAATTTCAATTGG	TTGGCCCCATACGTGCTGGATTAAC	BUB1,
chr5 : 83572560 - 83537007 : VCAN,	0	0	0	0	0	3.61617	4.23078	6.50212	0	4.50617	3.95797	0.0809586	0.998587	chr5	83572560	83537007	+	6	GTAG	ACCTATACGTGCAAGAAAGGAACAG	ATTACACTCAAATCACTCATTCGAC	VCAN,
chr6 : 85677080 - 85678028 : SNHG5,	0	0	13.5392	14.4263	0	0	0	0	0	0	-5.34972	0.0818305	0.998587	chr6	85677080	85678028	-	1	ATAC	AAAATAAAACATGTAATTTTGGATT	CCAGATGTTCTGGAAGTTTTTTCGT	SNHG5,
chr1 : 111161296 - 111147642 : CEPT1,	11.5961	7.85685	0	7.76801	5.51907	13.5607	17.7693	11.1465	11.6235	23.6574	0.944235	0.0822705	0.998587	chr1	111161296	111147642	+	6	GTAG	TTTCTGGAACATTGCGATTTGGAAT	GTAGGTTTTTGTGGCTGGTGCTTAC	CEPT1,
chr10 : 96952196 - 96944113 : LCOR,	24.9761	13.0947	18.6165	31.072	26.2156	36.1617	23.6924	23.2218	37.7764	42.8086	0.533236	0.0830551	0.998587	chr10	96952196	96944113	+	6	GTAG	GCTGCTCCAGTACTCAAGGGAACGG	GTTCATCCAGACCGACTAAGTGTCC	LCOR,
chr16 : 11721577 - 11736233 : TXNDC11,	3.56802	0	0	0	6.89883	8.13639	9.30772	4.64437	3.48706	0	2.48645	0.0918907	0.998587	chr16	11721577	11736233	-	5	GTAG	TCAGCATTACATTCATTAAAGAAAG	TGGTATTATCACATCTTTTGCTCGA	TXNDC11,
chr16 : 68123121 - 68121987 : NFATC3,	11.5961	6.98387	11.8468	5.54858	0	0	1.69231	6.50212	5.81176	4.50617	-1.49169	0.0925244	0.998587	chr16	68123121	68121987	+	6	GTAG	AGCCTGGCCACACCCCTATATTTCG	GATGCACAATCATCTGGCTCAAGAT	NFATC3,
chr7 : 26193649 - 26196480 : HNRNPA2B1,	0	0	0	0	0	5.42426	4.23078	10.2176	0	0	4.03733	0.0970108	0.998587	chr7	26193649	26196480	-	0	ATGG	CCGGTTATGGAGGAGGAAGAGGAGG	ACGTGAATCCCCAAAGCCAAAGTTG	HNRNPA2B1,
chr18 : 2892486 - 2890561 : EMILIN2,	7.13603	2.61895	0	5.54858	6.89883	12.6566	2.53847	10.2176	12.2047	11.2654	1.21086	0.0970345	0.998587	chr18	2892486	2890561	+	6	GTAG	CTGGTCAAATTTCAGCCATCAGCAA	TCTGAGAATTGGCTGGGTTCATTAT	EMILIN2,
chr20 : 2965202 - 2964272 : PTPRA,	11.5961	6.98387	8.46203	32.1818	0	10.8485	16.9231	2.78662	6.39294	4.50617	-1.06467	0.0995586	0.998587	chr20	2965202	2964272	+	6	GTAG	ACTCCAGAAACTTTCCCTCCTTCAG	GAATGAACCAGGAATCCATGCTTAT	PTPRA,	CPNE1
chr15 : 41699159 - 41696075 : MGA,	8.02804	0	0	7.76801	0	0	0	0	0	0	-4.5369	0.103785	0.998587	chr15	41699159	41696075	+	6	GTAG	GTGATACATCCTGGTCTTCAAGAAG	ATCTTCAAAACTGCTGGCAATAAGA	MGA,
chr3 : 123931102 - 123949132 : CCDC14,	6.24403	3.49193	5.07722	4.43886	0	1.80809	0	0	2.3247	0	-2.68235	0.104086	0.998587	chr3	123931102	123949132	-	5	GTAG	TGACTCGACTAAGAGAATTAACCAG	ATCTGTTTCTTATTATCTGAAGATG	CCDC14,
chr20 : 35653528 - 35659014 : RBM12,CPN	2.67601	0	0	0	8.2786	5.42426	3.38463	3.71549	5.81176	0	2.58382	0.110836	0.998587	chr20	35653528	35659014	-	5	GTAG	CAGTTTAAAAATGAAGATGATGCAC	CAACCAATTAAAACCAACTTTTAGA	RBM12,CPNE1,
chr15 : 41669958 - 41668828 : MGA,	5.35203	2.61895	0	0	12.4179	4.52022	5.9231	15.7909	4.06823	0	1.72504	0.114279	0.998587	chr15	41669958	41668828	+	6	GTAG	AATTGAAGCAAGAGATTTCTGAATG	ACATAGTCACAATGGCCTTCCCATC	MGA,
chr1 : 108699273 - 108699646 : PRPF38B,	0	5.2379	0	9.98744	0	0	0	0	0	0	-4.4825	0.114642	0.998587	chr1	108699273	108699646	-	0	TCTT	ACGCTCTAGTCGCTGGCGTTCTTTC	GACAAAAGAGATTCCAAGAAAGAGA	PRPF38B,
chr5 : 36986301 - 36984676 : NIPBL,	4.46002	6.11088	10.1544	12.2069	4.1393	5.42426	4.23078	2.78662	3.48706	0	-1.26887	0.12005	0.998587	chr5	36986301	36984676	+	6	GTAG	AATAAACCATCAAAGTCAAATAAAG	TGTTTTCTTTTTTTCAAAGGCTTAT	NIPBL,
chr14 : 73103334 - 73105977 : RBM25,	0	11.3488	0	8.87773	0	2.71213	0	0	0	0	-3.39063	0.126102	0.998587	chr14	73103334	73105977	-	0	TTTC	CGTTCCCGCTCCCGTTCTTTCTCCT	CGAGAGAGGGAACGGGAGCGAGAAA	RBM25,
chr19 : 10162667 - 10177367 : DNMT1,	0	0	6.76962	7.76801	0	0	0	0	0	0	-4.40052	0.131726	0.998587	chr19	10162667	10177367	-	5	GTAG	TGATGAAAAAGACGAGGATGAAAAG	ATCCTGGGGCTAGGTGAAGGTTCAG	DNMT1,
chr19 : 53805280 - 53814988 : NLRP12,	0	0	0	0	0	0	0	10.2176	2.90588	4.50617	3.86333	0.131746	0.998587	chr19	53805280	53814988	-	5	GTAG	CCCAGTGCAGGCTGCAGATGATTCA	GAGGACGGGCCACCAGGTGGGGTAT	NLRP12,
chr17 : 47129393 - 47172064 : CDC27,	0	0	0	0	4.1393	5.42426	3.38463	2.78662	0	0	3.69088	0.133374	0.998587	chr17	47129393	47172064	-	5	GTAG	TTTATTTGCAAATGAAAAATATAAG	AAAAACAAGGCTTCTTCTGAGTGTA	CDC27,
chr20 : 49094963 - 49090742 : CSE1L,	0	0	0	0	0	9.04043	5.9231	0	2.3247	0	3.84116	0.135722	0.998587	chr20	49094963	49090742	+	6	GTAG	GTTGTCTACCGCCTGTCCAGGAAGG	TCTGAAAGACACCTAGTAACCCAGG	CSE1L,
chr1 : 145994969 - 145996173 : TXNIP,	0	0	5.07722	0	9.65836	0	9.30772	3.71549	1.74353	6.75926	2.25741	0.138785	0.998587	chr1	145994969	145996173	-	0	TCTG	CATGTTCATTCCTGATGGGCGGGTG	GAGTAACTTCACACACCTCCACTAT	TXNIP,
chr11 : 85996826 - 86003451 : PICALM,	9.81205	31.4274	37.2329	15.536	16.5572	19.889	8.46157	13.9331	22.6659	9.01234	-0.593094	0.143434	0.998587	chr11	85996826	86003451	-	5	GTAG	TCTCAGGTAGCAAGTACATGGGGAG	AAGCATCAAGAAGACTGCTAGGGGC	PICALM,
chr10 : 100926019 - 100923975 : SLF2,	18.7321	23.5705	20.3089	17.7555	33.1144	26.2173	33.8463	37.1549	16.8541	20.2778	0.456679	0.14702	0.998587	chr10	100926019	100923975	+	6	GTAG	TGAAGGAAATGGAAGACACACAAAG	GGGAATTTATTCTGCTTAGAGCCTG	SLF2,
chr14 : 73103342 - 73105983 : RBM25,	0	0	0	0	0	0	0	8.35986	1.74353	6.75926	3.79541	0.147187	0.998587	chr14	73103342	73105983	-	0	TTTT	CCCGTTCTCGTTCCCGCTCCCGTTC	AGGGAACGGGAGCGAGAAAGAGAAA	RBM25,
chr3 : 149921227 - 149846011 : RNF13,	7.13603	2.61895	15.2317	9.98744	4.1393	8.13639	0	0	5.81176	0	-1.49303	0.147956	0.998587	chr3	149921227	149846011	+	6	GTAG	CTTCCTGTACATAAATTCAAGAAAG	GAGCAGCATCTCGTTGTAAAATCAC	RNF13,
chr8 : 132722040 - 132757294 : TMEM71,	0	0	0	0	0	5.42426	2.53847	0	2.3247	4.50617	3.612	0.14879	0.998587	chr8	132722040	132757294	-	5	GTAG	GCTTAATCATTTCTGCATGTGCAAG	TATTCTCTTTCCAACCTGGAAGAAC	TMEM71,
chr12 : 66228370 - 66203711 : IRAK3,	28.5441	30.5544	44.0026	35.5109	44.1525	55.1467	44.8463	32.5106	37.7764	46.1882	0.349944	0.149636	0.998587	chr12	66228370	66203711	+	6	GTAG	CGGTCATCTGTGGCAGTATATCAAG	AGCCAGCTGCTTGAAAGTCTCTCTG	IRAK3,
chr11 : 130260856 - 130261929 : ZBTB44,	3.56802	2.61895	0	9.98744	0	9.04043	5.9231	12.0754	6.97411	22.5309	1.18287	0.150346	0.998587	chr11	130260856	130261929	-	5	GTAG	ATTAGTCCACAGTCTTCCTCTATAG	AGGATGCAAATAAATCAGAAATGTC	ZBTB44,
chr14 : 73103285 - 73105967 : RBM25,	0	4.36492	0	8.87773	0	0	0	0	0	0	-4.28114	0.154614	0.998587	chr14	73103285	73105967	-	0	TCTC	TTTCTCGTTCCCGTTCTCGCCTTTC	AGAGAGAGAGCGAGAGAGGGAACGG	RBM25,
chr14 : 73103258 - 73106039 : RBM25,	5.35203	0	0	7.76801	0	0	0	0	0	0	-4.26822	0.156797	0.998587	chr14	73103258	73106039	-	0	TTAG	GTTCCCTTTCACGCTCCCTCTCTCT	AGAAGATGCATACGAACGAAGAAAA	RBM25,
chr5 : 113004077 - 112985835 : DCP2,	4.46002	0	0	0	0	7.23235	4.23078	3.71549	10.4612	4.50617	2.09341	0.157198	0.998587	chr5	113004077	112985835	+	6	GTAG	AATGTCTGACCTTTTAAAAGGAAAG	GCTGGGAATATGCAAAATAAATCGG	DCP2,
chr1 : 113829592 - 113834439 : PTPN22,	0	0	0	0	13.7977	0	0	0	4.64941	0	3.91302	0.158179	0.998587	chr1	113829592	113834439	-	5	GTAG	TGGAAAAAGTTTCACAAGGAGTAAG	TTGGGAACATTTGGTGAGAATTCTC	PTPN22,
chr9 : 85618983 - 85660973 : AGTPBP1,	0	0	0	0	0	3.61617	0	10.2176	2.3247	0	3.74118	0.159585	0.998587	chr9	85618983	85660973	-	5	GTAG	AAGTCCAACAGTCAGTTTAATTATG	TGCAGCAAGAGTGTCTAAAGCAACC	AGTPBP1,
chr6 : 149379518 - 149378018 : TAB2,	2.67601	7.85685	5.07722	13.3166	5.51907	1.80809	0	3.71549	2.3247	4.50617	-1.32763	0.161203	0.998587	chr6	149379518	149378018	+	6	GTAG	TCTGATGATGCTGCCTACACACAAG	AGCAGGCATCCAGGTTATTATTATT	TAB2,
chr2 : 231460754 - 231461672 : NCL,	8.02804	5.2379	0	4.43886	0	3.61617	0	0	0	0	-2.85751	0.168285	0.998587	chr2	231460754	231461672	-	0	GAAC	GGATGAAGATGAAGAAGAGGATGAT	CATCTTCATCCTCATCCTCGTCCTC	NCL,
chr7 : 77635849 - 77607235 : PTPN12,	0	0	0	0	0	0	7.61541	0	0	10.1389	3.86788	0.169662	0.998587	chr7	77635849	77607235	+	6	GTAG	ACGATCTGAACAAAAAAAGTCTGAA	GGCACCTGTTCTTCCACAGCCTGCA	PTPN12,
chr6 : 82212707 - 82214829 : IBTK,	5.35203	0	6.76962	8.87773	0	0	0	0	4.64941	0	-2.61748	0.172546	0.998587	chr6	82212707	82214829	-	5	GTAG	AACTGAAGCTAAGTCAGAAAAAATG	GGACACAGCTGGAATTTCATAAAGG	IBTK,
chr2 : 64553409 - 64551443 : AFTPH,AC008	0	0	0	3.32915	0	1.80809	3.38463	8.35986	1.16235	10.1389	2.30966	0.173153	0.998587	chr2	64553409	64551443	+	6	GTAG	ACAGGAATCAGCCACTTCAGTTCAG	TTGCTTTCAAATAATTAATTTACAC	AFTPH,AC008074.1,AFTPH,
chr11 : 59210064 - 59210852 : MPEG1,	0	6.11088	0	12.2069	4.1393	0	0	0	0	0	-3.09685	0.173885	0.998587	chr11	59210064	59210852	-	0	ATTT	CACTCTTGGACTTCTGACTGGTGTC	GGGTGCCGTAGATGGCCAAGGTGAT	MPEG1,
chr9 : 111787947 - 111786793 : C9orf84,	0	5.2379	8.46203	13.3166	37.2537	9.94448	11.8462	3.71549	11.6235	12.392	1.10878	0.176657	0.998587	chr9	111787947	111786793	+	6	GTAG	AGATTATGACTCACTAAAGACTCGG	GTTGGCATCTTCTTCTAACAGAAGG	C9orf84,
chr17 : 64212574 - 64214242 : TEX2,	0	0	0	0	5.51907	7.23235	0	2.78662	0	0	3.66968	0.177182	0.998587	chr17	64212574	64214242	-	5	GTAG	TATCAAAGAACCTGAAATACTGAAG	TGCCGGCTTCACAAGGGCTCAGGCT	TEX2,
chr2 : 231460781 - 231463280 : NCL,	5.35203	6.98387	13.5392	0	0	4.52022	0	0	0	4.50617	-2.1106	0.181305	0.998587	chr2	231460781	231463280	-	0	GACT	TCCTGTGAAAGCCAAGAACGTGGCT	CTTCTTCTACCTCCTTTGGAGGAGG	NCL,
chr2 : 190673152 - 190659158 : NAB1,	3.56802	0	8.46203	0	0	0	0	0	0	0	-4.12331	0.182455	0.998587	chr2	190673152	190659158	+	6	GTAG	ATCCCCAAAGAGAATTAAAGTGGAG	AGCCATTACTCTGGATGGGTTTAAC	NAB1,	AC008074.1	AFTPH
chr14 : 73103263 - 73105981 : RBM25,	0	0	0	0	0	5.42426	5.9231	3.71549	0	0	3.63882	0.182948	0.998587	chr14	73103263	73105981	-	0	TCTT	TTCTCGTTCCCTTTCACGCTCCCTC	AGAGGGAACGGGAGCGAGAAAGAGA	RBM25,
chr2 : 210153495 - 210154611 : KANSL1L,	0	0	0	0	0	0	2.53847	3.71549	8.71764	0	3.64323	0.18344	0.998587	chr2	210153495	210154611	-	5	GTAG	ATACCCTTAGAAAAAATGTGGCAGT	ATTCCTGTAGATAAGTATTGGAAAC	KANSL1L,
chr4 : 73090667 - 73092300 : ANKRD17,	27.6521	27.0625	30.4633	26.6332	35.8739	22.6011	17.7693	18.5775	20.3412	13.5185	-0.398995	0.186644	0.998587	chr4	73090667	73092300	-	5	GTAG	CAGAGACCTGCTCCAAGTCCCTCAG	TTGTCTTGTTGATTCAGTGCCACCC	ANKRD17,
chr2 : 231460763 - 231461708 : NCL,	5.35203	6.11088	0	0	0	0	0	0	0	0	-4.08051	0.187175	0.998587	chr2	231460763	231461708	-	0	GAAG	CGTGGCTGAGGATGAAGATGAAGAA	CATCCTCCTCACTGTCATCATCCTC	NCL,
chr14 : 73103345 - 73106049 : RBM25,	3.56802	7.85685	0	0	0	0	0	0	0	0	-4.07589	0.187689	0.998587	chr14	73103345	73106049	-	0	TTTT	TATCCCGTTCTCGTTCCCGCTCCCG	TACGAACGAAGAAAACTTGAAAGAA	RBM25,
chr8 : 132844318 - 132836540 : PHF20L1,	3.56802	4.36492	0	4.43886	0	0	0	0	1.16235	0	-3.2809	0.190794	0.998587	chr8	132844318	132836540	+	6	GTAG	GACCTAATAGAAAAAGAAGTCGATG	TCTAGGAAGTCTACATCTGATAAGT	PHF20L1,
chr11 : 10025812 - 10026449 : SBF2,	0	0	6.76962	4.43886	0	0	0	0	0	0	-4.01981	0.194023	0.998587	chr11	10025812	10026449	-	3	CTGC	TTTAGGGCAGGTGTTCGAGACCAGC	ATGAATCTACTAAATTTACTTCCAG	SBF2,
chr11 : 68564432 - 68551121 : PPP6R3,	5.35203	0	0	5.54858	0	0	0	0	0	0	-4.00246	0.196015	0.998587	chr11	68564432	68551121	+	6	GTAG	TGAACTCCTGCTGGAGCCACCCAAG	GGATAATTTTCTCCTCATTTAACCA	PPP6R3,
chr1 : 96785254 - 96769703 : PTBP2,	3.56802	4.36492	6.76962	8.87773	15.1774	8.13639	5.07694	10.2176	16.8541	4.50617	0.798717	0.198384	0.998587	chr1	96785254	96769703	+	6	GTAG	TTTGCCAAGGAGACATCCCTCTTAG	AATTTTTTACTATCATTACCATTGG	PTBP2,
chr14 : 73198129 - 73147795 : PSEN1,	0	0	0	0	0	6.3283	2.53847	5.57324	0	0	3.57669	0.198757	0.998587	chr14	73198129	73147795	+	6	GTAG	CTTTTTCCAGCTCTCATTTACTCCT	TCACTTGCAGGCTCCCAGATTAGGT	PSEN1,
chr9 : 33986760 - 34017189 : UBAP2,	2.67601	3.49193	0	0	5.51907	10.8485	2.53847	9.28874	3.48706	0	1.68042	0.200436	0.998587	chr9	33986760	34017189	-	5	GTAG	CGTGGCAAGCGAGCCCGGGGTAGAG	ATAATGTATGTACAAAATAGAAAAT	UBAP2,
chr1 : 155438327 - 155459898 : ASH1L,	24.0841	9.60281	5.07722	4.43886	20.6965	22.6011	11.8462	21.3641	13.367	12.392	0.588008	0.204233	0.998587	chr1	155438327	155459898	-	5	GTAG	AAGAAGAGCAAGAGAATAATAAAAG	GGTTTATCAGAGGTTGGCTGGGAGC	ASH1L,
chr11 : 46076754 - 46092223 : PHF21A,	2.67601	0	0	0	0	0	5.07694	5.57324	2.90588	9.01234	2.36572	0.205886	0.998587	chr11	46076754	46092223	-	5	GTAG	AATCACAGCTTTGAGTGAGAAACAG	GGCTCTCCTTCAGCTCTCTAGCCCC	PHF21A,
chr10 : 1096246 - 1072116 : WDR37,	8.92004	13.9677	0	4.43886	0	18.9849	19.4616	19.5063	9.87999	25.9105	1.1533	0.207138	0.998587	chr10	1096246	1072116	+	6	GTAG	ACCCCAGCCTGTTGCTGACACTAGT	GTGTCCTGGTCACTCCTGCAATAAG	WDR37,
chr3 : 155829688 - 155834041 : SLC33A1,	0	4.36492	10.1544	3.32915	0	0	4.23078	0	0	0	-2.60852	0.209287	0.998587	chr3	155829688	155834041	-	5	GTAG	TTGTCGAACACCTGATGCTGTTGAG	CAGCATCTGCTGCTGAAAAACCAAT	SLC33A1,
chr7 : 26193633 - 26196443 : HNRNPA2B1,	0	0	0	0	6.89883	0	2.53847	4.64437	0	0	3.52329	0.211769	0.998587	chr7	26193633	26196443	-	0	CCGA	AAGAGGAGGATATGGTGGTGGAGGA	TACTTCCTGGTCCTGGTCCGAAATT	HNRNPA2B1,
chr8 : 98526742 - 98596169 : STK3,	3.56802	6.11088	0	0	0	0	0	0	0	0	-3.83869	0.215564	0.998587	chr8	98526742	98596169	-	5	GTAG	TCCTCAAGATGGAGACTTTGACTTT	GATTTGTGGGAATCATAAAAATAGC	STK3,
chr13 : 45975283 - 45980004 : ZC3H13,	0	0	0	0	0	0	0	13.0042	2.3247	0	3.66375	0.22235	0.998587	chr13	45975283	45980004	-	5	GTAG	ATGGACATGATGAAAGAAAATCAAA	TGAGAACCTCTTGAGCCTCGACTTC	ZC3H13,
chr9 : 128515639 - 128508876 : GLE1,	0	0	0	0	0	0	0	8.35986	0	6.75926	3.63539	0.228375	0.998587	chr9	128515639	128508876	+	6	GTAG	ACTGGTACACAGAATGAAAGGAACA	GAGACATACATTCTTCTAAAACATC	GLE1,
chr11 : 18502486 - 18519603 : TSG101,	0	3.49193	0	5.54858	0	0	0	0	0	0	-3.7329	0.228925	0.998587	chr11	18502486	18519603	-	5	GTAG	TCTCAGCCTCCTGTGACCACTGTTG	GTACAGTTAGGTCTCTGTATTTGTA	TSG101,
chr20 : 56381433 - 56386533 : AURKA,	2.67601	5.2379	0	9.98744	5.51907	0	0	0	0	0	-2.42727	0.230479	0.998587	chr20	56381433	56386533	-	5	GTAG	GTTTGATGAGCAGAGAACTGCTACT	TTGGACCTCCAACTGGAGCTGTAGC	AURKA,
chr2 : 112332282 - 112299849 : ZC3H6,	6.24403	6.11088	5.07722	0	4.1393	0	0	0	1.74353	0	-2.21043	0.230788	0.998587	chr2	112332282	112299849	+	6	GTAG	CAGGCGGACGTTCCCAGGAGTTCTG	ACCATCTTCTAATTCGCCATCTTCT	ZC3H6,
chr18 : 9239556 - 9182382 : ANKRD12,	4.46002	4.36492	0	0	0	0	0	0	0	0	-3.70659	0.232339	0.998587	chr18	9239556	9182382	+	6	GTAG	TCAAGGAATGATACAAAAATCATCA	TTTTATCAGTCTTCTCATCCTGGAT	ANKRD12,
chr1 : 117414831 - 117402186 : MAN1A2,	19.6241	17.4597	5.07722	7.76801	12.4179	4.52022	9.30772	7.43099	0	0	-1.19052	0.234488	0.998587	chr1	117414831	117402186	+	6	GTAG	TGAAGACAACCTTGATTTCAGTGTG	ATTTCTCAGACGTTCTTCCTCTTCC	MAN1A2,
chr21 : 29329693 - 29321221 : BACH1,	1.78401	5.2379	15.2317	6.6583	8.2786	7.23235	10.1539	11.1465	11.0423	16.8981	0.681745	0.237878	0.998587	chr21	29329693	29321221	+	6	GTAG	TCTTGAATCAGAAATTGAGAAGCTG	AAGCATGCTTCTAATTATCATCAAC	BACH1,
chr1 : 153373714 - 153375598 : S100A12,	0	0	0	0	0	0	0	4.64437	9.87999	0	3.5972	0.238557	0.998587	chr1	153373714	153375598	-	0	AACA	TAAGAGTTAATAAACACACTCACGA	AGCTACAGCAAAAAGCCAGCAGTGG	S100A12,
chr16 : 68191775 - 68190768 : NFATC3,	0	3.49193	0	0	0	4.52022	6.76925	6.50212	5.81176	0	2.09297	0.239473	0.998587	chr16	68191775	68190768	+	6	GTAG	CTGCAGGACATCACTTTAGATGATG	TCTCTGTGTTCTTGCTTCATCAAAA	NFATC3,
chr6 : 13632370 - 13644729 : RANBP9,	14.2721	13.9677	0	14.4263	17.937	13.5607	13.5385	17.6486	25.5717	9.01234	0.543914	0.241896	0.998587	chr6	13632370	13644729	-	5	GTAG	CACTGCAAACAAAAAAATGTTGAAG	GCCCCACAGTAGGATACAAATTTGG	RANBP9,
chr5 : 87353235 - 87331348 : RASA1,	0	0	0	0	8.2786	6.3283	0	0	0	0	3.57632	0.243069	0.998587	chr5	87353235	87331348	+	6	GTAG	TCTTAAGGAACCTGTACCAATGCAG	TCTGTCAAGTTTTCCGTGATACCAC	RASA1,
chr5 : 168497348 - 168488602 : RARS,	4.46002	0	16.9241	6.6583	0	0	3.38463	7.43099	2.90588	0	-1.55199	0.243636	0.998587	chr5	168497348	168488602	+	6	GTAG	TGGGGATCTTCAGGTCTTTTATAAG	CAGTCAGAGATTTAATCTCTTCTTC	RARS,
chr1 : 12278038 - 12275825 : VPS13D,	0	0	0	0	0	4.52022	3.38463	4.64437	0	0	3.37487	0.243896	0.998587	chr1	12278038	12275825	+	6	GTAG	TTTGAATCTTTGCATAGAGGTCAAG	TCCCTACTTTTCCTCCTGGAGTTAT	VPS13D,
chr4 : 152411303 - 152469988 : FBXW7,	0	0	0	0	5.51907	0	0	0	0	9.01234	3.56585	0.246574	0.998587	chr4	152411303	152469988	-	5	GTAG	CCCATTCTATACAAAAACAACAAAA	AAATCCTGCTGGTGGTTGAGATTCC	FBXW7,
chr5 : 168494650 - 168488602 : RARS,	4.46002	6.11088	11.8468	5.54858	5.51907	0	5.9231	0	2.90588	4.50617	-1.15345	0.246602	0.998587	chr5	168494650	168488602	+	6	GTAG	ACCTGCTCTGGGAGAGAATAAAAAG	CAGTCAGAGATTTAATCTCTTCTTC	RARS,
chr1 : 151118139 - 151088190 : GABPB2,	0	0	0	0	0	0	4.23078	3.71549	0	4.50617	3.35787	0.248023	0.998587	chr1	151118139	151088190	+	6	GTAG	CACCATGGTTGAAGAGGTGGCTGAG	TCTTTCCCAAGTCCACCAAAGACAT	GABPB2,
chr5 : 83493931 - 83482297 : VCAN,	0	0	0	0	0	6.3283	0	0	0	7.8858	3.54568	0.250883	0.998587	chr5	83493931	83482297	+	6	GTAG	TATTGTTATGTGGATCATCTGGATG	GGTCCCTGGGAAAGATAGATTCATC	VCAN,
chr9 : 112262435 - 112297916 : PTBP3,	3.56802	0	0	4.43886	0	0	0	0	0	0	-3.55896	0.252169	0.998587	chr9	112262435	112297916	-	5	GTAG	TGTTACCCTGGAAGTTCTTCATCAG	AAGAAAGAAGCTCATCAGATCCCCG	PTBP3,
chr1 : 172557794 - 172551512 : SUCO,	8.92004	6.98387	0	3.32915	0	4.52022	0	2.78662	0	0	-1.98985	0.252268	0.998587	chr1	172557794	172551512	+	6	GTAG	TGCTTCAGATAATTTAAAAAATGAG	ACAACATACACGCCAGCTGGGAAGC	SUCO,
chr5 : 132595810 - 132591224 : RAD50,	3.56802	4.36492	0	0	0	0	0	0	0	0	-3.55457	0.252778	0.998587	chr5	132595810	132591224	+	6	GTAG	AAATGCTGGGACTTGTGCCCATGAG	TCTCAGCCTTGCTTAACTCACGTTC	RAD50,
chr7 : 92213195 - 92226682 : KRIT1,	3.56802	4.36492	0	0	0	0	0	0	0	0	-3.55457	0.252778	0.998587	chr7	92213195	92226682	-	5	GTAG	TCATCTCCTCAACATGGAAACTAAG	GCGAGTGGCCTCAACTTTTCCATAC	KRIT1,
chr11 : 77619606 - 77625818 : CLNS1A,	0	0	0	0	0	3.61617	0	0	2.90588	5.63271	3.32649	0.253088	0.998587	chr11	77619606	77625818	-	5	GTAG	TGAAAATGATTTATGCAAGTTTAAG	TCAGCAACAGGTTCTTTTGATTCTT	CLNS1A,
chr4 : 109539667 - 109491327 : SEC24B,	0	0	0	0	0	0	0	0	8.13646	5.63271	3.5136	0.259063	0.998587	chr4	109539667	109491327	+	6	GTAG	TTGCTTCATGTTCAGCAGCAGATTT	CTTGTGGTAGAAGAGCTGTCAACAC	SEC24B,
chr21 : 31700995 - 31705467 : SCAF4,	0	0	0	4.43886	0	6.3283	2.53847	4.64437	6.39294	3.37963	1.82033	0.261339	0.998587	chr21	31700995	31705467	-	5	GTAG	TGAACAGAAAACTGCATTTGACAAG	CTATTTGAACTACATGCTTATAAAG	SCAF4,
chr1 : 243613671 - 243695716 : AKT3,	0	0	0	0	5.51907	0	0	4.64437	1.74353	0	3.28428	0.263146	0.998587	chr1	243613671	243695716	-	5	GTAG	GATGGAATATGTTAATGGGGGCGAG	GGCCTCCAGTTTTTTATATATTCTC	AKT3,
chr1 : 171532961 - 171523221 : PRRC2C,	3.56802	6.98387	0	19.9749	5.51907	2.71213	5.07694	2.78662	5.81176	0	-1.06867	0.263177	0.998587	chr1	171532961	171523221	+	6	GTAG	GAAAGTGAAAACAGCTGTAATAAAG	AGGTGGGCCTCTTCCTCGAAGGCCT	PRRC2C,
chr10 : 11929865 - 11952249 : UPF2,	0	0	0	0	5.51907	2.71213	0	3.71549	0	0	3.28541	0.263907	0.998587	chr10	11929865	11952249	-	5	GTAG	ATCTAATCTTTAAGACTGGTGGGAG	AACTTTTCTTCCACCAAACATAACG	UPF2,
chr1 : 13782831 - 13773078 : PRDM2,	0	0	0	0	0	0	9.30772	0	4.06823	0	3.47416	0.268041	0.998587	chr1	13782831	13773078	+	6	GTAG	CCAAGCAGGAGCTGAAGGACTTCAG	TTATTTTCCTGGGATTTTTTCTTCC	PRDM2,
chr13 : 28261458 - 28256292 : PAN3,	0	0	0	0	0	0	3.38463	0	0	10.1389	3.47201	0.268875	0.998587	chr13	28261458	28256292	+	6	GTAG	CAAATTGATCAAGCAGATATGCCAG	GAAGACCCAGCAGACAACGACATTC	PAN3,
chr3 : 71684572 - 71699708 : EIF4E3,	0	0	0	0	0	0	3.38463	0	0	10.1389	3.47201	0.268875	0.998587	chr3	71684572	71699708	-	5	GTAG	CGAAGCCGATGCTGGTCAATTTAGA	TATTATTGTATACACTCCAAAATAT	EIF4E3,
chr4 : 102722871 - 102730736 : MANBA,	0	0	0	0	0	2.71213	5.07694	3.71549	0	0	3.25062	0.269343	0.998587	chr4	102722871	102730736	-	5	GTAG	ATGCCATGTCAACTTTGTTCGGAAG	TCCCTACAGATAGATGCTTCTTCAA	MANBA,
chr11 : 18291442 - 18292976 : HPS5,	0	0	0	0	5.51907	0	3.38463	2.78662	0	0	3.25507	0.269676	0.998587	chr11	18291442	18292976	-	5	GTAG	GATACTTTTATTGAAGGATTGAAAG	TGGACTAGTTACCTCTTTTTCCTCC	HPS5,
chr6 : 89084643 - 89083753 : PNRC1,	1.78401	6.98387	10.1544	4.43886	0	4.52022	0	0	6.39294	0	-1.59835	0.272315	0.998587	chr6	89084643	89083753	+	6	GTAG	AGTTTAAATCTGTGGCACAATCAAT	ATTTTCCCATCTTTGATTTTAAAAC	PNRC1,
chr1 : 30992390 - 31007102 : PUM1,	0	0	0	0	0	9.04043	0	0	4.06823	0	3.44285	0.272989	0.998587	chr1	30992390	31007102	-	5	GTAG	TTTTGACTACAATTCTCAACAACAG	AAAACTTTTTACCTGGCAAGAGCTG	PUM1,
chr8 : 67132080 - 67103037 : CSPP1,	3.56802	3.49193	0	0	0	0	0	0	0	0	-3.38845	0.274358	0.998587	chr8	67132080	67103037	+	6	GTAG	TTACCAAGAGGCTTTGCAGCAGCAG	ATTCCCTCGTTTGTTCCTGTGCATC	CSPP1,
chr3 : 33400189 - 33425741 : UBP1,	0	0	0	0	0	3.61617	0	0	9.29882	0	3.42993	0.274827	0.998587	chr3	33400189	33425741	-	5	GTAG	ACAAGACTGTTCTCTAATTTTTCAG	GAAAATGGGCAATGCCAAGACATCA	UBP1,
chr15 : 50300789 - 50309798 : GABPB1,	0	0	0	0	0	4.52022	3.38463	0	0	3.37963	3.21729	0.276115	0.998587	chr15	50300789	50309798	-	5	GTAG	TTGTCCAATTCTTCAGAAACTCCAG	TCTTTCCCAAATCTACCAGGGACAT	GABPB1,
chr9 : 33944365 - 33953474 : UBAP2,	2.67601	3.49193	6.76962	0	4.1393	0	0	0	0	0	-2.56814	0.27753	0.998587	chr9	33944365	33953474	-	5	GTAG	GCGGCGGATACCCCCAGCTTCTAAG	CTGGAGCAAGGCTACCAGATCAATG	UBAP2,
chr13 : 27089883 - 27116596 : USP12,	0	0	0	0	5.51907	7.23235	0	0	0	0	3.38347	0.281502	0.998587	chr13	27089883	27116596	-	5	GTAG	GCAGCAAACAGGAAGCACACAAACG	TCTCTAATGCCGAAGCATTGGCGCC	USP12,
chr12 : 66228370 - 66209456 : IRAK3,	0	0	0	0	0	7.23235	0	0	5.23058	0	3.37279	0.283051	0.998587	chr12	66228370	66209456	+	6	GTAG	CGGTCATCTGTGGCAGTATATCAAG	TTCTCTGAAGGACTCAACACTGCTC	IRAK3,
chr2 : 159752571 - 159729009 : MARCH7,	3.56802	0	0	0	0	0	11	6.50212	0	6.75926	2.10804	0.285517	0.998587	chr2	159752571	159729009	+	6	GTAG	TGGTTACAGGCCAAAATTAACTCTG	TTAGACTCCATTCTTAAAGATTTTT	MARCH7,
chr7 : 66241270 - 66240325 : TPST1,	0	0	0	0	0	0	0	9.28874	2.90588	0	3.33643	0.288372	0.998587	chr7	66241270	66240325	+	6	GTAG	AAGCTGGGGGAGTGTCTCTGTCAAA	TCTACTTCAGAAAGATAACCAACAT	TPST1,
chr3 : 122325274 - 122341645 : CSTA,	0	0	0	0	6.89883	5.42426	0	0	0	0	3.32976	0.289355	0.998587	chr3	122325274	122341645	-	0	GCTT	TATCATTTTGGCTGATTGCTTCTTT	CTTGCTGATAAATATAACCATCAAT	CSTA,
chr18 : 76871825 - 76849526 : ZNF236,	0	0	0	0	0	0	6.76925	0	5.23058	0	3.32118	0.290623	0.998587	chr18	76871825	76849526	+	6	GTAG	ACGCGACACATTAGGATACACACAG	TCCGCATTCAATGTTAAAACTCCAT	ZNF236,
chr1 : 158846003 - 158843960 : MNDA,	0	0	0	0	5.51907	0	0	0	0	6.75926	3.31957	0.290862	0.998587	chr1	158846003	158843960	+	6	GTAG	GTATGGGTTGTTTATGTTACAAAAG	AGTCTTTTCTTTGTTTGGAGTTTTT	MNDA,
chr6 : 35619096 - 35646850 : FKBP5,	0	0	0	0	0	0	0	6.50212	0	5.63271	3.31745	0.291176	0.998587	chr6	35619096	35646850	-	5	GTAG	CCAAACGAAGGAGCAACAGTAGAAA	CTCCAAAGTGCTAGTCAGCAAACAC	FKBP5,
chr16 : 68126610 - 68121987 : NFATC3,	17.8401	7.85685	10.1544	13.3166	9.65836	14.4647	3.38463	6.50212	12.7859	0	-0.642291	0.291808	0.998587	chr16	68126610	68121987	+	6	GTAG	TACTGGGGGACATCCTGTTGTGAAG	GATGCACAATCATCTGGCTCAAGAT	NFATC3,
chr12 : 54292229 - 54293381 : NFE2,	0	0	0	0	0	0	3.38463	8.35986	0	0	3.27824	0.297027	0.998587	chr12	54292229	54293381	-	5	GTAG	GCAACAAGTGTTTGGAAGTTCCAAG	ATGGCTCACTTGGAGCATTCAGACC	NFE2,
chr2 : 224873996 - 224876221 : DOCK10,	0	0	0	0	0	0	5.9231	0	0	5.63271	3.24944	0.301373	0.998587	chr2	224873996	224876221	-	5	GTAG	GAATGAAAATGATCCGATAACGAAT	AGGCATATTTTCTTAGTCTGTTATT	DOCK10,
chr1 : 117442325 - 117402186 : MAN1A2,	59.7643	30.5544	47.3874	19.9749	41.393	28.9294	27.9232	23.2218	41.8447	9.01234	-0.450518	0.301722	0.998587	chr1	117442325	117402186	+	6	GTAG	CTTGGGCAATGGTGAATTTGAAAAG	ATTTCTCAGACGTTCTTCCTCTTCC	MAN1A2,
chrX : 19965044 - 19970298 : CXorf23,	0	0	0	0	0	0	7.61541	3.71549	0	0	3.22894	0.304494	0.998587	chrX	19965044	19970298	-	5	GTAG	TGAAGAAAACAGTAGATACATTCAG	CGTGAGCCACTATCCACTTTTTACA	CXorf23,
chr5 : 131677703 - 131709272 : FNIP1,	0	0	0	0	0	4.52022	0	3.71549	1.74353	0	3.04891	0.305434	0.998587	chr5	131677703	131709272	-	5	GTAG	TATAACCCACTTTGGGCACAACTGG	GGCATGTCCATTGGGTTGCTGTGAA	FNIP1,
chr17 : 61984171 - 61985090 : MED13,	8.02804	0	13.5392	8.87773	5.51907	6.3283	0	0	0	0	-1.96613	0.305565	0.998587	chr17	61984171	61985090	-	5	GTAG	CTTCAATGCCATTCATCAAAGAGGG	CATTTGCTGATTTTTTAGATCCAGG	MED13,
chr20 : 2965202 - 2923207 : PTPRA,	0	0	0	0	4.1393	3.61617	0	0	2.3247	0	3.04844	0.306394	0.998587	chr20	2965202	2923207	+	6	GTAG	ACTCCAGAAACTTTCCCTCCTTCAG	CTTTGTTTTTTTTTAGTTGTGTCAC	PTPRA,
chr17 : 64360140 - 64378117 : PECAM1,	0	0	0	0	0	0.904043	0	0	4.64941	4.50617	3.06075	0.307769	0.998587	chr17	64360140	64378117	-	5	GTAG	GAGGTTCTGAGGGTGAAGGTGATAG	ATGTCAACACTGTTGATTGTGAAAG	PECAM1,
chr1 : 92324375 - 92320683 : RPAP2,	2.67601	2.61895	0	0	0	0	3.38463	0	4.06823	28.1636	2.11044	0.308001	0.998587	chr1	92324375	92320683	+	6	GTAG	CACCAAATCACAAGACTCAGAAGAG	ATCACCTGGTTCACTCCTAATGTTT	RPAP2,
chr14 : 49795791 - 49831361 : NEMF,	2.67601	0	0	0	6.89883	6.3283	6.76925	0	0	0	2.19434	0.308867	0.998587	chr14	49795791	49831361	-	5	GTAG	GCAGCCAATGAAACGAGGACAAAAG	TCTTGGAATAAAATTCATCCACCGC	NEMF,
chr1 : 31915895 - 31919658 : PTP4A2,	13.3801	9.60281	0	14.4263	8.2786	8.13639	16.077	12.0754	21.5035	16.8981	0.517659	0.309253	0.998587	chr1	31915895	31919658	-	5	GTAG	TGAAAAAGAAGGAATCCACGTTCTA	TGCAACGTATATTCCAACGAAAAAC	PTP4A2,
chr1 : 155395459 - 155459898 : ASH1L,	0	2.61895	0	0	5.51907	0	3.38463	2.78662	0	6.75926	2.08304	0.309442	0.998587	chr1	155395459	155459898	-	5	GTAG	TTATTTCCAGCGCCCATTCATGTTG	GGTTTATCAGAGGTTGGCTGGGAGC	ASH1L,
chr1 : 35399576 - 35392212 : ZMYM4,	11.5961	0	8.46203	0	0	0	0	3.71549	1.74353	3.37963	-1.75406	0.310117	0.998587	chr1	35399576	35392212	+	6	GTAG	TGGCTTCCCCCAACCCAGACGAAGA	GCAGCTTGAACCATGGAAATATTTG	ZMYM4,
chr10 : 119049801 - 119051321 : EIF3A,	0	0	0	0	8.2786	0	0	0	2.90588	0	3.18864	0.310691	0.998587	chr10	119049801	119051321	-	5	GTAG	TGGCGATAGTTCCCTTTCTAGAAAG	CACGTTCTAGCTGCATTGTAGTAAT	EIF3A,
chr5 : 36986301 - 36982165 : NIPBL,	49.9522	50.633	44.0026	55.4858	41.393	28.9294	27.9232	40.8704	59.28	54.074	-0.249441	0.31093	0.998587	chr5	36986301	36982165	+	6	GTAG	AATAAACCATCAAAGTCAAATAAAG	ATTAGCTATCAGAATACATATATTC	NIPBL,
chr14 : 45118028 - 45130790 : FKBP3,	0	0	8.46203	8.87773	0	0	0	2.78662	0	3.37963	-2.08107	0.311626	0.998587	chr14	45118028	45130790	-	5	GTAG	GAAAGAAAGGACAGCCTGATGCCAA	TTAATGTTTCCTAATAATTTATGTT	FKBP3,
chr2 : 40428475 - 40430304 : SLC8A1,	0	0	0	0	0	5.42426	0.846157	3.71549	0	0	3.04491	0.311718	0.998587	chr2	40428475	40430304	-	5	GTAG	GCTCGAATTCCAGAATGATGAAATT	TGACACTTCCAACTGTCACAACCTA	SLC8A1,
chr14 : 31127785 - 31133675 : HECTD1,	0	0	0	0	0	0	0	0	6.39294	4.50617	3.17839	0.31228	0.998587	chr14	31127785	31133675	-	5	GTAG	CAGGAAGCAGAATATTCCTTATATG	ATCAAGAGGCCAAGTTGCAGTTGAC	HECTD1,
chr12 : 124398119 - 124422555 : NCOR2,	0	0	0	0	5.51907	0	0	5.57324	0	0	3.17772	0.312383	0.998587	chr12	124398119	124422555	-	5	GTAG	GAAGAAATGGAAACAGCCAAGAAAG	AAAGTTCTTGGGATGCTGCATGAAC	NCOR2,
chr18 : 13117643 - 12999421 : CEP192,	0	0	0	0	5.51907	0	0	5.57324	0	0	3.17772	0.312383	0.998587	chr18	13117643	12999421	+	6	GTAG	TCAAACATTCCAAGTACTCTTTGAG	TATACCTCGAAAATCTTCCATCTCA	CEP192,
chr21 : 29329693 - 29326059 : BACH1,	5.35203	8.72983	5.07722	14.4263	5.51907	5.42426	16.077	20.4352	12.2047	13.5185	0.538492	0.313116	0.998587	chr21	29329693	29326059	+	6	GTAG	TCTTGAATCAGAAATTGAGAAGCTG	AAGGTTCAAATCCTTTAACTGTCAC	BACH1,
chr6 : 82214227 - 82214829 : IBTK,	7.13603	8.72983	6.76962	6.6583	4.1393	5.42426	0	5.57324	6.39294	3.37963	-0.812166	0.313278	0.998587	chr6	82214227	82214829	-	5	GTAG	TCGACTTCAGTAATTTGAGTAGTAG	GGACACAGCTGGAATTTCATAAAGG	IBTK,
chr9 : 85575315 - 85633374 : AGTPBP1,	3.56802	0	0	0	5.51907	4.52022	2.53847	2.78662	0	4.50617	1.78744	0.314329	0.998587	chr9	85575315	85633374	-	5	GTAG	TTGAATCAAGCTGCAAAGTAACTAG	GTTCTTTGGAGATTAAATCATAGTC	AGTPBP1,
chr2 : 48346751 - 48328561 : FOXN2,	0	0	0	0	0	0	8.46157	0	2.3247	0	3.16458	0.314429	0.998587	chr2	48346751	48328561	+	6	GTAG	GAAAGTGGAAAGAAGCCATGGCAAG	TTCTGTTATCCATGGCTTCAACCAA	FOXN2,
chr20 : 41533050 - 41551360 : CHD6,	4.46002	6.11088	6.76962	7.76801	5.51907	0	0	5.57324	1.74353	5.63271	-1.06773	0.314556	0.998587	chr20	41533050	41551360	-	5	GTAG	CCAGGACGAAGTCCAGGAAGGCCAG	ATCTATTGAAGGAAGATATTTATTT	CHD6,
chr4 : 147881932 - 147857553 : ARHGAP10,	0	0	0	0	0	3.61617	0	0	6.97411	0	3.14589	0.317355	0.998587	chr4	147881932	147857553	+	6	GTAG	GTTTTGACATAGAAGCTGCTGATCG	CTTTGTCAAACTTCTTTTTTTCTTC	ARHGAP10,
chr17 : 32175362 - 32173831 : RHOT1,	0	0	0	0	0	2.71213	0	0	2.3247	4.50617	2.97792	0.317932	0.998587	chr17	32175362	32173831	+	6	GTAG	ACAACTTCATCAAGAAATATCTCAG	TGATTTCTTCTGCCCGGGGAGGAAC	RHOT1,
chr14 : 22906195 - 22911403 : RBM23,	0	0	0	0	0	0	0	6.50212	4.06823	0	3.13526	0.319026	0.998587	chr14	22906195	22911403	-	5	GTAG	ACAGGAGTCCTCCACTTGCCACTGG	GTCATCAGATGCCATCCTGTCAGAT	RBM23,
chr1 : 235677091 - 235697272 : LYST,	0	0	0	4.43886	0	4.52022	11	0	2.90588	4.50617	1.79028	0.319284	0.998587	chr1	235677091	235697272	-	5	GTAG	GATATTGCTACTGTGTGTGATTCAG	AGCCTTTTATCCATGACAAAGGACT	LYST,
chr10 : 104018908 - 104008177 : SLK,	16.9481	0	0	0	0	0	0	0	0	4.50617	-2.54941	0.320233	0.998587	chr10	104018908	104008177	+	6	GTAG	TCAGCTACTTAAGCGCCACGAGAAG	CCTGGTCATATTGTCGCTTTTTACT	SLK,
chr1 : 108148279 - 108161293 : SLC25A24,	0	0	0	0	0	3.61617	0	2.78662	2.90588	0	2.95379	0.320562	0.998587	chr1	108148279	108161293	-	5	GTAG	ACAGACTTTTATATATCCAATGGAG	TGTCATTGTCCCATCAACATCAATG	SLC25A24,
chr4 : 40594258 - 40596800 : RBM47,	0	0	0	0	0	0	3.38463	0	6.97411	0	3.11624	0.322031	0.998587	chr4	40594258	40596800	-	5	GTAG	GAGAAGCAGTGTGCAATGGCCTCAG	ACTGCATTCAGGGGAGTGGCCACCC	RBM47,
chr5 : 132892164 - 132897240 : AFF4,	0	0	0	0	0	0	5.07694	0	5.23058	0	3.10576	0.323695	0.998587	chr5	132892164	132897240	-	5	GTAG	TTCCAGTAGCTCCAAGGAGGTTAAG	ATTTGTTTGTTGGCGGGGGTTCAGG	AFF4,
chr3 : 47622207 - 47638780 : SMARCC1,	5.35203	0	0	6.6583	0	0	0	0	2.3247	0	-2.71715	0.32379	0.998587	chr3	47622207	47638780	-	5	GTAG	TATCATGGACAGAGAGAAAGAAGCT	TCCATTTTTTCCTCTTCAGCTCCTT	SMARCC1,
chr1 : 108698798 - 108699507 : PRPF38B,	0	0	0	0	0	0	3.38463	2.78662	2.90588	0	2.92023	0.325657	0.998587	chr1	108698798	108699507	-	0	ATTC	ACGTCTGCGTTCAACATGTCTGTCT	TGACTATGATAAGGAAAGAGGAAAT	PRPF38B,
chr11 : 85974708 - 85983973 : PICALM,	3.56802	0	0	0	0	0	1.69231	9.28874	2.90588	6.75926	1.87201	0.326087	0.998587	chr11	85974708	85983973	-	5	GTAG	CTTTGGCCCTGTATCAGGAGCACAG	TGTGCAACTGGAGAAGGAGTGAATC	PICALM,
chr5 : 43161931 - 43122039 : ZNF131,	0	0	0	0	0	0	3.38463	4.64437	1.16235	0	2.93113	0.326367	0.998587	chr5	43161931	43122039	+	6	GTAG	AAAGAACATCTTCGAAAACATACAG	CAGCCTCCATGGCCGTCGGGCTGCT	ZNF131,
chr13 : 21167988 - 21168399 : SKA3,	51.7362	37.5383	28.7709	32.1818	40.0132	48.8183	31.3078	54.8035	47.0753	48.4413	0.239113	0.32676	0.998587	chr13	21167988	21168399	-	5	GTAG	TTAAAAATGCGAGGAATAATAAAAG	GAGTTAATGGCTTCTTGCTCGTGTA	SKA3,
chr5 : 83542268 - 83519349 : VCAN,	0	0	0	0	6.89883	0	0	0	3.48706	0	3.08558	0.326914	0.998587	chr5	83542268	83519349	+	6	GTAG	GAAGGCACGGCAATCTATTTACCAG	AAATCGATGGTTGTAGCCTCTTTAG	VCAN,
chr15 : 68146700 - 68141946 : PIAS1,	0	0	0	0	0	3.61617	0	0	6.39294	0	3.06506	0.330208	0.998587	chr15	68146700	68141946	+	6	GTAG	TTCTTGGACTGCAGAAATTGGAAGA	CGAAAGCGCTGACTGTTGTCTGATG	PIAS1,
chr1 : 161215303 - 161219219 : FCER1G,	0	0	0	0	0	3.61617	0	6.50212	0	0	3.06254	0.330615	0.998587	chr1	161215303	161219219	-	0	GTGG	AATCATCTTGGGCTGGAGATCGGCC	CAGCTAAAATATGGGAAGGGAGAAC	FCER1G,
chr10 : 119057022 - 119059356 : EIF3A,	0	0	0	0	0	0	0	6.50212	3.48706	0	3.05334	0.3321	0.998587	chr10	119057022	119059356	-	0	CATC	TTTCAGGACCTTGAGGAATTGGATC	TTCTCGAGTAGCATAATTCAAATCA	EIF3A,
chr18 : 76881512 - 76849526 : ZNF236,	5.35203	5.2379	0	0	0	0	0	0	1.74353	0	-2.78022	0.333733	0.998587	chr18	76881512	76849526	+	6	GTAG	AAGAAGAAGTCACCGTTTCTACCTG	TCCGCATTCAATGTTAAAACTCCAT	ZNF236,
chr6 : 18236452 - 18258405 : DEK,	15.1641	9.60281	10.1544	0	11.0381	2.71213	3.38463	6.50212	6.39294	0	-0.821159	0.335411	0.998587	chr6	18236452	18258405	-	5	GTAG	CACAATGAAACAGATTTGCAAAAAG	TTGCCTTCCACGATGAGACTCTTTT	DEK,
chr11 : 93679552 - 93666682 : CEP295,	8.92004	0	13.5392	0	0	0	0	0	0	4.50617	-2.9261	0.335426	0.998587	chr11	93679552	93666682	+	6	GTAG	AATGAAGAAGATCCATTTGGCTCAA	TCTGTGTACTTTATGTATGACAGTT	CEP295,
chr7 : 11013906 - 10982372 : PHF14,	0	0	0	0	5.51907	4.52022	0	0	0	0	3.0314	0.335659	0.998587	chr7	11013906	10982372	+	6	GTAG	TTTTCAAGGAGACAGATGCTGGAAG	CTTCCATTACCACTCCCTTCAGAAT	PHF14,
chr1 : 92336427 - 92320599 : RPAP2,	0	0	0	0	0	0	3.38463	6.50212	0	0	3.03081	0.335755	0.998587	chr1	92336427	92320599	+	6	GTAG	TTAAAAATCTTGTTCGAACTTTCAG	CTTTAGCAGTTGAAAATCAGGATGC	RPAP2,
chr4 : 36228582 - 36229645 : ARAP2,	0	7.85685	0	14.4263	0	0	0	0	0	4.50617	-2.92347	0.335864	0.998587	chr4	36228582	36229645	-	5	GTAG	GGTCAACAAAAGGAGTTTCTGGGAG	CAGTGACTGCTTTACCTGCTTAAGC	ARAP2,
chrX : 1386308 - 1386720 : SLC25A6,	0	0	0	0	0	5.42426	0	0	0	4.50617	3.0286	0.336116	0.998587	chrX	1386308	1386720	-	0	GCGA	ACCTAGAGTCCAGATGCTTGTAGGA	TTGCCCCCCTCATCTCTGAAGATCT	SLC25A6,
chr19 : 10163326 - 10177367 : DNMT1,	0	2.61895	0	3.32915	0	0	6.76925	8.35986	12.2047	0	1.60415	0.337054	0.998587	chr19	10163326	10177367	-	5	GTAG	AGCACAGAAGTCAACCCAAAGATCT	ATCCTGGGGCTAGGTGAAGGTTCAG	DNMT1,
chr4 : 107682015 - 107694006 : PAPSS1,	0	0	0	0	6.89883	0	0	0	2.90588	0	2.99918	0.340931	0.998587	chr4	107682015	107694006	-	5	GTAG	AGTTGTGGAACTTCTACAGGAACGG	GTAGTCTTTCCCGCTCCAGACAAGC	PAPSS1,
chr7 : 158876691 - 158869855 : WDR60,	11.5961	18.3326	0	26.6332	8.2786	0	5.07694	0	15.1106	0	-1.57073	0.342425	0.998587	chr7	158876691	158869855	+	6	GTAG	AGAAAGAAGATACCGAGAAAGAAAG	TCCAGGTATCATCTTTGGTTCTTCT	WDR60,
chr1 : 151423397 - 151430841 : POGZ,	0	0	0	0	0	2.71213	3.38463	0	2.3247	0	2.81288	0.342462	0.998587	chr1	151423397	151430841	-	5	GTAG	GTTCATAGTCCCTATGAATCTACTA	CCTTGCTGGACCAAAGGATTGCCAG	POGZ,
chr15 : 44338317 - 44328685 : CASC4,	6.24403	2.61895	5.07722	5.54858	4.1393	2.71213	5.07694	0	0	0	-1.3165	0.343676	0.998587	chr15	44338317	44328685	+	6	GTAG	GCAAAAGTTGATGATCTTCCCCCTG	TCCTGACGAAGCTCAGCAAGTTGCT	CASC4,
chr12 : 1444750 - 1371833 : ERC1,	7.13603	0	6.76962	16.6457	0	0	0	6.50212	6.39294	0	-1.79626	0.344107	0.998587	chr12	1444750	1371833	+	6	GTAG	GCTGCAGAAGATGACCCGGGGGCAG	AATGGCAGCCAGAAGAGCTTCTTGC	ERC1,
chr2 : 71380565 - 71355719 : ZNF638,	0	3.49193	0	0	0	0	2.53847	8.35986	5.23058	3.37963	1.82453	0.344809	0.998587	chr2	71380565	71355719	+	6	GTAG	GAAATTGTTACTTCAACTTCTGCTG	ATGTATTTTGATGCTGAATCCAATC	ZNF638,
chr2 : 175939552 - 175979825 : KIAA1715,	0	0	0	0	0	0	5.9231	0	3.48706	0	2.97296	0.345261	0.998587	chr2	175939552	175979825	-	5	GTAG	TGGTTGGTGATGGTCCACAAAACAG	TAAACTTACTATTTCTTTCTGTTCT	KIAA1715,
chr10 : 28596041 - 28583399 : WAC,	8.02804	6.98387	44.0026	11.0972	15.1774	17.1768	12.6923	6.50212	12.2047	7.8858	-0.471017	0.345439	0.998587	chr10	28596041	28583399	+	6	GTAG	CCTGCACAGAAAACAGAAAGAAAAG	TTTTCTTGTGGAGAGTAACTGGTCC	WAC,
chr11 : 34984728 - 34957384 : PDHX,	0	0	0	0	0	6.3283	0	0	2.90588	0	2.94132	0.35053	0.998587	chr11	34984728	34957384	+	6	GTAG	CCAGGAAATTGCTGACTCTGTAAAG	GTATATTTTTACTTCCTTCTTCAAC	PDHX,
chr13 : 77205256 - 77243951 : MYCBP2,	4.46002	9.60281	0	0	0	0	4.23078	0	0	0	-2.30618	0.352585	0.998587	chr13	77205256	77243951	-	5	GTAG	AGGAGAATATACTGCTAAAATTAAG	TTCTCCGGAACCACAACCACAGATC	MYCBP2,
chr16 : 53274302 - 53254438 : CHD9,	0	0	0	0	0	4.52022	0	4.64437	0	0	2.92029	0.354063	0.998587	chr16	53274302	53254438	+	6	GTAG	AAGTATTTGATGGAGTTGATGCAAG	CAATTCTGTGGCAACGAGCTTGGGC	CHD9,
chr1 : 88786213 - 88740988 : PKN2,	11.5961	6.98387	0	0	0	2.71213	0	0	0	5.63271	-1.78199	0.354402	0.998587	chr1	88786213	88740988	+	6	GTAG	GAAGTTTACACTGGAACTGGACAGG	AAAACGGAAGACTTCGGGAATCCCC	PKN2,
chr17 : 38850410 - 38853722 : RPL23,	0	0	0	0	0	5.42426	0	3.71549	0	0	2.9166	0.354684	0.998587	chr17	38850410	38853722	-	0	TTTT	AGAAAAGATGGCGTGTTTCTTTATT	CTCGCTTCGACATCTTGAACGCCGG	RPL23,
chr4 : 109473186 - 109462901 : SEC24B,	0	0	0	0	0	0	0	5.57324	3.48706	0	2.91483	0.354982	0.998587	chr4	109473186	109462901	+	6	GTAG	CCATCAGAGCTATTACAACAAAAAG	ACCTGCATTTGATTCTGGGCTGGAC	SEC24B,
chr15 : 49916934 - 49962020 : ATP8B4,	0	0	0	0	0	0	0	0	3.48706	5.63271	2.91349	0.355208	0.998587	chr15	49916934	49962020	-	5	GTAG	CTGTGGAAGTGAGAGAAGAACTCAG	TGATCCAGGTCATCATGTACTTCAC	ATP8B4,
chr5 : 103096541 - 103097781 : GIN1,	0	0	0	0	0	0	0	4.64437	0	4.50617	2.90837	0.356074	0.998587	chr5	103096541	103097781	-	5	GTAG	TACATAAGAGAATCCAGTGAACAAG	ACAATCTGTACAGTTCAATATTGAT	GIN1,
chr7 : 158918869 - 158869855 : WDR60,	0	0	0	0	5.51907	0	0	3.71549	0	0	2.9065	0.356389	0.998587	chr7	158918869	158869855	+	6	GTAG	AACACCAGTCTACCATTCCTTCAAA	TCCAGGTATCATCTTTGGTTCTTCT	WDR60,
chr9 : 79709699 - 79704783 : TLE4,	6.24403	6.98387	0	3.32915	0	2.71213	2.53847	0	2.3247	2.25309	-1.3371	0.358776	0.998587	chr9	79709699	79704783	+	6	GTAG	TGACAGGCATTCCAGGAGGAAAACC	TGGCTGATGGGGATACTGAAGAGCT	TLE4,
chr4 : 13576838 - 13587771 : BOD1L1,	8.02804	0	6.76962	6.6583	0	0	0	4.64437	2.3247	5.63271	-1.34363	0.359359	0.998587	chr4	13576838	13587771	-	5	GTAG	CCACCACCAGATCAGAGGCTCAGAG	GCATATGCCTTTCTTCCTCTTCAAC	BOD1L1,
chr4 : 177353728 - 177353308 : NEIL3,	9.81205	8.72983	27.0785	39.9498	11.0381	9.04043	11.8462	31.5817	16.8541	13.5185	-0.410783	0.359584	0.998587	chr4	177353728	177353308	+	6	GTAG	GCTGCAACCCTGGATATTCTAACAG	TTTTCTTCACTCTTGAGCACTGAAT	NEIL3,
chr2 : 231460682 - 231461693 : NCL,	0	0	0	0	0	0	0	4.64437	4.06823	0	2.86156	0.364041	0.998587	chr2	231460682	231461693	-	0	GAGT	TGAAGATGATGAGGAGGAGGAAGAA	CCTCGTCATCCTCCTCATCCTCCTC	NCL,
chr13 : 19837656 - 19851448 : ZMYM5,	0	0	0	0	5.51907	0	3.38463	0	0	0	2.85521	0.365131	0.998587	chr13	19837656	19851448	-	5	GTAG	TACAATTTGTAGTAAATTAGCAGAG	TAAAAGGTCTTACTCCAGTCTTGGT	ZMYM5,
chr20 : 17947486 - 17957037 : SNX5,	0	0	0	0	0	3.61617	5.07694	0	0	0	2.84858	0.36627	0.998587	chr20	17947486	17957037	-	5	GTAG	CAACTTTCCGAATCTGCAAAAGAAG	TCAGGTCCACAGATACAGATCTCAG	SNX5,
chr1 : 205618957 - 205620838 : ELK4,	0	0	0	0	0	6.3283	0	0	2.3247	0	2.847	0.366543	0.998587	chr1	205618957	205620838	-	5	GTAG	GCAAGGTGCTAACACACTTTTCCAG	GACCATTCACTTTTTTGATGATATT	ELK4,
chr1 : 234604679 - 234605018 : IRF2BP2,	0	0	0	0	0	0	4.23078	0	0	4.50617	2.84472	0.366934	0.998587	chr1	234604679	234605018	-	0	CTTG	TTCAAATCCTAATATTTCAGCTGTG	CAGAGAAACCACAGGTTGCCCTTTC	IRF2BP2,
chr10 : 110985765 - 110964125 : SHOC2,	10.7041	8.72983	8.46203	13.3166	8.2786	6.3283	6.76925	7.43099	6.39294	10.1389	-0.470996	0.37083	0.998587	chr10	110985765	110964125	+	6	GTAG	CTGCTAGACCTCCCAGATACTATAG	GTCAATCAATGATTCATTAGAGTTC	SHOC2,
chr1 : 192811427 - 192812197 : RGS2,	0	0	0	0	0	0	0	5.57324	2.90588	0	2.81872	0.37143	0.998587	chr1	192811427	192812197	-	0	TTAT	TCTTGTATATTCTGGGCAATCAGAG	GCAGTGTCCGTTATGAGTGCCAAAA	RGS2,
chr2 : 227524915 - 227491547 : AGFG1,	0	0	0	0	0	0	0	5.57324	2.90588	0	2.81872	0.37143	0.998587	chr2	227524915	227491547	+	6	GTAG	TTTGCACATTTCAACAGTCATGCAG	CCTGTGTGGTGGATTTAATCCTCGC	AGFG1,
chr2 : 214780560 - 214797117 : BARD1,	0	0	0	0	0	0	0	3.71549	4.64941	0	2.80645	0.373564	0.998587	chr2	214780560	214797117	-	5	GTAG	TTTGCTCCATATTGCTTCTATTAAG	CACAGGCTCTCTCAGAATGTTAGTA	BARD1,
chr9 : 83678441 - 83683066 : UBQLN1,	0	0	0	0	0	3.61617	0	0	4.64941	0	2.7907	0.376312	0.998587	chr9	83678441	83683066	-	5	GTAG	AATGCTGAGTGCTGCACAAGAGCAG	TTGCTGAGCTGAATGATCCTGAGGC	UBQLN1,	AC025263.3
chr7 : 141649333 - 141636960 : AGK,	0	0	6.76962	4.43886	0	0	0	2.78662	0	0	-2.47912	0.376517	0.998587	chr7	141649333	141636960	+	6	GTAG	GCAAAGGAGACTTTATAACTATAGG	TTTTAGAGGCCCAAGATACCAGTAC	AGK,
chr15 : 41377304 - 41356039 : NUSAP1,	2.67601	2.61895	0	0	0	9.04043	0	7.43099	0	7.8858	1.54657	0.37914	0.998587	chr15	41377304	41356039	+	6	GTAG	ACAAACAACCCCATCTCCAGACAAA	GAAGGTACCTTTGAATCTCTGTTAC	NUSAP1,
chr15 : 93009323 - 93000512 : CHD2,	11.5961	19.2056	5.07722	11.0972	13.7977	6.3283	9.30772	8.35986	8.71764	7.8858	-0.437478	0.380795	0.998587	chr15	93009323	93000512	+	6	GTAG	AGGAGCACATCAAACTCTGGAGGAG	GAGGCTTCCGCTTCTTTAATTTGGC	CHD2,
chr12 : 95208843 - 95211267 : FGD6,	8.92004	3.49193	11.8468	4.43886	6.89883	4.52022	5.9231	0	4.06823	4.50617	-0.720077	0.381964	0.998587	chr12	95208843	95211267	-	5	GTAG	TTGGACCCAGACATCAGCATTCCAG	GGGGCCACTGGTGGCTTCTTTATCT	FGD6,
chr12 : 69353856 - 69354193 : LYZ,	0	0	0	0	0	0	3.38463	0	4.64941	0	2.7532	0.382909	0.998587	chr12	69353856	69354193	-	0	TTAC	GATAACCTTTTCTTATATTTTTTAC	TCACAAATGTGAAGTTATGCATGAT	LYZ,
chr1 : 21715389 - 21721764 : USP48,	0	0	0	0	0	0	0	3.71549	0	4.50617	2.75218	0.383089	0.998587	chr1	21715389	21721764	-	5	GTAG	AATGAAGATATTCTGTGTCCACATG	ACACATTCCTTACACAGGGCTTTCA	USP48,
chr9 : 85575315 - 85596449 : AGTPBP1,	7.13603	4.36492	10.1544	2.21943	17.937	11.7526	3.38463	7.43099	5.81176	6.75926	0.576752	0.384853	0.998587	chr9	85575315	85596449	-	5	GTAG	TTGAATCAAGCTGCAAAGTAACTAG	ACCGAATACATGAGTGGTTGCATAC	AGTPBP1,
chr8 : 134600436 - 134610655 : ZFAT,	0	0	0	0	0	3.61617	0	0	0	4.50617	2.73554	0.386039	0.998587	chr8	134600436	134610655	-	5	GTAG	ACATCTTAAAGTTCACACAGCACTG	TCTAGTTCAAGGTCAGACTCGTTAC	ZFAT,
chr19 : 10159658 - 10177367 : DNMT1,	0	4.36492	0	0	17.937	5.42426	0	0	6.97411	0	2.16122	0.386528	0.998587	chr19	10159658	10177367	-	5	GTAG	CCCAGCACAAACTGACCTGCTTCAG	ATCCTGGGGCTAGGTGAAGGTTCAG	DNMT1,
chr12 : 122332987 - 122341697 : CLIP1,	0	0	0	0	0	0	3.38463	4.64437	0	0	2.73215	0.386642	0.998587	chr12	122332987	122341697	-	5	GTAG	ACGATGAATTACGTCTGAAAGAAAG	GTGACTTTTCTGAAACTGTAGCCAC	CLIP1,
chr7 : 26193599 - 26196945 : HNRNPA2B1,	4.46002	0	0	0	4.1393	4.52022	4.23078	8.35986	0	0	1.59442	0.387597	0.998587	chr7	26193599	26196945	-	5	GTAG	GGCAACCAGGGTGGGGGCTACGGAG	CAAAGTAATCTCTAAGGTGATGTTC	HNRNPA2B1,
chr10 : 86470992 - 86473973 : WAPL,	0	0	0	0	0	0	4.23078	3.71549	0	0	2.71819	0.389129	0.998587	chr10	86470992	86473973	-	5	GTAG	CTTGGATGATTCCCAGCACCATCAG	CATTATATACAGCTTTTGTGGGTGA	WAPL,
chr16 : 67612121 - 67610824 : CTCF,	0	0	0	0	0	0	4.23078	3.71549	0	0	2.71819	0.389129	0.998587	chr16	67612121	67610824	+	6	GTAG	AGGAATCACCTTAACACACACACAG	CTGCATCACCTTCCATTTCCCCTGC	CTCF,
chr4 : 55417985 - 55411614 : TMEM165,	0	4.36492	5.07722	0	0	4.52022	5.9231	6.50212	4.06823	7.8858	1.08671	0.391779	0.998587	chr4	55417985	55411614	+	6	GTAG	TACAATTGTATTGGCAGCTAGAGAG	CTGGAGCTGCTGGTGTAAATATTTT	TMEM165,
chr12 : 69801721 - 69800209 : RAB3IP,AC	6.24403	2.61895	10.1544	5.54858	0	0	10.1539	3.71549	3.48706	0	-1.02759	0.391888	0.998587	chr12	69801721	69800209	+	6	GTAG	CTGCAGTTGAATGCGGAGGACCAAA	ATTCATTATACAAGGATAAGTCAGC	RAB3IP,AC025263.3,
chr1 : 154172916 - 154183059 : TPM3,	0	0	0	0	0	3.61617	4.23078	0	0	0	2.70135	0.392144	0.998587	chr1	154172916	154183059	-	4	GCAG	ACGCACAGAGGAACGAGCTGAGCTG	CAGCTCGCTCCTCTGCATCATCTGC	TPM3,
chr3 : 183790980 - 183775915 : YEATS2,	0	0	0	0	0	3.61617	4.23078	0	0	0	2.70135	0.392144	0.998587	chr3	183790980	183775915	+	6	GTAG	ATCTCTGGGAAAGCCACAGTATCCG	CTGGCAGCTGAGCCAGACTGGAGAT	YEATS2,
chr15 : 93002317 - 92996957 : CHD2,	4.46002	0	0	4.43886	0	0	0	0	1.74353	0	-2.5243	0.392283	0.998587	chr15	93002317	92996957	+	6	GTAG	GAAGTCAAAAGATAAGAAAGAGAAG	CCTCTCCTTTTCCCTGGTCCTTTTC	CHD2,
chr1 : 20941491 - 20942330 : EIF4G3,	5.35203	0	10.1544	3.32915	0	0	2.53847	0	1.74353	6.75926	-1.33539	0.393686	0.998587	chr1	20941491	20942330	-	5	GTAG	AATTCAAGAAGGAGCCCTGTCCCAG	ACTGGATCTGGTTTTGGCTTCTCCT	EIF4G3,
chr5 : 142932125 - 142885298 : ARHGAP26,	2.67601	3.49193	0	0	4.1393	14.4647	0	0	2.90588	3.37963	1.35546	0.395702	0.998587	chr5	142932125	142885298	+	6	GTAG	GGAAGCCATGGATGGCCGGGAACCT	CTTTGTCATACTTCTTTTTGGCTTC	ARHGAP26,
chr8 : 67190759 - 67131951 : CSPP1,	0	0	0	0	5.51907	0	0	0	2.3247	0	2.67388	0.39709	0.998587	chr8	67190759	67131951	+	6	GTAG	GAACAAATGGAAAGGACTAGACATT	CAGTTCATTCTGTCCAACCGTATTC	CSPP1,
chr11 : 77672042 - 77693611 : RSF1,	0	0	13.5392	0	0	0	0	0	3.48706	0	-2.40955	0.397612	0.998587	chr11	77672042	77693611	-	5	GTAG	AGACTTTCCAGCTCAGAGAGTGAAG	TATCGCAAGAGTCACACAGAAGAAT	RSF1,
chr1 : 93264901 - 93221609 : CCDC18,	4.46002	0	0	0	13.7977	0	5.9231	10.2176	0	0	2.11522	0.400015	0.998587	chr1	93264901	93221609	+	6	GTAG	TGCAAATGAAGCATTACTTACTAAA	CCTTTTTCTCTAGTTGAGCTTCAAG	CCDC18,
chr10 : 15833630 - 15843272 : FAM188A,	0	0	0	0	0	0	0	4.64437	2.90588	0	2.65448	0.400606	0.998587	chr10	15833630	15843272	-	5	GTAG	GGTGATAGAGAGTGCTCAGGAATGA	ACAGGAGCTTCTTCAAAAGAAATGC	FAM188A,
chr5 : 66054951 - 66043077 : ERBIN,	0	0	0	0	0	0	0	4.64437	2.90588	0	2.65448	0.400606	0.998587	chr5	66054951	66043077	+	6	GTAG	TATTGAAGCCAAAAAGTTAGAAAAG	CTTTCATTATCTGATATAAACATAA	ERBIN,
chr3 : 170128684 - 170149244 : PHC3,	0	0	0	0	0	0	0	0	2.90588	4.50617	2.6158	0.407672	0.998587	chr3	170128684	170149244	-	5	GTAG	ACCAGCACCTGTTGATCCACCAGTG	GTGTAGGAGAAGTGGAGAGGTTGAT	PHC3,
chr3 : 47037666 - 47067118 : SETD2,	7.13603	3.49193	0	6.6583	0	0	0	2.78662	2.3247	5.63271	-1.29055	0.407884	0.998587	chr3	47037666	47067118	-	5	GTAG	AACATATGATGAAAACCCCATGAAG	TTTTCTTTGGAATTCGATATACCTC	SETD2,
chr22 : 41868792 - 41866831 : SREBF2,	3.56802	0	0	0	0	3.61617	0	9.28874	5.81176	0	1.75536	0.411306	0.998587	chr22	41868792	41866831	+	6	GTAG	TGCGCCACAGGTGCAGCAGGTCCCG	TGATTACTGACAAATTGCAGCATCT	SREBF2,
chr13 : 21161790 - 21172681 : SKA3,	10.7041	0	13.5392	18.8652	12.4179	13.5607	12.6923	24.1507	8.13646	23.6574	0.566535	0.411383	0.998587	chr13	21161790	21172681	-	5	GTAG	ATCATCCAGCAGTTGGAAAAAAGTG	ATTCTCATTGGATAATCTTCAAAGT	SKA3,
chr5 : 32414969 - 32420103 : ZFR,	0	0	0	0	0	0	0	3.71549	3.48706	0	2.59104	0.412232	0.998587	chr5	32414969	32420103	-	5	GTAG	AGTACCACAGCAGTTACATATTCTG	GGCTACACCCGAAGCTGGCTGCTGG	ZFR,
chr8 : 67131951 - 67164508 : CSPP1,	0	3.49193	0	0	9.65836	2.71213	0	0	6.39294	0	1.76377	0.413573	0.998587	chr8	67131951	67164508	-	3	CTGC	CAGTTCATTCTGTCCAACCGTATTC	ACAGTGATGATGAAATTCCTATCAG	CSPP1,
chr14 : 80497469 - 80530886 : CEP128,	0	0	5.07722	6.6583	0	0	0	3.71549	0	0	-2.20832	0.413793	0.998587	chr14	80497469	80530886	-	5	GTAG	GAATATGGGAGCTAAAAAAGCAAAT	GATGGTCCAAGGCCACTTGGGTACT	CEP128,
chr3 : 172381093 - 172362633 : FNDC3B,	0	4.36492	0	14.4263	0	0	2.53847	3.71549	0	4.50617	-1.40537	0.414956	0.998587	chr3	172381093	172362633	+	6	GTAG	TGGAAGAGAATCTGAGTACAAACAG	TTCATTTATAGCCTGAATTCTGATC	FNDC3B,
chr18 : 13019206 - 12999421 : CEP192,	2.67601	3.49193	0	6.6583	0	2.71213	8.46157	2.78662	7.55529	13.5185	0.833986	0.41534	0.998587	chr18	13019206	12999421	+	6	GTAG	GGGTATTGTTCCAGATCTTAACAGT	TATACCTCGAAAATCTTCCATCTCA	CEP192,
chr9 : 5968019 - 5969436 : KIAA2026,	0	2.61895	10.1544	0	0	0	0	0	0	4.50617	-2.10566	0.415581	0.998587	chr9	5968019	5969436	-	5	GTAG	GCAAAACACAAGAAGCACAAATCTG	TTCTTTTCTTTCCTGCTCCCGAAGC	KIAA2026,
chr9 : 112250929 - 112297916 : PTBP3,	0	0	0	0	0	3.61617	0	0	3.48706	0	2.57292	0.415589	0.998587	chr9	112250929	112297916	-	5	GTAG	GAACCCCCTATGGCTGCTGCTTTTG	AAGAAAGAAGCTCATCAGATCCCCG	PTBP3,
chr7 : 77627675 - 77626705 : PTPN12,	0	0	0	4.43886	0	3.61617	0	3.71549	1.16235	11.2654	1.55927	0.417093	0.998587	chr7	77627675	77626705	+	6	GTAG	ACAACACATTCAGGTGCTGAAAAAG	TTTAGCATCCCCTTCAACAAGGCAA	PTPN12,
chr19 : 57925623 - 57928047 : ZNF418,	0	0	0	0	0	0	3.38463	3.71549	0	0	2.55599	0.418739	0.998587	chr19	57925623	57928047	-	5	GTAG	TGTCTTTCGTTGGCCAGAGGAATTG	TCATCTTCTGATCCACACCAACAAC	ZNF418,
chr2 : 231460795 - 231463294 : NCL,	0	0	5.07722	0	0	6.3283	13.5385	0	8.71764	0	2.00535	0.41938	0.998587	chr2	231460795	231463294	-	0	CCCC	GCTGCAAAAGTTGTTCCTGTGAAAG	TTTGGAGGAGGAGCCATTTTCTTGG	NCL,
chr4 : 128028853 - 128017358 : ABHD18,	0	0	0	0	0	3.61617	3.38463	0	0	0	2.53728	0.422238	0.998587	chr4	128028853	128017358	+	6	GTAG	TGTACTCATGTAGCAAATTTCTCAG	CATTTTTTAAGCTGGACCTTCTAGC	ABHD18,
chr11 : 34978182 - 34957384 : PDHX,	14.2721	3.49193	0	21.0846	11.0381	0	0	1.85775	1.74353	12.392	-1.14598	0.423474	0.998587	chr11	34978182	34957384	+	6	GTAG	CAAGGCAGCAGCTGTTACCCTTAAA	GTATATTTTTACTTCCTTCTTCAAC	PDHX,
chr20 : 49089746 - 49074785 : CSE1L,	0	0	0	0	0	0	3.38463	0	3.48706	0	2.52963	0.423672	0.998587	chr20	49089746	49074785	+	6	GTAG	AGCAAGTGCTGCAGCTGACAAAATT	TCTTCAAATGCTTCTTCATCAGCAG	CSE1L,
chr10 : 89762835 - 89751346 : KIF20B,	28.5441	10.4758	10.1544	0	15.1774	9.94448	10.1539	5.57324	5.23058	7.8858	-0.497988	0.425337	0.998587	chr10	89762835	89751346	+	6	GTAG	GAGGAAGAGTAATGAAATGGAGGAG	ATTATTTTCTCTTTAACATTTAGAT	KIF20B,
chr1 : 151427823 - 151442205 : POGZ,	5.35203	0	0	9.98744	0	3.61617	0	3.71549	0	0	-1.6502	0.425555	0.998587	chr1	151427823	151442205	-	5	GTAG	AGCGGACCTGAGTCTTCAATGAAAG	CATGAACAGGTCGGTGTCCGCCATG	POGZ,
chr1 : 108699273 - 108699632 : PRPF38B,	0	0	0	0	0	4.52022	0	0	2.3247	0	2.51464	0.426493	0.998587	chr1	108699273	108699632	-	0	TCAA	ACGCTCTAGTCGCTGGCGTTCTTTC	GGCGGCACAGAGATGACAAAAGAGA	PRPF38B,
chr3 : 101821750 - 101816795 : NXPE3,	0	0	0	9.98744	0	0	0	0	2.3247	0	-2.45597	0.42676	0.998587	chr3	101821750	101816795	+	6	GTAG	CAACGCCCAAGAGCTGGGACCTGAG	TGAGATAGTTCTAGACTGTTAGTTT	NXPE3,
chr2 : 110666263 - 110674365 : BUB1,	0	11.3488	0	7.76801	0	5.42426	0	0	0	0	-2.39995	0.427808	0.998587	chr2	110666263	110674365	-	5	GTAG	GCCCGCTTCCCAGGAAAGGTCCGAG	GCTCTGCATGTGGGCTTCAAGCATC	BUB1,
chr17 : 74203697 - 74209256 : RPL38,	0	6.11088	16.9241	0	0	0	0	0	6.39294	0	-2.38006	0.429546	0.998587	chr17	74203697	74209256	-	0	GGCC	GAGACACTCACAGCAAGCAGCAACC	GATGCAGCAGATACCTTTACACCCT	RPL38,
chr20 : 35713019 - 35725155 : RBM39,	0	0	5.07722	0	0	9.04043	2.53847	4.64437	2.90588	0	1.49613	0.430054	0.998587	chr20	35713019	35725155	-	5	GTAG	TCTTTGGCATTTGGTGCTGTGGCAG	AGGAGTTAAATTATCAATAGGTTCT	RBM39,
chr12 : 110487943 - 110485078 : FAM216A	0	0	0	0	0	0	4.23078	0	2.3247	0	2.45806	0.437136	0.998587	chr12	110487943	110485078	+	6	GTAG	CCAAGGAAACTGTTCATGCAAACAG	ACTTTGTATCCATCTTTGATTCTAT	FAM216A,
chr18 : 2892486 - 2884964 : EMILIN2,	0	0	0	0	0	0	4.23078	0	2.3247	0	2.45806	0.437136	0.998587	chr18	2892486	2884964	+	6	GTAG	CTGGTCAAATTTCAGCCATCAGCAA	TCTAGGTCTGAAGTTCACTCGATAC	EMILIN2,
chr19 : 4423874 - 4418020 : CHAF1A,	0	0	0	0	0	0	4.23078	0	2.3247	0	2.45806	0.437136	0.998587	chr19	4423874	4418020	+	6	GTAG	ACCAAAGACTCCACAGGCCCCCAAG	AGCCTTTGACGAATTTCTTAGTTAT	CHAF1A,
chr9 : 36351115 - 36357942 : RNF38,	0	0	0	0	0	3.61617	0	0	2.90588	0	2.44999	0.438137	0.998587	chr9	36351115	36357942	-	5	GTAG	AGATGGAGAAGTAGAAAATTACGAG	AAACAGGGACTGTTCCTTGATGGAG	RNF38,
chr4 : 177353728 - 177351380 : NEIL3,	7.13603	0	10.1544	4.43886	11.0381	3.61617	3.38463	22.293	5.23058	3.37963	0.631127	0.439916	0.998587	chr4	177353728	177351380	+	6	GTAG	GCTGCAACCCTGGATATTCTAACAG	TATAGTATTTCTAGTCGGTAGCTTG	NEIL3,
chr4 : 38826685 - 38829537 : TLR6,	5.35203	7.85685	6.76962	5.54858	0	6.3283	4.23078	4.64437	5.23058	3.37963	-0.644532	0.440204	0.998587	chr4	38826685	38829537	-	5	GTAG	CCCTGTGAATCATATTGGTCTTTGG	GAGCATCTTGATATGAGTCCAAATT	TLR6,
chr10 : 11997672 - 12014184 : UPF2,	3.56802	5.2379	0	0	0	0	2.53847	0	0	0	-2.25288	0.440957	0.998587	chr10	11997672	12014184	-	5	GTAG	CACTCTTCATAGTTCCTAGACAAAG	CTCCCCTTTAGAATGTAGAATGCGC	UPF2,	MRPL30
chr16 : 18841565 - 18845651 : SMG1,	0	0	0	0	0	0	0	3.71549	2.3247	0	2.33736	0.451377	0.998587	chr16	18841565	18845651	-	5	GTAG	GGAAGCTGCCTTACAAGCACAAAAG	CCTCATGATTGCAATTTTCTCTTCT	SMG1,
chr9 : 33960826 - 34017189 : UBAP2,	0	0	0	0	0	0	0	3.71549	2.3247	0	2.33736	0.451377	0.998587	chr9	33960826	34017189	-	5	GTAG	GACAACAGAAGACTGGACTGAAGAT	ATAATGTATGTACAAAATAGAAAAT	UBAP2,
chr2 : 99195756 - 99186177 : RP11-111H13	9.81205	19.2056	6.76962	32.1818	0	22.6011	10.1539	13.0042	15.6918	9.01234	-0.521706	0.452401	0.998587	chr2	99195756	99186177	+	6	GTAG	TGCAAATTGTTTTTATTTAAAGATG	GTGTAGTGATTGCTCTCTTTAGAGG	RP11-111H13.1,MRPL30,
chr3 : 134552012 - 134545586 : CEP63,	0	0	0	0	0	3.61617	0	0	2.3247	0	2.31637	0.45325	0.998587	chr3	134552012	134545586	+	6	GTAG	GAAATTGGAATTGGGTTTACATGAG	TCTGTTTCCGATTGACAAGCTGAGC	CEP63,
chr3 : 121644831 - 121660874 : HCLS1,	5.35203	0	6.76962	0	0	0	0	4.64437	0	0	-1.95143	0.454091	0.998587	chr3	121644831	121660874	-	0	CAGA	GGGGCAAGTACGGAGTTGAGAGGGA	CCCGGCTCCTCGCGTCCACACCGAC	HCLS1,
chr10 : 43176032 - 43154897 : CSGALNACT	2.67601	2.61895	0	6.6583	0	15.3687	12.6923	7.43099	0	0	0.966119	0.454143	0.998587	chr10	43176032	43154897	+	6	GTAG	TATCGTTCAGATTTCCTGACCATTG	ATCCATTATATTGGTAGTGATTTTT	CSGALNACT2,
chr17 : 67948306 - 67945409 : BPTF,	14.2721	6.11088	6.76962	14.4263	8.2786	12.6566	11.8462	10.2176	10.4612	28.1636	0.359198	0.456292	0.998587	chr17	67948306	67945409	+	6	GTAG	CAAGGATCTGCAAATTGAAGTGCAG	TTACTCTGCCTTTGTTCACCTGTAC	BPTF,
chr18 : 13042334 - 12999421 : CEP192,	4.46002	0	0	0	0	0	2.53847	12.0754	0	5.63271	1.53948	0.456834	0.998587	chr18	13042334	12999421	+	6	GTAG	AACGGCTGATAAAGGCAAAACAGAG	TATACCTCGAAAATCTTCCATCTCA	CEP192,
chrX : 44524002 - 44527365 : FUNDC1,	3.56802	3.49193	0	0	0	0	0	0	1.74353	0	-2.2024	0.457916	0.998587	chrX	44524002	44527365	-	5	GTAG	TATCTGCTGTAAAACAACCTATATG	GCACATAGCCACTATGACTAGCAAT	FUNDC1,
chr17 : 5365238 - 5346790 : RABEP1,	0	0	11.8468	0	0	0	0	3.71549	0	0	-2.20746	0.458347	0.998587	chr17	5365238	5346790	+	6	GTAG	AAGCAGCGAAGATTCGAGTCACCAG	CCAGATAATGATTCAGTTCTTTAAC	RABEP1,
chr16 : 74459682 - 74463479 : GLG1,	4.46002	5.2379	0	0	0	0	3.38463	0	0	0	-2.06439	0.467679	0.998587	chr16	74459682	74463479	-	5	GTAG	GATCAAAACAGAATTGTGTAAAAAG	TAGAATCTGCTTCCGGACAGAACCT	GLG1,
chr3 : 170122591 - 170129552 : PHC3,	3.56802	7.85685	13.5392	11.0972	5.51907	5.42426	4.23078	9.28874	8.13646	5.63271	-0.447052	0.469912	0.998587	chr3	170122591	170129552	-	5	GTAG	TTGACTTCTGAACATCCTTTGTTAG	TGAGGCTGAATTGGAGAATATGAAG	PHC3,
chr5 : 160089506 - 160094065 : PWWP2A,	2.67601	0	0	8.87773	0	0	0	4.64437	0	0	-1.89975	0.472879	0.998587	chr5	160089506	160094065	-	5	GTAG	CAAACAATTATCTGTGAGAGGCCAG	CACAGGGATACCATGGGGCCCAAAC	PWWP2A,
chr2 : 73573424 - 73534824 : ALMS1,	0	2.61895	0	0	0	5.42426	0	2.78662	5.81176	0	1.73858	0.474767	0.998587	chr2	73573424	73534824	+	6	GTAG	GCACACCAGAAGGAGACACATCCAG	TTATATGGCAATAATAAAGGCTGGC	ALMS1,
chr6 : 130955105 - 130956499 : EPB41L2,	6.24403	0	0	5.54858	0	0	0	0	4.64941	0	-1.85607	0.476366	0.998587	chr6	130955105	130956499	-	5	GTAG	CACCGAATACAGCTGTGACCTGGAG	TCAGTAGTCATGGCCACAGCTTATG	EPB41L2,
chr3 : 53501720 - 53497152 : CACNA1D,	4.46002	10.4758	0	0	0	0	0	0	6.97411	0	-1.62976	0.478034	0.998587	chr3	53501720	53497152	+	6	GTAG	TTCTAATTCAACAAATCATAACTTG	CTGGTGCCTCTTGCATAGTTTGCCT	CACNA1D,
chr14 : 73173707 - 73147795 : PSEN1,	16.0561	6.11088	3.38481	6.6583	5.51907	8.13639	13.5385	9.28874	5.81176	24.7839	0.414123	0.478263	0.998587	chr14	73173707	73147795	+	6	GTAG	TCTGTATAAATACAGGTGCTATAAG	TCACTTGCAGGCTCCCAGATTAGGT	PSEN1,
chr9 : 93498886 - 93471141 : FAM120A,	2.67601	0	10.1544	0	0	2.71213	3.38463	0	0	0	-1.61001	0.478539	0.998587	chr9	93498886	93471141	+	6	GTAG	TCATTTCATCCACCACATTACTTAG	GGTGATCCTCAATGCTCTGTGCAAC	FAM120A,
chr12 : 66217235 - 66203711 : IRAK3,	5.35203	0	0	0	8.2786	5.42426	0	8.35986	0	0	1.39331	0.479538	0.998587	chr12	66217235	66203711	+	6	GTAG	TATCTGAGCTTGAAGTTTTACTACT	AGCCAGCTGCTTGAAAGTCTCTCTG	IRAK3,
chr5 : 160051183 - 160010500 : TTC1,	0	4.36492	0	0	5.51907	2.71213	4.23078	0	0	5.63271	1.38061	0.481176	0.998587	chr5	160051183	160010500	+	6	GTAG	GAAAGACTAAAAGAAGAGATGTTAG	CCCAGTGAGGGAGGTGACGCTAAAG	TTC1,
chr1 : 192811432 - 192812202 : RGS2,	2.67601	0	0	0	8.2786	2.71213	3.38463	0	0	0	1.7155	0.481808	0.998587	chr1	192811432	192812202	-	0	CAGA	TAGCTTCTTGTATATTCTGGGCAAT	GTCCGTTATGAGTGCCAAAAATCTG	RGS2,
chr15 : 92956649 - 92924321 : CHD2,	0	0	6.76962	0	0	2.71213	7.61541	3.71549	1.74353	4.50617	1.15875	0.484965	0.998587	chr15	92956649	92924321	+	6	GTAG	TGCTGCACTTTATTATGCCGGAGAA	CGAAGCTTCTTCAGAGGCTGAGTGA	CHD2,
chr18 : 9221999 - 9182382 : ANKRD12,	305.957	279.355	186.165	150.921	201.446	179.905	218.308	228.503	211.548	220.802	-0.141571	0.489608	0.998587	chr18	9221999	9182382	+	6	GTAG	TCTGATGATGATGAAAGTTACACAG	TTTTATCAGTCTTCTCATCCTGGAT	ANKRD12,
chr5 : 113001674 - 112985835 : DCP2,	6.24403	0	0	3.32915	0	3.61617	0	0	0	0	-1.96877	0.489913	0.998587	chr5	113001674	112985835	+	6	GTAG	CTAAACCCACTGTGGAAAAATTGAG	GCTGGGAATATGCAAAATAAATCGG	DCP2,
chr10 : 91842391 - 91819270 : TNKS2,	5.35203	3.49193	0	0	0	0	0	0	0	3.37963	-2.00004	0.489983	0.998587	chr10	91842391	91819270	+	6	GTAG	CATTCAACACCTTTACATTTAGCAG	AAGAGTTCATCTTTCTTATATTCAC	TNKS2,
chr7 : 102195603 - 101916115 : CUX1,	8.02804	8.72983	0	0	0	3.61617	0	6.50212	0	0	-1.32732	0.490892	0.998587	chr7	102195603	101916115	+	6	GTAG	CGCATCTCCAACAGCGACCTGAGCG	CCGTTGCGGTGGCATCGAGTTCTCT	CUX1,
chr1 : 235686949 - 235734659 : LYST,	0	5.2379	0	2.21943	0	0	0	0	2.3247	0	-2.04455	0.492146	0.998587	chr1	235686949	235734659	-	5	GTAG	CACAAACAGATTTACAAGCAGCACG	AATACAAAACTAACTTGGCTCCATG	LYST,
chr14 : 49608121 - 49602370 : LRR1,	0	4.36492	0	0	2.75953	2.71213	5.9231	2.78662	2.3247	0	1.26307	0.492245	0.998587	chr14	49608121	49602370	+	6	GTAG	CTGCACGAACCATATTACATAATAG	AGAATTGCTCAATGTTCTCCCTTAG	LRR1,
chr5 : 74769052 - 74770777 : NSA2,	0	0	0	3.32915	13.7977	0	0	0	2.90588	0	1.7134	0.492816	0.998587	chr5	74769052	74770777	-	0	TTGG	TAAAGCTTAGCCTTCAGACCAATCA	TGTTGGAGATGGCTTTACAAGAAAA	NSA2,
chr2 : 231460788 - 231461913 : NCL,	0	0	10.1544	9.98744	0	0	0	0	6.97411	0	-2.0652	0.492823	0.998587	chr2	231460788	231461913	-	0	CGAA	AAGTTGTTCCTGTGAAAGCCAAGAA	CTTTTTGCCTGGAGTGACAGCTGCT	NCL,
chr2 : 101266879 - 101257791 : CNOT11,	0	0	0	4.43886	8.2786	3.61617	0	3.71549	1.74353	0	1.36156	0.493906	0.998587	chr2	101266879	101257791	+	6	GTAG	TACATTCAATGGAAGTTGTAAATCG	GGTGGAGTTATAGGAGGTAAAAATC	CNOT11,
chrX : 148662768 - 148651999 : AFF2,	24.9761	11.3488	10.1544	0	0	5.42426	9.30772	18.5775	5.81176	3.37963	-0.709152	0.495181	0.998587	chrX	148662768	148651999	+	6	GTAG	GTTCACCATCCTCCAAACAAGTGAA	TGCACTACGGTCTTGTTCATAGTGA	AFF2,
chr15 : 64500166 - 64499293 : ZNF609,	10.7041	9.60281	11.8468	7.76801	9.65836	6.3283	0	5.57324	11.6235	11.2654	-0.428932	0.499854	0.998587	chr15	64500166	64499293	+	6	GTAG	GCTAAAGAAAGTCAAGTCTGAAAAG	ACATGCCCAGTGGACAACATCATTG	ZNF609,
chr20 : 2965202 - 2947982 : PTPRA,	9.81205	7.85685	6.76962	0	6.89883	12.6566	5.07694	2.78662	15.6918	7.8858	0.481114	0.503694	0.998587	chr20	2965202	2947982	+	6	GTAG	ACTCCAGAAACTTTCCCTCCTTCAG	TAATTATGCTCTTTGAACATGTGTC	PTPRA,
chr9 : 125657651 - 125672643 : MAPKAP1,	7.13603	18.3326	8.46203	18.8652	13.7977	0	15.2308	11.1465	8.71764	13.5185	-0.372381	0.505298	0.998587	chr9	125657651	125672643	-	5	GTAG	CGAGTATTCCAAATTTGATGGCAAG	CATATTGTTTCACGAGCTCACCTAC	MAPKAP1,
chr3 : 183762279 - 183747672 : YEATS2,	0	0	0	8.87773	0	0	0	0	2.90588	0	-2.05106	0.506173	0.998587	chr3	183762279	183747672	+	6	GTAG	GTCAGCAAAGGTTCAGCCCTCCAAG	GCAAGCCAGTATAAGTTCTATCCAG	YEATS2,
chr14 : 73282359 - 73287314 : NUMB,	0	4.36492	0	4.43886	0	5.42426	0	4.64437	11.6235	4.50617	0.977046	0.507885	0.998587	chr14	73282359	73287314	-	5	GTAG	GCACCACAATCTCCTACCTTCCAAG	CTACTGCATGGCTCAACCTTTCACC	NUMB,
chr5 : 177050936 - 177041126 : ZNF346,	2.67601	0	0	4.43886	0	0	0	0	2.3247	0	-1.97035	0.507947	0.998587	chr5	177050936	177041126	+	6	GTAG	GACCCTGCTGTCACTGACTTTCCAG	TGGTTCTTCTGGATCATGTGCTCCA	ZNF346,
chr3 : 122325276 - 122341600 : CSTA,	0	2.61895	0	6.6583	0	0	0	3.71549	0	0	-1.88915	0.510159	0.998587	chr3	122325276	122341600	-	0	TTAG	GGTATCATTTTGGCTGATTGCTTCT	ACCCAAAGTGTTCTGATTCCTTCAA	CSTA,
chr9 : 5954016 - 5988545 : KIAA2026,	0	2.61895	0	0	0	0	7.61541	0	6.39294	0	1.74425	0.51346	0.998587	chr9	5954016	5988545	-	5	GTAG	GTCACCTACTGTACCAGAGTTTCAG	TATCGTTGTCTTTTCTCTCAAGTGC	KIAA2026,
chr3 : 172251541 - 172226871 : FNDC3B,	15.1641	13.0947	5.07722	11.0972	9.65836	8.13639	16.077	22.293	8.71764	20.2778	0.298139	0.517771	0.998587	chr3	172251541	172226871	+	6	GTAG	AAGTCGAATGATTCAGACTTGCAAG	GACATCATGGGAACTTCAGCAGGTC	FNDC3B,
chr2 : 229858772 - 229860531 : TRIP12,	6.24403	5.2379	0	0	0	0	0	0	5.23058	0	-1.66222	0.520358	0.998587	chr2	229858772	229860531	-	5	GTAG	TCTGGATTACAGGCCAAATTAGCAA	ATGTTTTGCCTGCCCTAAATGTGAC	TRIP12,
chr7 : 26193622 - 26196910 : HNRNPA2B1,	0	4.36492	0	0	6.89883	5.42426	0	5.57324	0	0	1.3788	0.520782	0.998587	chr7	26193622	26196910	-	0	CAGG	ATGGTGGTGGAGGACCTGGATATGG	AATTATCTCAATGGTATCAATTTTT	HNRNPA2B1,
chr9 : 107311737 - 107300141 : RAD23B,	6.24403	2.61895	8.46203	7.76801	0	5.42426	0	8.35986	6.39294	3.37963	-0.62675	0.522322	0.998587	chr9	107311737	107300141	+	6	GTAG	TTTGAAGATGCAACGAGTGCACTTG	CAATCTTCTCTTTCAGTGCTTTCAC	RAD23B,
chr8 : 123333878 - 123337821 : ATAD2,	3.56802	0	0	0	0	4.52022	2.53847	3.71549	3.48706	0	1.36605	0.522565	0.998587	chr8	123333878	123337821	-	5	GTAG	ACTCCTGTGGCTTGCAGCACTCCTG	GGGAGTACCTCCAAAGCCTGCAAAA	ATAD2,
chrX : 77633207 - 77664778 : ATRX,	7.13603	5.2379	0	0	0	3.61617	3.38463	0	0	0	-1.41203	0.523926	0.998587	chrX	77633207	77664778	-	5	GTAG	TTTAACAAAGCTTTGGTTGATCCAG	TTCTAAAAGCATCTTCTTGGCAATT	ATRX,
chr1 : 20757166 - 20773610 : HP1BP3,	3.56802	2.61895	0	0	0	3.61617	9.30772	2.78662	4.06823	0	1.04714	0.525168	0.998587	chr1	20757166	20773610	-	5	GTAG	CAAAGGTGCTTCGGGGACATTCCAG	CTTTTCTTTAGACTGATCTTTCTCA	HP1BP3,
chr17 : 46170855 - 46172232 : KANSL1,	5.35203	0	0	7.76801	6.89883	2.71213	2.53847	2.78662	5.23058	12.392	0.678337	0.525318	0.998587	chr17	46170855	46172232	-	5	GTAG	ATCCCGAGCAGCGTCATGTACCCCT	CCTTACTGCCTCCCCAGAGAACAGA	KANSL1,
chr1 : 35361789 - 35358925 : ZMYM4,	9.81205	2.61895	0	5.54858	0	3.61617	1.69231	0	4.06823	5.63271	-0.855314	0.528161	0.998587	chr1	35361789	35358925	+	6	GTAG	AAAAGATGAACCTGACAATGCTCAA	ATTTCTGTATCCATGATACCACCAC	ZMYM4,	AC090094.1	ASPH
chr16 : 57164001 - 57173869 : FAM192A,	4.46002	19.2056	10.1544	0	0	3.61617	0	14.862	6.39294	3.37963	-0.833605	0.530576	0.998587	chr16	57164001	57173869	-	5	GTAG	CCTGAGCCAGATGACAAGAATCAAG	CTCCATCCATAATGAAACAACCAAT	FAM192A,
chr17 : 74203693 - 74209304 : RPL38,	8.92004	13.9677	10.1544	12.2069	30.3549	27.1213	21.1539	0	3.48706	16.8981	0.531206	0.533698	0.998587	chr17	74203693	74209304	-	0	AAGG	CACTCACAGCAAGCAGCAACCGGGG	CAGAGAAACTGAAGCAGTCCCTGCC	RPL38,
chr1 : 92345914 - 92307188 : RPAP2,	0	8.72983	0	0	0	0	3.38463	0	0	0	-1.91401	0.534295	0.998587	chr1	92345914	92307188	+	6	GTAG	TAATTGCTATGGTGTTGCTGTCATT	GATAACAAAAATTGCTGCAAAAAGA	RPAP2,
chr8 : 61618978 - 61653660 : ASPH,AC0900	8.92004	0	8.46203	13.3166	11.0381	3.61617	3.38463	6.50212	6.97411	0	-0.541777	0.537006	0.998587	chr8	61618978	61653660	-	5	GTAG	GATGATCCAGAACAAAAAGCAAAAG	TCTGAAGTAGATCTCTCTTTAAGTC	ASPH,AC090094.1,ASPH,
chr4 : 128946007 - 129003876 : SCLT1,	0	7.85685	0	8.87773	6.89883	0	0	4.64437	0	0	-1.17377	0.53981	0.998587	chr4	128946007	129003876	-	5	GTAG	ATAGAATAAAACAACTTGAAACTGA	AGCATCTTTTAATTCACTGTGCAAC	SCLT1,
chr12 : 350621 - 356537 : KDM5A,	0	6.11088	5.07722	0	0	0	0	0	0	5.63271	-1.60076	0.540954	0.998587	chr12	350621	356537	-	5	GTAG	GAGAAAGATTCTGCCAGAAGAAGAG	TTCTACTCACATCTCCAGATTCTGA	KDM5A,
chr12 : 69353251 - 69354049 : LYZ,	4.46002	0	0	0	5.51907	0	3.38463	0	4.06823	3.37963	1.22269	0.542464	0.998587	chr12	69353251	69354049	-	0	CAAT	TCCTACTCCCTTAATGTGAGAGAGA	CAGACTGCCTGAATTGAGAATTTTG	LYZ,
chr18 : 50924212 - 50918110 : ME2,	5.35203	4.36492	8.46203	0	0	4.52022	0	5.57324	1.74353	3.37963	-0.816741	0.546829	0.998587	chr18	50924212	50918110	+	6	GTAG	ATACTGAAGCCTTCAACTATAATTG	TGTAAAATGGGTCTTTTAAGAGTGC	ME2,
chr11 : 130122513 - 130109429 : APLP2,	6.24403	3.49193	0	2.21943	0	4.52022	0	0	0	3.37963	-1.21476	0.547442	0.998587	chr11	130122513	130109429	+	6	GTAG	AAGGAAATTACTCATGATGTCAAAG	CTGTTCCGGCATTGGCTGCAAGAGC	APLP2,
chr15 : 63696124 - 63716473 : HERC1,	0	5.2379	0	11.0972	4.1393	0	0	5.57324	2.3247	0	-1.04631	0.547701	0.998587	chr15	63696124	63716473	-	5	GTAG	GAGTGGCCGATTGCATCACTATCAG	CTGCAGAGTCCTGGTTTTCTGATAT	HERC1,
chr13 : 32517857 - 32527532 : N4BP2L2,	5.35203	5.2379	5.07722	0	0	2.71213	4.23078	4.64437	1.16235	0	-0.858597	0.550691	0.998587	chr13	32517857	32527532	-	5	GTAG	CTCCTCCTCCACAGGGGAGACAGAG	ATCACGATTCTGACCAAGCAGAATT	N4BP2L2,
chr2 : 175111568 - 175121540 : ATF2,	5.35203	9.60281	8.46203	4.43886	8.2786	11.7526	0	7.43099	0	0	-0.625653	0.551849	0.998587	chr2	175111568	175121540	-	5	GTAG	ACCAGTACAGTCAGAAGCAAAAATG	CCAAATGATCCTCGTTGGTAAAACG	ATF2,
chr10 : 17233620 - 17237262 : VIM,	4.46002	0	10.1544	5.54858	13.7977	10.8485	0	7.43099	2.90588	7.8858	0.538026	0.553565	0.998587	chr10	17233620	17237262	-	5	GTAG	GCAAAGATTCCACTTTGCGTTCAAG	CGAAACTTCTCAGCATCACGATGAC	VIM,
chr2 : 231460740 - 231461658 : NCL,	0	0	0	8.87773	0	0	0	3.71549	0	0	-1.82074	0.553737	0.998587	chr2	231460740	231461658	-	0	CGGA	AAGAGGATGATGAGGACGAGGATGA	TGCTGGTTCAATTTCATCTTCATCC	NCL,
chr12 : 45926142 - 45928859 : SCAF11,	2.67601	12.2218	0	7.76801	0	5.42426	5.9231	4.64437	5.23058	0	-0.673083	0.554466	0.998587	chr12	45926142	45928859	-	5	GTAG	CAAGAGGAGGAAACATCTGGACAGG	AATGCATATCCCTTGCAAGAAGTAC	SCAF11,
chr11 : 76472840 - 76463821 : EMSY,	6.24403	6.98387	0	3.32915	6.89883	3.61617	7.61541	15.7909	4.06823	0	0.551483	0.55475	0.998587	chr11	76472840	76463821	+	6	GTAG	GTGGTCATGTCAACAGTAGCACAAG	TCATCTTCATCTGAACAGCTTACAC	EMSY,
chr6 : 4892379 - 4891713 : CDYL,	3.56802	0	0	0	4.1393	3.61617	0	1.85775	4.06823	0	1.29272	0.555121	0.998587	chr6	4892379	4891713	+	6	GTAG	ACAGGCTTAGCTGTTAACGGGAAAG	TCCTTTTGTCAACAATCCTTTCAAC	CDYL,
chr21 : 31700995 - 31706357 : SCAF4,	5.35203	0	0	5.54858	4.1393	0	0	4.64437	10.4612	10.1389	0.821274	0.555978	0.998587	chr21	31700995	31706357	-	5	GTAG	TGAACAGAAAACTGCATTTGACAAG	GTTTCATATCCATAAGCGAAAAGAG	SCAF4,
chr3 : 197875775 - 197865423 : LRCH3,	5.35203	0	0	14.4263	0	0	0	0	5.23058	5.63271	-1.44223	0.556992	0.998587	chr3	197875775	197865423	+	6	GTAG	TTGCAGAAAAATTGGTGTACCTCAG	ATAGAGCATTAGGTCTGTCATCACT	LRCH3,
chr13 : 21167988 - 21172681 : SKA3,	8.92004	4.36492	0	12.2069	9.65836	6.3283	2.53847	17.6486	7.55529	9.01234	0.406792	0.557671	0.998587	chr13	21167988	21172681	-	5	GTAG	TTAAAAATGCGAGGAATAATAAAAG	ATTCTCATTGGATAATCTTCAAAGT	SKA3,
chr4 : 15625252 - 15644708 : FBXL5,	0	2.61895	11.8468	0	5.51907	0	0	0	2.3247	2.25309	-1.09795	0.559725	0.998587	chr4	15625252	15644708	-	5	GTAG	ATCAGATCACAGACCATGGTCTCAG	TGTTGGAAAAATTGGTTTTAGAAAG	FBXL5,
chr14 : 21503173 - 21503881 : METTL3,	2.67601	8.72983	0	0	11.0381	5.42426	0	0	3.48706	11.2654	0.7897	0.559961	0.998587	chr14	21503173	21503881	-	5	GTAG	CACTAAGGAACAACAGAGCAAGAAG	AATGCTGCCTCTGGATTCCGTAGAT	METTL3,
chr9 : 37126942 - 37126312 : ZCCHC7,	15.1641	5.2379	0	9.98744	5.51907	5.42426	2.53847	4.64437	4.64941	12.392	-0.440655	0.561131	0.998587	chr9	37126942	37126312	+	6	GTAG	GGATGTGAAAACTCTGTTACTGAAG	TCATAAAAAGTCAGTAACCTTGAAG	ZCCHC7,
chr2 : 178542361 - 178535732 : TTN,	0	0	0	3.32915	0	0	0	0	6.39294	7.8858	1.51561	0.561872	0.998587	chr2	178542361	178535732	+	6	GTAG	ACGGAACACATACTCATTTCCTTCG	GTGGCAAACCAGATCCTGTGATCAC	TTN,
chr22 : 40951400 - 40967884 : RBX1,	6.24403	0	0	0	5.51907	0	4.23078	2.78662	0	7.8858	1.05356	0.563034	0.998587	chr22	40951400	40967884	-	0	TTAC	GTATCCACATCCATCGCTGCCGCCA	ACAACAGAGAGTGGGAATTCCAAAA	RBX1,
chr8 : 38347497 - 38348215 : WHSC1L1,	8.92004	7.85685	11.8468	0	0	3.61617	6.76925	14.862	2.90588	0	-0.575975	0.571024	0.998587	chr8	38347497	38348215	-	5	GTAG	CAAATTAGAACCAGAGGAACAAAAT	TAACTTTCCCTTTCTCTCATCGGGC	WHSC1L1,
chr18 : 57611637 - 57615975 : NARS,	2.67601	3.49193	0	0	0	0	6.76925	8.35986	0	4.50617	1.03156	0.574034	0.998587	chr18	57611637	57615975	-	5	GTAG	TCAGTGTGTCTTGGCGGATGAGTTG	GTTCTTTCCCTACTGTCATCAAAGC	NARS,
chr6 : 158625754 - 158573420 : TMEM181,	3.56802	0	0	0	0	0	4.23078	3.71549	5.81176	0	1.32875	0.575328	0.998587	chr6	158625754	158573420	+	6	GTAG	TGACTTTCGTAGTACTTGTCATTAG	CGTGTAGAGCCGCATGGGCGCCAGC	TMEM181,
chr18 : 50932360 - 50918110 : ME2,	6.24403	13.9677	0	6.6583	9.65836	5.42426	4.23078	7.43099	17.4353	10.1389	0.372713	0.576026	0.998587	chr18	50932360	50918110	+	6	GTAG	GGAAACAATGTTTATATTTTTCCAG	TGTAAAATGGGTCTTTTAAGAGTGC	ME2,
chr7 : 158918869 - 158879684 : WDR60,	8.02804	0	0	0	0	3.61617	0	0	0	0	-1.7204	0.576475	0.998587	chr7	158918869	158879684	+	6	GTAG	AACACCAGTCTACCATTCCTTCAAA	TGTCCTTGCTGTCTCCGTACTGCAG	WDR60,
chr15 : 32888172 - 33092203 : FMN1,	0	6.98387	0	0	0	0	0	0	2.90588	0	-1.72348	0.57776	0.998587	chr15	32888172	33092203	-	5	GTAG	AGAAAACTGAAGAGGCAACTAGAAG	ATGAGCTGCACTTCCTGATGCTAAC	FMN1,
chr3 : 33409236 - 33425741 : UBP1,	3.56802	0	0	0	0	0	3.38463	0	6.97411	3.37963	1.32473	0.578628	0.998587	chr3	33409236	33425741	-	5	GTAG	CTATGATACCACAATCCTCACAGAG	GAAAATGGGCAATGCCAAGACATCA	UBP1,
chr11 : 34092056 - 34090179 : CAPRIN1,	4.46002	2.61895	0	4.43886	0	0	0	5.57324	2.3247	0	-1.11832	0.579288	0.998587	chr11	34092056	34090179	+	6	GTAG	CTTCAGCAAGAACAGCTTCAAACAG	CACTTGTGGATGATACCAAAGGAAC	CAPRIN1,
chr20 : 32094016 - 32088568 : HCK,	5.35203	0	0	4.43886	5.51907	0	0	0	0	0	-1.49929	0.581795	0.998587	chr20	32094016	32088568	+	6	GTAG	GACAACGAGTACACGGCTCGGGAAG	CTTTTCAGAAAGTCCAGCAAGCTTC	HCK,
chr16 : 13934192 - 13935743 : ERCC4,	0	4.36492	0	0	0	0	0	10.2176	6.39294	0	1.30868	0.58561	0.998587	chr16	13934192	13935743	-	3	CTGC	TCTAGGACCAGTTCCTTTTTTGTTT	CGAGTAGGCCTGGGAAACCTCTGAG	ERCC4,
chr18 : 24083081 - 24064140 : TTC39C,	8.92004	0	8.46203	0	8.2786	8.13639	5.07694	5.57324	4.64941	4.50617	0.507088	0.586686	0.998587	chr18	24083081	24064140	+	6	GTAG	CAAGGGACGGATACAACGACTAGAG	AAAACTCATTAGTGGGCTATGATTT	TTC39C,
chr5 : 160093101 - 160094065 : PWWP2A,	0	0	0	4.43886	4.1393	0	5.9231	5.57324	0	0	1.22232	0.587468	0.998587	chr5	160093101	160094065	-	5	GTAG	CGCTGCACCTCTACCCGCTCAGCAG	CACAGGGATACCATGGGGCCCAAAC	PWWP2A,
chr3 : 47067070 - 47098081 : SETD2,	3.56802	0	0	0	0	11.7526	0	2.78662	0	0	1.39945	0.589649	0.998587	chr3	47067070	47098081	-	5	GTAG	AGTCAAACTGAAAAGGAAAACACAA	GCAGAAACATTTCTGGGCTTCTTTT	SETD2,
chr4 : 128028853 - 128017363 : ABHD18,	8.02804	2.61895	0	0	0	0	0	0	5.81176	0	-1.40987	0.590802	0.998587	chr4	128028853	128017363	+	6	GTAG	TGTACTCATGTAGCAAATTTCTCAG	GGACACATTTTTTAAGCTGGACCTT	ABHD18,
chr10 : 101792839 - 101810314 : MGEA5,	3.56802	0	5.07722	2.21943	4.1393	8.13639	5.9231	0	2.3247	4.50617	0.662172	0.595368	0.998587	chr10	101792839	101810314	-	5	GTAG	CAGACCTTATTTTCCTAAGGATGAG	GCAGAGATGAGAGTCATAAGTTGCT	MGEA5,
chr18 : 47865059 - 47896809 : SMAD2,	0	3.49193	0	0	0	0	2.53847	7.43099	0	3.37963	1.29182	0.595407	0.998587	chr18	47865059	47896809	-	5	GTAG	CAGTTGAATCAAAGTATGGACACAG	AGGAAAACAGCCTCTTGTATCGAAC	SMAD2,
chr10 : 68755536 - 68722455 : CCAR1,	0	0	5.07722	0	0	0	0	4.64437	0	12.392	1.24924	0.600935	0.998587	chr10	68755536	68722455	+	6	GTAG	TTGATCTAAGTGTGTGCACACAATG	CTTGTTTGTCTTCTATAGCATCGAT	CCAR1,
chr14 : 92014215 - 92033253 : TRIP11,	0	0	6.76962	0	0	0	0	0	2.90588	0	-1.61316	0.602846	0.998587	chr14	92014215	92033253	-	5	GTAG	TTCAGACTACAACAAGCACTGTCTG	TTTGTCCTAGAATCAGGTAATTCTG	TRIP11,
chr3 : 47056821 - 47067118 : SETD2,	6.24403	0	0	4.43886	0	2.71213	0	0	4.06823	0	-1.20657	0.603469	0.998587	chr3	47056821	47067118	-	5	GTAG	ACAGACAACTCCACCAATTGTACAG	TTTTCTTTGGAATTCGATATACCTC	SETD2,
chr14 : 73103255 - 73106036 : RBM25,	0	0	13.5392	3.32915	0	0	8.46157	0	0	0	-1.55506	0.60517	0.998587	chr14	73103255	73106036	-	0	TCTT	CCCTTTCACGCTCCCTCTCTCTTTC	TGAAGAAGATGCATACGAACGAAGA	RBM25,
chr8 : 67287955 - 67302466 : ARFGEF1,	8.92004	4.36492	0	9.98744	0	4.52022	0	0	9.87999	7.8858	-0.642886	0.606632	0.998587	chr8	67287955	67302466	-	5	GTAG	GAAATGGTGAACATTGTTGTTGGAG	TTTTCAGTTTCCGCTTTTATTTCCT	ARFGEF1,
chr17 : 32368014 - 32362914 : ZNF207,	5.35203	0	10.1544	7.76801	0	2.71213	4.23078	5.57324	5.23058	5.63271	-0.518037	0.606684	0.998587	chr17	32368014	32362914	+	6	GTAG	CCATCCAGATGAGGATATATCCCTG	CATCATTCCACCCATTGGCATCATT	ZNF207,
chr9 : 33953285 - 33996333 : UBAP2,	4.46002	0	0	0	0	6.3283	5.07694	3.71549	0	0	1.13437	0.615059	0.998587	chr9	33953285	33996333	-	5	GTAG	CAACTCCTGTTCTCCTCAGAGCCTG	GATTTTTCCCTGTCACTTCCATAAG	UBAP2,
chr5 : 50797233 - 50788523 : PARP8,	2.67601	5.2379	0	0	0	0	0	0	0	4.50617	-1.45027	0.617687	0.998587	chr5	50797233	50788523	+	6	GTAG	GTTTCAAAATGGCCCTATGCTTAGG	ATCTGAAAGACATCAACAGTGGGCA	PARP8,
chr17 : 38850425 - 38853707 : RPL23,	0	0	0	4.43886	0	7.23235	0	8.35986	0	0	1.22756	0.618848	0.998587	chr17	38850425	38853707	-	0	GCTG	CGAAAGTCATACCGTAGAAAAGATG	GAAACAAAACCTCACCTCGCTTCGA	RPL23,
chr3 : 183786301 - 183747672 : YEATS2,	0	5.2379	0	0	0	0	0	0	2.3247	0	-1.54961	0.6198	0.998587	chr3	183786301	183747672	+	6	GTAG	CTCAGCAAACGGTCCTGCACAACAG	GCAAGCCAGTATAAGTTCTATCCAG	YEATS2,
chr3 : 136464881 - 136502779 : STAG1,	8.02804	0	0	0	0	0	7.61541	4.64437	0	18.0247	1.30688	0.620732	0.998587	chr3	136464881	136502779	-	5	GTAG	CAGCTGGAGAGTTCCTTCACAAAAA	ACCAGAGCAGTCATGAGCTTCATGG	STAG1,
chr12 : 14942075 - 14942493 : ARHGDIB,	8.02804	0	0	0	0	0	4.23078	0	0	0	-1.50636	0.623687	0.998587	chr12	14942075	14942493	-	0	CAGC	GAGGGAGTTCTTCTTTTGTGAGAGA	ACGCCTGAGAGAATTCTTCCAGGTG	ARHGDIB,
chr2 : 68545312 - 68490190 : APLF,	8.92004	6.11088	0	0	5.51907	2.71213	9.30772	7.43099	8.71764	0	0.529932	0.624419	0.998587	chr2	68545312	68490190	+	6	GTAG	GTCCCTATGGACCATCCTGTTATAG	TTCTGGATACTCTCTTGTCTGTTAT	APLF,
chr7 : 99493040 - 99494631 : ZNF394,	4.46002	0	3.38481	0	6.89883	0	3.38463	4.64437	0	5.63271	0.801867	0.62451	0.998587	chr7	99493040	99494631	-	5	GTAG	CTTCTGAAATGTGAGCTGATGCCAG	TTGTTCTCCACTCTGCTTTCCAAAC	ZNF394,
chr6 : 75711416 - 75702645 : SENP6,	4.46002	3.49193	8.46203	0	0	0	5.07694	0	8.13646	0	-0.830189	0.626257	0.998587	chr6	75711416	75702645	+	6	GTAG	ATTTAAAGCCTACTATCTGTAAACA	AACAACAGCCAAAAACCAGTGTGCA	SENP6,
chr4 : 128098330 - 128074460 : LARP1B,	0	0	6.76962	0	8.2786	2.71213	0	3.71549	0	3.37963	0.922898	0.627837	0.998587	chr4	128098330	128074460	+	6	GTAG	TACAAACCTTAATCTCATCTTAGAG	TTTATAATTTTGAGGGAACCGAATT	LARP1B,
chr1 : 21715389 - 21724095 : USP48,	0	0	0	9.98744	0	0	0	0	0	5.63271	-1.43794	0.629567	0.998587	chr1	21715389	21724095	-	5	GTAG	AATGAAGATATTCTGTGTCCACATG	TCCAGAGAGACAAACTCATAGGGCT	USP48,
chr14 : 49799475 - 49831361 : NEMF,	7.13603	2.61895	6.76962	3.32915	8.2786	0	6.76925	4.64437	0	0	-0.617638	0.63133	0.998587	chr14	49799475	49831361	-	5	GTAG	GACATTTGTCAGCCAAGGAAAGAAG	TCTTGGAATAAAATTCATCCACCGC	NEMF,
chr2 : 61522611 - 61533903 : XPO1,	4.46002	3.49193	0	0	0	4.52022	10.1539	3.71549	2.3247	0	0.755964	0.63246	0.998587	chr2	61522611	61533903	-	5	GTAG	ATTCTTCCAAGGAACCAGTGCGAAG	TTGTCATAATTGCTGGCATAGATTA	XPO1,
chr15 : 62007308 - 62013992 : VPS13C,	4.46002	4.36492	0	0	0	5.42426	0	3.71549	3.48706	10.1389	0.726165	0.633515	0.998587	chr15	62007308	62013992	-	5	GTAG	AGAAGAAATACAGAAAGAAATTCAG	ATGGAGTCCAGTGTTCATTTGCAGT	VPS13C,
chr1 : 41070595 - 41075451 : SCMH1,	4.46002	13.9677	11.8468	9.98744	0	13.5607	6.76925	11.1465	3.48706	13.5185	-0.303478	0.634184	0.998587	chr1	41070595	41075451	-	5	GTAG	AGCTCAGCCATGCAGGCCCCAACAG	GGATAGGGATTCTTTGGAATCACAA	SCMH1,
chr17 : 38850420 - 38853732 : RPL23,	0	0	0	6.6583	5.51907	0	0	0	9.29882	4.50617	0.951751	0.635738	0.998587	chr17	38850420	38853732	-	0	TTTT	GTCATACCGTAGAAAAGATGGCGTG	CATCTTGAACGCCGGAAAAAAGAAA	RPL23,
chr1 : 13782831 - 13778418 : PRDM2,	2.67601	0	6.76962	0	0	2.71213	7.61541	0	4.06823	7.8858	0.730937	0.637494	0.998587	chr1	13782831	13778418	+	6	GTAG	CCAAGCAGGAGCTGAAGGACTTCAG	GGCTTCTCTTCGTCTTCTTTAGGAC	PRDM2,
chr18 : 37067545 - 37066890 : KIAA1328,	8.02804	5.2379	0	2.21943	8.2786	0	0	0	0	5.63271	-0.819719	0.638446	0.998587	chr18	37067545	37066890	+	6	GTAG	ACCAGTCTCGACTGGATTACAATTG	GGAGAGTGCTTTTTCTACTGGATAC	KIAA1328,
chr13 : 45970362 - 45989097 : ZC3H13,	0	2.61895	0	9.98744	4.1393	0	0	5.57324	0	0	-0.994971	0.639937	0.998587	chr13	45970362	45989097	-	5	GTAG	GCCTACAACAGTGGAGATGATAAAA	ATGCTGTCCTGCTGGGGAAGTAGAC	ZC3H13,
chr20 : 35707120 - 35725155 : RBM39,	0	3.49193	0	0	0	0	3.38463	0	9.29882	0	1.25442	0.641665	0.998587	chr20	35707120	35725155	-	5	GTAG	TCTCTAACATGTTTAACCCTCAAAC	AGGAGTTAAATTATCAATAGGTTCT	RBM39,
chr8 : 67149783 - 67164508 : CSPP1,	0	0	0	6.6583	0	3.61617	0	0	0	0	-1.43605	0.64216	0.998587	chr8	67149783	67164508	-	3	CTGC	TGTCTGTGCATCCTATTCAAATCAG	ACAGTGATGATGAAATTCCTATCAG	CSPP1,
chr14 : 49825867 - 49831361 : NEMF,	8.92004	2.61895	0	4.43886	0	6.3283	4.23078	0	4.06823	0	-0.703537	0.642441	0.998587	chr14	49825867	49831361	-	5	GTAG	TTCAAAAAGCAAGAAAAGTATATTG	TCTTGGAATAAAATTCATCCACCGC	NEMF,
chr5 : 138424341 - 138420706 : KDM3B,	6.24403	0	0	0	0	0	3.38463	0	0	0	-1.43487	0.643127	0.998587	chr5	138424341	138420706	+	6	GTAG	CCGGGAGTGTTGGAAGCAAGGTCAG	AGCACCGACCTCAGGGACCCTGCTT	KDM3B,	AC007192.4	IFI30
chr2 : 159337567 - 159395834 : BAZ2B,	0	4.36492	0	0	0	0	0	3.71549	11.0423	0	1.15253	0.645743	0.998587	chr2	159337567	159395834	-	5	GTAG	ATTTGGAGCGGAACATTGAAAGAAG	TGTGTTGTCGCCTTCGCTCTCGTTC	BAZ2B,
chr7 : 103321932 - 103322794 : DNAJC2,	0	12.2218	0	0	8.2786	0	0	0	0	0	-1.21675	0.646592	0.998587	chr7	103321932	103322794	-	5	GTAG	GCAAAAACTTCGAAACTCATGCAAG	TTCAATCCATCTCCTCTCATCACGA	DNAJC2,
chr2 : 231087181 - 231075511 : PSMD1,	0	3.49193	0	0	9.65836	0	0	0	0	3.37963	1.23813	0.64693	0.998587	chr2	231087181	231075511	+	6	GTAG	AATCACTTGGGTTCATTCTATTCAG	CTTTTCTTCTGTTTCCATCGAGTCA	PSMD1,
chr13 : 21157922 - 21172681 : SKA3,	6.24403	0	5.07722	0	5.51907	8.13639	0	9.28874	3.48706	0	0.658135	0.648531	0.998587	chr13	21157922	21172681	-	5	GTAG	TAAAATTCCAGAAGATATTCTCCAG	ATTCTCATTGGATAATCTTCAAAGT	SKA3,
chr17 : 38850413 - 38853725 : RPL23,	7.13603	0	0	0	0	4.52022	11	8.35986	0	0	1.13525	0.650929	0.998587	chr17	38850413	38853725	-	0	ATTT	CGTAGAAAAGATGGCGTGTTTCTTT	GCTTCGACATCTTGAACGCCGGAAA	RPL23,	MRPL30
chr15 : 59671183 - 59680308 : BNIP2,	3.56802	10.4758	0	0	0	7.23235	0	0	4.06823	0	-0.894304	0.651156	0.998587	chr15	59671183	59680308	-	5	GTAG	AATGTTATCAGCAAATTGATAGAAG	AATACTATCATCTTCTGGTAAAGGT	BNIP2,
chr11 : 77698487 - 77702495 : RSF1,	2.67601	6.11088	0	0	0	0	0	8.35986	3.48706	11.2654	0.761153	0.652383	0.998587	chr11	77698487	77702495	-	5	GTAG	TGGCCTTCCAAACCATCCTGAGCTA	ATCTTTTCACTTTCTTTCTGTTCCT	RSF1,
chr19 : 18175137 - 18177930 : IFI30,AC0	3.56802	0	0	6.6583	0	0	6.76925	0	0	0	-1.17064	0.652948	0.998587	chr19	18175137	18177930	-	0	CTCT	GGGAAGAGCTCCCGGATCAGGAAGG	AAGTGATGGCCGGTGAGCTGCGGAG	IFI30,AC007192.4,IFI30,
chr9 : 33944365 - 33948587 : UBAP2,	2.67601	3.49193	0	0	0	0	0	0	3.48706	0	-1.32978	0.654359	0.998587	chr9	33944365	33948587	-	5	GTAG	GCGGCGGATACCCCCAGCTTCTAAG	CAAATCCTGAGCCAAGGACGGATGA	UBAP2,
chr2 : 99195756 - 99194751 : RP11-111H13	3.56802	0	0	7.76801	0	0	0	0	4.06823	4.50617	-0.97991	0.656742	0.998587	chr2	99195756	99194751	+	6	GTAG	TGCAAATTGTTTTTATTTAAAGATG	GATCTTCAGGTGAGGCCTGAAACAC	RP11-111H13.1,MRPL30,
chrX : 10098579 - 10063445 : WWC3,	8.92004	0	0	0	5.51907	0	0	0	0	0	-1.35401	0.657227	0.998587	chrX	10098579	10063445	+	6	GTAG	GGCAATATGAAGAAGCCAGAAAGAG	GGCAAAGGTCAATGGCTTTGTTATC	WWC3,
chr13 : 32535769 - 32537027 : N4BP2L2,	1.78401	0	5.07722	0	6.89883	2.71213	0	3.71549	3.48706	0	0.776216	0.658481	0.998587	chr13	32535769	32537027	-	5	GTAG	GTTCTGGGAAAACAACATTGTCTCG	TACCTTCAATTTCACCATAAGACAT	N4BP2L2,
chr4 : 102689574 - 102714561 : MANBA,	0	0	0	5.54858	0	0	0	0	2.90588	0	-1.37369	0.658787	0.998587	chr4	102689574	102714561	-	5	GTAG	CTTAAATATTGAAAAATCAGCTAAG	AGTCCCAACTAAAGGAACATTGCTC	MANBA,
chr9 : 83678441 - 83686155 : UBQLN1,	14.2721	2.61895	8.46203	0	6.89883	4.52022	0	6.50212	1.74353	9.01234	-0.435976	0.659168	0.998587	chr9	83678441	83686155	-	5	GTAG	AATGCTGAGTGCTGCACAAGAGCAG	AACGTTTAGAGATTTCTTCCTTAAA	UBQLN1,
chr1 : 243545510 - 243843282 : AKT3,	9.81205	8.72983	0	0	0	0	10.1539	0	2.90588	0	-1.08625	0.660208	0.998587	chr1	243545510	243843282	-	5	GTAG	CTGGCAAGATGTATATGATAAAAAG	TCCCACTCTCTAGTGATGACTCAGC	AKT3,
chr5 : 83537925 - 83538509 : VCAN,	0	3.49193	0	0	8.2786	0	4.23078	0	0	0	1.18864	0.662746	0.998587	chr5	83537925	83538509	-	3	CTGC	TCATCTTCTTCTGCTTCTCCAGAGC	CCTGCCTCTGTCTTTATGGAGCAGG	VCAN,
chr12 : 122340753 - 122341697 : CLIP1,	6.24403	13.0947	6.76962	17.7555	19.3167	10.8485	15.2308	9.28874	8.71764	14.6451	0.202209	0.662962	0.998587	chr12	122340753	122341697	-	5	GTAG	TGAAAAGAATGCTGAAAGTAGCAAG	GTGACTTTTCTGAAACTGTAGCCAC	CLIP1,
chr16 : 16142942 - 16141173 : ABCC1,	3.56802	0	0	0	0	0	2.53847	0	4.64941	4.50617	1.09032	0.663883	0.998587	chr16	16142942	16141173	+	6	GTAG	GCGAAAACGCATATATTTATTTTTT	TTCTCCTTTGTCCAAGACGATCACC	ABCC1,
chr6 : 143765798 - 143765261 : PHACTR2,	0	2.61895	0	0	0	3.61617	0	0	6.39294	0	1.2696	0.665418	0.998587	chr6	143765798	143765261	+	6	GTAG	GTGTTAACAGAGAAAATGCAAAATG	GTTTTTTTTGAATGAGAGGAGCCAG	PHACTR2,
chr15 : 63574403 - 63532647 : USP3,	1.78401	6.98387	0	5.54858	16.5572	0	9.30772	0	9.87999	0	0.70966	0.665995	0.998587	chr15	63574403	63532647	+	6	GTAG	AATGGACCAGTTTGTTCGTTACGAG	CAAGGGCTTTTGTTGGACCGGCACA	USP3,
chr14 : 39179462 - 39179091 : PNN,	8.92004	0	0	14.4263	0	0	0	4.64437	4.64941	10.1389	-0.854633	0.667976	0.998587	chr14	39179462	39179091	+	6	GTAG	GAAGAGTCACAGAGAAAAATGAACG	GTTCAATTTCCTGGCGCCGCTTTTG	PNN,
chr15 : 58912563 - 58916999 : SLTM,	0	3.49193	0	0	6.89883	5.42426	0	0	0	0	1.16973	0.66918	0.998587	chr15	58912563	58916999	-	5	GTAG	AGATGATACCTTTCTAACAGCCCAA	AACTCATCTGCTTCATGTTTTTTAC	SLTM,
chr1 : 171532961 - 171524821 : PRRC2C,	6.24403	3.49193	0	0	0	0	0	5.57324	1.74353	0	-1.00077	0.670874	0.998587	chr1	171532961	171524821	+	6	GTAG	GAAAGTGAAAACAGCTGTAATAAAG	AGAGGCTTTTGAACCTTGATCCTCA	PRRC2C,
chr5 : 50399107 - 50411383 : EMB,	11.5961	8.72983	6.76962	5.54858	4.1393	6.3283	8.46157	20.4352	8.71764	10.1389	0.238786	0.674223	0.998587	chr5	50399107	50411383	-	5	GTAG	TCAACGATATATGTCAGATCTAAAG	TTTTCTACTGGCATACTAGAATGTT	EMB,
chr4 : 38103157 - 38089932 : TBC1D1,	6.24403	4.36492	0	22.1943	0	0	11	11.1465	4.06823	7.8858	-0.53143	0.676244	0.998587	chr4	38103157	38089932	+	6	GTAG	CAGCATGCGATTCTTATTGACCTTG	GGAAGCTCTCCCAGCTCTGAATAAT	TBC1D1,
chr6 : 149379518 - 149342685 : TAB2,	4.46002	0	6.76962	0	0	0	3.38463	2.78662	2.90588	0	-0.831977	0.677151	0.998587	chr6	149379518	149342685	+	6	GTAG	TCTGATGATGCTGCCTACACACAAG	CAGGTCCAGGAACTGGGTCTGGAGC	TAB2,
chr11 : 121060085 - 121045674 : TBCEL,	9.81205	3.49193	0	5.54858	12.4179	5.42426	0	0	1.74353	0	-0.593332	0.678226	0.998587	chr11	121060085	121045674	+	6	GTAG	TTCCACAGGAAGAAGTGCCATTCAG	TGATCCATCTTTCTTTCTTAAAATG	TBCEL,
chr1 : 20749723 - 20773610 : HP1BP3,	4.46002	2.61895	0	0	0	0	9.30772	0	0	10.1389	0.827957	0.678523	0.998587	chr1	20749723	20773610	-	5	GTAG	CCAGGAACCAATTCTAACTATCAAA	CTTTTCTTTAGACTGATCTTTCTCA	HP1BP3,
chr14 : 73103290 - 73105978 : RBM25,	0	4.36492	0	0	0	0	0	0	2.3247	0	-1.29116	0.680654	0.998587	chr14	73103290	73105978	-	0	CTCT	TTCCCTTTCTCGTTCCCGTTCTCGC	GAGAGAGGGAACGGGAGCGAGAAAG	RBM25,
chr17 : 47143883 - 47170042 : CDC27,	0	4.36492	0	0	0	0	0	0	2.3247	0	-1.29116	0.680654	0.998587	chr17	47143883	47170042	-	5	GTAG	TACTAGTGACAGCTCCACAACCAAG	TAAGATTTGTTCCCCTTCTGCAAGC	CDC27,
chr21 : 15766141 - 15762891 : USP25,	0	4.36492	0	0	0	0	0	0	2.3247	0	-1.29116	0.680654	0.998587	chr21	15766141	15762891	+	6	GTAG	AGTGTGGGAAGCCAAGCAGATACAA	GTTGATTCAAAAACGTCTGCTGGTG	USP25,
chr10 : 71816440 - 71816860 : PSAP,	0	0	0	8.87773	0	0	0	5.57324	0	0	-1.25461	0.680683	0.998587	chr10	71816440	71816860	-	0	CAGG	GGAAGCTGTCTGTGGCCCACTTGGG	AGAGAACCCTTGGCCCCACTGATGT	PSAP,
chr2 : 231460788 - 231463287 : NCL,	0	3.49193	0	9.98744	4.1393	0	0	7.43099	0	0	-0.83364	0.680787	0.998587	chr2	231460788	231463287	-	0	CGAA	AAGTTGTTCCTGTGAAAGCCAAGAA	TACCTCCTTTGGAGGAGGAGCCATT	NCL,
chr7 : 80651845 - 80658513 : CD36,	0	0	0	4.43886	0	0	0	0	2.3247	0	-1.28726	0.681586	0.998587	chr7	80651845	80658513	-	3	CTGC	AGGCGCGACCTTAGCTCACTGCAGC	TTTTTAATTTTGTTTATTTTTTGAG	CD36,
chr9 : 86343075 - 86346480 : ZCCHC6,	0	0	0	4.43886	0	0	0	0	2.3247	0	-1.28726	0.681586	0.998587	chr9	86343075	86346480	-	5	GTAG	CATTGACATCCAGTTTCCAGCCATT	GGTCTGGACCTCTGCTTCTTGTTTT	ZCCHC6,
chrX : 148662768 - 148661908 : AFF2,	32.1122	34.0463	38.9253	28.8526	20.6965	9.04043	27.077	20.4352	75.5529	16.8981	-0.221311	0.683276	0.998587	chrX	148662768	148661908	+	6	GTAG	GTTCACCATCCTCCAAACAAGTGAA	TGGCAAGTGCATCACCTTTGTTTGT	AFF2,
chr3 : 170113360 - 170136665 : PHC3,	2.67601	5.2379	0	6.6583	0	5.42426	0	0	5.23058	3.37963	-0.634206	0.684589	0.998587	chr3	170113360	170136665	-	5	GTAG	GAGATGGAAGACATGATTGCTGAAG	GGCTGCGTAATGTTAAATTCTGAAC	PHC3,
chr12 : 66228370 - 66203714 : IRAK3,	0	5.2379	0	0	0	3.61617	2.53847	0	0	9.01234	0.894863	0.688201	0.998587	chr12	66228370	66203714	+	6	GTAG	CGGTCATCTGTGGCAGTATATCAAG	TCCAGCCAGCTGCTTGAAAGTCTCT	IRAK3,
chr7 : 105638353 - 105643121 : ATXN7L1,	0	0	0	5.54858	0	0	3.38463	0	0	0	-1.24606	0.688213	0.998587	chr7	105638353	105643121	-	5	GTAG	GACCACCCAACTCTGTACTTCCTAG	TAAACTGACTACAGGAACTGGAACA	ATXN7L1,
chr6 : 36515338 - 36540207 : STK38,	0	3.49193	0	0	0	4.52022	0	0	6.97411	0	1.11074	0.688826	0.998587	chr6	36515338	36540207	-	5	GTAG	AGACAACCTTCTTTTGGACAGCAAG	GTTGAGCCTGTCATTGCCATGGCTG	STK38,
chr6 : 13584225 - 13579451 : SIRT5,	3.56802	12.2218	0	0	0	0	0	17.6486	8.71764	16.8981	0.85242	0.689492	0.998587	chr6	13584225	13579451	+	6	GTAG	CTGAAAATGGCTCGGCCAAGTTCAA	ATATGTTAGAAAACATTTCCATTTA	SIRT5,
chr11 : 85996826 - 86007583 : PICALM,	5.35203	2.61895	0	0	0	0	0	0	0	5.63271	-1.13331	0.690495	0.998587	chr11	85996826	86007583	-	5	GTAG	TCTCAGGTAGCAAGTACATGGGGAG	TATCACCTCTGTCAATTCCAACTTG	PICALM,
chr10 : 1080476 - 1072116 : WDR37,	2.67601	0	0	0	5.51907	0	4.23078	0	0	0	1.16881	0.69341	0.998587	chr10	1080476	1072116	+	6	GTAG	CACTTACAAGGCTTCCACCAGCAAG	GTGTCCTGGTCACTCCTGCAATAAG	WDR37,
chr4 : 177360677 - 177353308 : NEIL3,	103.472	90.7902	72.7735	149.812	99.3432	82.268	92.2311	135.616	155.174	100.262	0.0883954	0.694134	0.998587	chr4	177360677	177353308	+	6	GTAG	AGAAGCACAATGTGGATTTTTTGAA	TTTTCTTCACTCTTGAGCACTGAAT	NEIL3,
chr22 : 41157408 - 41141048 : EP300,	0	7.85685	0	0	0	0	0	3.71549	1.74353	0	-1.10839	0.698353	0.998587	chr22	41157408	41141048	+	6	GTAG	CCTTGGATACTGTTGTGGCAGAAAG	CAGCTAGAAGGTGGTAGTATTCCGC	EP300,
chr13 : 45975444 - 45975838 : ZC3H13,	0	0	0	7.76801	0	0	5.07694	0	0	0	-1.18386	0.698839	0.998587	chr13	45975444	45975838	-	0	CGAG	GCGAGAACGGGAGAGAGAGCGAGAG	CGAATTGGTGAGCTTGGTCTTTGAT	ZC3H13,
chr2 : 231460828 - 231461845 : NCL,	3.56802	4.36492	0	0	4.1393	0	3.38463	0	6.97411	4.50617	0.625261	0.700305	0.998587	chr2	231460828	231461845	-	0	GAAG	GCTATGGAGACTACACCAGCCAAAG	CCCTTCTTGCCAGGTGTGGTAACTG	NCL,
chr1 : 211778918 - 211793190 : LPGAT1,	7.13603	0	0	0	0	0	6.76925	0	2.90588	9.01234	0.765696	0.700846	0.998587	chr1	211778918	211793190	-	5	GTAG	CAACAGTCACACATGTACATTACAG	TTAATATCTTCTCCCCATTCCATCA	LPGAT1,
chr18 : 50925898 - 50918110 : ME2,	5.35203	4.36492	0	0	0	0	4.23078	3.71549	0	0	-0.887585	0.702041	0.998587	chr18	50925898	50918110	+	6	GTAG	TGAAGAAGCATATACACTTACAGAG	TGTAAAATGGGTCTTTTAAGAGTGC	ME2,
chr11 : 119285566 - 119284969 : CBL,	26.7601	15.7137	11.8468	14.4263	19.3167	17.1768	27.077	21.3641	25.5717	4.50617	0.150627	0.704983	0.998587	chr11	119285566	119284969	+	6	GTAG	CACGTTCAGTCTGGATACCTCCATG	AGAATGGAGAAGGCGGCCGTTCCAC	CBL,
chr13 : 24892643 - 24913091 : CENPJ,	3.56802	0	0	0	5.51907	0	5.9231	0	0	0	1.04281	0.708779	0.998587	chr13	24892643	24913091	-	5	GTAG	GGTGGAGAAGAAGGACAAGCTTGCG	TAGAAGAGCTATTGATTTCCAACAC	CENPJ,
chr13 : 19633908 - 19646557 : MPHOSPH8,	0	0	0	7.76801	5.51907	0	0	0	0	0	-1.14136	0.708981	0.998587	chr13	19633908	19646557	-	0	CTCT	CCACCTCGAACACATCCTCTCCGTC	AAGAAAAAATTGAGGCAGAGAGAAG	MPHOSPH8,
chr13 : 46003139 - 46020557 : ZC3H13,	0	0	0	5.54858	0	0	0	3.71549	0	0	-1.14338	0.712288	0.998587	chr13	46003139	46020557	-	5	GTAG	AAAGAGAAAAGAGAGACAAGCCAAG	TATGTCTCCCTCTTGAAGATTCTTT	ZC3H13,
chr5 : 132589837 - 132579317 : RAD50,	5.35203	0	0	0	0	3.61617	0	0	0	0	-1.14281	0.712675	0.998587	chr5	132589837	132579317	+	6	GTAG	ACTGGACCAGGAGCTCATAAAAGCT	GCTCAGACTGACCTTTTCACCATGC	RAD50,
chr4 : 82930943 - 82946474 : LIN54,	4.46002	0	0	0	0	9.04043	0	0	4.06823	0	0.945971	0.714984	0.998587	chr4	82930943	82946474	-	5	GTAG	CAGCTTTAAATAGTGGAGGCGGAAA	TGGTCTGCACAGTTGATTTCACTGC	LIN54,
chr11 : 32935435 - 32931743 : QSER1,	0	0	0	3.32915	4.1393	0	3.38463	0	2.3247	0	0.968235	0.715287	0.998587	chr11	32935435	32931743	+	6	GTAG	ACTTCTGATAAAAAGAAGAAAACAG	TCAGTTGCTGCTGAGGAATGCATGC	QSER1,
chr1 : 229304000 - 229286486 : RAB4A,	5.35203	0	0	0	0	0	0	0	3.48706	0	-1.13009	0.715681	0.998587	chr1	229304000	229286486	+	6	GTAG	TTAAATGGACAACACCGTTAGATGT	ATAACCAAGAACTTAAACAAAAAAT	RAB4A,
chr17 : 74203700 - 74209259 : RPL38,	19.6241	0	0	4.43886	8.2786	0	6.76925	6.50212	0	0	-0.762835	0.716775	0.998587	chr17	74203700	74209259	-	0	ACTG	CTAGAGACACTCACAGCAAGCAGCA	GCAGCAGATACCTTTACACCCTGGT	RPL38,
chr3 : 172506753 - 172523460 : TNFSF10,	2.67601	0	0	0	0	0	4.23078	0	4.64941	0	1.07653	0.71744	0.998587	chr3	172506753	172523460	-	0	ATCT	AACATACTTTCGATTTCAGGAGGAA	AGCCCTTCCTTCTCTATTCTTTTAT	TNFSF10,
chr5 : 50797233 - 50778069 : PARP8,	6.24403	0	10.1544	7.76801	0	4.52022	3.38463	0	4.64941	14.6451	-0.387386	0.72093	0.998587	chr5	50797233	50778069	+	6	GTAG	GTTTCAAAATGGCCCTATGCTTAGG	TACATCATCAATGGCTCCATATTCC	PARP8,
chr1 : 114719579 - 114738072 : CSDE1,	2.67601	0	0	0	0	0	3.38463	0	0	5.63271	1.06768	0.721043	0.998587	chr1	114719579	114738072	-	5	GTAG	GCGCCTGTAATGTTTGGCGAGTCTG	GATGATACTTCAAATTCAACATCAT	CSDE1,
chr6 : 7189322 - 7176655 : RREB1,	2.67601	2.61895	0	0	0	4.52022	1.69231	2.78662	4.06823	0	0.685123	0.72164	0.998587	chr6	7189322	7176655	+	6	GTAG	TTACCACCAATGGGAACATGCACAG	TCCTGGAACACACAGTCGGAGCAAC	RREB1,
chr4 : 109463644 - 109462901 : SEC24B,	0	4.36492	0	5.54858	0	0	0	2.78662	1.74353	4.50617	-0.734302	0.722043	0.998587	chr4	109463644	109462901	+	6	GTAG	GCGAACAACAACCCAACCATTACTG	ACCTGCATTTGATTCTGGGCTGGAC	SEC24B,
chr7 : 158891333 - 158879684 : WDR60,	0	3.49193	0	0	8.2786	0	0	2.78662	0	0	1.00789	0.722212	0.998587	chr7	158891333	158879684	+	6	GTAG	GAGGCCGGGAGGCGAGGAAACCGTG	TGTCCTTGCTGTCTCCGTACTGCAG	WDR60,
chr12 : 69262562 - 69251129 : CPSF6,	2.67601	2.61895	5.07722	0	0	9.04043	0	8.35986	4.64941	0	0.545684	0.722658	0.998587	chr12	69262562	69251129	+	6	GTAG	GCGCGAATATCGTCATCGTTAGAAG	GATCATGCCCACCATATTCAGCTTC	CPSF6,
chr1 : 28035544 - 28058094 : EYA3,	0	0	6.76962	18.8652	5.51907	0	0	3.71549	2.3247	13.5185	-0.622463	0.724019	0.998587	chr1	28035544	28058094	-	5	GTAG	CAAACGTATGGACTACCTCCTTTTG	AGTCTCTCTCAGCAGTTTTCACAAT	EYA3,
chr3 : 170136419 - 170149244 : PHC3,	4.46002	0.872983	3.38481	3.32915	0	0	0	5.57324	5.81176	0	-0.619276	0.724053	0.998587	chr3	170136419	170149244	-	5	GTAG	AGTATTCACCAGTTAATAGCACCAG	GTGTAGGAGAAGTGGAGAGGTTGAT	PHC3,
chr5 : 123557564 - 123545417 : CSNK1G3,	7.13603	7.85685	10.1544	14.4263	5.51907	2.71213	4.23078	14.862	8.13646	15.7716	-0.207345	0.724127	0.998587	chr5	123557564	123545417	+	6	GTAG	TTCTATAAGCAGTTAGGATCTGGAG	GATGTGAGCTGATATTGATAGAGAG	CSNK1G3,
chr13 : 28037185 - 28050222 : FLT3,	0	0	6.76962	9.98744	0	0	8.46157	3.71549	4.06823	0	-0.581353	0.726514	0.998587	chr13	28037185	28050222	-	5	GTAG	AAAATGTTCACGCTGAATATAAGAA	AACAGCTGGACTTTCTTCTTTACAG	FLT3,
chr2 : 168129541 - 168140758 : STK39,	4.46002	0	0	0	0	3.61617	0	0	5.23058	3.37963	0.840928	0.727095	0.998587	chr2	168129541	168140758	-	5	GTAG	AGACATAGCCCAAAGAGCCAAAAAG	GCTAGGAACGCACTTACCCCAAAAT	STK39,
chr17 : 32368014 - 32365330 : ZNF207,	10.7041	0	0	0	0	5.42426	0	0	3.48706	0	-0.84389	0.729904	0.998587	chr17	32368014	32365330	+	6	GTAG	CCATCCAGATGAGGATATATCCCTG	GGACGTGGAACAGGTGGGGGCATAC	ZNF207,
chr1 : 116399482 - 116401596 : ATP1A1,	0	0	0	3.32915	0	0	0	5.57324	0	4.50617	1.00107	0.730719	0.998587	chr1	116399482	116401596	-	3	CTGC	CACAAGTTTGTCTGTTTTGGGATTT	TGGCCTCTTTGAAGAGACAGCCCTG	ATP1A1,
chr12 : 53298054 - 53299445 : PFDN5,	3.56802	2.61895	0	0	0	0	0	4.64437	0	0	-1.01761	0.731745	0.998587	chr12	53298054	53299445	-	0	CTTG	TCCTCTTGAAGAAGTCCTTGGCATC	AATGCCAATAAATGTGCCAGCTGGG	PFDN5,
chr10 : 96952196 - 96907265 : LCOR,	5.35203	0	0	0	0	8.13639	0	6.50212	0	0	0.834681	0.733945	0.998587	chr10	96952196	96907265	+	6	GTAG	GCTGCTCCAGTACTCAAGGGAACGG	AGCCCTTCAAGAATACTTTCAAACC	LCOR,
chr3 : 172285984 - 172247533 : FNDC3B,	5.35203	2.61895	0	0	0	0	3.38463	0	0	3.37963	-0.851726	0.735179	0.998587	chr3	172285984	172247533	+	6	GTAG	TCTTTCGGGAATAGAGAAACCACAG	GGACTCCAGTACTATCTTCAATCAC	FNDC3B,
chr12 : 22482557 - 22506819 : C2CD5,	7.13603	0	0	0	5.51907	0	0	0	0	0	-1.03551	0.735218	0.998587	chr12	22482557	22506819	-	5	GTAG	TGAAAATATGTTGATGGGCTTAGCG	CCGTCAAGGTAAAAAATGGAAATTC	C2CD5,
chr20 : 35714185 - 35725155 : RBM39,	7.13603	5.2379	11.8468	8.87773	0	10.8485	3.38463	8.35986	8.13646	10.1389	-0.227375	0.735769	0.998587	chr20	35714185	35725155	-	5	GTAG	CAGTTAATGGCAAGACTTGCAGAGG	AGGAGTTAAATTATCAATAGGTTCT	RBM39,	RP11-598P20.5
chr1 : 243613671 - 243843282 : AKT3,	19.6241	11.3488	0	4.43886	0	7.23235	11.8462	9.28874	11.6235	0	-0.410718	0.736881	0.998587	chr1	243613671	243843282	-	5	GTAG	GATGGAATATGTTAATGGGGGCGAG	TCCCACTCTCTAGTGATGACTCAGC	AKT3,
chrX : 118590302 - 118584735 : DOCK11,	0	6.11088	0	0	0	4.52022	0	0	0	0	-1.03437	0.737037	0.998587	chrX	118590302	118584735	+	6	GTAG	CCAAAATCCAGAGTTCTATGATGAG	GCCTTGAGTATCTTTGAAAATGGGT	DOCK11,
chr10 : 96949295 - 96944113 : LCOR,	0	0	0	8.87773	0	2.71213	0	0	0	4.50617	-0.897824	0.738386	0.998587	chr10	96949295	96944113	+	6	GTAG	TCTCAGTCAGAACCTAGCGAACAAG	GTTCATCCAGACCGACTAAGTGTCC	LCOR,
chr20 : 49091022 - 49074785 : CSE1L,	8.02804	2.61895	5.07722	0	0	7.23235	0	3.71549	0	5.63271	-0.513907	0.738495	0.998587	chr20	49091022	49074785	+	6	GTAG	TCCAAAACAACCAAGTTTATCAAGA	TCTTCAAATGCTTCTTCATCAGCAG	CSE1L,
chr8 : 43018494 - 42906173 : HOOK3,RP11-	2.67601	2.61895	0	9.98744	5.51907	4.52022	3.38463	0	3.48706	0	-0.459613	0.739119	0.998587	chr8	43018494	42906173	+	6	GTAG	GCCACGTGCAGCCGGCCACAGCAAG	GTGCATCCACATTAAATGTCTGGAT	HOOK3,RP11-598P20.5,
chr9 : 37147445 - 37126312 : ZCCHC7,	8.92004	0	0	0	0	0	6.76925	0	0	0	-0.985228	0.740376	0.998587	chr9	37147445	37126312	+	6	GTAG	AATATTGGCTGATGTAGAGCTATAG	TCATAAAAAGTCAGTAACCTTGAAG	ZCCHC7,
chr5 : 179720560 - 179709873 : CANX,	0	0	13.5392	0	0	8.13639	0	1.85775	0	0	-0.995938	0.740584	0.998587	chr5	179720560	179709873	+	6	GTAG	TATGATTGACAATCCCAGTTACCAG	AAGGGGTCTTGTCATGGAACTGATC	CANX,
chr4 : 48394653 - 48369849 : SLAIN2,	0	11.3488	0	6.6583	0	0	5.9231	4.64437	8.13646	0	-0.516997	0.74142	0.998587	chr4	48394653	48369849	+	6	GTAG	CTTCAAACTTCATCTACAAAAAGAG	TTTTTTCTTTGGTGATGAATACAGC	SLAIN2,
chr13 : 45975283 - 45989097 : ZC3H13,	4.46002	0	0	14.4263	5.51907	2.71213	3.38463	9.28874	0	0	-0.46096	0.746452	0.998587	chr13	45975283	45989097	-	5	GTAG	ATGGACATGATGAAAGAAAATCAAA	ATGCTGTCCTGCTGGGGAAGTAGAC	ZC3H13,
chr17 : 19958014 - 19958571 : AKAP10,	4.46002	0	0	6.6583	0	0	5.9231	1.85775	2.90588	0	-0.625039	0.746783	0.998587	chr17	19958014	19958571	-	5	GTAG	GAATTGTCAGGAAAACTAATGAAAA	GTCTGGTAGTCCAGACAAGATCTGC	AKAP10,
chr19 : 23358430 - 23362725 : ZNF91,	0	4.36492	0	4.43886	0	3.61617	5.9231	6.50212	2.90588	0	0.509385	0.748152	0.998587	chr19	23358430	23362725	-	5	GTAG	TATTTATGACCTTTTCTATGGAAAG	TCTTGAGGAAAATGAGGACATATAC	ZNF91,
chr12 : 122377389 - 122380558 : CLIP1,	5.35203	3.49193	0	0	0	0	0	3.71549	4.06823	0	-0.759478	0.749097	0.998587	chr12	122377389	122380558	-	5	GTAG	GCTCAAAATCGGAGACAGAGTATTG	AGTGAAGTCAGTCTCTGGATTAAAT	CLIP1,
chr7 : 40002031 - 39987599 : CDK13,	0	0	13.5392	14.4263	0	5.42426	5.9231	7.43099	3.48706	10.1389	-0.322234	0.749619	0.998587	chr7	40002031	39987599	+	6	GTAG	GCTTTGGATTTCAAGAAGGACAAAG	TCTGCTTCGGGATTTTCCAGACCGT	CDK13,
chr7 : 127373342 - 127377329 : ZNF800,	0	5.2379	0	0	0	7.23235	3.38463	2.78662	0	0	0.733231	0.750613	0.998587	chr7	127373342	127377329	-	5	GTAG	GTACAAGATCTAAGGCTCTTGTCTG	AAAATATGCTTAAGTTGTTTAGTTC	ZNF800,
chr1 : 151427823 - 151430841 : POGZ,	2.67601	0	0	0	0	0	1.69231	3.71549	2.3247	0	0.868002	0.751798	0.998587	chr1	151427823	151430841	-	5	GTAG	AGCGGACCTGAGTCTTCAATGAAAG	CCTTGCTGGACCAAAGGATTGCCAG	POGZ,
chr1 : 28474151 - 28473554 : PHACTR4,	0	0	0	9.98744	0	0	6.76925	0	1.74353	0	-0.795293	0.752781	0.998587	chr1	28474151	28473554	+	6	GTAG	CCATCACTATTGAAATGCTAAAAGT	CTGTTTATTGCTTGGGACAGTTCAG	PHACTR4,
chr1 : 28476291 - 28473554 : PHACTR4,	0	5.2379	0	3.32915	5.51907	0	0	0	2.3247	0	-0.757658	0.753514	0.998587	chr1	28476291	28473554	+	6	GTAG	GAAGATGAAGATGAAAGCTATCAGA	CTGTTTATTGCTTGGGACAGTTCAG	PHACTR4,
chr3 : 169988359 - 169976946 : SEC62,	11.5961	27.9355	15.2317	7.76801	15.1774	12.6566	20.3078	7.43099	24.9906	22.5309	0.132277	0.754857	0.998587	chr3	169988359	169976946	+	6	GTAG	GCCAGTATTCTTCTCCTTGCTGTTG	AAAAGACAGTCCACTGCTTTTGAAG	SEC62,
chr4 : 128936655 - 128959777 : SCLT1,	8.92004	0	0	0	0	0	0	4.64437	2.90588	0	-0.822543	0.75518	0.998587	chr4	128936655	128959777	-	5	GTAG	CAGAAATTAGAATCAATAATCTAAA	GGCTTCTTGGATTGTCACACATAAT	SCLT1,
chr4 : 152411303 - 152412529 : FBXW7,	41.9242	26.1895	28.7709	42.1692	35.8739	21.697	24.5385	37.1549	31.9647	48.4413	-0.0852174	0.755581	0.998587	chr4	152411303	152412529	-	5	GTAG	CCCATTCTATACAAAAACAACAAAA	GGCAATCTATCCTAAGGAAGTAATC	FBXW7,
chr9 : 17342444 - 17309058 : CNTLN,	4.46002	0	0	5.54858	6.89883	2.71213	0	0	0	0	-0.699763	0.755661	0.998587	chr9	17342444	17309058	+	6	GTAG	AAAACCAGGAGCTAATGATTCAAAA	AACAAATATGTAACTCATTGTAAAG	CNTLN,
chr11 : 60179501 - 60179881 : MS4A6A,	4.46002	0	5.07722	0	4.1393	0	0	4.64437	0	0	-0.715107	0.758324	0.998587	chr11	60179501	60179881	-	0	AAAA	AGTTGGGAAGGAACATTTTATACAA	CAGAGTTCAACAGTGTAGAAGTCAC	MS4A6A,
chr1 : 155853276 - 155853806 : GON4L,	12.4881	10.4758	6.76962	0	11.0381	0	7.61541	10.2176	4.06823	5.63271	-0.247964	0.765313	0.998587	chr1	155853276	155853806	-	5	GTAG	AGTGAAGAAGTCAAGGAAGAAGGAG	TTAAAAGTCCCACTTTTGTTCCATT	GON4L,
chr4 : 38118192 - 38089932 : TBC1D1,	6.24403	0	0	0	0	0	2.53847	6.50212	5.81176	0	0.645987	0.765614	0.998587	chr4	38118192	38089932	+	6	GTAG	CTGGGATTCGTAGCCAGAGTCTTTG	GGAAGCTCTCCCAGCTCTGAATAAT	TBC1D1,
chr1 : 26280156 - 26281177 : SH3BGRL3,	0	4.36492	0	0	0	0	3.38463	0	0	0	-0.928387	0.766177	0.998587	chr1	26280156	26281177	-	4	GCAG	TGCTGTAGACGCGCAGGCCGCTCAT	ACTCCATCACCACACTCCCCCCAGC	SH3BGRL3,
chr15 : 63563008 - 63532647 : USP3,	2.67601	2.61895	13.5392	4.43886	0	10.8485	11.8462	1.85775	0	2.25309	-0.321706	0.767324	0.998587	chr15	63563008	63532647	+	6	GTAG	TTTGGAAGATTATGCCAAACTTTAG	CAAGGGCTTTTGTTGGACCGGCACA	USP3,
chr6 : 149379518 - 149369909 : TAB2,	2.67601	1.74597	0	6.6583	0	0	3.38463	4.64437	3.48706	0	-0.513191	0.767377	0.998587	chr6	149379518	149369909	+	6	GTAG	TCTGATGATGCTGCCTACACACAAG	CTCATCTCTTCTGTCCAAGCATTTT	TAB2,
chr12 : 32582467 - 32564137 : FGD4,	0	0	8.46203	0	6.89883	0	0	0	0	0	-0.893172	0.767931	0.998587	chr12	32582467	32564137	+	6	GTAG	GCTGGACCAGCACCATGAGATGAAG	GCGATCTTTGGACAGGTACTGCTGC	FGD4,
chr5 : 94868333 - 94924021 : MCTP1,	0	0	0	3.32915	0	5.42426	0	3.71549	0	0	0.869604	0.768441	0.998587	chr5	94868333	94924021	-	5	GTAG	CCCAAGGAGTCTCGCTGCTTTTGTG	CAACCACTTCATTTTCTGAAAGTTC	MCTP1,
chr14 : 102209862 - 102194938 : WDR20,	3.56802	0	0	0	0	3.61617	3.38463	0	2.3247	0	0.774456	0.76962	0.998587	chr14	102209862	102194938	+	6	GTAG	CACATGGGGAAGGCCTGGTAAAGTG	CTATTGGTTTACTCAAGTCAGCAGC	WDR20,
chr16 : 53157541 - 53154447 : CHD9,	2.67601	0	0	7.76801	0	1.80809	5.9231	1.85775	1.16235	0	-0.531446	0.771452	0.998587	chr16	53157541	53154447	+	6	GTAG	AAATCACCTATGTTTACAGCGACAG	CACAAAGCTCCTTAATATTAGGGAC	CHD9,
chr21 : 37129063 - 37108392 : TTC3,	0	0	5.07722	0	0	2.71213	4.23078	4.64437	0	0	0.706874	0.771618	0.998587	chr21	37129063	37108392	+	6	GTAG	GAAACAATGAATCAGAAAAGTTCAG	TCTCTTTCCATCACCGAGTGCATTT	TTC3,
chr9 : 121166180 - 121161856 : CNTRL,	0	9.60281	10.1544	7.76801	8.2786	6.3283	5.07694	9.28874	0	5.63271	-0.258431	0.772402	0.998587	chr9	121166180	121161856	+	6	GTAG	AGACCATTTGAACCTAGCAAAACAG	AACATGTCCAGAATATTCTTTAGTT	CNTRL,
chr4 : 128091512 - 128074460 : LARP1B,	0	4.36492	0	0	0	0	0	12.0754	0	0	0.852207	0.772954	0.998587	chr4	128091512	128074460	+	6	GTAG	TTAAAGAGTATATTAAGCGTCAAAT	TTTATAATTTTGAGGGAACCGAATT	LARP1B,
chr2 : 135772547 - 135748267 : UBXN4,	8.92004	9.60281	16.9241	5.54858	13.7977	14.4647	12.6923	7.43099	11.6235	5.63271	0.142618	0.773452	0.998587	chr2	135772547	135748267	+	6	GTAG	GGGAATCTTATGCAAGAGAAAGAAG	ATCTGTGTAGACTGTTCATCATCAC	UBXN4,
chr15 : 51451645 - 51453641 : DMXL2,	8.92004	9.60281	0	6.6583	0	5.42426	2.53847	3.71549	4.06823	16.8981	-0.260435	0.773544	0.998587	chr15	51451645	51453641	-	5	GTAG	TCACCCGGAAACAGCCTCATTCATG	TGGCTTTACTGTGGCACTGCCAACT	DMXL2,
chr4 : 177360677 - 177351380 : NEIL3,	4.46002	6.98387	0	0	9.65836	0	0	0	2.3247	0	-0.582405	0.778424	0.998587	chr4	177360677	177351380	+	6	GTAG	AGAAGCACAATGTGGATTTTTTGAA	TATAGTATTTCTAGTCGGTAGCTTG	NEIL3,
chr3 : 172251541 - 172112452 : FNDC3B,	4.46002	0	0	5.54858	4.1393	5.42426	6.76925	0	0	4.50617	0.439486	0.778763	0.998587	chr3	172251541	172112452	+	6	GTAG	AAGTCGAATGATTCAGACTTGCAAG	TGGAGAACTTCCCTCAACTGGCTTC	FNDC3B,
chr2 : 55332566 - 55335164 : CCDC88A,	3.56802	0	0	6.6583	0	4.52022	0	0	0	5.63271	-0.616392	0.77966	0.998587	chr2	55332566	55335164	-	5	GTAG	ATGATGAACAAAGTACTGATGACAG	CATTTTCCTGTTCCAGTATCTTAAT	CCDC88A,
chr2 : 61186497 - 61178981 : AHSA2,	0	0	0	9.98744	0	8.13639	0	5.57324	0	11.2654	0.733188	0.780408	0.998587	chr2	61186497	61178981	+	6	GTAG	TGGAGATGTGGGAACTGGCCAGAAG	CAAGCTGGTGGCATCCCGCTCTGTC	AHSA2,
chr5 : 123575963 - 123545417 : CSNK1G3,	3.56802	0	0	4.43886	0	0	8.46157	2.78662	5.81176	0	0.510404	0.780824	0.998587	chr5	123575963	123545417	+	6	GTAG	AGCATAAACACACATTTAGGAAAAG	GATGTGAGCTGATATTGATAGAGAG	CSNK1G3,
chr11 : 13413530 - 13445181 : BTBD10,	0	0	0	4.43886	0	3.61617	0	0	0	0	-0.851731	0.784773	0.998587	chr11	13413530	13445181	-	5	GTAG	AGCACTATTAAATGTAGAGATCTCA	AAAGCACACATGTAGCACCCATAAC	BTBD10,
chr2 : 73573424 - 73572262 : ALMS1,	8.02804	0	0	0	0	0	4.23078	0	2.90588	0	-0.745119	0.784815	0.998587	chr2	73573424	73572262	+	6	GTAG	GCACACCAGAAGGAGACACATCCAG	TCAAATTCTGAATGACATTCGGACT	ALMS1,
chr11 : 35219357 - 35229365 : CD44,	0	4.36492	0	0	0	0	0	0	3.48706	0	-0.842908	0.786894	0.998587	chr11	35219357	35229365	-	0	GGAC	TTTGGGGTGTCCTTATAGGACCAGA	ACCATTATCTTGGAAAGAAACAACC	CD44,
chr3 : 53290791 - 53292827 : DCP1A,	15.1641	0	0	5.54858	0	0	0	11.1465	3.48706	6.75926	-0.547253	0.787442	0.998587	chr3	53290791	53292827	-	5	GTAG	TAAGGTGTTATCCAGTGCCATCCCG	GATGCTTGTGTCCAGATGGAGCAGA	DCP1A,
chr3 : 183762279 - 183736718 : YEATS2,	2.67601	4.36492	0	4.43886	0	2.71213	2.53847	0	2.3247	5.63271	-0.406419	0.788995	0.998587	chr3	183762279	183736718	+	6	GTAG	GTCAGCAAAGGTTCAGCCCTCCAAG	TCTGGTCAGGTGAAAAGGAGGCTCT	YEATS2,
chr12 : 82857580 - 82756983 : TMTC2,	0	0	0	8.87773	0	0	0	0	0	7.8858	-0.776743	0.789303	0.998587	chr12	82857580	82756983	+	6	GTAG	ACAGATATTACCTACCATTTACAAA	CAGAGTTTGATTTCAGGAAAACCAC	TMTC2,
chr1 : 92605307 - 92636336 : EVI5,	0	0	0	7.76801	6.89883	0	0	0	0	0	-0.807827	0.790813	0.998587	chr1	92605307	92636336	-	5	GTAG	ACACATTGCTGAGCTTGAAATCCAG	CGTTGTAGTTGGAACTGCATTTATG	EVI5,
chr10 : 16486617 - 16484337 : PTER,	0	0	0	4.43886	0	0	0	3.71549	0	0	-0.821806	0.792069	0.998587	chr10	16486617	16484337	+	6	GTAG	AAACAGTCATGTCACACCTGGATAG	GTTCTAAAAAGAGGATTTCTTTTTT	PTER,
chr11 : 32958086 - 32927157 : QSER1,	5.35203	0	0	0	0	0	0	4.64437	0	0	-0.809297	0.793226	0.998587	chr11	32958086	32927157	+	6	GTAG	CATACTAGTAGTAGTGACGATGAGG	GGGATGTCCTTCTTCATAGCTTAAA	QSER1,
chr2 : 99368545 - 99376530 : EIF5B,	0	3.49193	0	0	9.65836	0	0	0	0	0	0.809253	0.793325	0.998587	chr2	99368545	99376530	-	0	TCCT	TGGTATTTTTTTCCTCTTTTTATCT	ATGAGAAGGATTCAGGGAAGACATT	EIF5B,
chr14 : 73103229 - 73106038 : RBM25,	0	6.98387	0	0	13.7977	0	0	4.64437	0	0	0.781659	0.795713	0.998587	chr14	73103229	73106038	-	0	TTGT	CTCCGTTCTTTCTCAATTTCCTGTC	AAGAAGATGCATACGAACGAAGAAA	RBM25,
chr6 : 13639563 - 13644729 : RANBP9,	3.56802	2.61895	0	0	0	0	0	0	2.90588	11.2654	0.565832	0.799374	0.998587	chr6	13639563	13644729	-	5	GTAG	AAAGGAAGCACCGCACATTTTTCAG	GCCCCACAGTAGGATACAAATTTGG	RANBP9,
chr9 : 131147584 - 131135940 : NUP214,	3.56802	0	0	0	0	3.61617	0	0	0	5.63271	0.743666	0.799739	0.998587	chr9	131147584	131135940	+	6	GTAG	AGCGGCAAAGCCAGGCTCTCCCCAG	CGCAGATGCTGCCAGCACTAAATCC	NUP214,
chr12 : 123345258 - 123350441 : SBNO1,	2.67601	0	6.76962	0	0	8.13639	6.76925	0	3.48706	0	0.448539	0.800173	0.998587	chr12	123345258	123350441	-	5	GTAG	GCTCAGCCAGTAGCAACAGCAGCTA	GTAAATCTTGCCCTGGCTCCACCAT	SBNO1,
chr8 : 38337305 - 38348215 : WHSC1L1,	3.56802	0	8.46203	8.87773	0	1.80809	6.76925	0	2.90588	13.5185	-0.301484	0.800732	0.998587	chr8	38337305	38348215	-	5	GTAG	GTTCATACTAAAATTAACACAAGAG	TAACTTTCCCTTTCTCTCATCGGGC	WHSC1L1,
chr5 : 79669028 - 79640851 : PAPD4,	0	3.49193	0	0	0	0	0	6.50212	2.3247	0	0.724255	0.805642	0.998587	chr5	79669028	79640851	+	6	GTAG	TTAAATATTATGCTACAGAATTTGA	ATAACTCCAGTATCTGCTGACTCAA	PAPD4,
chr4 : 143543972 - 143543509 : SMARCA5,	3.56802	0	0	0	0	0	0	0	2.90588	0	-0.768349	0.807046	0.998587	chr4	143543972	143543509	+	6	GTAG	AGAAGACTATAGAGAAAAACAAAAG	TTCAGATTCTGATCCACAAGCCTCC	SMARCA5,
chr19 : 33114419 - 33113767 : GPATCH1,	3.56802	0	0	5.54858	0	3.61617	0	2.78662	0	3.37963	-0.502912	0.809007	0.998587	chr19	33114419	33113767	+	6	GTAG	TGCACCAGAATTATCCGCAAATCAG	TCTTGGTAAGCCAACTAAAGTTGAA	GPATCH1,
chr10 : 74074903 - 74070670 : VCL,	0	0	0	6.6583	0	0	0	0	5.81176	0	-0.733187	0.810574	0.998587	chr10	74074903	74070670	+	6	GTAG	GGATGAAGATGCCTGGGCCAGCAAG	AAGCTTGGTGCAAGCATTCTCAACC	VCL,
chr1 : 117420649 - 117402186 : MAN1A2,	88.3084	77.6955	49.0798	33.2915	92.4443	84.076	56.6925	56.6613	37.7764	22.5309	-0.101708	0.812625	0.998587	chr1	117420649	117402186	+	6	GTAG	AGCATATTACCTATCAGGAGAGGAG	ATTTCTCAGACGTTCTTCCTCTTCC	MAN1A2,
chr13 : 20067390 - 20051433 : ZMYM2,	7.13603	8.72983	0	4.43886	0	2.71213	0	2.78662	9.87999	10.1389	-0.271787	0.812861	0.998587	chr13	20067390	20051433	+	6	GTAG	TTACCTTTGCCTTGGAATACAGGAG	ATTTACAACAGTCACACCTTGCAGC	ZMYM2,
chr5 : 66054951 - 66021322 : ERBIN,	0	3.49193	0	0	0	0	0	0	2.90588	0	-0.74061	0.813996	0.998587	chr5	66054951	66021322	+	6	GTAG	TATTGAAGCCAAAAAGTTAGAAAAG	CAGCTGGGTCAGTCTATTCATAGTT	ERBIN,
chr3 : 47610066 - 47638780 : SMARCC1,	0	0	0	5.54858	0	0	0	0	5.81176	6.75926	0.600164	0.814497	0.998587	chr3	47610066	47638780	-	5	GTAG	CCACCACCTCATCCACCCCAGCCAG	TCCATTTTTTCCTCTTCAGCTCCTT	SMARCC1,
chr5 : 177536358 - 177539147 : FAM193B,	0	0	0	3.32915	0	4.52022	0	0	3.48706	0	0.695763	0.815534	0.998587	chr5	177536358	177539147	-	5	GTAG	CTCAGCCACTCCCTAGCACTCACAG	CAGGCTGGCTGGAGGCGGGGGGGAC	FAM193B,
chr18 : 9221999 - 9195551 : ANKRD12,	0	6.11088	11.8468	0	0	1.80809	4.23078	9.28874	0	5.63271	-0.327116	0.821178	0.998587	chr18	9221999	9195551	+	6	GTAG	TCTGATGATGATGAAAGTTACACAG	TGTAGGATGCAATCTTGTCTTTACT	ANKRD12,
chr1 : 158846003 - 158843287 : MNDA,	5.35203	3.49193	13.5392	5.54858	13.7977	0	4.23078	9.28874	10.4612	7.8858	0.166634	0.821226	0.998587	chr1	158846003	158843287	+	6	GTAG	GTATGGGTTGTTTATGTTACAAAAG	GAGCTTTTTCTTGTGTTTTAATTTT	MNDA,
chr4 : 128936655 - 128972352 : SCLT1,	4.46002	4.36492	0	0	6.89883	0	0	2.78662	0	0	-0.520173	0.821394	0.998587	chr4	128936655	128972352	-	5	GTAG	CAGAAATTAGAATCAATAATCTAAA	TTGTTCTACTTGTTTCATGGGATTG	SCLT1,
chr1 : 155415744 - 155459898 : ASH1L,	4.46002	0	0	3.32915	0	0	7.61541	0	0	0	-0.616321	0.821476	0.998587	chr1	155415744	155459898	-	5	GTAG	ATTCTGACGTTTACAAAACTACAGA	GGTTTATCAGAGGTTGGCTGGGAGC	ASH1L,
chr1 : 108699332 - 108699694 : PRPF38B,	0	0	0	8.87773	0	0	8.46157	0	0	0	-0.644283	0.821834	0.998587	chr1	108699332	108699694	-	1	ATAC	TCTAACCCCCGGTCAATACTTCGGG	AGAGAAAGGAAACACAGAAGTAGGA	PRPF38B,
chr4 : 102689574 - 102726683 : MANBA,	0	0	0	3.32915	0	0	0	0	2.3247	5.63271	0.664899	0.82423	0.998587	chr4	102689574	102726683	-	5	GTAG	CTTAAATATTGAAAAATCAGCTAAG	GGTCATTAAATCTGTAGTAAGAATC	MANBA,
chr11 : 77675036 - 77693611 : RSF1,	0	6.98387	0	0	0	4.52022	5.9231	0	0	4.50617	0.475058	0.824409	0.998587	chr11	77675036	77693611	-	5	GTAG	TCTGAGGAGAATAGTAGAGACTCTG	TATCGCAAGAGTCACACAGAAGAAT	RSF1,
chr9 : 17342444 - 17330632 : CNTLN,	0	0	0	3.32915	0	4.52022	3.38463	0	0	0	0.664447	0.824539	0.998587	chr9	17342444	17330632	+	6	GTAG	AAAACCAGGAGCTAATGATTCAAAA	TTGATAAGGATGGGCGATGAGGTAC	CNTLN,
chr6 : 30670410 - 30671274 : DHX16,	8.02804	4.36492	0	4.43886	0	0	2.53847	4.64437	12.7859	0	-0.318752	0.824859	0.998587	chr6	30670410	30671274	-	5	GTAG	GGCCGAGGAAGACCGGAAGGCCATG	TTTCTACCACTGCCTTTCGTGGTAC	DHX16,
chr2 : 229858772 - 229880128 : TRIP12,	10.7041	6.11088	3.38481	6.6583	0	8.13639	6.76925	4.64437	2.3247	14.6451	-0.173084	0.82555	0.998587	chr2	229858772	229880128	-	5	GTAG	TCTGGATTACAGGCCAAATTAGCAA	TACCCTTTCTAGACACTACCATTCA	TRIP12,
chr3 : 18378170 - 18420991 : SATB1,	1.78401	4.36492	0	0	0	0	5.9231	0	0	0	-0.647417	0.825705	0.998587	chr3	18378170	18420991	-	5	GTAG	AAAGGTTGCAGCAACCAAAAGCCAG	TACTCAGTCACTGTCTAAAGATCAC	SATB1,
chr18 : 54159765 - 54205157 : MBD2,	1.78401	6.98387	0	8.87773	5.51907	0	3.38463	9.28874	4.06823	0	-0.274353	0.827756	0.998587	chr18	54159765	54205157	-	5	GTAG	AGATGAAGCCTAAGAATATGATCAG	GCTTCTGAACTTCTTACCACTTGGA	MBD2,
chr8 : 141253989 - 141254629 : SLC45A4,	7.13603	0	0	0	0	0	3.38463	3.71549	0	0	-0.605083	0.829499	0.998587	chr8	141253989	141254629	-	5	GTAG	GTCACACCAATACTGTTGCAGATTG	AATCCCCATCGAGTGACTGGATGAT	SLC45A4,
chr4 : 128946007 - 128970468 : SCLT1,	0	2.61895	0	3.32915	0	3.61617	0	0	2.3247	0	-0.570918	0.830518	0.998587	chr4	128946007	128970468	-	5	GTAG	ATAGAATAAAACAACTTGAAACTGA	AACTCTCAGCTCTAATTTGGCTTGC	SCLT1,
chr15 : 51902036 - 51869217 : TMOD3,	0	3.49193	0	5.54858	4.1393	0	2.53847	0	3.48706	0	-0.431624	0.833624	0.998587	chr15	51902036	51869217	+	6	GTAG	GCTATAACAAAAAACAATGACTTAG	GGAACCCTGCAGGCAGAAGGGCATT	TMOD3,
chr4 : 102714438 - 102726683 : MANBA,	8.02804	0	0	0	0	0	4.23078	5.57324	2.90588	3.37963	0.386776	0.835424	0.998587	chr4	102714438	102726683	-	5	GTAG	TACTTCACATTTTCCCCAATATATG	GGTCATTAAATCTGTAGTAAGAATC	MANBA,
chr17 : 68522762 - 68525800 : PRKAR1A,R	0	3.49193	0	0	0	4.52022	0	3.71549	0	0	0.617027	0.835562	0.998587	chr17	68522762	68525800	-	0	CTAG	TCTGCAGATTCTGAATCTGTTTTGC	CAACCAGTGTTGGGGAAGGAGGGAG	PRKAR1A,RP11-120M18.2,PRKAR1A,	RP11-120M18.2	PRKAR1A
chr2 : 69509231 - 69527319 : AAK1,	0	5.2379	0	0	0	0	5.07694	0	0	0	-0.639722	0.835593	0.998587	chr2	69509231	69527319	-	5	GTAG	CTGAGGCCAGTCTCAATAAGTCCAA	TCAGGGTCTGGTTCCAACATATACC	AAK1,
chr12 : 50441643 - 50427762 : LARP4,	10.7041	0	0	0	0	0	0	7.43099	1.74353	14.6451	0.550097	0.836035	0.998587	chr12	50441643	50427762	+	6	GTAG	AACATTTCAGGGCAAGCCAATTATG	AACCAGTTCCTTTAGATGCTACCTG	LARP4,
chr18 : 20982763 - 20992937 : ROCK1,	0	4.36492	0	3.32915	0	0	3.38463	0	4.64941	0	-0.499622	0.837998	0.998587	chr18	20982763	20992937	-	5	GTAG	GCTTGAAGCTGAGCAATATTTCTCG	TCCTCTTGTAAAGATGTAATTCGAG	ROCK1,
chr20 : 17947486 - 17951595 : SNX5,	3.56802	0	0	0	0	0	3.38463	0	0	0	-0.640725	0.838332	0.998587	chr20	17947486	17951595	-	5	GTAG	CAACTTTCCGAATCTGCAAAAGAAG	TAGTATTTTTCCGCCTAACACTTAG	SNX5,
chr11 : 33287511 - 33286413 : HIPK3,	16.0561	21.8246	16.9241	15.536	17.937	14.4647	20.3078	16.7197	13.367	19.1512	-0.070803	0.838454	0.998587	chr11	33287511	33286413	+	6	GTAG	CATATCTACAATCTCGGTACTACAG	TAGACCAAGACTTGTGAGGCCATAC	HIPK3,
chr17 : 36953907 - 36952886 : AATF,	9.81205	11.3488	8.46203	13.3166	11.0381	16.2728	16.9231	4.64437	2.90588	9.01234	-0.108988	0.841168	0.998587	chr17	36953907	36952886	+	6	GTAG	GAATTTTCCAGTGCCCTGAAAAATA	CCTTCCTCATCAGATATTTCCTCAT	AATF,	AC068533.7	CRCP
chr7 : 37877007 - 37857274 : NME8,	5.35203	0	0	0	0	0	0	4.64437	6.97411	0	0.5244	0.841366	0.998587	chr7	37877007	37857274	+	6	GTAG	CCAAATCTCTTTCATGAAAGGAAAG	AAGTCACAATGTTGTCAGCTTCTGC	NME8,
chr9 : 33948374 - 33953474 : UBAP2,	5.35203	0	0	5.54858	0	0	11	3.71549	5.81176	0	0.33028	0.844225	0.998587	chr9	33948374	33953474	-	5	GTAG	CAGTCCTCAGTCCTCAGTCATCTTG	CTGGAGCAAGGCTACCAGATCAATG	UBAP2,
chr7 : 66134374 - 66127704 : CRCP,AC0685	8.92004	6.11088	0	0	11.0381	5.42426	5.07694	0	6.39294	0	0.256006	0.844305	0.998587	chr7	66134374	66127704	+	6	GTAG	CATTGAAAAGCCACAAGTTGACCAA	GAGAAGCGCAGAATTGGCATCCTTC	CRCP,AC068533.7,CRCP,
chr14 : 65455718 - 65432037 : FUT8,	0	3.49193	0	0	0	0	3.38463	0	0	0	-0.612986	0.845337	0.998587	chr14	65455718	65432037	+	6	GTAG	TTGTTGATTAACTGGACAAATTCAG	CCCCATTTGGCAATTCAGAAGGTCA	FUT8,
chr15 : 68164804 - 68141946 : PIAS1,	4.46002	0	0	7.76801	5.51907	0	0	3.71549	0	5.63271	-0.349682	0.845666	0.998587	chr15	68164804	68141946	+	6	GTAG	CCTAAGGGTTTCTCTACTATGTCCA	CGAAAGCGCTGACTGTTGTCTGATG	PIAS1,
chr14 : 73111155 - 73103192 : RBM25,	0	4.36492	0	0	0	0	0	0	0	4.50617	-0.599563	0.84696	0.998587	chr14	73111155	73103192	+	6	GTAG	AAAATAGGACTAAGTCTTAAACTGG	TTTTGCCTTTCTCTTCTTCCAGTTT	RBM25,	RP4-777O23.3	AC005154.6
chr14 : 81185531 - 81204104 : GTF2A1,	0	0	0	5.54858	0	0	0	0	0	5.63271	-0.589705	0.847922	0.998587	chr14	81185531	81204104	-	5	GTAG	TGTTGTTGTATGCCAATATGATAAG	ACTGCATTAGTTTGTTTTCCCATAA	GTF2A1,
chr5 : 83548084 - 83537007 : VCAN,	0	0	0	4.43886	0	0	0	0	0	4.50617	-0.595665	0.847954	0.998587	chr5	83548084	83537007	+	6	GTAG	TATGTTGGTGCACTTTGTGAGCAAG	ATTACACTCAAATCACTCATTCGAC	VCAN,
chr1 : 235213769 - 235234492 : ARID4B,	5.35203	0	0	0	0	0	0	0	5.23058	0	-0.587082	0.848716	0.998587	chr1	235213769	235234492	-	5	GTAG	TGCATTACTGCGGATGGAATGTGAG	CATCACTACAATCAGGACAAACCAC	ARID4B,
chr12 : 82857580 - 82857010 : TMTC2,	12.4881	3.49193	0	0	0	4.52022	0	4.64437	15.1106	4.50617	0.249937	0.848758	0.998587	chr12	82857580	82857010	+	6	GTAG	ACAGATATTACCTACCATTTACAAA	GTCCTGATTAGTCTTGATAGCACGG	TMTC2,
chr9 : 33971651 - 34017189 : UBAP2,	4.46002	0	0	0	0	0	3.38463	6.50212	0	0	0.53617	0.849236	0.998587	chr9	33971651	34017189	-	5	GTAG	CAGAATGGTGCAGATGAGGGAACTG	ATAATGTATGTACAAAATAGAAAAT	UBAP2,
chr18 : 56939393 - 56923922 : WDR7,	3.56802	0	0	0	0	0	2.53847	0	0	5.63271	0.56521	0.849502	0.998587	chr18	56939393	56923922	+	6	GTAG	AAGAATGTTTCCCAGCCATCTGCAG	AGCAGAAGAAACGTCAGTGCCTTGC	WDR7,
chr14 : 99458279 - 99465813 : SETD3,	5.35203	10.4758	6.76962	0	0	0	15.2308	7.43099	4.64941	0	-0.298834	0.850185	0.998587	chr14	99458279	99465813	-	5	GTAG	CGCCTACTTCTATAAAGTCATCCAG	CGACTCTTCTTACCCATTTTTCTGA	SETD3,
chr1 : 246540938 - 246551302 : TFB2M,	0	0	0	7.76801	0	0	0	2.78662	5.23058	0	-0.509346	0.850282	0.998587	chr1	246540938	246551302	-	5	GTAG	AAAACTCACATCCTTTCAGCAGAAG	GATTTCCGGGATCTGCCATTAGTTT	TFB2M,
chr7 : 30550636 - 30574881 : AC005154.6,	3.56802	0	0	3.32915	0	0	0	0	6.97411	0	-0.53259	0.850899	0.998587	chr7	30550636	30574881	-	5	GTAG	CAGTAACCCTGTGTTCTATCCACAG	GGCTTCAGTTATTGCAGGCTGGACC	AC005154.6,RP4-777O23.3,AC005154.6,
chr18 : 46890580 - 46903635 : PIAS2,	6.24403	0	0	9.98744	4.1393	0	9.30772	6.50212	0	0	-0.303696	0.850959	0.998587	chr18	46890580	46903635	-	5	GTAG	GTTCTCATCAAGCCCACGAGTTTAG	AGGGATGTAAAATGGTACAGCCACT	PIAS2,
chr4 : 73085249 - 73092300 : ANKRD17,	20.5161	14.8407	11.8468	16.6457	17.937	16.2728	27.077	7.43099	10.4612	13.5185	-0.0759114	0.851689	0.998587	chr4	73085249	73092300	-	5	GTAG	ACTCCGTGTTCATCAGCATCAAATG	TTGTCTTGTTGATTCAGTGCCACCC	ANKRD17,
chr15 : 68173892 - 68141946 : PIAS1,	8.92004	0	0	5.54858	0	3.61617	0	7.43099	6.39294	0	-0.31031	0.8518	0.998587	chr15	68173892	68141946	+	6	GTAG	CATATGAACACCTTATTATTGATGG	CGAAAGCGCTGACTGTTGTCTGATG	PIAS1,
chr3 : 122337545 - 122341630 : CSTA,	5.35203	0	0	4.43886	0	0	0	4.64437	0	6.75926	-0.393146	0.8562	0.998587	chr3	122337545	122341630	-	0	AATT	TTTTCTTCAAGCTGTGGTTTAACCT	TACTGAGTCATGATCCTTGCTGATA	CSTA,
chr18 : 50940386 - 50918110 : ME2,	7.13603	0	0	0	0	3.61617	3.38463	3.71549	0	3.37963	0.357086	0.857214	0.998587	chr18	50940386	50918110	+	6	GTAG	AGTTTCTATTAACATTGCTATTAAA	TGTAAAATGGGTCTTTTAAGAGTGC	ME2,
chr3 : 49360307 - 49375509 : RHOA,	7.13603	0	0	0	4.1393	0	0	3.71549	0	0	-0.494367	0.858372	0.998587	chr3	49360307	49375509	-	0	AGAA	TTTGGGTACATGGAGTGTTCAGCAA	CACATACACCTCTGGGAACTGGTCC	RHOA,
chr12 : 69353331 - 69353997 : LYZ,	3.56802	0	0	0	0	0	0	0	3.48706	0	-0.555246	0.859482	0.998587	chr12	69353331	69353997	-	0	TATT	AGGCCATATTTTGCTCCTGCTTCTG	TTTGTTGGGCAATATGAAATTTTTA	LYZ,
chr16 : 53157541 - 53141179 : CHD9,	8.02804	6.11088	8.46203	5.54858	11.0381	6.3283	5.9231	3.71549	7.55529	4.50617	-0.114184	0.859544	0.998587	chr16	53157541	53141179	+	6	GTAG	AAATCACCTATGTTTACAGCGACAG	TAACAGTACTGGTCTCAAAAAATGA	CHD9,
chr1 : 58506060 - 58539310 : OMA1,DAB1,O	13.3801	0	6.76962	0	11.0381	0	3.38463	0	10.4612	12.392	0.299748	0.860209	0.998587	chr1	58506060	58539310	-	5	GTAG	GTACTTGGATAGACTTATACCTCAG	GAAGCTCATTTTTTCACTTGACTAC	OMA1,DAB1,OMA1,
chr2 : 159337462 - 159395834 : BAZ2B,	8.02804	3.49193	0	0	0	0	0	12.0754	0	0	-0.52712	0.860838	0.998587	chr2	159337462	159395834	-	5	GTAG	CATCCGTTAGTGGTGATGGTGACGG	TGTGTTGTCGCCTTCGCTCTCGTTC	BAZ2B,	DAB1	OMA1
chr11 : 65502910 - 65503548 : AP000769.	3.56802	2.61895	0	0	6.89883	0	0	0	0	0	-0.507331	0.86115	0.998587	chr11	65502910	65503548	-	0	TGTT	GTATTTCTCATCAATTCATTATTTT	GCTGTTAGAATCAGATGTTACTGCT	AP000769.1,
chr10 : 7802854 - 7797047 : ATP5C1,	10.7041	6.11088	0	4.43886	5.51907	6.3283	3.38463	12.0754	0	10.1389	0.160723	0.861498	0.998587	chr10	7802854	7797047	+	6	GTAG	AAATTATCTCTGGTGCTGCAGCTCT	TTGATGGACTTTAGTCTCCTGGTGA	ATP5C1,
chr1 : 186341028 - 186344090 : TPR,	0	3.49193	0	0	4.1393	0	0	3.71549	0	0	0.521957	0.861649	0.998587	chr1	186341028	186344090	-	5	GTAG	CAAACGTTGGAAAGCACGTAACCAG	GACATACACATTTGGAAACTTCATC	TPR,
chr9 : 85618983 - 85633374 : AGTPBP1,	3.56802	5.2379	8.46203	4.43886	0	12.6566	7.61541	4.64437	4.06823	5.63271	0.141188	0.862449	0.998587	chr9	85618983	85633374	-	5	GTAG	AAGTCCAACAGTCAGTTTAATTATG	GTTCTTTGGAGATTAAATCATAGTC	AGTPBP1,
chr9 : 85669485 - 85712566 : AGTPBP1,	8.02804	0	0	0	0	4.52022	0	0	0	4.50617	-0.44488	0.865135	0.998587	chr9	85669485	85712566	-	5	GTAG	GTAAGAAGAATTCCAGTCTTATAAA	ACTTCATTTCATAATTGCAGATAAT	AGTPBP1,
chr1 : 153373806 - 153375582 : S100A12,	0	0	0	5.54858	5.51907	0	5.9231	0	0	0	0.442217	0.865403	0.998587	chr1	153373806	153375582	-	0	ACTT	GTAGGTAGCTCTCTGAAGGCTTTTT	ATGCACAGGAATGTGGAGCTACAGC	S100A12,
chr9 : 109050283 - 109064567 : TMEM245,	0	4.36492	0	0	0	0	0	4.64437	0	0	-0.522119	0.866368	0.998587	chr9	109050283	109064567	-	5	GTAG	GCCAGTCTGTGGAAGAAGCTATCAG	GACTACCTGAGCCTCAGGAAGCCAA	TMEM245,
chr1 : 92563642 - 92636336 : EVI5,	0	3.49193	0	0	0	0	0	0	3.48706	0	-0.527507	0.866518	0.998587	chr1	92563642	92636336	-	5	GTAG	TCAGATAGCAGAGCTGAATCATGAG	CGTTGTAGTTGGAACTGCATTTATG	EVI5,
chr9 : 379935 - 370230 : DOCK8,	0	3.49193	0	0	0	0	0	0	3.48706	0	-0.527507	0.866518	0.998587	chr9	379935	370230	+	6	GTAG	GTGCAAAGGGATGTGCCCAAGTCAG	GCCCGCTGGATTTTCCAAAGATGAC	DOCK8,
chr2 : 37316237 - 37317179 : PRKD3,	8.92004	10.4758	6.76962	0	0	8.13639	6.76925	11.1465	5.81176	11.2654	0.131198	0.86723	0.998587	chr2	37316237	37317179	-	5	GTAG	TGTGTGCTCCATAGTTTATCAAAAG	TGATGCTTTCTGACATATAGTTAGC	PRKD3,
chr14 : 73103266 - 73105950 : RBM25,	0	0	0	4.43886	0	0	0	4.64437	0	0	-0.518221	0.867366	0.998587	chr14	73103266	73105950	-	0	CTCT	CCTTTCTCGTTCCCTTTCACGCTCC	GAACGAGAACGGGAGCGAGAGAGAG	RBM25,
chr6 : 130104575 - 130022227 : L3MBTL3,	0	0	0	4.43886	0	0	0	4.64437	0	0	-0.518221	0.867366	0.998587	chr6	130104575	130022227	+	6	GTAG	AAAGCTCTTCTTCCCCTGAAATCAG	ACTCTCAAGATTTCTCCTAAGGGTT	L3MBTL3,
chr4 : 53444103 - 53425872 : FIP1L1,	5.35203	0	0	0	0	6.3283	0	0	4.64941	0	0.439323	0.868852	0.998587	chr4	53444103	53425872	+	6	GTAG	GCACGTGCATTTCCATATGGCAATG	AACATCAATTGCCCCAGGTAATCTC	FIP1L1,
chr3 : 105693494 - 105704173 : CBLB,	3.56802	0	0	0	0	0	0	0	0	7.8858	0.507654	0.869667	0.998587	chr3	105693494	105704173	-	5	GTAG	TTACCACCCTCCTCCCTAGCATAAA	CTGGTGAGTTCTGCCTGTCAGTGCA	CBLB,
chr1 : 172570730 - 172555869 : SUCO,	0	3.49193	0	0	0	0	0	3.71549	0	0	-0.510299	0.870802	0.998587	chr1	172570730	172555869	+	6	GTAG	TGAATCCTTGCAGCACTAAAATTTG	GACTTAACTTTTTTGACTCTGTATT	SUCO,
chr15 : 32964107 - 32969477 : FMN1,	0	0	0	3.32915	0	0	3.38463	0	3.48706	0	0.484232	0.872056	0.998587	chr15	32964107	32969477	-	5	GTAG	TGAGAAGAAAAACAAGGTCAAAAAG	GAAATGCCCGAAGTTCAAACTGTGC	FMN1,
chr2 : 71418639 - 71396141 : ZNF638,	4.46002	2.61895	0	0	0	4.52022	0	3.71549	0	0	-0.389063	0.875563	0.998587	chr2	71418639	71396141	+	6	GTAG	ATGACCCAGAATTAGAAAAAGAAAG	GATGCCTTGGCTTGTCCAGTTTTGG	ZNF638,
chr11 : 85996826 - 86031611 : PICALM,	7.13603	6.11088	10.1544	3.32915	11.0381	6.3283	3.38463	3.71549	6.97411	5.63271	-0.107308	0.876064	0.998587	chr11	85996826	86031611	-	5	GTAG	TCTCAGGTAGCAAGTACATGGGGAG	ATCTCATTTGTGCACTGAATTAAGT	PICALM,
chr15 : 65715478 - 65761438 : DENND4A,	0	0	0	5.54858	0	0	5.9231	0	0	0	-0.4786	0.876145	0.998587	chr15	65715478	65761438	-	5	GTAG	ATTTTTTGATGATTGTGTAGATAAA	CGCAGCCTCAGAGTTTGAGAAATAA	DENND4A,
chr15 : 80122800 - 80098416 : ZFAND6,	0	2.61895	13.5392	0	0	5.42426	0	4.64437	4.06823	5.63271	-0.2244	0.879341	0.998587	chr15	80122800	80098416	+	6	GTAG	GTACCTGAAACAGAAGATGTGCAGG	ACTGCAGCAGACTTCAGATTCATTC	ZFAND6,
chr6 : 158589782 - 158573420 : TMEM181,	3.56802	0	6.76962	0	0	0	3.38463	6.50212	2.3247	0	-0.289473	0.880327	0.998587	chr6	158589782	158573420	+	6	GTAG	CCCCATCAAGGGAATGAACTTCACA	CGTGTAGAGCCGCATGGGCGCCAGC	TMEM181,
chr11 : 85990250 - 86031611 : PICALM,	6.24403	0	0	0	0	0	0	3.71549	0	3.37963	-0.432406	0.880664	0.998587	chr11	85990250	86031611	-	5	GTAG	ACACCTACTCATGAAATGTTTGTTG	ATCTCATTTGTGCACTGAATTAAGT	PICALM,
chr3 : 170113360 - 170149244 : PHC3,	0	4.36492	0	0	0	0	0	0	4.64941	0	-0.463904	0.881047	0.998587	chr3	170113360	170149244	-	5	GTAG	GAGATGGAAGACATGATTGCTGAAG	GTGTAGGAGAAGTGGAGAGGTTGAT	PHC3,
chr17 : 27309272 - 27303367 : WSB1,	2.67601	0	0	6.6583	0	6.3283	0	4.64437	2.3247	3.37963	0.244324	0.882437	0.998587	chr17	27309272	27303367	+	6	GTAG	ATGGAGACATTCTGATGGAATTTGG	AACATTCTTGGTGCCATGCAAGAGA	WSB1,
chr7 : 105078963 - 105073619 : KMT2E,	4.46002	0	0	0	0	5.42426	0	3.71549	0	0	0.422643	0.882937	0.998587	chr7	105078963	105073619	+	6	GTAG	GCGGTCTTGTACACCCAATGCAGAG	CACTGCCCTCTCTTTATCCAAATTC	KMT2E,
chr1 : 41046407 - 41075451 : SCMH1,	3.56802	0	0	0	0	0	0	0	2.90588	4.50617	0.439149	0.883167	0.998587	chr1	41046407	41075451	-	5	GTAG	CACAGCCACGACAGGTACCTACCAG	GGATAGGGATTCTTTGGAATCACAA	SCMH1,
chr4 : 128936655 - 129003876 : SCLT1,	9.81205	16.5867	18.6165	18.8652	19.3167	19.889	14.3847	20.4352	19.1788	4.50617	0.0582314	0.88451	0.998587	chr4	128936655	129003876	-	5	GTAG	CAGAAATTAGAATCAATAATCTAAA	AGCATCTTTTAATTCACTGTGCAAC	SCLT1,
chr1 : 45659028 - 45661225 : GPBP1L1,	3.56802	0	0	0	0	0	1.69231	3.71549	1.74353	0	0.394256	0.88516	0.998587	chr1	45659028	45661225	-	5	GTAG	TTTCTCAACACCACAGTCAGCTAAG	TGAAAGGCCACACGAATCTATCACT	GPBP1L1,
chr7 : 92327900 - 92294889 : ANKIB1,	10.7041	2.61895	0	0	0	4.52022	0	0	5.81176	6.75926	-0.245134	0.885423	0.998587	chr7	92327900	92294889	+	6	GTAG	GCTGAAGCTTTACTTCGAGCTCATG	ACACTTCTGCAACATCTTTCACATT	ANKIB1,
chrX : 37780068 - 37792054 : CYBB,	2.67601	0	0	3.32915	0	1.80809	0	3.71549	1.16235	4.50617	0.287889	0.885819	0.998587	chrX	37780068	37792054	-	5	GTAG	AGCCCAGTTCCCCATGGTGGCAGAG	TGGTGGCATGGATGATTGCACTTCA	CYBB,
chr5 : 79623489 - 79619612 : PAPD4,	5.35203	0	0	0	0	0	0	0	5.81176	0	-0.439947	0.88612	0.998587	chr5	79623489	79619612	+	6	GTAG	CACACTGCCTGAGGCCAAAGATAAG	TGGAAGTGAACATGTATTCTTCTAC	PAPD4,
chr12 : 69353866 - 69354203 : LYZ,	0	4.36492	5.07722	0	6.89883	0	0	4.64437	0	0	-0.308956	0.888303	0.998587	chr12	69353866	69354203	-	0	TATG	ATCTATTTAAGATAACCTTTTCTTA	GAAGTTATGCATGATGTAAAAAATA	LYZ,
chr8 : 132727798 - 132757294 : TMEM71,	2.67601	3.49193	0	0	0	0	0	0	1.74353	5.63271	-0.362423	0.889161	0.998587	chr8	132727798	132757294	-	5	GTAG	CAAGAGAATAGTTCGGATCATTCAG	TATTCTCTTTCCAACCTGGAAGAAC	TMEM71,
chr5 : 39201826 - 39202987 : FYB,	0	2.61895	0	11.0972	0	2.71213	3.38463	4.64437	5.81176	6.75926	0.181208	0.889931	0.998587	chr5	39201826	39202987	-	5	GTAG	TTCCACAAAACCTCTTCTGGAAACA	GGGACTTTACATCTGCCTTTCCATC	FYB,
chr7 : 77627675 - 77607235 : PTPN12,	2.67601	7.85685	0	2.21943	0	12.6566	0	3.71549	0	0	-0.244528	0.89022	0.998587	chr7	77627675	77607235	+	6	GTAG	ACAACACATTCAGGTGCTGAAAAAG	GGCACCTGTTCTTCCACAGCCTGCA	PTPN12,
chr11 : 45965315 - 45979966 : PHF21A,	0	0	0	13.3166	12.4179	0	0	2.78662	0	0	-0.413507	0.890267	0.998587	chr11	45965315	45979966	-	5	GTAG	TAGCAAGCCAAGTCTTGAAAAACAG	TCCGTAGCTGTTCAACTACTCTTTT	PHF21A,
chr4 : 87047594 - 87046166 : AFF1,	10.7041	20.0786	10.1544	13.3166	20.6965	17.1768	12.6923	14.862	11.6235	10.1389	0.0554902	0.891164	0.998587	chr4	87047594	87046166	+	6	GTAG	GAAGATGCCTTCTCAGTCAGTTGAG	CAGGTTTCTGTCGTCATTGTACAAA	AFF1,
chr15 : 49916934 - 49934182 : ATP8B4,	28.5441	6.98387	0	24.4138	0	11.7526	12.6923	10.2176	18.0165	29.2901	-0.141181	0.891223	0.998587	chr15	49916934	49934182	-	5	GTAG	CTGTGGAAGTGAGAGAAGAACTCAG	CTGAGAAATCCACAGGCTCTTTTTC	ATP8B4,
chr1 : 52515891 - 52526373 : ZCCHC11,	3.56802	0	0	0	0	0	4.23078	0	2.90588	0	0.405048	0.892145	0.998587	chr1	52515891	52526373	-	5	GTAG	AGATCACATCTTTCGACTTGAAAAA	TTCAAGTCCAGTTTAGGCAAGCAAA	ZCCHC11,
chr20 : 44503815 - 44510028 : SERINC3,	0	3.49193	0	0	0	0	0	0	6.97411	0	0.418111	0.892691	0.998587	chr20	44503815	44510028	-	5	GTAG	TTGTTCTCTGCCTCTTGTATTCTAG	CCTATCATGCCAACAACAAACCAGA	SERINC3,
chr3 : 152447773 - 152445282 : MBNL1,	0	3.49193	0	0	0	0	0	0	6.97411	0	0.418111	0.892691	0.998587	chr3	152447773	152445282	+	6	GTAG	CAGCATACAGCATTTCTCCCACCAG	TGCCACGTTGGTACTCTCGACATAC	MBNL1,
chr5 : 179710065 - 179705679 : CANX,	0	2.61895	0	4.43886	4.1393	0	3.38463	0	0	5.63271	0.270742	0.894684	0.998587	chr5	179710065	179705679	+	6	GTAG	AAGAAAACACATCTTTACACACTAA	ACAGCAACCACTTCCCTTCCATGAT	CANX,
chr13 : 114052052 - 114057474 : RASA3,	4.46002	0	0	0	0	0	5.07694	0	0	0	-0.409597	0.894707	0.998587	chr13	114052052	114057474	-	5	GTAG	GTTTTCCGGAGGGATTCCATCATAG	TTTCAAGGAAAGCTGGAGCCAGTCT	RASA3,
chr8 : 100709133 - 100713181 : PABPC1,	0	3.49193	0	0	0	0	0	3.71549	0	3.37963	0.390372	0.896829	0.998587	chr8	100709133	100713181	-	5	GTAG	ACTGCTCAGGGTGCCAGACCTCATC	ATTACTTTCACACTTAAGGCAGGCC	PABPC1,
chr7 : 27800090 - 27785163 : TAX1BP1,	8.02804	0	0	2.21943	0	6.3283	0	0	2.3247	4.50617	-0.244567	0.897551	0.998587	chr7	27800090	27785163	+	6	GTAG	AGCTGAAGTACAGGACAATTATAAA	AGCTTTGTGTTACTTCAGTAAGACC	TAX1BP1,
chr14 : 34792775 - 34862322 : BAZ1A,	3.56802	0	0	0	0	0	0	0	6.97411	0	0.390372	0.899707	0.998587	chr14	34792775	34862322	-	5	GTAG	CAACTAACTGATGCTGACACCAAAG	CAGAATGGTTCGTTCAAAAAAGTCA	BAZ1A,
chr2 : 195683906 - 195680032 : SLC39A10,	0	0	0	4.43886	0	2.71213	0	0	2.3247	0	-0.372557	0.90119	0.998587	chr2	195683906	195680032	+	6	GTAG	GATGAGGCAAATATAGGGGCATCAG	ATATGTACCTTCATTTCTATTTTTC	SLC39A10,
chr3 : 172251541 - 172247533 : FNDC3B,	60.6563	26.1895	47.3874	47.7178	31.7346	52.4345	44.0001	39.0127	59.8611	47.3148	0.0303259	0.904257	0.998587	chr3	172251541	172247533	+	6	GTAG	AAGTCGAATGATTCAGACTTGCAAG	GGACTCCAGTACTATCTTCAATCAC	FNDC3B,
chr1 : 150732189 - 150732750 : CTSS,	0	0	0	6.6583	0	0	0	0	0	7.8858	-0.360428	0.905829	0.998587	chr1	150732189	150732750	-	3	CTGC	AAACGCCACGTGTAGTGGCTCATGC	GCCTCCCAAGTAGCTGGGATTACAG	CTSS,
chr6 : 53268095 - 53268430 : ELOVL5,	3.56802	0	0	0	0	0	4.23078	0	0	0	-0.35393	0.909891	0.998587	chr6	53268095	53268430	-	0	AAAA	ATGTGCCTAGTTTACCAAAATTAAC	CGACTGCTGTAGAGCCCCCCCCTTT	ELOVL5,
chr10 : 89762835 - 89738958 : KIF20B,	9.81205	2.61895	6.76962	0	0	14.4647	0	13.9331	0	4.50617	0.19554	0.909996	0.998587	chr10	89762835	89738958	+	6	GTAG	GAGGAAGAGTAATGAAATGGAGGAG	GCTTGCAGAGAGTTCCTCTTTCAAT	KIF20B,
chrX : 118776511 - 118741017 : IL13RA1,	5.35203	3.49193	0	0	0	2.71213	0	0	12.7859	0	0.228781	0.911225	0.998587	chrX	118776511	118741017	+	6	GTAG	TGGAGACCAGAATGATGATACTCTG	AAATTTGTCACAGGTGGCTGAGTTT	IL13RA1,
chr18 : 9211784 - 9182382 : ANKRD12,	0	0	0	4.43886	5.51907	0	0	0	0	0	-0.334887	0.913831	0.998587	chr18	9211784	9182382	+	6	GTAG	AATGTGAATGTGAAAGATTTTGCAG	TTTTATCAGTCTTCTCATCCTGGAT	ANKRD12,
chr13 : 19633902 - 19646551 : MPHOSPH8,	0	0	16.9241	0	0	0	4.23078	15.7909	0	0	-0.321988	0.914116	0.998587	chr13	19633902	19646551	-	0	ACTC	CGAACACATCCTCTCCGTCCTCCTC	AAGAAAAAGAAAAAATTGAGGCAGA	MPHOSPH8,
chr1 : 111148053 - 111147642 : CEPT1,	5.35203	0	0	0	0	0	10.1539	0	0	0	0.323587	0.914433	0.998587	chr1	111148053	111147642	+	6	GTAG	CTACTGCCCTACAGCTACAGAGCAG	GTAGGTTTTTGTGGCTGGTGCTTAC	CEPT1,
chr4 : 53453133 - 53425872 : FIP1L1,	0	0	0	5.54858	6.89883	0	0	0	0	0	-0.322916	0.9161	0.998587	chr4	53453133	53425872	+	6	GTAG	GTCCTACACCAAGTGTTTTCAACAG	AACATCAATTGCCCCAGGTAATCTC	FIP1L1,
chr1 : 42265115 - 42278784 : FOXJ3,	2.67601	1.74597	0	0	0	4.52022	0	3.71549	0	0	0.279486	0.916593	0.998587	chr1	42265115	42278784	-	5	GTAG	TCGATCTAAGGATGACCCTGGAAAG	AAGTGAGGGAAAGCCTGAGTTACAT	FOXJ3,
chr12 : 32611283 - 32598497 : FGD4,	5.35203	6.98387	5.07722	7.76801	0	7.23235	4.23078	3.71549	9.87999	10.1389	-0.0786689	0.917979	0.998587	chr12	32611283	32598497	+	6	GTAG	AGCACAAGAACGCTACCTTTTCTTA	TGTGAAGTTTTTGCTCATTAGTCTC	FGD4,
chr9 : 33948374 - 33956146 : UBAP2,	0	9.60281	0	0	0	0	3.38463	9.28874	4.06823	0	0.198141	0.919908	0.998587	chr9	33948374	33956146	-	5	GTAG	CAGTCCTCAGTCCTCAGTCATCTTG	CAGTGAAGACCTTTGTTTCAGAAAG	UBAP2,
chr1 : 113834910 - 113855049 : PTPN22,	11.5961	4.36492	0	15.536	13.7977	15.3687	4.23078	7.43099	5.23058	5.63271	0.0675159	0.920001	0.998587	chr1	113834910	113855049	-	5	GTAG	TCATTTATTGTGGTTGAGGAAGCTG	GAAACTGGTAGATAGTTCGAGTTTC	PTPN22,
chr14 : 96565214 - 96542243 : PAPOLA,	0	3.49193	0	0	0	0	0	0	0	6.75926	0.310225	0.92036	0.998587	chr14	96565214	96542243	+	6	GTAG	AATCAGCACTTGATCGGAAGTCCAG	ACTTGCTAGAAGTACAATATAATGC	PAPOLA,
chr5 : 83522834 - 83519349 : VCAN,	0	0	0	4.43886	0	0	3.38463	2.78662	1.74353	0	0.265111	0.920947	0.998587	chr5	83522834	83519349	+	6	GTAG	GTGTGGTGGGTAATAGGTCTCTAAT	AAATCGATGGTTGTAGCCTCTTTAG	VCAN,
chr18 : 9950568 - 9931810 : VAPA,	3.56802	5.2379	0	4.43886	0	6.3283	5.9231	5.57324	4.06823	0	0.127609	0.921218	0.998587	chr18	9950568	9931810	+	6	GTAG	ATCAGAAGAAAATCGGCACCTGAGA	GTAGTGACTACATCTGTGAAGGGGC	VAPA,
chr17 : 67964404 - 67945409 : BPTF,	4.46002	0	0	0	0	0	0	0	0	5.63271	-0.300356	0.922572	0.998587	chr17	67964404	67945409	+	6	GTAG	GAAGAGGGTGCTCCGTTCCTTACAG	TTACTCTGCCTTTGTTCACCTGTAC	BPTF,
chr5 : 66054951 - 66053406 : ERBIN,	7.13603	5.2379	11.8468	7.76801	4.1393	9.94448	8.46157	7.43099	7.55529	6.75926	-0.0569428	0.922928	0.998587	chr5	66054951	66053406	+	6	GTAG	TATTGAAGCCAAAAAGTTAGAAAAG	GCTGTTAAAATTTTCATCTTCTTGC	ERBIN,
chr7 : 11022979 - 10982372 : PHF14,	0	0	6.76962	0	8.2786	0	0	0	0	0	-0.291438	0.923784	0.998587	chr7	11022979	10982372	+	6	GTAG	GAACTATTCCAAATATGGTGCCAAG	CTTCCATTACCACTCCCTTCAGAAT	PHF14,
chr11 : 94429911 - 94461036 : MRE11A,	0	4.36492	0	0	0	5.42426	0	0	0	0	-0.295019	0.924007	0.998587	chr11	94429911	94461036	-	5	GTAG	AGGGGTTGATTTTGAATCAAGTGAG	AGTTTCCCAAAGTTGATCTCTTCTC	MRE11A,
chr7 : 10983159 - 10982372 : PHF14,	5.35203	0	0	0	6.89883	0	0	0	0	0	-0.292425	0.924033	0.998587	chr7	10983159	10982372	+	6	GTAG	CCTATCTCAAAGCAAGAGTAATGAG	CTTCCATTACCACTCCCTTCAGAAT	PHF14,
chr9 : 15460313 - 15457960 : SNAPC3,	6.24403	0	0	0	5.51907	0	5.9231	0	0	0	0.246455	0.924196	0.998587	chr9	15460313	15457960	+	6	GTAG	CACCTTCTACCATGAGGCTTCCAAG	CAAGCAGTCATCATGATGCACAAGC	SNAPC3,
chr14 : 88437903 - 88416711 : SPATA7,	0	0	0	4.43886	0	5.42426	0	0	0	0	-0.291122	0.925013	0.998587	chr14	88437903	88416711	+	6	GTAG	AGGCTGCACATCGGAGGAAAACTCG	TTCTCTCTTCGTTGTTGGTCTGCAT	SPATA7,
chr10 : 43158931 - 43154897 : CSGALNACT	5.35203	4.36492	0	7.76801	0	3.61617	5.07694	12.0754	5.23058	2.25309	0.0936583	0.927133	0.998587	chr10	43158931	43154897	+	6	GTAG	TTGTACAATTTATGCAGAACTTCAG	ATCCATTATATTGGTAGTGATTTTT	CSGALNACT2,
chr3 : 56618212 - 56615128 : CCDC66,	0	3.49193	0	0	0	0	0	0	0	4.50617	-0.28416	0.927596	0.998587	chr3	56618212	56615128	+	6	GTAG	ATATTCATTCATTCAGCAAGGAAAG	CATTTGTCTTGAGAGTCATGATTTC	CCDC66,
chr10 : 21735235 - 21730900 : MLLT10,	6.24403	0	0	0	0	0	0	5.57324	2.3247	0	-0.25457	0.927937	0.998587	chr10	21735235	21730900	+	6	GTAG	GTTAAATTCTCAACAGCTCACACCA	AATCTGTAAGCTGCTTACAGGGGAT	MLLT10,
chr15 : 40650819 - 40628070 : CASC5,	9.81205	9.60281	5.07722	6.6583	8.2786	12.6566	3.38463	5.57324	13.367	5.63271	0.0539118	0.929133	0.998587	chr15	40650819	40628070	+	6	GTAG	TGTTTCTCAAGCTTGAATACTACCA	CCTCTTCAGTATGGTGATCAAAAAT	CASC5,
chr14 : 55619312 - 55612019 : KTN1,	9.81205	0	5.07722	0	6.89883	0	0	5.57324	4.64941	3.37963	-0.132156	0.92936	0.998587	chr14	55619312	55612019	+	6	GTAG	TGTAATACAAGATGCTTTAAAGAAG	TTTTGTCAATGTGATCCTATAAAAC	KTN1,
chr9 : 33944365 - 33956146 : UBAP2,	16.0561	0	0	0	4.1393	3.61617	4.23078	8.35986	0	6.75926	0.120748	0.929614	0.998587	chr9	33944365	33956146	-	5	GTAG	GCGGCGGATACCCCCAGCTTCTAAG	CAGTGAAGACCTTTGTTTCAGAAAG	UBAP2,
chr6 : 75678927 - 75634707 : SENP6,	4.46002	2.61895	0	0	0	3.61617	2.53847	0	0	3.37963	-0.192867	0.930037	0.998587	chr6	75678927	75634707	+	6	GTAG	ATGTTATTATAGACTTTTATTTGAA	TAATGACGTATTTTGCGTATTTTCA	SENP6,
chr1 : 23050520 - 23030469 : KDM1A,	2.67601	3.49193	0	0	0	0	2.53847	0	0	5.63271	-0.221619	0.931031	0.998587	chr1	23050520	23030469	+	6	GTAG	TTTTCTTTTCATTAGAAACCGCACA	TTTCATCCATCTCTCTGTACTCTAC	KDM1A,
chr4 : 177353728 - 177339783 : NEIL3,	0	3.49193	5.07722	3.32915	8.2786	3.61617	0	0	0	7.8858	0.13607	0.931669	0.998587	chr4	177353728	177339783	+	6	GTAG	GCTGCAACCCTGGATATTCTAACAG	TCTGTTCATCTGTTAATTGACAAAC	NEIL3,
chr15 : 68146700 - 68086306 : PIAS1,	7.13603	0	0	0	0	2.71213	2.53847	0	6.97411	0	0.189669	0.932965	0.998587	chr15	68146700	68086306	+	6	GTAG	TTCTTGGACTGCAGAAATTGGAAGA	AAACTCTAAGGCTCATAACCATTTG	PIAS1,
chr10 : 71816349 - 71816884 : PSAP,	0	0	0	5.54858	5.51907	0	1.69231	0	0	0	-0.245354	0.933375	0.998587	chr10	71816349	71816884	-	0	TGTT	GCTATTAAATGGACTTCGTGATTTT	TCCCAAGCCACCAGCAGCTGCTTCC	PSAP,
chr18 : 21779685 - 21765772 : MIB1,	0	0	0	5.54858	0	0	0	2.78662	2.3247	4.50617	0.208364	0.933867	0.998587	chr18	21779685	21765772	+	6	GTAG	TAGTACAGTATCCAAGTGGCAATAG	CACATGGTTCCATCATGCTTGATGC	MIB1,
chr5 : 127526778 - 127523460 : PRRC1,	0	3.49193	0	0	0	6.3283	0	0	0	0	0.241909	0.937904	0.998587	chr5	127526778	127523460	+	6	GTAG	TGGTGGAATCTGGGGTTTTATTAAG	ATCATTTTTCTTCAATTATGGTATA	PRRC1,
chr15 : 68153695 - 68141946 : PIAS1,	8.92004	0	0	5.54858	0	3.61617	4.23078	0	3.48706	9.01234	-0.113831	0.938138	0.998587	chr15	68153695	68141946	+	6	GTAG	AATCCGGATCATTCTAGAGCTTTAA	CGAAAGCGCTGACTGTTGTCTGATG	PIAS1,
chr7 : 73459536 - 73470483 : BAZ1B,	0	0	6.76962	0	0	4.52022	0.846157	5.57324	0	0	0.185878	0.938209	0.998587	chr7	73459536	73470483	-	5	GTAG	GAAGAAAATGGTAGAGGAAGCAAAG	TCTTCAGCTTGGCGTTCCAGTTTCA	BAZ1B,
chr12 : 123590449 - 123586747 : TMED2,	0	3.49193	0	0	0	4.52022	0	0	0	0	-0.241523	0.938396	0.998587	chr12	123590449	123586747	+	6	GTAG	GTCCGGGAGAGAATACACAGAGCCA	TTCCTTTGTTATCTGGTCCTGTAAT	TMED2,
chr3 : 57657680 - 57672438 : DENND6A,	0	3.49193	0	0	0	4.52022	0	0	0	0	-0.241523	0.938396	0.998587	chr3	57657680	57672438	-	5	GTAG	CTGTTCATGAGGTGGATATTTTCAG	GTTTGGAATGCTGAGGATAAATTAC	DENND6A,
chr11 : 85974708 - 86031611 : PICALM,	5.35203	0	0	0	0	0	0	2.78662	4.06823	0	-0.224191	0.938918	0.998587	chr11	85974708	86031611	-	5	GTAG	CTTTGGCCCTGTATCAGGAGCACAG	ATCTCATTTGTGCACTGAATTAAGT	PICALM,
chr8 : 42974194 - 42950388 : HOOK3,	0	0	6.76962	0	0	8.13639	0	0	2.90588	0	0.197898	0.93895	0.998587	chr8	42974194	42950388	+	6	GTAG	CAAGAAGGGCAGCTCACAACACAAG	ATCATCATAATGGCTTGGATGTACT	HOOK3,
chr10 : 31908172 - 31910563 : ARHGAP12,	0	0	5.07722	0	0	5.42426	0	0	2.90588	0	0.214719	0.940671	0.998587	chr10	31908172	31910563	-	5	GTAG	CAGCAGCTCCACTGAACAGATAAGG	ATCTACACCAGTATCACATTTAAAC	ARHGAP12,
chr3 : 47037666 - 47046621 : SETD2,	6.24403	0	0	0	0	0	0	4.64437	3.48706	0	-0.207548	0.940782	0.998587	chr3	47037666	47046621	-	5	GTAG	AACATATGATGAAAACCCCATGAAG	ACTGAAGACTTGGCTGGGCATAACT	SETD2,
chr16 : 53157541 - 53155926 : CHD9,	0	3.49193	8.46203	5.54858	6.89883	2.71213	2.53847	4.64437	4.06823	3.37963	-0.0752272	0.941446	0.998587	chr16	53157541	53155926	+	6	GTAG	AAATCACCTATGTTTACAGCGACAG	TGACATGTCATGAAGTGTCAAAATC	CHD9,
chr1 : 117466427 - 117402186 : MAN1A2,	4.46002	0	0	0	0	2.71213	5.07694	0	0	0	0.199068	0.946048	0.998587	chr1	117466427	117402186	+	6	GTAG	CCCAGAACAGGGCGCTGGGGTCAGT	ATTTCTCAGACGTTCTTCCTCTTCC	MAN1A2,
chr17 : 32176213 - 32171043 : RHOT1,	0	0	0	8.87773	0	5.42426	0	6.50212	0	0	-0.157242	0.947923	0.998587	chr17	32176213	32171043	+	6	GTAG	ATGAAAGAACAGACAAAGACAGCAG	ATCAGTGATGTCTTCCCAACTCTAG	RHOT1,
chr12 : 82403130 - 82386803 : METTL25,	0	6.11088	0	0	0	8.13639	0	0	0	0	-0.189609	0.950414	0.998587	chr12	82403130	82386803	+	6	GTAG	GAAGAATTTGAAAACCAGCATAAAG	AATATTTTGGGAAAATCAGTCATAC	METTL25,
chr3 : 167602127 - 167627292 : WDR49,	0	0	0	4.43886	0	0	5.9231	0	0	0	-0.157031	0.959441	0.998587	chr3	167602127	167627292	-	5	GTAG	ACTTTTCAGCTTCTCCAAGGATAAA	AAATGATTTTCCTTGGCTGTGGGGA	WDR49,
chr11 : 32935435 - 32927157 : QSER1,	23.1921	31.4274	44.0026	26.6332	28.9751	30.7375	33.0001	21.3641	26.1529	42.8086	-0.0139045	0.959878	0.998587	chr11	32935435	32927157	+	6	GTAG	ACTTCTGATAAAAAGAAGAAAACAG	GGGATGTCCTTCTTCATAGCTTAAA	QSER1,
chr4 : 48379848 - 48369849 : SLAIN2,	7.13603	0	0	0	0	2.71213	0	3.71549	3.48706	0	-0.118886	0.960024	0.998587	chr4	48379848	48369849	+	6	GTAG	ATTCTAGCCCGGATGCAGGAAGAAA	TTTTTTCTTTGGTGATGAATACAGC	SLAIN2,
chr3 : 196487399 - 196488683 : RNF168,	0	5.2379	0	0	0	0	5.07694	3.71549	0	0	0.140048	0.960579	0.998587	chr3	196487399	196488683	-	5	GTAG	GGCAAGAAAGCTAAGCATTGATATT	AGACGAACTGGCTGATAGTCATCAG	RNF168,
chr4 : 128992167 - 129003876 : SCLT1,	4.46002	7.85685	0	0	0	3.61617	7.61541	6.50212	0	0	-0.0839353	0.960755	0.998587	chr4	128992167	129003876	-	5	GTAG	TCGAACAACTCCGAAAAAAACTTAG	AGCATCTTTTAATTCACTGTGCAAC	SCLT1,
chr20 : 36911218 - 36912552 : SAMHD1,	3.56802	1.74597	0	0	0	2.71213	0	3.71549	2.3247	0	0.11434	0.961069	0.998587	chr20	36911218	36912552	-	5	GTAG	ATGGAAGCCTATACTAAGCTGACAG	ACATGTCATACAGATTTCCAACTTC	SAMHD1,
chr7 : 92003235 - 91992158 : AKAP9,	0	0	6.76962	0	0	0	0	0	8.71764	0	-0.138689	0.963262	0.998587	chr7	92003235	91992158	+	6	GTAG	ACTCAATGTACTTAAATCAGAACAG	TCATCACAAAACTGCAACCATTTAC	AKAP9,
chr1 : 26732792 - 26729651 : ARID1A,	70.4683	70.7116	86.3127	107.642	102.103	91.3084	92.2311	68.7366	51.7247	102.515	0.00993454	0.963895	0.998587	chr1	26732792	26729651	+	6	GTAG	TCAGTCAAGACCCTCCAGCTTGCCT	CCATCTGATCCATTGGACTGGATGG	ARID1A,
chr9 : 83661777 - 83669327 : UBQLN1,	7.13603	0	0	0	0	7.23235	0	2.78662	0	0	-0.114931	0.964988	0.998587	chr9	83661777	83669327	-	5	GTAG	TCCCAGCCATCATAGCAGCATTTCT	ATTCCTGGTGTGTTGAACATACTAG	UBQLN1,
chr15 : 75411492 - 75413045 : SIN3A,	8.92004	0	0	15.536	0	9.04043	10.1539	0	15.1106	0	-0.0910945	0.965385	0.998587	chr15	75411492	75413045	-	5	GTAG	CCTGGAGATTTTGCACACATATCAG	ACTAATCACTCCTGGGGTGTCGATG	SIN3A,
chr11 : 77624963 - 77625818 : CLNS1A,	12.4881	4.36492	0	0	0	0	5.07694	5.57324	0	13.5185	-0.0871855	0.965946	0.998587	chr11	77624963	77625818	-	5	GTAG	GAAGAATATGATGTGGAAGCACATG	TCAGCAACAGGTTCTTTTGATTCTT	CLNS1A,
chr1 : 21715389 - 21729832 : USP48,	7.13603	0	0	3.32915	0	8.13639	6.76925	0	0	0	-0.0851396	0.96624	0.998587	chr1	21715389	21729832	-	5	GTAG	AATGAAGATATTCTGTGTCCACATG	CGTGTCTGAGACTTAGAAGGTTCTG	USP48,	PRKAR1A
chr8 : 144789851 - 144791316 : RPL8,	0	5.2379	5.07722	0	0	0	5.07694	9.28874	0	0	-0.0849595	0.966864	0.998587	chr8	144789851	144791316	-	3	CTGC	GTGGGTCTCATTGCTGCCCGCCGGA	TGGCTGAGGAGATAACCTTCTTGGA	RPL8,
chr4 : 128936655 - 128999794 : SCLT1,	5.35203	0	0	3.32915	0	7.23235	5.07694	0	0	0	-0.0904714	0.966881	0.998587	chr4	128936655	128999794	-	5	GTAG	CAGAAATTAGAATCAATAATCTAAA	AGAGTTCCACAGCCTGAGTTTTTTC	SCLT1,
chr20 : 48963898 - 48953556 : ARFGEF2,	0	0	0	4.43886	0	2.71213	3.38463	0	0	0	-0.118513	0.968484	0.998587	chr20	48963898	48953556	+	6	GTAG	GATGTAGTCACATCTGCCATTAAAG	TTTCCAGTTCTCTGGCCTCCTGCAA	ARFGEF2,
chr13 : 95763953 - 95757644 : DNAJC3,	13.3801	7.85685	16.9241	4.43886	4.1393	22.6011	11.8462	7.43099	8.13646	6.75926	-0.0211098	0.969545	0.998587	chr13	95763953	95757644	+	6	GTAG	TTGATAGAGGAAATGTATGATGAAG	CATTTTCACTTGGATTAGATTTGAG	DNAJC3,
chr4 : 121669954 - 121681761 : ANXA5,	0	0	0	7.76801	0	0	6.76925	3.71549	1.74353	0	0.0820776	0.970654	0.998587	chr4	121669954	121681761	-	5	GTAG	AGAGACCCTCTATTATGCTATGAAG	GTACTTTTTCATTTGTTCCAGCTCC	ANXA5,
chr17 : 68524914 - 68528967 : RP11-120M	3.56802	0	0	5.54858	0	0	0	0	8.71764	5.63271	0.0761967	0.970699	0.998587	chr17	68524914	68528967	-	0	ACTC	TCACATAGAAGTTATCCCCTTCATC	GATTGTGGTGCAGGGAGAACCAGGG	RP11-120M18.2,PRKAR1A,
chr1 : 155438327 - 155439068 : ASH1L,	0	7.85685	8.46203	0	4.1393	2.71213	0	10.2176	2.90588	3.37963	-0.0468823	0.971293	0.998587	chr1	155438327	155439068	-	5	GTAG	AAGAAGAGCAAGAGAATAATAAAAG	GGACTTCGAGAGGGAACTCCGTTTA	ASH1L,
chr2 : 207742342 - 207724800 : CCNYL1,	6.24403	5.2379	5.07722	0	6.89883	8.13639	5.9231	0	4.64941	0	0.0416525	0.972279	0.998587	chr2	207742342	207724800	+	6	GTAG	AGCTGAATGTGCAATAGTAACTTTG	GAAGGGTTTGACTCCAAAGCTAAAT	CCNYL1,
chr6 : 107904629 - 107924932 : SEC63,	4.46002	0	0	0	0	0	0	3.71549	3.48706	0	0.0999007	0.972998	0.998587	chr6	107904629	107924932	-	5	GTAG	ATAGTAATGGCCCGGAACCGTGAAG	CCATCCTGCAAGCAGAACTATTTTC	SEC63,
chr9 : 5968019 - 5988545 : KIAA2026,	5.35203	9.60281	10.1544	4.43886	13.7977	4.52022	4.23078	8.35986	7.55529	6.75926	0.020765	0.973421	0.998587	chr9	5968019	5988545	-	5	GTAG	GCAAAACACAAGAAGCACAAATCTG	TATCGTTGTCTTTTCTCTCAAGTGC	KIAA2026,
chr18 : 37084232 - 37066890 : KIAA1328,	0	7.85685	6.76962	0	20.6965	0	0	0	0	0	-0.0971922	0.974058	0.998587	chr18	37084232	37066890	+	6	GTAG	TGAATGGCAGTGACTCTGGACCAAG	GGAGAGTGCTTTTTCTACTGGATAC	KIAA1328,
chr3 : 46374927 - 46375354 : CCR5,	0	0	0	5.54858	0	0	0	0	0	9.01234	0.09707	0.974635	0.998587	chr3	46374927	46375354	-	0	CCAT	TGCATCCTCATATGCTGCACGAATA	AGTCATTTCATGGGTTGTTGGGAGG	CCR5,
chr11 : 59211820 - 59212398 : MPEG1,	4.46002	0	0	0	0	7.23235	0	0	0	0	0.0901425	0.976625	0.998587	chr11	59211820	59212398	-	0	CTGT	ATTATACATTCAACACCTACCCTGG	AGTTGGGTTGATTTTGACTGTGTAG	MPEG1,
chr9 : 98011284 - 98015427 : ANP32B,	4.46002	0	0	0	0	7.23235	0	0	0	0	0.0901425	0.976625	0.998587	chr9	98011284	98015427	-	0	TCAA	ACCATCCTCATCGTCCTCGTCTTCC	AAACAGATGATGAAGGAGAAGATGA	ANP32B,
chr7 : 139715932 - 139717015 : HIPK2,	9.81205	15.7137	15.2317	3.32915	9.65836	14.4647	8.46157	13.9331	10.4612	9.01234	0.0132796	0.978337	0.998587	chr7	139715932	139717015	-	5	GTAG	CCTACTTGCAGTCCAGATATTACAG	AAAACTTGCACATGTGAGGCCATAC	HIPK2,
chr16 : 18834892 - 18845651 : SMG1,	2.67601	2.61895	0	4.43886	0	2.71213	3.38463	4.64437	3.48706	0	-0.0372344	0.980616	0.998587	chr16	18834892	18845651	-	5	GTAG	TTTCTGCCCTTTGTACCCTTACAAG	CCTCATGATTGCAATTTTCTCTTCT	SMG1,
chr11 : 61367998 - 61366045 : TMEM138,	5.35203	0	0	3.32915	0	5.42426	0	0	1.74353	5.63271	-0.0477052	0.980652	0.998587	chr11	61367998	61366045	+	6	GTAG	ATGCTGTTTGTATTCCAGAGACTAG	GAAGAGGACTGCAATATCCTGGATG	TMEM138,
chr1 : 15721388 - 15717893 : PLEKHM2,	7.13603	0	0	0	0	0	0	0	5.81176	4.50617	-0.0625463	0.9807	0.998587	chr1	15721388	15717893	+	6	GTAG	TCTGTACCCAGCACAGACTGGGAAG	AGGGCCAGGTACAGCCAGGCACGGC	PLEKHM2,
chr1 : 113829592 - 113855049 : PTPN22,	3.56802	0	0	0	0	0	0	2.78662	2.3247	0	-0.0724695	0.980715	0.998587	chr1	113829592	113855049	-	5	GTAG	TGGAAAAAGTTTCACAAGGAGTAAG	GAAACTGGTAGATAGTTCGAGTTTC	PTPN22,
chr15 : 90221765 - 90217439 : SEMA4B,	0	4.36492	0	0	0	6.3283	0	0	0	0	-0.0734942	0.98099	0.998587	chr15	90221765	90217439	+	6	GTAG	GTCCCGCATTGCCCGCATCTGCAAG	CTGAGGAATGGCCGCTCTTCAGAGC	SEMA4B,
chr12 : 46229153 - 46243314 : SLC38A1,	0	12.2218	0	0	0	0	2.53847	0	0	16.8981	0.0666701	0.982238	0.998587	chr12	46229153	46243314	-	5	GTAG	CAAACACTGGAATCCTACTTTTTCT	CACACAGTAGACACTCAATAAATAT	SLC38A1,
chr11 : 108335961 - 108315823 : ATM,	0	3.49193	0	0	0	0	5.07694	0	0	0	-0.0658724	0.98314	0.998587	chr11	108335961	108315823	+	6	GTAG	GAAATTAACTATCTGTACTTATAAG	TTCTGTAGATTTCTAAGAGAAGATC	ATM,
chr15 : 63563008 - 63529014 : USP3,	6.24403	0	0	0	0	4.52022	0	0	5.23058	0	0.0559687	0.983333	0.998587	chr15	63563008	63529014	+	6	GTAG	TTTGGAAGATTATGCCAAACTTTAG	GTCACACCAGATAAACATTTGAAGG	USP3,
chr1 : 171587751 - 171579354 : PRRC2C,	4.46002	0	0	6.6583	0	2.71213	0	4.64437	8.71764	0	-0.0358427	0.983855	0.998587	chr1	171587751	171579354	+	6	GTAG	CCACACCAACATCTAGTCCCTTCCG	TCCATATAGAAGGCTGGGATTTGAG	PRRC2C,
chr10 : 101792839 - 101800400 : MGEA5,	3.56802	0	0	0	5.51907	0	0	0	0	0	-0.0511199	0.986899	0.998587	chr10	101792839	101800400	-	5	GTAG	CAGACCTTATTTTCCTAAGGATGAG	GACACAGTACTATCTTCACTGTCAG	MGEA5,
chr10 : 68749685 - 68747161 : CCAR1,	3.56802	0	0	0	5.51907	0	0	0	0	0	-0.0511199	0.986899	0.998587	chr10	68749685	68747161	+	6	GTAG	AGTTTTCAAAGTTTTCTTTAGATTG	TTGGGGGGTTTTCCCTTTGACAGCA	CCAR1,
chr15 : 63559970 - 63532647 : USP3,	4.46002	0	0	14.4263	0	4.52022	0	8.35986	9.29882	5.63271	-0.0196806	0.987521	0.998587	chr15	63559970	63532647	+	6	GTAG	CCAGGAGCCAAGGGGATAACAATGT	CAAGGGCTTTTGTTGGACCGGCACA	USP3,	RP4-777O23.3	AC005154.6
chr7 : 155745602 - 155737530 : RBM33,	4.46002	0	0	0	0	3.61617	0	0	2.90588	0	-0.041029	0.988984	0.998587	chr7	155745602	155737530	+	6	GTAG	CAGGGTGATTAAGCTGTCAGGTGGG	TATGCTGTGGAAATTCTGGAGGGCC	RBM33,
chr8 : 63187745 - 63175331 : YTHDF3,	0	0	0	5.54858	0	0	2.53847	0	0	5.63271	-0.0383754	0.989324	0.998587	chr8	63187745	63175331	+	6	GTAG	AGAAGAGGAGGAAGCCATGCGTAGG	TGAATCGAACCGTTTTGTACTGAAA	YTHDF3,
chr9 : 19378432 - 19379552 : RPS6,	3.56802	6.11088	0	0	5.51907	2.71213	0	3.71549	2.90588	0	-0.0224547	0.989336	0.998587	chr9	19378432	19379552	-	0	TTTT	AAGAGCTAGCAGAATCCGCAAACTT	CCATACGCTTCTCATAGAAAGTACG	RPS6,
chr1 : 47280241 - 47282459 : STIL,	8.02804	6.98387	0	3.32915	4.1393	5.42426	9.30772	0	5.23058	4.50617	0.0116272	0.990717	0.998587	chr1	47280241	47282459	-	5	GTAG	ACAGCTAAGACTACTTCAGGCACAG	CCCAGAAGATAACTTTTGGGAAGAC	STIL,
chr7 : 30550636 - 30562128 : AC005154.6,	0	6.11088	0	0	0	5.42426	0	3.71549	0	0	-0.0274902	0.992011	0.998587	chr7	30550636	30562128	-	5	GTAG	CAGTAACCCTGTGTTCTATCCACAG	AGTGGAAAAGGGAATTTTAGGAAAA	AC005154.6,RP4-777O23.3,AC005154.6,
chr4 : 102714438 - 102730736 : MANBA,	0	0	0	6.6583	5.51907	2.71213	0	0	1.74353	0	-0.0236767	0.992214	0.998587	chr4	102714438	102730736	-	5	GTAG	TACTTCACATTTTCCCCAATATATG	TCCCTACAGATAGATGCTTCTTCAA	MANBA,
chr15 : 80122800 - 80120328 : ZFAND6,	0	15.7137	0	9.98744	4.1393	6.3283	14.3847	3.71549	10.4612	0	0.0111314	0.993137	0.998587	chr15	80122800	80120328	+	6	GTAG	GTACCTGAAACAGAAGATGTGCAGG	TGAGCCATGTTCCTCAGTTGCACAC	ZFAND6,
chr1 : 169515444 - 169524908 : F5,	0	3.49193	0	0	0	0	0	0	5.23058	0	0.0155014	0.996028	0.998665	chr1	169515444	169524908	-	5	GTAG	GCTGAAATCCTCCATGGTGGACAAG	CTTAGTCCCATTGGCATCCTACAGT	F5,
chr3 : 183786301 - 183736718 : YEATS2,	0	3.49193	0	0	0	0	0	0	5.23058	0	0.0155014	0.996028	0.998665	chr3	183786301	183736718	+	6	GTAG	CTCAGCAAACGGTCCTGCACAACAG	TCTGGTCAGGTGAAAAGGAGGCTCT	YEATS2,
chr9 : 33960826 - 33996333 : UBAP2,	0	2.61895	0	6.6583	0	4.52022	5.07694	0	0	4.50617	0.00642146	0.997302	0.998665	chr9	33960826	33996333	-	5	GTAG	GACAACAGAAGACTGGACTGAAGAT	GATTTTTCCCTGTCACTTCCATAAG	UBAP2,
chr17 : 48860449 - 48848064 : CALCOCO2,	0	0	0	4.43886	6.89883	0	0	0	0	0	-0.00134774	0.999651	0.999651	chr17	48860449	48848064	+	6	GTAG	CTTGCCTATGGAAACCCATATTCTG	ACTCACGGGTTGTCTTCCACCCCAC	CALCOCO2,
chr1 : 1804419 - 1839238 : GNB1,	6.24403	0	0	0	0	0	0	0	0	25.9105	1.4417	NA	NA	chr1	1804419	1839238	-	5	GTAG	AGTCGTGAGCTGGCAGGACACACAG	TGGTCTCCAATACATGTAAATTTGT	GNB1,
chr11 : 108335961 - 108315823 : ATM,	0	3.49193	0	0	0	0	5.07694	0	0	0	-0.0658724	0.98314	0.998587	chr11	108335961	108315823	+	6	GTAG	GAAATTAACTATCTGTACTTATAAG	TTCTGTAGATTTCTAAGAGAAGATC	ATM,
chr15 : 63563008 - 63529014 : USP3,	6.24403	0	0	0	0	4.52022	0	0	5.23058	0	0.0559687	0.983333	0.998587	chr15	63563008	63529014	+	6	GTAG	TTTGGAAGATTATGCCAAACTTTAG	GTCACACCAGATAAACATTTGAAGG	USP3,
chr1 : 171587751 - 171579354 : PRRC2C,	4.46002	0	0	6.6583	0	2.71213	0	4.64437	8.71764	0	-0.0358427	0.983855	0.998587	chr1	171587751	171579354	+	6	GTAG	CCACACCAACATCTAGTCCCTTCCG	TCCATATAGAAGGCTGGGATTTGAG	PRRC2C,
chr10 : 101792839 - 101800400 : MGEA5,	3.56802	0	0	0	5.51907	0	0	0	0	0	-0.0511199	0.986899	0.998587	chr10	101792839	101800400	-	5	GTAG	CAGACCTTATTTTCCTAAGGATGAG	GACACAGTACTATCTTCACTGTCAG	MGEA5,
chr10 : 68749685 - 68747161 : CCAR1,	3.56802	0	0	0	5.51907	0	0	0	0	0	-0.0511199	0.986899	0.998587	chr10	68749685	68747161	+	6	GTAG	AGTTTTCAAAGTTTTCTTTAGATTG	TTGGGGGGTTTTCCCTTTGACAGCA	CCAR1,
chr15 : 63559970 - 63532647 : USP3,	4.46002	0	0	14.4263	0	4.52022	0	8.35986	9.29882	5.63271	-0.0196806	0.987521	0.998587	chr15	63559970	63532647	+	6	GTAG	CCAGGAGCCAAGGGGATAACAATGT	CAAGGGCTTTTGTTGGACCGGCACA	USP3,
chr7 : 155745602 - 155737530 : RBM33,	4.46002	0	0	0	0	3.61617	0	0	2.90588	0	-0.041029	0.988984	0.998587	chr7	155745602	155737530	+	6	GTAG	CAGGGTGATTAAGCTGTCAGGTGGG	TATGCTGTGGAAATTCTGGAGGGCC	RBM33,
chr8 : 63187745 - 63175331 : YTHDF3,	0	0	0	5.54858	0	0	2.53847	0	0	5.63271	-0.0383754	0.989324	0.998587	chr8	63187745	63175331	+	6	GTAG	AGAAGAGGAGGAAGCCATGCGTAGG	TGAATCGAACCGTTTTGTACTGAAA	YTHDF3,
chr9 : 19378432 - 19379552 : RPS6,	3.56802	6.11088	0	0	5.51907	2.71213	0	3.71549	2.90588	0	-0.0224547	0.989336	0.998587	chr9	19378432	19379552	-	0	TTTT	AAGAGCTAGCAGAATCCGCAAACTT	CCATACGCTTCTCATAGAAAGTACG	RPS6,
chr1 : 47280241 - 47282459 : STIL,	8.02804	6.98387	0	3.32915	4.1393	5.42426	9.30772	0	5.23058	4.50617	0.0116272	0.990717	0.998587	chr1	47280241	47282459	-	5	GTAG	ACAGCTAAGACTACTTCAGGCACAG	CCCAGAAGATAACTTTTGGGAAGAC	STIL,
chr7 : 30550636 - 30562128 : AC005154.6,	0	6.11088	0	0	0	5.42426	0	3.71549	0	0	-0.0274902	0.992011	0.998587	chr7	30550636	30562128	-	5	GTAG	CAGTAACCCTGTGTTCTATCCACAG	AGTGGAAAAGGGAATTTTAGGAAAA	AC005154.6,RP4-777O23.3,AC005154.6,
chr4 : 102714438 - 102730736 : MANBA,	0	0	0	6.6583	5.51907	2.71213	0	0	1.74353	0	-0.0236767	0.992214	0.998587	chr4	102714438	102730736	-	5	GTAG	TACTTCACATTTTCCCCAATATATG	TCCCTACAGATAGATGCTTCTTCAA	MANBA,
chr15 : 80122800 - 80120328 : ZFAND6,	0	15.7137	0	9.98744	4.1393	6.3283	14.3847	3.71549	10.4612	0	0.0111314	0.993137	0.998587	chr15	80122800	80120328	+	6	GTAG	GTACCTGAAACAGAAGATGTGCAGG	TGAGCCATGTTCCTCAGTTGCACAC	ZFAND6,
chr1 : 169515444 - 169524908 : F5,	0	3.49193	0	0	0	0	0	0	5.23058	0	0.0155014	0.996028	0.998665	chr1	169515444	169524908	-	5	GTAG	GCTGAAATCCTCCATGGTGGACAAG	CTTAGTCCCATTGGCATCCTACAGT	F5,
chr3 : 183786301 - 183736718 : YEATS2,	0	3.49193	0	0	0	0	0	0	5.23058	0	0.0155014	0.996028	0.998665	chr3	183786301	183736718	+	6	GTAG	CTCAGCAAACGGTCCTGCACAACAG	TCTGGTCAGGTGAAAAGGAGGCTCT	YEATS2,
chr9 : 33960826 - 33996333 : UBAP2,	0	2.61895	0	6.6583	0	4.52022	5.07694	0	0	4.50617	0.00642146	0.997302	0.998665	chr9	33960826	33996333	-	5	GTAG	GACAACAGAAGACTGGACTGAAGAT	GATTTTTCCCTGTCACTTCCATAAG	UBAP2,
chr17 : 48860449 - 48848064 : CALCOCO2,	0	0	0	4.43886	6.89883	0	0	0	0	0	-0.00134774	0.999651	0.999651	chr17	48860449	48848064	+	6	GTAG	CTTGCCTATGGAAACCCATATTCTG	ACTCACGGGTTGTCTTCCACCCCAC	CALCOCO2,
chr1 : 1804419 - 1839238 : GNB1,	6.24403	0	0	0	0	0	0	0	0	25.9105	1.4417	NA	NA	chr1	1804419	1839238	-	5	GTAG	AGTCGTGAGCTGGCAGGACACACAG	TGGTCTCCAATACATGTAAATTTGT	GNB1,

## Sheet: CD4
TableS1: CircRNAs detected in Sepsis patients (S32,S33,S43,S44,S49,S50) and healthy volunteers (H37,H38,H39,H45).
Statistics: In red are the upregulated and in blue are the down-regulated circRNAs in sepsis relative to health.
	Normalized Counts										Statistics			MapSplice2 output
CircRNA_ID	H37	H38	H39	H45	S32	S33	S43	S44	S49	S50	log2FoldChange	pvalue	padj	chromosome	Doner_end	Acceptor_start	Strand	flank_case	flank_string	doner_seq	acceptor_seq	Annotated_gene_donor
chr17 : 67975958 - 67945409 : BPTF,	74.5918	67.9905	60.0453	62.144	90.2424	132.633	118.914	83.5126	89.8749	123.407	0.694336	0.000856275	0.552181	chr17	67975958	67945409	+	6	GTAG	AATTGAAAGGCTTCAAAGCTAGCAG	TTACTCTGCCTTTGTTCACCTGTAC	BPTF,
chr4 : 48104901 - 48114402 : TXK,	0	0	0	0	14.9096	3.4361	16.6701	2.63724	0	4.51488	5.06825	0.00146662	0.552181	chr4	48104901	48114402	-	5	GTAG	GGCAGAACATCTATTGAGACAAGAG	CAGAAAACCGACTGGATGGTGTTAT	TXK,
chr13 : 20067390 - 20051433 : ZMYM2,	0	0	0	0	0	8.93385	6.66805	7.03264	9.86432	4.51488	4.879	0.00270985	0.680173	chr13	20067390	20051433	+	6	GTAG	TTACCTTTGCCTTGGAATACAGGAG	ATTTACAACAGTCACACCTTGCAGC	ZMYM2,
chr1 : 243572926 - 243843282 : AKT3,	16.2746	19.8306	4.53172	14.577	4.7083	3.4361	2.22268	5.27448	0	0	-2.37592	0.0039449	0.742627	chr1	243572926	243843282	-	5	GTAG	AAAGATTGTGTACCGTGATCTCAAG	TCCCACTCTCTAGTGATGACTCAGC	AKT3,
chr1 : 117420649 - 117402186 : MAN1A2,	62.3859	48.1599	52.1148	49.8687	101.228	134.008	103.355	55.382	54.8018	71.4856	0.714854	0.00616677	0.928715	chr1	117420649	117402186	+	6	GTAG	AGCATATTACCTATCAGGAGAGGAG	ATTTCTCAGACGTTCTTCCTCTTCC	MAN1A2,
chr14 : 65075774 - 65078036 : MAX,	0	0	0	0	16.479	0	3.33402	9.66988	5.48018	0	4.80004	0.0102562	0.999043	chr14	65075774	65078036	-	5	GTAG	CGGAGGGCCGTGTGACACTCTCGTG	TGTCTAGGATTTGGGCCCGGGATGC	MAX,
chr14 : 55619312 - 55612019 : KTN1,	4.06864	4.24941	3.39879	2.30163	19.6179	15.1188	11.1134	9.66988	5.48018	6.01984	1.72013	0.0140353	0.999043	chr14	55619312	55612019	+	6	GTAG	TGTAATACAAGATGCTTTAAAGAAG	TTTTGTCAATGTGATCCTATAAAAC	KTN1,
chr2 : 135639122 - 135631718 : R3HDM1,	24.4119	28.3294	16.994	22.2491	14.1249	10.3083	13.3361	6.15356	18.6326	14.2971	-0.847671	0.024552	0.999043	chr2	135639122	135631718	+	6	GTAG	AGCATAGGCAGGCTTTCAAAAACAG	CAATTTCAGCAGCATCATTCTGTCC	R3HDM1,
chr14 : 49825867 - 49831361 : NEMF,	0	5.66588	6.79759	4.60326	16.479	15.806	7.77939	10.549	5.48018	15.0496	1.46903	0.0261708	0.999043	chr14	49825867	49831361	-	5	GTAG	TTCAAAAAGCAAGAAAAGTATATTG	TCTTGGAATAAAATTCATCCACCGC	NEMF,
chr5 : 56865977 - 56864734 : MAP3K1,	0	0	0	0	8.63188	5.49776	8.89073	0	4.38414	0	4.44609	0.0283858	0.999043	chr5	56865977	56864734	+	6	GTAG	CTTCTACGTCTAGTTCAGAAAACAG	GTGGTGTGATTCTGCCACTCTGAAA	MAP3K1,
chr11 : 119285566 - 119284969 : CBL,	35.2616	48.1599	21.5257	51.4031	16.479	30.9249	30.0062	24.6142	25.2088	24.0794	-0.643309	0.0301779	0.999043	chr11	119285566	119284969	+	6	GTAG	CACGTTCAGTCTGGATACCTCCATG	AGAATGGAGAAGGCGGCCGTTCCAC	CBL,
chr9 : 111787947 - 111786793 : C9orf84,	4.06864	8.49881	0	8.43932	16.479	5.49776	20.0041	14.0653	12.0564	12.0397	1.31685	0.0333255	0.999043	chr9	111787947	111786793	+	6	GTAG	AGATTATGACTCACTAAAGACTCGG	GTTGGCATCTTCTTCTAACAGAAGG	C9orf84,
chr20 : 33623296 - 33619517 : CBFA2T2,	0	0	0	0	2.35415	10.9955	0	5.27448	0	6.01984	4.30732	0.0402594	0.999043	chr20	33623296	33619517	+	6	GTAG	ATGGGAAGAGGCCCAGTCCAGAGAG	ATTCCTCAATTGTCACTGTTGAGTT	CBFA2T2,
chr1 : 28476291 - 28473554 : PHACTR4,	5.42486	0	4.53172	4.60326	9.41659	15.1188	4.44537	23.7352	4.38414	7.5248	1.54289	0.0424936	0.999043	chr1	28476291	28473554	+	6	GTAG	GAAGATGAAGATGAAAGCTATCAGA	CTGTTTATTGCTTGGGACAGTTCAG	PHACTR4,
chr4 : 94586444 - 94573351 : PDLIM5,	10.8497	0	7.93052	9.97374	3.92358	17.1805	14.4474	15.8234	18.6326	26.3368	1.1222	0.0455686	0.999043	chr4	94586444	94573351	+	6	GTAG	AAGCCGATAATACAAAGAAGGCAAA	CTCAGGCTTGGGTGCAGCAGATGCT	PDLIM5,
chr5 : 57249576 - 57246300 : GPBP1,	0	0	0	0	0	12.37	0	4.3954	0	9.02976	4.37156	0.0539451	0.999043	chr5	57249576	57246300	+	6	GTAG	TGAAAGCCGTGCTGGCTCAGAGAAG	CTAGATTTAGGATTCGGAGGATATT	GPBP1,
chr5 : 32379115 - 32420103 : ZFR,	0	0	0	0	10.2013	0	4.44537	11.428	0	0	4.37756	0.0545264	0.999043	chr5	32379115	32420103	-	5	GTAG	AACTTGGTCTGATTTTCCAAGCTGG	GGCTACACCCGAAGCTGGCTGCTGG	ZFR,
chr6 : 149379518 - 149369909 : TAB2,	0	4.24941	7.93052	0	5.49301	13.7444	7.77939	14.0653	6.57621	8.27728	1.65798	0.0586132	0.999043	chr6	149379518	149369909	+	6	GTAG	TCTGATGATGCTGCCTACACACAAG	CTCATCTCTTCTGTCCAAGCATTTT	TAB2,
chr1 : 243545510 - 243695716 : AKT3,	0	0	0	0	3.13886	0	7.77939	0	5.48018	5.26736	4.10242	0.0626265	0.999043	chr1	243545510	243695716	-	5	GTAG	CTGGCAAGATGTATATGATAAAAAG	GGCCTCCAGTTTTTTATATATTCTC	AKT3,
chr1 : 23397545 - 23418016 : TCEA3,	24.4119	21.247	32.855	28.3868	8.63188	35.0482	11.1134	19.3398	12.0564	9.02976	-0.739288	0.0657092	0.999043	chr1	23397545	23418016	-	1	ATAC	AAGATGGCATCAGAAATCGAAGATC	AACTCCAATCCTGGTTGTCTGCAAA	TCEA3,
chr1 : 155675010 - 155679512 : YY1AP1,	0	0	0	0	3.13886	0	5.55671	0	8.76828	3.7624	4.07106	0.0670177	0.999043	chr1	155675010	155679512	-	5	GTAG	GGCCAGTAGCACCAGGATATGTCTT	TGGAGAATCCCATCTCATCTTGGAA	YY1AP1,
chr4 : 48379848 - 48369849 : SLAIN2,	20.3432	8.49881	0	9.97374	6.27773	3.4361	0	0	0	2.25744	-2.22936	0.0674346	0.999043	chr4	48379848	48369849	+	6	GTAG	ATTCTAGCCCGGATGCAGGAAGAAA	TTTTTTCTTTGGTGATGAATACAGC	SLAIN2,
chr3 : 63983021 - 63979915 : ATXN7,	0	0	0	0	0	8.93385	11.1134	0	0	3.7624	4.2456	0.0696438	0.999043	chr3	63983021	63979915	+	6	GTAG	CTGCACCCGGTCTTTGACATGCAAG	TTGCTGGATGAGCTATGTCTTCTTT	ATXN7,
chr6 : 158314268 - 158282263 : TULP4,	0	4.24941	0	0	3.13886	2.74888	3.33402	10.549	9.86432	3.7624	2.53022	0.0701795	0.999043	chr6	158314268	158282263	+	6	GTAG	CAACCTCCGGGGCCACAATAGCGAG	TGGAGATACTCAGCTTGACCCAGGA	TULP4,
chr4 : 73090667 - 73092300 : ANKRD17,	44.7551	42.4941	22.6586	29.154	39.2358	54.2903	50.0104	54.5029	37.2652	45.9013	0.457984	0.0756587	0.999043	chr4	73090667	73092300	-	5	GTAG	CAGAGACCTGCTCCAAGTCCCTCAG	TTGTCTTGTTGATTCAGTGCCACCC	ANKRD17,
chr1 : 108699315 - 108699680 : PRPF38B,	0	0	12.4622	4.60326	0	0	0	0	0	0	-4.742	0.0763873	0.999043	chr1	108699315	108699680	-	0	TCGT	ACTTCGGGATCTTCGCCGTTCTTTC	GTAGAAGCAGAAGCAGAGAAAGGAA	PRPF38B,
chr1 : 35399576 - 35392212 : ZMYM4,	21.6994	0	5.66465	0	0	0	0	0	0	0	-5.41431	0.0782695	0.999043	chr1	35399576	35392212	+	6	GTAG	TGGCTTCCCCCAACCCAGACGAAGA	GCAGCTTGAACCATGGAAATATTTG	ZMYM4,
chr4 : 152411303 - 152412529 : FBXW7,	52.8924	28.3294	46.4502	39.8949	61.2079	41.2332	66.6805	51.8657	39.4573	82.0203	0.447233	0.0868936	0.999043	chr4	152411303	152412529	-	5	GTAG	CCCATTCTATACAAAAACAACAAAA	GGCAATCTATCCTAAGGAAGTAATC	FBXW7,
chr7 : 92213195 - 92226682 : KRIT1,	0	0	0	0	2.35415	4.81054	0	6.15356	5.48018	0	3.90566	0.088765	0.999043	chr7	92213195	92226682	-	5	GTAG	TCATCTCCTCAACATGGAAACTAAG	GCGAGTGGCCTCAACTTTTCCATAC	KRIT1,
chr7 : 158918869 - 158879684 : WDR60,	0	0	0	0	0	0	21.1155	3.51632	0	0	4.28488	0.0965277	0.999043	chr7	158918869	158879684	+	6	GTAG	AACACCAGTCTACCATTCCTTCAAA	TGTCCTTGCTGTCTCCGTACTGCAG	WDR60,
chrX : 148662768 - 148651999 : AFF2,	4.06864	0	5.66465	3.06884	0	0	0	0	0	0	-4.32454	0.100437	0.999043	chrX	148662768	148651999	+	6	GTAG	GTTCACCATCCTCCAAACAAGTGAA	TGCACTACGGTCTTGTTCATAGTGA	AFF2,
chr1 : 155921375 - 155923687 : KIAA0907,	0	0	0	0	5.49301	0	5.55671	2.63724	0	3.7624	3.79687	0.105902	0.999043	chr1	155921375	155923687	-	5	GTAG	GCAGCCTCCAGCTAGCACTGGACAG	AGCCAGGCCTTCTGGTTTGGGGTGA	KIAA0907,
chr17 : 49298106 - 49312845 : ZNF652,	0	0	0	0	0	10.3083	6.66805	0	0	3.00992	3.9971	0.106933	0.999043	chr17	49298106	49312845	-	5	GTAG	TTATAATTTCATATCAGCTGATGAG	TGAACGATTTGTTACAGGAAACACA	ZNF652,
chr4 : 128936655 - 128970468 : SCLT1,	0	7.08235	0	3.06884	16.479	10.9955	4.44537	4.3954	3.28811	6.01984	1.61495	0.108522	0.999043	chr4	128936655	128970468	-	5	GTAG	CAGAAATTAGAATCAATAATCTAAA	AACTCTCAGCTCTAATTTGGCTTGC	SCLT1,
chr4 : 105237351 - 105233897 : TET2,	0	0	0	0	2.35415	7.55941	0	3.51632	3.28811	0	3.74203	0.116424	0.999043	chr4	105237351	105233897	+	6	GTAG	GATTTCCCATCTTGCAGATGTGTAG	CACAAGGCTGCCCTCTAGTTGAATT	TET2,
chr4 : 48394653 - 48369849 : SLAIN2,	6.78107	16.9976	13.5952	8.43932	3.13886	0	12.2248	0	7.67225	5.26736	-1.31594	0.120864	0.999043	chr4	48394653	48369849	+	6	GTAG	CTTCAAACTTCATCTACAAAAAGAG	TTTTTTCTTTGGTGATGAATACAGC	SLAIN2,
chr15 : 63696124 - 63716473 : HERC1,	0	5.66588	0	6.13768	5.49301	19.9294	5.55671	7.91172	2.19207	9.02976	1.47478	0.122988	0.999043	chr15	63696124	63716473	-	5	GTAG	GAGTGGCCGATTGCATCACTATCAG	CTGCAGAGTCCTGGTTTTCTGATAT	HERC1,
chr11 : 65502288 - 65502631 : AP000769.1,	6.78107	7.08235	0	0	0	0	0	0	0	0	-4.42587	0.123704	0.999043	chr11	65502288	65502631	-	0	GATA	GTTTTAAATTATTATTAAATCACCT	AGGGAGGGGAAACTTTTTTTTTTTC	AP000769.1,
chr11 : 34092056 - 34086064 : CAPRIN1,	2.71243	0	0	0	0	6.18498	0	4.3954	9.86432	6.77232	2.87057	0.124174	0.999043	chr11	34092056	34086064	+	6	GTAG	CTTCAGCAAGAACAGCTTCAAACAG	GTTGCTGCTGGAGTGAATTTACCAC	CAPRIN1,
chr9 : 97330767 - 97330154 : CCDC180,RP11-23J9.4,CCDC180,RP11-23J9.4,	0	0	0	0	5.49301	2.74888	3.33402	4.3954	0	0	3.67237	0.126505	0.999043	chr9	97330767	97330154	+	6	GTAG	GCAAGAGAGTTTATCTGTGGGTGAG	TGAAAATGACTTCTCCAGCCAAGTT	CCDC180,RP11-23J9.4,CCDC180,RP11-23J9.4,
chr3 : 114693528 - 114717527 : ZBTB20,	5.42486	0	7.93052	0	0	0	0	0	0	0	-4.37968	0.131052	0.999043	chr3	114693528	114717527	-	5	GTAG	ATATTCCTCATGACATTGCTGTCTG	GATTCTTGTCCATGTTGCTTTTCCA	ZBTB20,
chr4 : 128936655 - 129003876 : SCLT1,	8.13729	4.24941	15.861	6.13768	7.06245	0	5.55671	0	0	3.7624	-1.65718	0.137718	0.999043	chr4	128936655	129003876	-	5	GTAG	CAGAAATTAGAATCAATAATCTAAA	AGCATCTTTTAATTCACTGTGCAAC	SCLT1,
chr5 : 65451475 - 65473952 : ADAMTS6,	0	0	0	2.30163	9.41659	13.0572	0	2.63724	0	2.25744	2.7965	0.138112	0.999043	chr5	65451475	65473952	-	5	GTAG	ACGATAATGCAGTTCTTATTACTAG	TACTAAAGTATGGCCATTTTTTAAC	ADAMTS6,
chr4 : 48383784 - 48369849 : SLAIN2,	51.5362	59.4917	70.2417	64.4457	53.3607	86.5897	41.1196	83.5126	165.501	109.862	0.547295	0.138682	0.999043	chr4	48383784	48369849	+	6	GTAG	CGTATGCAACCTCAGGCTTCAGCCA	TTTTTTCTTTGGTGATGAATACAGC	SLAIN2,
chr9 : 75077159 - 75080941 : NMRK1,	0	7.08235	0	5.37047	0	0	0	0	0	0	-4.28311	0.146033	0.999043	chr9	75077159	75080941	-	5	GTAG	AAAAATGGATTTTTGCAGTACGATG	ATCACCACCATGTTTCTTGTAGAGC	NMRK1,
chr2 : 231460721 - 231463223 : NCL,	5.42486	0	0	6.90489	0	0	0	0	0	0	-4.27421	0.147832	0.999043	chr2	231460721	231463223	-	0	GAAA	GGATGACGACGACGACGAAGATGAT	CCTCTTCTCCACTGCTATCATCTTC	NCL,
chr6 : 149676260 - 149695221 : LATS1,	0	0	0	0	0	0	8.89073	0	10.9604	0	3.97143	0.148289	0.999043	chr6	149676260	149695221	-	5	GTAG	AACACCATTAGAAACACAAATGAAG	TCTGAAGAGCTTGTATAACCATATC	LATS1,
chr1 : 111174963 - 111147642 : CEPT1,	0	0	0	0	4.7083	0	3.33402	4.3954	0	2.25744	3.5503	0.149274	0.999043	chr1	111174963	111147642	+	6	GTAG	AGGACCACCTTTTTGGCAATCTATG	GTAGGTTTTTGTGGCTGGTGCTTAC	CEPT1,
chr1 : 155438327 - 155439068 : ASH1L,	4.06864	0	5.66465	10.7409	6.27773	10.9955	17.7815	6.15356	15.3445	8.27728	0.979297	0.15092	0.999043	chr1	155438327	155439068	-	5	GTAG	AAGAAGAGCAAGAGAATAATAAAAG	GGACTTCGAGAGGGAACTCCGTTTA	ASH1L,
chr3 : 183762279 - 183736718 : YEATS2,	0	0	0	0	0	5.49776	0	3.51632	7.67225	0	3.7311	0.153284	0.999043	chr3	183762279	183736718	+	6	GTAG	GTCAGCAAAGGTTCAGCCCTCCAAG	TCTGGTCAGGTGAAAAGGAGGCTCT	YEATS2,
chr3 : 196487399 - 196488683 : RNF168,	0	0	0	0	3.13886	3.4361	0	0	5.48018	2.25744	3.51301	0.155026	0.999043	chr3	196487399	196488683	-	5	GTAG	GGCAAGAAAGCTAAGCATTGATATT	AGACGAACTGGCTGATAGTCATCAG	RNF168,
chr12 : 46229153 - 46254936 : SLC38A1,	0	0	7.93052	0	15.6943	2.74888	6.66805	7.91172	0	9.02976	1.82054	0.156829	0.999043	chr12	46229153	46254936	-	5	GTAG	CAAACACTGGAATCCTACTTTTTCT	AAATAGCTCAAAAGTTTCCTTGACT	SLC38A1,
chr15 : 93009323 - 93000512 : CHD2,	28.4805	15.5812	20.3928	25.3179	12.5555	24.7399	13.3361	26.3724	5.48018	5.26736	-0.609813	0.163938	0.999043	chr15	93009323	93000512	+	6	GTAG	AGGAGCACATCAAACTCTGGAGGAG	GAGGCTTCCGCTTCTTTAATTTGGC	CHD2,
chr1 : 89719075 - 89712709 : LRRC8C,	0	0	0	0	0	0	13.3361	0	5.48018	0	3.89383	0.164116	0.999043	chr1	89719075	89712709	+	6	GTAG	TTCCCAAAGTCACTCACCGATAAAG	GGCAGATTATCTTGTCTTGCATGAC	LRRC8C,
chr3 : 138570318 - 138572932 : CEP70,	0	0	0	0	3.13886	8.93385	0	3.51632	0	0	3.64561	0.170391	0.999043	chr3	138570318	138572932	-	5	GTAG	TCAAAAGGAGCAGAAAACTTTACAG	TTAGGGGCTACCGGAAACATAGTTA	CEP70,
chr10 : 96952196 - 96944113 : LCOR,	33.9054	15.5812	26.0574	34.5245	14.1249	7.55941	18.8928	19.3398	42.7454	14.2971	-0.538811	0.173826	0.999043	chr10	96952196	96944113	+	6	GTAG	GCTGCTCCAGTACTCAAGGGAACGG	GTTCATCCAGACCGACTAAGTGTCC	LCOR,
chr13 : 77205256 - 77243951 : MYCBP2,	0	0	0	2.30163	7.06245	6.87219	0	0	6.57621	3.7624	2.61916	0.174125	0.999043	chr13	77205256	77243951	-	5	GTAG	AGGAGAATATACTGCTAAAATTAAG	TTCTCCGGAACCACAACCACAGATC	MYCBP2,
chr10 : 11936545 - 11952249 : UPF2,	0	5.66588	0	5.37047	0	0	0	0	0	0	-4.11086	0.176099	0.999043	chr10	11936545	11952249	-	5	GTAG	AACAAGAAAAGGCAATAAACAGCAG	AACTTTTCTTCCACCAAACATAACG	UPF2,
chr3 : 70987994 - 71053773 : FOXP1,	5.42486	0	5.66465	0	0	0	0	0	0	0	-4.11027	0.17724	0.999043	chr3	70987994	71053773	-	5	GTAG	AGAACCCAAAGCCGCCCCTCAGCCC	TCATCATAGCCACTGACACGGGAAC	FOXP1,
chr7 : 152157761 - 152163826 : KMT2C,	0	0	0	0	0	3.4361	0	5.27448	6.57621	0	3.60355	0.177714	0.999043	chr7	152157761	152163826	-	5	GTAG	CTACTATTCTCAGTTGATCTACAAG	CATGTTCTTTCTGTTGTTTACGAAT	KMT2C,
chr21 : 15766141 - 15762891 : USP25,	0	0	0	0	6.27773	3.4361	0	0	5.48018	0	3.59903	0.178212	0.999043	chr21	15766141	15762891	+	6	GTAG	AGTGTGGGAAGCCAAGCAGATACAA	GTTGATTCAAAAACGTCTGCTGGTG	USP25,
chr6 : 116705160 - 116689320 : KPNA5,	0	0	0	0	4.7083	0	6.66805	0	0	3.7624	3.59019	0.180288	0.999043	chr6	116705160	116689320	+	6	GTAG	GTGAAATACTTCCACCTCTTTTAGA	TCTTTCCCTGGACTAGCCATGGCAT	KPNA5,
chr7 : 158918869 - 158869855 : WDR60,	6.78107	0	4.53172	6.13768	2.35415	2.74888	27.7835	16.7025	0	12.7922	1.21873	0.182278	0.999043	chr7	158918869	158869855	+	6	GTAG	AACACCAGTCTACCATTCCTTCAAA	TCCAGGTATCATCTTTGGTTCTTCT	WDR60,
chr18 : 56758953 - 56731383 : WDR7,	0	0	0	0	3.13886	4.12332	7.77939	0	0	0	3.58044	0.182509	0.999043	chr18	56758953	56731383	+	6	GTAG	ATTGTGCAAGGACAGATTAAACAAG	CCCATCACACAACGATCCAATGCAC	WDR7,
chr20 : 35653528 - 35659014 : RBM12,CPNE1,	0	0	3.39879	0	8.63188	4.81054	0	9.66988	0	3.7624	2.40058	0.184904	0.999043	chr20	35653528	35659014	-	5	GTAG	CAGTTTAAAAATGAAGATGATGCAC	CAACCAATTAAAACCAACTTTTAGA	RBM12,CPNE1,
chr11 : 43446014 - 43446706 : TTC17,	12.2059	0	4.53172	6.90489	3.92358	0	0	3.51632	0	0	-2.23892	0.185949	0.999043	chr11	43446014	43446706	-	0	CAGC	CTCTCCATCTGGTTCACAAGGATAT	TTCGTAAATTCCTATAATATAAAAA	TTC17,
chr5 : 179593645 - 179580947 : RUFY1,	0	0	0	0	0	0	0	5.27448	12.0564	0	3.77939	0.186206	0.999043	chr5	179593645	179580947	+	6	GTAG	TTTACAGATGTTTCACAAAGCTCAG	AAGGACATCAGTAATTCTTTCATGC	RUFY1,
chr10 : 100926019 - 100923975 : SLF2,	6.78107	0	0	6.90489	10.986	13.7444	0	21.0979	5.48018	2.25744	1.35618	0.1894	0.999043	chr10	100926019	100923975	+	6	GTAG	TGAAGGAAATGGAAGACACACAAAG	GGGAATTTATTCTGCTTAGAGCCTG	SLF2,
chr18 : 50932360 - 50918110 : ME2,	0	0	0	0	3.92358	7.55941	0	0	0	3.00992	3.5426	0.189747	0.999043	chr18	50932360	50918110	+	6	GTAG	GGAAACAATGTTTATATTTTTCCAG	TGTAAAATGGGTCTTTTAAGAGTGC	ME2,
chr3 : 33400189 - 33425741 : UBP1,	0	0	0	0	8.63188	3.4361	0	0	0	2.25744	3.52349	0.194714	0.999043	chr3	33400189	33425741	-	5	GTAG	ACAAGACTGTTCTCTAATTTTTCAG	GAAAATGGGCAATGCCAAGACATCA	UBP1,
chr11 : 13413530 - 13421838 : BTBD10,	0	0	0	0	3.13886	0	6.66805	0	0	4.51488	3.50962	0.197024	0.999043	chr11	13413530	13421838	-	5	GTAG	AGCACTATTAAATGTAGAGATCTCA	TCCTTTAGCAATACGCGAGGAAGTA	BTBD10,
chr14 : 73103198 - 73106031 : RBM25,	0	0	6.79759	3.06884	0	0	0	0	0	0	-3.95382	0.202169	0.999043	chr14	73103198	73106031	-	0	CATC	TTTCCTTTTTGCCTTTCTCTTCTTC	GAAGATGAAGAAGATGCATACGAAC	RBM25,
chr3 : 105670233 - 105685466 : CBLB,	0	0	0	0	0	6.18498	0	0	5.48018	2.25744	3.47433	0.204945	0.999043	chr3	105670233	105685466	-	5	GTAG	TATGATCAGCTTCCTTCATGTTCAG	AGAATTTGCTAACGGACCAGTACAC	CBLB,
chr15 : 41669958 - 41668828 : MGA,	5.42486	8.49881	7.93052	3.83605	3.92358	3.4361	0	5.27448	0	0	-1.57315	0.209123	0.999043	chr15	41669958	41668828	+	6	GTAG	AATTGAAGCAAGAGATTTCTGAATG	ACATAGTCACAATGGCCTTCCCATC	MGA,
chr15 : 44503850 - 44497027 : CTDSPL2,	0	0	0	0	3.92358	0	4.44537	0	5.48018	0	3.45417	0.209278	0.999043	chr15	44503850	44497027	+	6	GTAG	TCAGCTGTCCAGAAATCAGATTGTG	CGGGACATGTTTGATGAAATAATAG	CTDSPL2,
chr6 : 144523188 - 144513909 : UTRN,	0	5.66588	0	3.83605	0	0	0	0	0	0	-3.89218	0.209546	0.999043	chr6	144523188	144513909	+	6	GTAG	ATAGAATGTACAGTGATCGGAAAGG	ATATTTCTAGCTGGTTCTGATGGTT	UTRN,
chr1 : 171584526 - 171579354 : PRRC2C,	0	0	0	0	0	3.4361	0	8.7908	0	1.50496	3.45763	0.210335	0.999043	chr1	171584526	171579354	+	6	GTAG	CCAGTCACCAAGTGCTCTCCAGCAG	TCCATATAGAAGGCTGGGATTTGAG	PRRC2C,
chr1 : 114719579 - 114738072 : CSDE1,	8.13729	8.49881	0	0	0	0	3.33402	0	0	0	-3.06388	0.211219	0.999043	chr1	114719579	114738072	-	5	GTAG	GCGCCTGTAATGTTTGGCGAGTCTG	GATGATACTTCAAATTCAACATCAT	CSDE1,
chr3 : 197832317 - 197814908 : LRCH3,	0	0	0	0	0	2.06166	0	5.27448	0	6.01984	3.41976	0.215745	0.999043	chr3	197832317	197814908	+	6	GTAG	AGTTTGGTAGTAACAAACGGCGGAG	TCTGAAAGGCGATTTCGCGACAGGT	LRCH3,
chr6 : 13584225 - 13579451 : SIRT5,	42.0427	16.9976	20.3928	4.60326	23.5415	47.4181	14.4474	52.7448	29.593	32.3567	0.692913	0.21628	0.999043	chr6	13584225	13579451	+	6	GTAG	CTGAAAATGGCTCGGCCAAGTTCAA	ATATGTTAGAAAACATTTCCATTTA	SIRT5,
chr18 : 24083081 - 24064140 : TTC39C,	0	0	2.26586	5.37047	3.13886	2.06166	0	0	19.7286	15.0496	1.71254	0.218034	0.999043	chr18	24083081	24064140	+	6	GTAG	CAAGGGACGGATACAACGACTAGAG	AAAACTCATTAGTGGGCTATGATTT	TTC39C,
chr18 : 56939393 - 56923922 : WDR7,	0	0	0	0	0	5.49776	3.33402	4.3954	0	0	3.40049	0.220215	0.999043	chr18	56939393	56923922	+	6	GTAG	AAGAATGTTTCCCAGCCATCTGCAG	AGCAGAAGAAACGTCAGTGCCTTGC	WDR7,
chr20 : 35713019 - 35725155 : RBM39,	0	0	0	0	4.7083	0	0	0	5.48018	3.00992	3.3933	0.221244	0.999043	chr20	35713019	35725155	-	5	GTAG	TCTTTGGCATTTGGTGCTGTGGCAG	AGGAGTTAAATTATCAATAGGTTCT	RBM39,
chr12 : 50441643 - 50427762 : LARP4,	6.78107	0	0	2.30163	0	3.4361	4.44537	7.91172	3.28811	19.5645	1.52259	0.222313	0.999043	chr12	50441643	50427762	+	6	GTAG	AACATTTCAGGGCAAGCCAATTATG	AACCAGTTCCTTTAGATGCTACCTG	LARP4,
chr15 : 63559970 - 63532647 : USP3,	0	0	5.66465	3.06884	0	0	0	0	0	0	-3.77978	0.2235	0.999043	chr15	63559970	63532647	+	6	GTAG	CCAGGAGCCAAGGGGATAACAATGT	CAAGGGCTTTTGTTGGACCGGCACA	USP3,
chr4 : 119273708 - 119267320 : USP53,	0	0	5.66465	3.06884	0	0	0	0	0	0	-3.77978	0.2235	0.999043	chr4	119273708	119267320	+	6	GTAG	CTTCAGAGCCAACATCACTTAGAAG	CAACATCTTTCCATCTAGTTCCAAT	USP53,
chr1 : 243613671 - 243843282 : AKT3,	43.3989	45.327	54.3807	38.3605	53.3607	18.5549	21.1155	22.8561	55.8978	37.624	-0.379	0.224481	0.999043	chr1	243613671	243843282	-	5	GTAG	GATGGAATATGTTAATGGGGGCGAG	TCCCACTCTCTAGTGATGACTCAGC	AKT3,
chr14 : 32094386 - 32090502 : ARHGAP5,	0	0	0	3.06884	0	3.4361	0	8.7908	5.48018	6.77232	2.26151	0.228513	0.999043	chr14	32094386	32090502	+	6	GTAG	CCACAAAGTGAAAGAAGATAAAAAG	CTTCAAGATCATAGGGATCATCTTC	ARHGAP5,
chr1 : 155921375 - 155925843 : KIAA0907,	0	0	0	0	0	0	0	0	12.0564	3.00992	3.57712	0.22903	0.999043	chr1	155921375	155925843	-	5	GTAG	GCAGCCTCCAGCTAGCACTGGACAG	ATAATTTATCTTGAACATAATGCAT	KIAA0907,
chr9 : 36352742 - 36357942 : RNF38,	0	0	0	0	10.986	0	0	0	0	3.7624	3.56209	0.231378	0.999043	chr9	36352742	36357942	-	5	GTAG	ATCCCAGCTTACTGCCATATGTGTT	AAACAGGGACTGTTCCTTGATGGAG	RNF38,
chr3 : 47635190 - 47636136 : SMARCC1,	5.42486	0	4.53172	8.43932	0	4.81054	0	0	0	0	-2.46756	0.236451	0.999043	chr3	47635190	47636136	-	5	GTAG	TGCCTCAGCGGCTACCAAAGCCAAG	TTTCATTTTCCACTTTATTTTCTGC	SMARCC1,
chr1 : 100499262 - 100494818 : CDC14A,	0	0	5.66465	0	5.49301	0	10.0021	0	7.67225	9.02976	1.90867	0.238543	0.999043	chr1	100499262	100494818	+	6	GTAG	GAGATTCCTGAGCCGTTCTATCCCT	CCACATCATCATCTTCTAAGTTATC	CDC14A,
chr6 : 75678927 - 75634707 : SENP6,	6.78107	0	0	7.6721	0	0	0	2.63724	0	0	-2.9801	0.241208	0.999043	chr6	75678927	75634707	+	6	GTAG	ATGTTATTATAGACTTTTATTTGAA	TAATGACGTATTTTGCGTATTTTCA	SENP6,
chr15 : 90629532 - 90619741 : CRTC3,	0	0	0	9.20653	6.27773	6.87219	5.55671	14.9444	7.67225	0	1.46092	0.248022	0.999043	chr15	90629532	90619741	+	6	GTAG	ACTGGCCCCATATCCTACCTCCCAG	GAGGGCGTCCTGACAGGGACTGAAT	CRTC3,
chr8 : 17286427 - 17268258 : VPS37A,	0	0	0	0	7.84716	0	0	0	0	6.01984	3.47378	0.249235	0.999043	chr8	17286427	17268258	+	6	GTAG	CAGCCAATTTCATGCTCCACTATAG	CTGAGGAAACTGTGGAGGAAGCAAT	VPS37A,
chr2 : 69509231 - 69527319 : AAK1,	0	11.3318	5.66465	2.30163	5.49301	0	0	0	0	0	-2.36413	0.251469	0.999043	chr2	69509231	69527319	-	5	GTAG	CTGAGGCCAGTCTCAATAAGTCCAA	TCAGGGTCTGGTTCCAACATATACC	AAK1,
chr10 : 101798842 - 101800400 : MGEA5,	0	0	0	0	1.56943	0	0	6.15356	4.38414	0	3.26539	0.251863	0.999043	chr10	101798842	101800400	-	5	GTAG	TTGCAAAGGAAAAGACTCTGAAAAA	GACACAGTACTATCTTCACTGTCAG	MGEA5,
chr7 : 158906091 - 158869855 : WDR60,	0	0	0	0	0	0	6.66805	7.03264	0	0	3.44192	0.257109	0.999043	chr7	158906091	158869855	+	6	GTAG	GTCGGACTCAGGCCCTTAAGCAAAA	TCCAGGTATCATCTTTGGTTCTTCT	WDR60,
chr8 : 144789851 - 144791316 : RPL8,	5.42486	0	0	0	7.84716	0	10.0021	7.03264	0	4.51488	1.91177	0.257234	0.999043	chr8	144789851	144791316	-	3	CTGC	GTGGGTCTCATTGCTGCCCGCCGGA	TGGCTGAGGAGATAACCTTCTTGGA	RPL8,
chr16 : 68191775 - 68174374 : NFATC3,	0	0	0	0	0	0	3.33402	4.3954	0	3.7624	3.19354	0.265233	0.999043	chr16	68191775	68174374	+	6	GTAG	CTGCAGGACATCACTTTAGATGATG	GGAAGTTCTTGAGCAGACCGCTGGG	NFATC3,
chr1 : 31915895 - 31919658 : PTP4A2,	2.71243	0	5.66465	9.20653	5.49301	3.4361	8.89073	7.03264	16.4405	10.5347	0.88332	0.265326	0.999043	chr1	31915895	31919658	-	5	GTAG	TGAAAAAGAAGGAATCCACGTTCTA	TGCAACGTATATTCCAACGAAAAAC	PTP4A2,
chr2 : 42264731 - 42256501 : EML4,	9.4935	4.24941	3.39879	0	4.7083	0	0	0	0	0	-2.40919	0.265627	0.999043	chr2	42264731	42256501	+	6	GTAG	CATAAAGATGTCATCATCAACCAAG	ATAACTGCTCGAGGGCTTGGTTGGC	EML4,
chr17 : 38850425 - 38853707 : RPL23,	0	0	0	0	0	4.81054	0	0	0	8.27728	3.39338	0.266853	0.999043	chr17	38850425	38853707	-	0	GCTG	CGAAAGTCATACCGTAGAAAAGATG	GAAACAAAACCTCACCTCGCTTCGA	RPL23,
chr18 : 9208803 - 9182382 : ANKRD12,	0	0	0	0	7.84716	0	0	5.27448	0	0	3.39077	0.268023	0.999043	chr18	9208803	9182382	+	6	GTAG	ATGACAGCAAGAGACAACAGTCCAG	TTTTATCAGTCTTCTCATCCTGGAT	ANKRD12,
chr10 : 17233620 - 17237262 : VIM,	2.71243	0	0	0	0	2.06166	6.66805	0	6.57621	3.7624	2.32161	0.268526	0.999043	chr10	17233620	17237262	-	5	GTAG	GCAAAGATTCCACTTTGCGTTCAAG	CGAAACTTCTCAGCATCACGATGAC	VIM,
chr1 : 35361789 - 35358925 : ZMYM4,	0	0	5.66465	3.06884	6.27773	2.74888	6.66805	0	4.38414	15.0496	1.37417	0.270922	0.999043	chr1	35361789	35358925	+	6	GTAG	AAAAGATGAACCTGACAATGCTCAA	ATTTCTGTATCCATGATACCACCAC	ZMYM4,
chr11 : 128459666 - 128460219 : ETS1,	8.13729	18.4141	7.93052	10.7409	0	6.87219	12.2248	8.7908	8.76828	4.51488	-0.736871	0.272521	0.999043	chr11	128459666	128460219	-	0	TGGT	CCAGAGACCATCCCAGGAAGAGTGG	AATGTAGTCCAAACAGTTCCACCCA	ETS1,
chr14 : 91780576 - 91813825 : TC2N,CATSPERB,	0	0	0	0	0	4.12332	0	8.7908	0	0	3.36814	0.272941	0.999043	chr14	91780576	91813825	-	5	GTAG	CTCATTCCTAACAGTGGATTTACTT	ACAAACTTCCAATCTTAATATTAAT	TC2N,CATSPERB,
chr2 : 85049648 - 85043564 : KCMF1,	0	0	0	0	0	0	0	0	7.67225	5.26736	3.36173	0.274436	0.999043	chr2	85049648	85043564	+	6	GTAG	AGAATTCCCAGTTTCTTTTAACAAG	GTAACGCTGCACATATTGGACAAAT	KCMF1,
chr6 : 149379518 - 149342685 : TAB2,	0	0	0	0	0	4.12332	0	2.63724	4.38414	0	3.15036	0.274533	0.999043	chr6	149379518	149342685	+	6	GTAG	TCTGATGATGCTGCCTACACACAAG	CAGGTCCAGGAACTGGGTCTGGAGC	TAB2,
chr12 : 123345258 - 123350441 : SBNO1,	0	0	0	9.20653	7.84716	4.12332	0	1.75816	5.48018	21.0694	1.44513	0.275662	0.999043	chr12	123345258	123350441	-	5	GTAG	GCTCAGCCAGTAGCAACAGCAGCTA	GTAAATCTTGCCCTGGCTCCACCAT	SBNO1,
chr5 : 57246300 - 57251141 : GPBP1,	32.5492	29.7459	21.5257	31.4556	23.5415	14.4316	16.6701	28.1305	21.9207	31.6042	-0.339439	0.277609	0.999043	chr5	57246300	57251141	-	3	CTGC	CTAGATTTAGGATTCGGAGGATATT	CAAGTTCACTTGAGGCAGAACACAG	GPBP1,
chr14 : 73103266 - 73105950 : RBM25,	0	0	0	0	0	0	6.66805	6.15356	0	0	3.34551	0.278414	0.999043	chr14	73103266	73105950	-	0	CTCT	CCTTTCTCGTTCCCTTTCACGCTCC	GAACGAGAACGGGAGCGAGAGAGAG	RBM25,
chr6 : 138907495 - 138914761 : REPS1,	0	4.24941	0	0	0	11.6827	3.33402	0	12.0564	0	2.15715	0.279272	0.999043	chr6	138907495	138914761	-	5	GTAG	TAGCGAATTGCAGCAACAATTAAAG	GCAACAACTCCAGCCTGTTGTTGTC	REPS1,
chr10 : 11997672 - 12014184 : UPF2,	0	0	0	0	0	3.4361	4.44537	0	0	3.00992	3.11859	0.280584	0.999043	chr10	11997672	12014184	-	5	GTAG	CACTCTTCATAGTTCCTAGACAAAG	CTCCCCTTTAGAATGTAGAATGCGC	UPF2,
chr4 : 102304317 - 102315830 : SLC39A8,	0	0	0	0	7.06245	0	5.55671	0	0	0	3.32738	0.282332	0.999043	chr4	102304317	102315830	-	5	GTAG	TAATGTCAGTGTGGTATCTCTACAG	AAAAGATCTCTTCAGCAGTTAAACA	SLC39A8,
chr1 : 243545510 - 243843282 : AKT3,	25.7681	11.3318	21.5257	5.37047	16.479	7.55941	11.1134	13.1862	7.67225	9.78224	-0.514303	0.283892	0.999043	chr1	243545510	243843282	-	5	GTAG	CTGGCAAGATGTATATGATAAAAAG	TCCCACTCTCTAGTGATGACTCAGC	AKT3,
chr9 : 33948374 - 33956146 : UBAP2,	5.42486	4.24941	4.53172	9.20653	13.3402	9.62107	10.0021	7.91172	7.67225	8.27728	0.656825	0.284684	0.999043	chr9	33948374	33956146	-	5	GTAG	CAGTCCTCAGTCCTCAGTCATCTTG	CAGTGAAGACCTTTGTTTCAGAAAG	UBAP2,
chr10 : 49915917 - 49935142 : PARG,	13.5621	14.1647	7.93052	13.0426	9.41659	15.806	12.2248	0	0	3.7624	-0.810165	0.284866	0.999043	chr10	49915917	49935142	-	5	GTAG	AGCTTTGATCGATTTCTGGGATAAG	CTGGTAATAGTCTTTTGTTTGAAAA	PARG,
chr3 : 136464881 - 136502779 : STAG1,	0	0	0	0	0	2.74888	0	2.63724	0	5.26736	3.09679	0.285598	0.999043	chr3	136464881	136502779	-	5	GTAG	CAGCTGGAGAGTTCCTTCACAAAAA	ACCAGAGCAGTCATGAGCTTCATGG	STAG1,
chr1 : 113833111 - 113855049 : PTPN22,	0	0	0	0	0	4.81054	0	0	0	7.5248	3.30834	0.285625	0.999043	chr1	113833111	113855049	-	5	GTAG	GTAAAACTCCGAAGTCCTAAATCAG	GAAACTGGTAGATAGTTCGAGTTTC	PTPN22,
chr9 : 37147445 - 37126312 : ZCCHC7,	6.78107	7.08235	14.7281	4.60326	18.0485	15.1188	15.5588	14.0653	4.38414	6.77232	0.589909	0.28576	0.999043	chr9	37147445	37126312	+	6	GTAG	AATATTGGCTGATGTAGAGCTATAG	TCATAAAAAGTCAGTAACCTTGAAG	ZCCHC7,
chr9 : 19378432 - 19379552 : RPS6,	28.4805	14.1647	5.66465	16.1114	14.9096	12.37	10.0021	0	6.57621	18.0595	-0.619039	0.285816	0.999043	chr9	19378432	19379552	-	0	TTTT	AAGAGCTAGCAGAATCCGCAAACTT	CCATACGCTTCTCATAGAAAGTACG	RPS6,
chr5 : 139614966 - 139600372 : UBE2D2,	0	9.91528	0	14.577	15.6943	13.0572	3.33402	7.91172	16.4405	18.812	1.00717	0.285899	0.999043	chr5	139614966	139600372	+	6	GTAG	TCTCCAGCACTAACTATTTCAAAAG	GGTCCCGTGCCAGATCATTCAATTC	UBE2D2,
chr14 : 73103287 - 73105945 : RBM25,	0	0	0	0	0	0	0	7.03264	5.48018	0	3.31201	0.285969	0.999043	chr14	73103287	73105945	-	0	TCTC	CCTTTCTCGTTCCCGTTCTCGCCTT	AGCGAGAACGAGAACGGGAGCGAGA	RBM25,
chr7 : 140776912 - 140794467 : BRAF,	0	0	0	0	7.84716	0	0	0	0	4.51488	3.30827	0.286093	0.999043	chr7	140776912	140794467	-	5	GTAG	CACGACAGACTGCACAGGGCATGGA	AGACGGACTGGTGAGAATTTGGGGC	BRAF,
chr5 : 180261684 - 180280608 : MAPK9,	0	0	0	0	4.7083	0	0	0	0	7.5248	3.29374	0.289317	0.999043	chr5	180261684	180280608	-	5	GTAG	GCATTCAGCTGGTATAATTCATAGA	CGAAGGGTGGGCAAGTTTCAGATCC	MAPK9,
chr18 : 76868863 - 76849526 : ZNF236,	0	0	0	0	0	0	5.55671	0	0	6.77232	3.29479	0.289556	0.999043	chr18	76868863	76849526	+	6	GTAG	ACATGAAGACTCATTACAAAATTAG	TCCGCATTCAATGTTAAAACTCCAT	ZNF236,
chr15 : 44551522 - 44550876 : EIF3J,	0	0	0	0	0	0	4.44537	7.91172	0	0	3.29471	0.29055	0.999043	chr15	44551522	44550876	+	6	GTAG	AAGGCAAGAAGAAATTAAAAAGAGG	CATCATCATCGTCATCCCAGTTATC	EIF3J,
chr9 : 121166180 - 121161856 : CNTRL,	8.13729	0	14.7281	7.6721	17.2638	13.7444	6.66805	8.7908	14.2485	10.5347	0.616695	0.290563	0.999043	chr9	121166180	121161856	+	6	GTAG	AGACCATTTGAACCTAGCAAAACAG	AACATGTCCAGAATATTCTTTAGTT	CNTRL,
chr20 : 35716740 - 35732135 : RBM39,	0	0	0	0	0	0	0	0	5.48018	6.77232	3.28635	0.291632	0.999043	chr20	35716740	35732135	-	5	GTAG	ATCCAAGGGATATGGATTTATTACA	ACTTCTGCTCTTGCTTTTTTTCCTC	RBM39,
chr15 : 57234107 - 57231152 : TCF12,	0	0	2.26586	0	3.13886	7.55941	3.33402	0	3.28811	0	2.27319	0.293299	0.999043	chr15	57234107	57231152	+	6	GTAG	TGCACTTGGAAAGGCTTTGGCATCT	CTGAATTTGGGGATGGTGCATATAC	TCF12,
chr1 : 26732792 - 26729651 : ARID1A,	92.2226	109.068	86.1027	92.0653	77.6869	157.373	138.918	101.973	128.236	70.7331	0.245671	0.294254	0.999043	chr1	26732792	26729651	+	6	GTAG	TCAGTCAAGACCCTCCAGCTTGCCT	CCATCTGATCCATTGGACTGGATGG	ARID1A,
chr5 : 103096541 - 103097781 : GIN1,	0	0	0	4.60326	9.41659	4.81054	0	6.15356	0	6.01984	1.82306	0.29533	0.999043	chr5	103096541	103097781	-	5	GTAG	TACATAAGAGAATCCAGTGAACAAG	ACAATCTGTACAGTTCAATATTGAT	GIN1,
chr12 : 2681654 - 2682612 : CACNA1C,	0	0	0	0	3.92358	2.06166	0	0	4.38414	0	3.04597	0.29716	0.999043	chr12	2681654	2682612	-	5	GTAG	CCCGCAGTGGAAGGAAAGATGAGAG	AGGAGGAGACGTCTCAGGATGAGAC	CACNA1C,
chr2 : 68545312 - 68490190 : APLF,	12.2059	7.08235	10.1964	8.43932	13.3402	0	4.44537	4.3954	3.28811	6.77232	-0.811546	0.302093	0.999043	chr2	68545312	68490190	+	6	GTAG	GTCCCTATGGACCATCCTGTTATAG	TTCTGGATACTCTCTTGTCTGTTAT	APLF,
chr5 : 73554322 - 73561288 : ANKRA2,	0	0	0	0	0	2.06166	0	3.51632	0	4.51488	3.0176	0.302687	0.999043	chr5	73554322	73561288	-	5	GTAG	GTGAAATGTGTAAAGATGCTCTTAG	GGAGATGTATGGATATTGCATTCAG	ANKRA2,
chr6 : 34606555 - 34646798 : C6orf106,	0	0	0	0	6.27773	0	5.55671	0	0	0	3.23399	0.303213	0.999043	chr6	34606555	34646798	-	5	GTAG	CTTATCAGTAGTGACTTACAGTAAG	ACCCCTGGAGGCCAGGCCTCTGCCC	C6orf106,
chrX : 77652114 - 77664778 : ATRX,	0	0	0	0	2.35415	4.12332	0	3.51632	0	0	3.00397	0.305524	0.999043	chrX	77652114	77664778	-	5	GTAG	GCGTGAGCGAGAAAAATTGAGAGAG	TTCTAAAAGCATCTTCTTGGCAATT	ATRX,
chr14 : 73282359 - 73287314 : NUMB,	0	0	0	0	3.92358	7.55941	0	0	0	0	3.20594	0.307552	0.999043	chr14	73282359	73287314	-	5	GTAG	GCACCACAATCTCCTACCTTCCAAG	CTACTGCATGGCTCAACCTTTCACC	NUMB,
chr1 : 108699273 - 108699646 : PRPF38B,	0	0	0	0	0	0	4.44537	3.51632	2.19207	0	3.00332	0.308795	0.999043	chr1	108699273	108699646	-	0	TCTT	ACGCTCTAGTCGCTGGCGTTCTTTC	GACAAAAGAGATTCCAAGAAAGAGA	PRPF38B,
chr1 : 226265533 - 226287797 : LIN9,	0	0	0	0	7.06245	0	4.44537	0	0	0	3.19547	0.309163	0.999043	chr1	226265533	226287797	-	5	GTAG	TCCAGTAGAATTTCTTATCCAAGTG	GTGTTGACATTGTTGCTGTAAATTT	LIN9,
chr5 : 50797233 - 50750151 : PARP8,	0	0	0	0	0	0	4.44537	7.03264	0	0	3.18748	0.310396	0.999043	chr5	50797233	50750151	+	6	GTAG	GTTTCAAAATGGCCCTATGCTTAGG	AGATACATGTACTGAGTAGGATACA	PARP8,
chr1 : 52515891 - 52526373 : ZCCHC11,	4.06864	4.24941	6.79759	2.30163	10.2013	6.18498	7.77939	3.51632	6.57621	9.78224	0.776854	0.310659	0.999043	chr1	52515891	52526373	-	5	GTAG	AGATCACATCTTTCGACTTGAAAAA	TTCAAGTCCAGTTTAGGCAAGCAAA	ZCCHC11,
chr2 : 40428473 - 40430304 : SLC8A1,	0	0	0	0	0	3.4361	0	7.91172	0	0	3.18173	0.311285	0.999043	chr2	40428473	40430304	-	5	GTAG	TCGAATTCCAGAATGATGAAATTGT	TGACACTTCCAACTGTCACAACCTA	SLC8A1,
chr6 : 144523188 - 144510944 : UTRN,	0	0	0	0	0	0	4.44537	0	0	6.77232	3.1598	0.314692	0.999043	chr6	144523188	144510944	+	6	GTAG	ATAGAATGTACAGTGATCGGAAAGG	TCTTTTCCAGATCCTTCAGAACATT	UTRN,
chr7 : 26195845 - 26197462 : HNRNPA2B1,	0	0	0	0	0	4.12332	0	7.03264	0	0	3.15815	0.314949	0.999043	chr7	26195845	26197462	-	0	CAAA	TGGGTATGGAGGAGGACCTGGAGGT	TTTGCTTGCAGGATCCCTCATTACC	HNRNPA2B1,
chr20 : 2965202 - 2964272 : PTPRA,	21.6994	21.247	26.0574	26.8524	31.3886	25.4271	22.2268	19.3398	58.0899	27.0893	0.329104	0.316449	0.999043	chr20	2965202	2964272	+	6	GTAG	ACTCCAGAAACTTTCCCTCCTTCAG	GAATGAACCAGGAATCCATGCTTAT	PTPRA,
chr1 : 222943332 - 222942807 : DISP1,	0	0	0	0	0	2.74888	0	0	0	8.27728	3.14666	0.316745	0.999043	chr1	222943332	222942807	+	6	GTAG	TGCAACAGCACATAGCCAACATAAG	ATAGCCATGCTCCAATTTCTTGACT	DISP1,
chr11 : 130260856 - 130261929 : ZBTB44,	5.42486	16.9976	6.79759	5.37047	6.27773	5.49776	0	5.27448	0	9.78224	-0.900908	0.320038	0.999043	chr11	130260856	130261929	-	5	GTAG	ATTAGTCCACAGTCTTCCTCTATAG	AGGATGCAAATAAATCAGAAATGTC	ZBTB44,
chr5 : 36986301 - 36953618 : NIPBL,	0	0	0	0	7.84716	0	0	0	0	3.00992	3.12154	0.320696	0.999043	chr5	36986301	36953618	+	6	GTAG	AATAAACCATCAAAGTCAAATAAAG	GTCATTACTTCCCATTTCCCAAACA	NIPBL,
chr4 : 128028853 - 128017363 : ABHD18,	6.78107	0	0	3.83605	0	2.06166	0	0	0	0	-2.73213	0.323761	0.999043	chr4	128028853	128017363	+	6	GTAG	TGTACTCATGTAGCAAATTTCTCAG	GGACACATTTTTTAAGCTGGACCTT	ABHD18,
chrX : 132437899 - 132441567 : MBNL3,	0	8.49881	16.994	0	4.7083	26.1143	8.89073	3.51632	39.4573	5.26736	1.20714	0.324194	0.999043	chrX	132437899	132441567	-	5	GTAG	GAAACTTGTTATTGTAAAGATAAAG	CTAGGAAAAGTATTTTAAAAATAAC	MBNL3,
chr13 : 45975283 - 45980004 : ZC3H13,	0	0	0	0	3.13886	0	0	0	7.67225	0	3.09798	0.324429	0.999043	chr13	45975283	45980004	-	5	GTAG	ATGGACATGATGAAAGAAAATCAAA	TGAGAACCTCTTGAGCCTCGACTTC	ZC3H13,
chr13 : 20006586 - 20002850 : ZMYM2,	0	0	0	0	0	0	0	6.15356	0	4.51488	3.09257	0.32529	0.999043	chr13	20006586	20002850	+	6	GTAG	AAGTTGTGTCAGTGAATACAAACAG	GAAGCTGACTGGGAGATCCAAGAAT	ZMYM2,
chr1 : 20941491 - 20950108 : EIF4G3,	0	0	0	0	0	2.74888	0	7.91172	0	0	3.09121	0.325507	0.999043	chr1	20941491	20950108	-	5	GTAG	AATTCAAGAAGGAGCCCTGTCCCAG	TGTGCTCGGGGACCTGGCTGGGCAG	EIF4G3,
chr12 : 9694969 - 9680923 : CLEC2D,	0	0	0	0	0	7.55941	0	0	0	3.00992	3.08842	0.325953	0.999043	chr12	9694969	9680923	+	6	GTAG	AAGAATTTATTTCTTATACCAACAG	GAATGCTCTTTTGAATGCAGACAAC	CLEC2D,
chr12 : 28307749 - 28255581 : CCDC91,	16.2746	12.7482	16.994	0	3.13886	12.37	7.77939	0	0	4.51488	-1.2953	0.328062	0.999043	chr12	28307749	28255581	+	6	GTAG	TCAAGATAGATACAAAGAACTTCAG	TAAGCAGGTCATCCACGTATAGCAC	CCDC91,
chr8 : 17286427 - 17265907 : VPS37A,	0	0	0	0	0	2.74888	0	3.51632	0	3.00992	2.89647	0.328075	0.999043	chr8	17286427	17265907	+	6	GTAG	CAGCCAATTTCATGCTCCACTATAG	CACATCTTTCTGTATTTCGGCTATA	VPS37A,
chr2 : 202556531 - 202555252 : BMPR2,	8.13729	11.3318	4.53172	7.6721	0	6.87219	6.66805	7.91172	3.28811	0	-0.94522	0.33138	0.999043	chr2	202556531	202555252	+	6	GTAG	GTCCTGGATGGCAGCAGTATACAGA	CACACGCCTATTATGTGACAGGTTG	BMPR2,
chr1 : 28027789 - 28042650 : EYA3,	0	0	0	0	0	0	0	0	4.38414	6.01984	3.0509	0.331975	0.999043	chr1	28027789	28042650	-	5	GTAG	GCACATTATTCTTATCCCATTCAAG	ACTGACATCTGGATTGCTTACTTGA	EYA3,
chr9 : 107325004 - 107300141 : RAD23B,	0	0	0	0	3.13886	2.74888	3.33402	0	0	0	2.87903	0.332754	0.999043	chr9	107325004	107300141	+	6	GTAG	TCAGGAAAAAGAAGCTATAGAAAGG	CAATCTTCTCTTTCAGTGCTTTCAC	RAD23B,
chr15 : 75411492 - 75413045 : SIN3A,	0	0	14.7281	20.7147	15.6943	17.8677	13.3361	28.1305	20.8247	6.77232	0.910373	0.333983	0.999043	chr15	75411492	75413045	-	5	GTAG	CCTGGAGATTTTGCACACATATCAG	ACTAATCACTCCTGGGGTGTCGATG	SIN3A,
chr14 : 73173707 - 73147795 : PSEN1,	0	0	0	0	0	0	0	0	6.57621	3.7624	3.03591	0.334402	0.999043	chr14	73173707	73147795	+	6	GTAG	TCTGTATAAATACAGGTGCTATAAG	TCACTTGCAGGCTCCCAGATTAGGT	PSEN1,
chr2 : 42284703 - 42261121 : EML4,	0	0	0	0	0	0	0	0	6.57621	3.7624	3.03591	0.334402	0.999043	chr2	42284703	42261121	+	6	GTAG	AGCTGGCGTGGATAAAGATGGAAGG	TTTTTCTTTCTTTTTTTCTGTACCA	EML4,
chr2 : 202971738 - 202969919 : CARF,	0	0	0	0	0	4.81054	0	0	5.48018	0	3.03454	0.334623	0.999043	chr2	202971738	202969919	+	6	GTAG	TGTATGCAGTAAGGAAACAGCTAAG	CTTCTGTACCTTTTTAATGTAAATC	CARF,
chr5 : 62363899 - 62347130 : KIF2A,	0	0	0	2.30163	4.7083	2.74888	5.55671	3.51632	0	0	2.07912	0.335617	0.999043	chr5	62363899	62347130	+	6	GTAG	TAATAAAAGCCTTTTAGCACTCAAG	GTTACCATTGCTTGATGTATTCGGC	KIF2A,
chr15 : 69261329 - 69210316 : GLCE,	0	0	0	0	0	4.12332	0	0	0	6.01984	3.02797	0.335691	0.999043	chr15	69261329	69210316	+	6	GTAG	AATGTCAAACAGTTTATTGCACCAG	AAAACTTCAGTTTCTTGTCAAATTC	GLCE,
chr14 : 96860735 - 96833467 : VRK1,	0	8.49881	3.39879	4.60326	3.92358	9.62107	7.77939	12.3071	4.38414	5.26736	0.810786	0.337178	0.999043	chr14	96860735	96833467	+	6	GTAG	TTTGAAAGCAAAAACAATAACAAAG	GCTGCTTTTACACGAGGCATTTTCA	VRK1,
chr3 : 172381093 - 172362633 : FNDC3B,	0	0	0	0	0	0	6.66805	3.51632	0	0	3.00917	0.338758	0.999043	chr3	172381093	172362633	+	6	GTAG	TGGAAGAGAATCTGAGTACAAACAG	TTCATTTATAGCCTGAATTCTGATC	FNDC3B,
chr2 : 189720787 - 189719572 : ANKAR,	0	0	0	0	0	0	0	7.03264	0	3.00992	3.00433	0.339549	0.999043	chr2	189720787	189719572	+	6	GTAG	ATCAGATTTCTGAGTTCTGATTCAG	AGATTGATTAAGGCAGGAATGGTGC	ANKAR,
chr18 : 20984466 - 20991198 : ROCK1,	0	0	0	0	0	3.4361	6.66805	0	0	0	3.00304	0.339761	0.999043	chr18	20984466	20991198	-	0	CTGA	CTGTTGTTACAAAATGAATTGAAGA	ACCACACATTGCCACAGACTTTGCC	ROCK1,
chr1 : 89108163 - 89110227 : GBP2,	0	0	0	0	5.49301	0	0	0	4.38414	0	2.97373	0.344588	0.999043	chr1	89108163	89110227	-	0	CAAG	TAACATACTCTAAAAGTCCAAGGAG	TCTGTAGAAGTGCATCAGCCACATC	GBP2,
chr3 : 71015549 - 71053773 : FOXP1,	10.8497	5.66588	4.53172	20.7147	0	0	0	12.3071	0	9.02976	-1.55195	0.344857	0.999043	chr3	71015549	71053773	-	5	GTAG	GCGAAGATTTCCAATCATTTCTAAA	TCATCATAGCCACTGACACGGGAAC	FOXP1,
chr19 : 55386576 - 55388336 : RPL28,	0	0	0	0	0	6.18498	0	3.51632	0	0	2.9617	0.34658	0.999043	chr19	55386576	55388336	-	0	GGGG	AGGAATTGCGGGCCTTCAAGTTATT	CGCCCCACCAAGAGCTCCTGAGCCC	RPL28,
chr15 : 25405461 - 25411971 : UBE3A,	0	0	0	2.30163	4.7083	3.4361	0	3.51632	4.38414	0	2.04036	0.347435	0.999043	chr15	25405461	25411971	-	5	GTAG	CTGACGACATTGAAGCTAGCCGAAT	AATCAGGCTCTTACAGATTTTTAAC	UBE3A,
chr5 : 66054951 - 66053406 : ERBIN,	8.13729	7.08235	5.66465	9.20653	2.35415	4.81054	5.55671	4.3954	6.57621	4.51488	-0.698181	0.347842	0.999043	chr5	66054951	66053406	+	6	GTAG	TATTGAAGCCAAAAAGTTAGAAAAG	GCTGTTAAAATTTTCATCTTCTTGC	ERBIN,
chr1 : 151423397 - 151430841 : POGZ,	0	0	0	3.83605	5.49301	2.74888	0	0	24.1128	0	2.41496	0.348467	0.999043	chr1	151423397	151430841	-	5	GTAG	GTTCATAGTCCCTATGAATCTACTA	CCTTGCTGGACCAAAGGATTGCCAG	POGZ,
chr18 : 57611637 - 57615975 : NARS,	12.2059	5.66588	5.66465	8.43932	0	5.49776	3.33402	0	3.28811	12.7922	-0.928739	0.349427	0.999043	chr18	57611637	57615975	-	5	GTAG	TCAGTGTGTCTTGGCGGATGAGTTG	GTTCTTTCCCTACTGTCATCAAAGC	NARS,
chr7 : 77262307 - 77241691 : CCDC146,	0	0	0	0	3.13886	0	0	0	6.57621	0	2.94364	0.349586	0.999043	chr7	77262307	77241691	+	6	GTAG	ACTGCATCAAAGGCTTCTATTAGAG	CAGTTGGACCTCTGACTCTTGTGTG	CCDC146,
chr17 : 74203693 - 74209304 : RPL38,	16.2746	0	0	15.3442	0	19.9294	43.3423	15.8234	13.1524	27.0893	1.32223	0.350379	0.999043	chr17	74203693	74209304	-	0	AAGG	CACTCACAGCAAGCAGCAACCGGGG	CAGAGAAACTGAAGCAGTCCCTGCC	RPL38,
chr11 : 83169995 - 83161327 : PCF11,	0	0	0	0	0	4.12332	0	0	5.48018	0	2.9334	0.351299	0.999043	chr11	83169995	83161327	+	6	GTAG	AGGAAATATTCAGGCATCTCAACAG	CAGGAAGCTTCTCTGAGGAAGGAGC	PCF11,
chr2 : 71431428 - 71426460 : ZNF638,	0	0	0	0	0	4.12332	0	0	5.48018	0	2.9334	0.351299	0.999043	chr2	71431428	71426460	+	6	GTAG	TCAGTGGCGTCTGATGTCCCTGAGG	CCAAATTAAATGGAAATAATGGCTC	ZNF638,
chr16 : 30666541 - 30664215 : FBRS,	9.4935	9.91528	7.93052	2.30163	0	4.12332	7.77939	0	0	9.02976	-1.06937	0.351554	0.999043	chr16	30666541	30664215	+	6	GTAG	CGACCATTTCCGGCCACCTTTGAGG	GGCCTTGGGGGGCGGCCGTGAAGAG	FBRS,
chr21 : 29329693 - 29326059 : BACH1,	2.71243	0	9.06345	0	0	0	0	0	0	3.00992	-2.49274	0.352832	0.999043	chr21	29329693	29326059	+	6	GTAG	TCTTGAATCAGAAATTGAGAAGCTG	AAGGTTCAAATCCTTTAACTGTCAC	BACH1,
chr8 : 132727798 - 132757294 : TMEM71,	0	0	0	0	0	4.12332	0	5.27448	0	0	2.91287	0.354747	0.999043	chr8	132727798	132757294	-	5	GTAG	CAAGAGAATAGTTCGGATCATTCAG	TATTCTCTTTCCAACCTGGAAGAAC	TMEM71,
chrX : 77633207 - 77664778 : ATRX,	9.4935	4.24941	12.4622	3.06884	12.5555	3.4361	0	3.51632	0	2.25744	-0.976444	0.354867	0.999043	chrX	77633207	77664778	-	5	GTAG	TTTAACAAAGCTTTGGTTGATCCAG	TTCTAAAAGCATCTTCTTGGCAATT	ATRX,
chr9 : 37126942 - 37126312 : ZCCHC7,	6.78107	21.247	21.5257	24.5507	15.6943	18.5549	13.3361	9.66988	7.67225	20.317	-0.385126	0.355164	0.999043	chr9	37126942	37126312	+	6	GTAG	GGATGTGAAAACTCTGTTACTGAAG	TCATAAAAAGTCAGTAACCTTGAAG	ZCCHC7,
chr6 : 35619096 - 35646850 : FKBP5,	0	0	0	0	3.92358	0	5.55671	0	0	0	2.90983	0.355259	0.999043	chr6	35619096	35646850	-	5	GTAG	CCAAACGAAGGAGCAACAGTAGAAA	CTCCAAAGTGCTAGTCAGCAAACAC	FKBP5,
chr14 : 39179173 - 39180717 : PNN,	0	0	0	0	3.92358	0	0	0	5.48018	0	2.89894	0.357098	0.999043	chr14	39179173	39180717	-	0	CTTC	TTAGCACGCCTCTCTTCAAACAGTT	TGTAGAAATAGAGGAAGCAGGAGAG	PNN,
chr17 : 49298106 - 49298924 : ZNF652,	6.78107	5.66588	3.39879	4.60326	0	0	7.77939	0	0	3.7624	-1.43443	0.357902	0.999043	chr17	49298106	49298924	-	5	GTAG	TTATAATTTCATATCAGCTGATGAG	ATTTCACAGATAAAGGGTTTCTCTC	ZNF652,
chr18 : 37067545 - 37066890 : KIAA1328,	8.13729	0	0	9.97374	3.13886	0	0	0	4.38414	0	-1.88026	0.358807	0.999043	chr18	37067545	37066890	+	6	GTAG	ACCAGTCTCGACTGGATTACAATTG	GGAGAGTGCTTTTTCTACTGGATAC	KIAA1328,
chr15 : 92967513 - 92945821 : CHD2,	0	0	0	0	0	0	5.55671	0	0	3.7624	2.88584	0.359318	0.999043	chr15	92967513	92945821	+	6	GTAG	CAGCCCTTCAGAAACAGTATTACAA	AATGTAGATTTACTTGTCTTCACAG	CHD2,
chr4 : 153589007 - 153580826 : KIAA0922,	0	0	0	0	0	0	0	0	5.48018	3.7624	2.87479	0.361198	0.999043	chr4	153589007	153580826	+	6	GTAG	AATATAAAAATGGTGACGTCTGCAA	AGAGGCTAGTATTAGTGGTTTCTGC	KIAA0922,
chr10 : 28596041 - 28589736 : WAC,	0	0	0	0	0	4.81054	0	0	4.38414	0	2.87394	0.361343	0.999043	chr10	28596041	28589736	+	6	GTAG	CCTGCACAGAAAACAGAAAGAAAAG	ACCAGTCATCTGCAGAATCATAAGG	WAC,
chrX : 53411761 - 53415169 : SMC1A,	0	0	4.53172	5.37047	2.35415	0	0	0	0	0	-2.53994	0.361768	0.999043	chrX	53411761	53415169	-	5	GTAG	AGAACGGAAGAAAGTAGAGACAGAG	ATGGCATCCATGAGATTTGACTTAC	SMC1A,
chr1 : 155853276 - 155853806 : GON4L,	24.4119	12.7482	10.1964	17.6458	4.7083	17.8677	13.3361	10.549	10.9604	15.8021	-0.405332	0.362478	0.999043	chr1	155853276	155853806	-	5	GTAG	AGTGAAGAAGTCAAGGAAGAAGGAG	TTAAAAGTCCCACTTTTGTTCCATT	GON4L,
chr7 : 127373342 - 127377329 : ZNF800,	6.78107	0	0	3.06884	0	0	0	0	0	2.25744	-2.54988	0.363008	0.999043	chr7	127373342	127377329	-	5	GTAG	GTACAAGATCTAAGGCTCTTGTCTG	AAAATATGCTTAAGTTGTTTAGTTC	ZNF800,
chr15 : 83151215 - 83164075 : RP11-382A20.3,	0	0	0	0	0	5.49776	0	3.51632	0	0	2.85599	0.36441	0.999043	chr15	83151215	83164075	-	5	GTAG	AGACTTGCAGAAAACCAGTGAAGGG	CAGCGCCCTCTGGGAGTTCATCAAT	RP11-382A20.3,
chr5 : 112893038 - 112891603 : ZRSR1,CTC-487M23.8,REEP5,	0	0	0	0	0	5.49776	0	3.51632	0	0	2.85599	0.36441	0.999043	chr5	112893038	112891603	+	6	GTAG	CGAAGTCGTGGGAGGAGGAAGTCGG	GCCTGACCCCTCAGACATTCTTAAC	ZRSR1,CTC-487M23.8,REEP5,
chr16 : 53157541 - 53154447 : CHD9,	9.4935	4.24941	6.79759	0	0	3.4361	3.33402	0	0	4.51488	-1.42353	0.364615	0.999043	chr16	53157541	53154447	+	6	GTAG	AAATCACCTATGTTTACAGCGACAG	CACAAAGCTCCTTAATATTAGGGAC	CHD9,
chr1 : 117414831 - 117402186 : MAN1A2,	16.2746	14.1647	11.3293	8.43932	16.479	26.1143	18.8928	13.1862	9.86432	11.2872	0.388318	0.365943	0.999043	chr1	117414831	117402186	+	6	GTAG	TGAAGACAACCTTGATTTCAGTGTG	ATTTCTCAGACGTTCTTCCTCTTCC	MAN1A2,
chr5 : 131677703 - 131709272 : FNIP1,	0	5.66588	4.53172	10.7409	3.92358	0	0	0	0	6.77232	-1.53984	0.36657	0.999043	chr5	131677703	131709272	-	5	GTAG	TATAACCCACTTTGGGCACAACTGG	GGCATGTCCATTGGGTTGCTGTGAA	FNIP1,
chr10 : 43158931 - 43154897 : CSGALNACT2,	0	0	4.53172	4.60326	3.13886	4.12332	4.44537	8.7908	3.28811	6.01984	1.04495	0.366703	0.999043	chr10	43158931	43154897	+	6	GTAG	TTGTACAATTTATGCAGAACTTCAG	ATCCATTATATTGGTAGTGATTTTT	CSGALNACT2,
chr11 : 65502639 - 65503572 : AP000769.1,	9.4935	7.08235	0	0	5.49301	0	0	0	0	0	-2.14451	0.367096	0.999043	chr11	65502639	65503572	-	0	GTAA	ACTCAGAAGATGTTATCTGAAAAAA	TAAAATTTACATGTTGTGATGTAAA	AP000769.1,
chr3 : 170122591 - 170129552 : PHC3,	17.6308	35.4117	35.1209	33.7573	20.4026	57.7264	48.899	34.2841	47.1295	18.812	0.298957	0.367941	0.999043	chr3	170122591	170129552	-	5	GTAG	TTGACTTCTGAACATCCTTTGTTAG	TGAGGCTGAATTGGAGAATATGAAG	PHC3,
chr13 : 45975283 - 45989097 : ZC3H13,	0	0	0	0	0	2.74888	0	6.15356	0	0	2.83286	0.368386	0.999043	chr13	45975283	45989097	-	5	GTAG	ATGGACATGATGAAAGAAAATCAAA	ATGCTGTCCTGCTGGGGAAGTAGAC	ZC3H13,
chr1 : 246631924 - 246627356 : CNST,	0	0	0	0	0	0	4.44537	0	0	4.51488	2.83222	0.368497	0.999043	chr1	246631924	246627356	+	6	GTAG	GAATCCTATTTCCAGGAGGAGGACT	AGAAGCTGTCAGAAGGCCAGTGAAC	CNST,
chr18 : 56758953 - 56756583 : WDR7,	0	0	0	0	0	0	4.44537	0	0	4.51488	2.83222	0.368497	0.999043	chr18	56758953	56756583	+	6	GTAG	ATTGTGCAAGGACAGATTAAACAAG	TATGAGAATATTTAGGTAAATTTCC	WDR7,
chr1 : 113837590 - 113838620 : PTPN22,	0	0	0	0	0	0	0	3.51632	5.48018	0	2.83057	0.368781	0.999043	chr1	113837590	113838620	-	5	GTAG	TTGAACCAGGAGTCAGCTGTACTAG	CAGGAATACAATGCTTTGCTTGACT	PTPN22,
chr1 : 155921375 - 155921918 : KIAA0907,	0	0	0	0	4.7083	4.12332	0	0	0	0	2.82876	0.369094	0.999043	chr1	155921375	155921918	-	5	GTAG	GCAGCCTCCAGCTAGCACTGGACAG	CAAATCTAGAGTATTCAGCATGAAC	KIAA0907,
chr2 : 61278165 - 61281242 : USP34,	0	0	0	0	0	0	0	0	4.38414	4.51488	2.82309	0.370074	0.999043	chr2	61278165	61281242	-	5	GTAG	CTTTAAATTTTCAAGGGAAGGACAG	TGCATGATTCATGACGAACTGCAGT	USP34,
chr1 : 113834910 - 113855049 : PTPN22,	0	5.66588	13.5952	8.43932	10.986	9.62107	0	14.9444	25.2088	6.77232	0.670234	0.370577	0.999043	chr1	113834910	113855049	-	5	GTAG	TCATTTATTGTGGTTGAGGAAGCTG	GAAACTGGTAGATAGTTCGAGTTTC	PTPN22,
chr2 : 32116212 - 32114638 : SPAST,	0	0	0	0	0	0	0	3.51632	0	5.26736	2.81508	0.371461	0.999043	chr2	32116212	32114638	+	6	GTAG	TATTCTTCCTTCTCTGAGGCCTGAG	TTTCTTTTTGGAACAGCTCCACTTT	SPAST,
chr7 : 105077433 - 105073619 : KMT2E,	0	0	0	0	3.92358	4.81054	0	0	0	0	2.81364	0.371711	0.999043	chr7	105077433	105073619	+	6	GTAG	AAGCAAATGGGTATTTCTTTAAAAG	CACTGCCCTCTCTTTATCCAAATTC	KMT2E,
chr2 : 231460788 - 231463287 : NCL,	0	0	0	9.20653	0	13.7444	8.89073	6.15356	21.9207	0	1.82584	0.377491	0.999043	chr2	231460788	231463287	-	0	CGAA	AAGTTGTTCCTGTGAAAGCCAAGAA	TACCTCCTTTGGAGGAGGAGCCATT	NCL,
chr11 : 68571104 - 68537659 : PPP6R3,	0	0	0	0	4.7083	0	0	0	0	3.7624	2.7661	0.380013	0.999043	chr11	68571104	68537659	+	6	GTAG	CCTGGGAAATGAATGAGAAGAAACA	GATCAAATTTCCAAAACATGCTGGT	PPP6R3,
chr18 : 76851939 - 76849526 : ZNF236,	4.06864	5.66588	4.53172	0	0	0	0	0	0	5.26736	-1.97875	0.380055	0.999043	chr18	76851939	76849526	+	6	GTAG	TATTATGCTACATGAAAAGGAAGAG	TCCGCATTCAATGTTAAAACTCCAT	ZNF236,
chr14 : 71036157 - 71026117 : PCNX1,	0	0	0	0	0	4.12332	0	0	4.38414	0	2.76039	0.381017	0.999043	chr14	71036157	71026117	+	6	GTAG	AAGCACAGTCTTCACAGTATTGCAG	TGTAGGCAATGATACGATTATGACC	PCNX1,
chrX : 41186642 - 41183998 : USP9X,	0	0	0	0	3.13886	0	0	5.27448	0	0	2.7493	0.382974	0.999043	chrX	41186642	41183998	+	6	GTAG	TCTTGCTCAGCAGATATCTGATGAG	CTTAATTTTTCTATCGTTGTGCTAT	USP9X,
chr2 : 135135932 - 135129995 : RAB3GAP1,	0	0	0	0	3.92358	0	0	4.3954	0	0	2.73398	0.385687	0.999043	chr2	135135932	135129995	+	6	GTAG	ACCTCTCTACATTCCAGTAACCCAG	TTAAAAAATTCAGTGACAAAATCAC	RAB3GAP1,
chr17 : 27309272 - 27303367 : WSB1,	0	0	0	0	5.49301	2.74888	0	0	0	0	2.72867	0.386629	0.999043	chr17	27309272	27303367	+	6	GTAG	ATGGAGACATTCTGATGGAATTTGG	AACATTCTTGGTGCCATGCAAGAGA	WSB1,
chr2 : 24147086 - 24135119 : FAM228B,RP11-507M3.1,FAM228B,	0	0	0	0	0	0	0	5.27448	0	3.00992	2.72814	0.386723	0.999043	chr2	24147086	24135119	+	6	GTAG	AAAGTGAATTTTGTAGAAGGAGAAG	CCTCAGTATCTTCTTTAGCTAAAAC	FAM228B,RP11-507M3.1,FAM228B,
chr9 : 37127263 - 37126312 : ZCCHC7,	8.13729	4.24941	14.7281	6.13768	3.13886	8.24663	7.77939	3.51632	5.48018	4.51488	-0.616458	0.389421	0.999043	chr9	37127263	37126312	+	6	GTAG	CCTCTCTCTCTGCTTGGTACCACAG	TCATAAAAAGTCAGTAACCTTGAAG	ZCCHC7,
chr17 : 36953907 - 36952886 : AATF,	14.9184	21.247	26.0574	16.8786	15.6943	18.5549	16.6701	16.7025	3.28811	21.0694	-0.345116	0.38965	0.999043	chr17	36953907	36952886	+	6	GTAG	GAATTTTCCAGTGCCCTGAAAAATA	CCTTCCTCATCAGATATTTCCTCAT	AATF,
chr11 : 62567484 - 62572619 : RP11-864I4.1,EEF1G,	0	0	0	0	0	0	0	4.3954	0	3.7624	2.70723	0.390451	0.999043	chr11	62567484	62572619	-	0	TGGC	CCAGGCCTTTCCCAATACCAACCGC	GAAATTTGCGGAGAAATTCAGGGGT	RP11-864I4.1,EEF1G,
chr12 : 54236565 - 54236905 : CBX5,	0	0	0	0	0	2.74888	0	0	5.48018	0	2.70623	0.390629	0.999043	chr12	54236565	54236905	-	5	GTAG	GCCTGTGGCAAGGCAGAGAGGAAAG	ATCTCAATAAGAAAATCCCAAAAAC	CBX5,
chr19 : 30012531 - 29985223 : URI1,	0	0	0	0	0	0	4.44537	0	0	3.7624	2.70369	0.391082	0.999043	chr19	30012531	29985223	+	6	GTAG	TTTGCCCTTATCAGTAACACCTGAG	ATTATAGTCATTATCTACCTTCTTC	URI1,
chr20 : 49094963 - 49090742 : CSE1L,	0	0	6.79759	9.20653	4.7083	2.06166	0	0	0	0	-1.81453	0.392931	0.999043	chr20	49094963	49090742	+	6	GTAG	GTTGTCTACCGCCTGTCCAGGAAGG	TCTGAAAGACACCTAGTAACCCAGG	CSE1L,
chr12 : 28307749 - 28305649 : CCDC91,	0	4.24941	0	6.90489	5.49301	8.93385	4.44537	0	7.67225	8.27728	1.01409	0.393038	0.999043	chr12	28307749	28305649	+	6	GTAG	TCAAGATAGATACAAAGAACTTCAG	GATGGTGAAAGATGGACTCCAGATA	CCDC91,
chr16 : 75391380 - 75414695 : CFDP1,	0	0	6.79759	0	0	0	0	5.27448	10.9604	37.624	2.39919	0.393461	0.999043	chr16	75391380	75414695	-	5	GTAG	TCAGCAGGTGATTAAGAGTTGCCAG	ACATCATCTTCACTATACTCTCCAC	CFDP1,
chr14 : 91783136 - 91813825 : TC2N,TC2N,	0	0	0	0	0	0	0	3.51632	0	4.51488	2.68604	0.394249	0.999043	chr14	91783136	91813825	-	5	GTAG	AGAGACAGTAATAAATCCAGAAAAG	ACAAACTTCCAATCTTAATATTAAT	TC2N,TC2N,
chr5 : 36986301 - 36984676 : NIPBL,	0	8.49881	0	6.90489	5.49301	2.06166	11.1134	8.7908	6.57621	7.5248	0.820138	0.394365	0.999043	chr5	36986301	36984676	+	6	GTAG	AATAAACCATCAAAGTCAAATAAAG	TGTTTTCTTTTTTTCAAAGGCTTAT	NIPBL,
chrX : 85074391 - 85067127 : APOOL,	0	0	6.79759	6.13768	2.35415	15.806	0	12.3071	4.38414	4.51488	0.977596	0.394469	0.999043	chrX	85074391	85067127	+	6	GTAG	AAGACCAAATCAGAATCCACTTCAG	TAAGTAATTTTCTTAAACTTGGAAC	APOOL,
chr20 : 44503815 - 44506996 : SERINC3,	23.0557	5.66588	0	4.60326	8.63188	0	0	6.15356	8.76828	2.25744	-0.944863	0.396508	0.999043	chr20	44503815	44506996	-	5	GTAG	TTGTTCTCTGCCTCTTGTATTCTAG	AAGGCGCTTGTGAAAGACAGTAAAG	SERINC3,
chr1 : 171587751 - 171579354 : PRRC2C,	4.06864	0	5.66465	6.90489	3.13886	4.81054	6.66805	9.66988	14.2485	4.51488	0.720619	0.397774	0.999043	chr1	171587751	171579354	+	6	GTAG	CCACACCAACATCTAGTCCCTTCCG	TCCATATAGAAGGCTGGGATTTGAG	PRRC2C,
chr17 : 50743790 - 50745866 : LUC7L3,	0	0	0	0	0	3.4361	4.44537	0	0	0	2.64713	0.401282	0.999043	chr17	50743790	50745866	-	0	TTTT	TCACCGACGTTGTGGACCTTAGCAG	ACGAAGGGAAGAGGAAGAAAGAGAA	LUC7L3,
chr1 : 233177802 - 233218184 : PCNX2,	0	0	0	0	0	0	0	3.51632	4.38414	0	2.64284	0.402062	0.999043	chr1	233177802	233218184	-	5	GTAG	CCCCAAGAAGATGAAAGATTCAGTG	TACATTCTCCTTGATGTCTTCAGTT	PCNX2,
chr4 : 143543972 - 143543509 : SMARCA5,	21.6994	9.91528	4.53172	6.13768	7.06245	9.62107	4.44537	0	0	16.5546	-0.708546	0.40273	0.999043	chr4	143543972	143543509	+	6	GTAG	AGAAGACTATAGAGAAAAACAAAAG	TTCAGATTCTGATCCACAAGCCTCC	SMARCA5,
chr17 : 19958014 - 19958571 : AKAP10,	0	4.24941	0	2.30163	3.92358	0	0	21.0979	0	2.25744	1.4792	0.40389	0.999043	chr17	19958014	19958571	-	5	GTAG	GAATTGTCAGGAAAACTAATGAAAA	GTCTGGTAGTCCAGACAAGATCTGC	AKAP10,
chr16 : 13934192 - 13935743 : ERCC4,	0	0	0	3.06884	12.5555	0	0	0	15.3445	0	2.53407	0.410786	0.999043	chr16	13934192	13935743	-	3	CTGC	TCTAGGACCAGTTCCTTTTTTGTTT	CGAGTAGGCCTGGGAAACCTCTGAG	ERCC4,
chr14 : 73103353 - 73105942 : RBM25,	0	0	0	0	3.13886	0	0	4.3954	0	0	2.59093	0.411571	0.999043	chr14	73103353	73105942	-	0	CGCT	ACGGTCCCTATCCCGTTCTCGTTCC	GAGAGCGAGAACGAGAACGGGAGCG	RBM25,
chr12 : 69801721 - 69800209 : RAB3IP,AC025263.3,	4.06864	24.08	4.53172	8.43932	4.7083	0	7.77939	7.03264	5.48018	14.2971	-0.63873	0.412157	0.999043	chr12	69801721	69800209	+	6	GTAG	CTGCAGTTGAATGCGGAGGACCAAA	ATTCATTATACAAGGATAAGTCAGC	RAB3IP,AC025263.3,
chr16 : 75411825 - 75414695 : CFDP1,	0	0	0	0	4.7083	2.74888	0	0	0	0	2.58594	0.412492	0.999043	chr16	75411825	75414695	-	5	GTAG	TTGATTTTGCTGGTGAAGAAGTAAG	ACATCATCTTCACTATACTCTCCAC	CFDP1,
chr3 : 18527326 - 18463480 : SATB1-AS1,	0	0	0	0	4.7083	2.74888	0	0	0	0	2.58594	0.412492	0.999043	chr3	18527326	18463480	+	6	GTAG	ACATTAAATAAGCTTTGAATTAACT	CATTTTGCCTGGTCACCTAGGGGCT	SATB1-AS1,
chr6 : 89871388 - 89862126 : CASP8AP2,	0	0	0	0	4.7083	2.74888	0	0	0	0	2.58594	0.412492	0.999043	chr6	89871388	89862126	+	6	GTAG	CAAGTTGGATAAAAATCCAAATCAG	TCGAAAATGTGGAAACTCAGACAAT	CASP8AP2,
chr15 : 58484216 - 58485480 : ALDH1A2,	0	0	0	0	3.13886	0	0	0	4.38414	0	2.57535	0.414451	0.999043	chr15	58484216	58485480	-	4	GCAG	GAGGTGAAAATAAACAATGTATGAT	TGCAATGTTCATCACTCCCCTGGCT	ALDH1A2,
chr2 : 231460752 - 231461697 : NCL,	0	0	0	0	3.13886	0	0	0	4.38414	0	2.57535	0.414451	0.999043	chr2	231460752	231461697	-	0	GGGA	ATGAAGATGAAGAAGAGGATGATGA	GTCATCCTCCTCATCCTCCTCACTG	NCL,
chr3 : 170128684 - 170145521 : PHC3,	0	0	0	1.53442	0	5.49776	0	1.75816	5.48018	0	2.09308	0.415023	0.999043	chr3	170128684	170145521	-	5	GTAG	ACCAGCACCTGTTGATCCACCAGTG	CAGTGGTAGCGGGTGTGAAAATCAG	PHC3,
chr1 : 224190319 - 224189577 : DEGS1,	0	0	0	0	0	0	0	4.3954	0	3.00992	2.56743	0.415919	0.999043	chr1	224190319	224189577	+	6	GTAG	CATTCCTGGAAAAAGTCTTCCACTG	AAGGACTTTATCTCTGGATACTTTG	DEGS1,
chr3 : 56567053 - 56563684 : CCDC66,	0	0	0	0	0	0	0	0	4.38414	3.00992	2.5514	0.418901	0.999043	chr3	56567053	56563684	+	6	GTAG	AAAGCCCAGTGGAGGAAAGAGCTAG	TTGCAATCTTGGCCTTATTTCCCAT	CCDC66,
chr5 : 134661586 - 134661119 : SEC24A,	0	0	0	0	0	0	0	0	4.38414	3.00992	2.5514	0.418901	0.999043	chr5	134661586	134661119	+	6	GTAG	CTTCAAAATAGCTTCATAAAGTCAG	GACAGCAATGCATTTTGGACAGGAC	SEC24A,
chr20 : 2965202 - 2923207 : PTPRA,	2.71243	0	0	2.30163	0	0	8.89073	0	9.86432	3.7624	1.54389	0.419705	0.999043	chr20	2965202	2923207	+	6	GTAG	ACTCCAGAAACTTTCCCTCCTTCAG	CTTTGTTTTTTTTTAGTTGTGTCAC	PTPRA,
chr5 : 132927121 - 132934941 : AFF4,	0	0	3.39879	0	5.49301	0	0	7.03264	5.48018	0	1.81134	0.42345	0.999043	chr5	132927121	132934941	-	5	GTAG	TTCCAAATTTCCTTTTCCAACTAAG	TTGATAACTTATCTTCTTTGCTAGT	AFF4,
chr17 : 78031842 - 78004170 : TNRC6C,	0	0	0	0	0	4.12332	0	0	0	3.00992	2.52627	0.4236	0.999043	chr17	78031842	78004170	+	6	GTAG	CATCATCCCAGTAAGCTCCAACCAG	TTCTTGTGTTTCTTGCTCTTTCTCC	TNRC6C,
chr1 : 53800693 - 53832591 : NDC1,	0	0	0	0	0	2.74888	0	0	4.38414	0	2.50139	0.428281	0.999043	chr1	53800693	53832591	-	5	GTAG	GAACCTAAGAAATTAAATTCTCCAG	GAACTATACAGGTCACTGAAAGAAT	NDC1,
chr19 : 41869072 - 41871393 : RPS19,	0	0	0	0	0	2.74888	0	0	4.38414	0	2.50139	0.428281	0.999043	chr19	41869072	41871393	-	0	CCAA	CATAGATCTTGGTCATGGAGCCAAC	AAGCATTAGAACAAACCATGCTGGG	RPS19,
chr2 : 135772547 - 135748267 : UBXN4,	0	16.9976	18.1269	4.60326	5.49301	10.3083	3.33402	8.7908	0	9.02976	-0.657932	0.432125	0.999043	chr2	135772547	135748267	+	6	GTAG	GGGAATCTTATGCAAGAGAAAGAAG	ATCTGTGTAGACTGTTCATCATCAC	UBXN4,
chr6 : 145864388 - 145894977 : SHPRH,	0	0	0	0	3.92358	0	0	0	0	3.00992	2.47936	0.432452	0.999043	chr6	145864388	145894977	-	5	GTAG	CTACAGTTGAGAGATTTGGTGATTT	CTTCCACTTTTGTAGAATGGCTGCC	SHPRH,
chr3 : 33409236 - 33425741 : UBP1,	0	0	0	0	3.13886	0	0	0	0	3.7624	2.4731	0.43364	0.999043	chr3	33409236	33425741	-	5	GTAG	CTATGATACCACAATCCTCACAGAG	GAAAATGGGCAATGCCAAGACATCA	UBP1,
chr4 : 177360677 - 177353308 : NEIL3,	10.8497	0	3.39879	6.13768	3.92358	2.74888	11.1134	20.2188	3.28811	7.5248	0.660249	0.434748	0.999043	chr4	177360677	177353308	+	6	GTAG	AGAAGCACAATGTGGATTTTTTGAA	TTTTCTTCACTCTTGAGCACTGAAT	NEIL3,
chr5 : 79623489 - 79619612 : PAPD4,	4.06864	9.91528	3.39879	6.13768	11.7707	0	0	0	4.38414	0	-1.1209	0.436626	0.999043	chr5	79623489	79619612	+	6	GTAG	CACACTGCCTGAGGCCAAAGATAAG	TGGAAGTGAACATGTATTCTTCTAC	PAPD4,
chr3 : 105693494 - 105704173 : CBLB,	0	0	2.26586	0	4.7083	2.74888	0	6.15356	0	0	1.92537	0.437368	0.999043	chr3	105693494	105704173	-	5	GTAG	TTACCACCCTCCTCCCTAGCATAAA	CTGGTGAGTTCTGCCTGTCAGTGCA	CBLB,
chr8 : 100709133 - 100713181 : PABPC1,	0	0	3.39879	0	0	2.74888	0	4.3954	6.57621	2.25744	1.6378	0.442214	0.999043	chr8	100709133	100713181	-	5	GTAG	ACTGCTCAGGGTGCCAGACCTCATC	ATTACTTTCACACTTAAGGCAGGCC	PABPC1,
chr1 : 58506060 - 58539310 : OMA1,DAB1,OMA1,	8.13729	0	5.66465	0	10.2013	0	14.4474	3.51632	0	12.0397	0.978083	0.443182	0.999043	chr1	58506060	58539310	-	5	GTAG	GTACTTGGATAGACTTATACCTCAG	GAAGCTCATTTTTTCACTTGACTAC	OMA1,DAB1,OMA1,
chr16 : 69167185 - 69160356 : UTP4,	5.42486	0	0	4.60326	0	3.4361	0	0	0	0	-2.08408	0.444976	0.999043	chr16	69167185	69160356	+	6	GTAG	TTTTAAAATTTCTAAGATATATAAG	AAAAGACACATGGCCTCCACTGTTC	UTP4,
chr6 : 119002899 - 119024813 : FAM184A,	0	0	0	0	3.13886	0	0	3.51632	0	0	2.41311	0.445131	0.999043	chr6	119002899	119024813	-	5	GTAG	GAAAGTAGAAGATCTCTTAAACCAG	TTTTAGTGTTTAAAGCATATATTAC	FAM184A,
chr9 : 5968019 - 5969436 : KIAA2026,	0	0	3.39879	0	6.27773	2.06166	4.44537	0	0	3.00992	1.62818	0.445468	0.999043	chr9	5968019	5969436	-	5	GTAG	GCAAAACACAAGAAGCACAAATCTG	TTCTTTTCTTTCCTGCTCCCGAAGC	KIAA2026,
chr3 : 197875775 - 197865423 : LRCH3,	8.13729	0	10.1964	10.7409	15.6943	6.18498	0	15.8234	15.3445	12.0397	0.548661	0.445501	0.999043	chr3	197875775	197865423	+	6	GTAG	TTGCAGAAAAATTGGTGTACCTCAG	ATAGAGCATTAGGTCTGTCATCACT	LRCH3,
chr1 : 171536278 - 171532343 : PRRC2C,	0	0	0	0	3.13886	3.4361	0	0	0	0	2.40788	0.446142	0.999043	chr1	171536278	171532343	+	6	GTAG	ATGGATATTCCACCCATTCATCCTG	CTGCCTGTCGATCTGGAGGTGGATG	PRRC2C,
chr18 : 21779685 - 21765772 : MIB1,	0	0	0	2.30163	5.49301	0	0	0	3.28811	5.26736	1.86932	0.446842	0.999043	chr18	21779685	21765772	+	6	GTAG	TAGTACAGTATCCAAGTGGCAATAG	CACATGGTTCCATCATGCTTGATGC	MIB1,
chr14 : 39179462 - 39179091 : PNN,	10.8497	8.49881	0	6.13768	7.06245	3.4361	0	6.15356	31.785	20.317	0.853269	0.449481	0.999043	chr14	39179462	39179091	+	6	GTAG	GAAGAGTCACAGAGAAAAATGAACG	GTTCAATTTCCTGGCGCCGCTTTTG	PNN,
chr1 : 243613671 - 243695716 : AKT3,	9.4935	0	6.79759	0	7.06245	0	0	0	0	0	-1.76725	0.450139	0.999043	chr1	243613671	243695716	-	5	GTAG	GATGGAATATGTTAATGGGGGCGAG	GGCCTCCAGTTTTTTATATATTCTC	AKT3,
chr19 : 33114419 - 33113767 : GPATCH1,	0	0	4.53172	10.7409	0	9.62107	0	13.1862	31.785	3.7624	1.3155	0.450225	0.999043	chr19	33114419	33113767	+	6	GTAG	TGCACCAGAATTATCCGCAAATCAG	TCTTGGTAAGCCAACTAAAGTTGAA	GPATCH1,
chr12 : 75282251 - 75326527 : CAPS2,	0	0	0	0	0	3.4361	0	0	0	3.00992	2.38159	0.451237	0.999043	chr12	75282251	75326527	-	5	GTAG	AAGAAGCATTCTCAAGTAATTTCAG	GTTCCTGTGTTTATCATGCAGTATA	CAPS2,
chr18 : 9221999 - 9182027 : ANKRD12,	0	0	0	0	0	3.4361	0	0	0	3.00992	2.38159	0.451237	0.999043	chr18	9221999	9182027	+	6	GTAG	TCTGATGATGATGAAAGTTACACAG	TTTTGTGTTGGTTTGGAAGTCATTT	ANKRD12,
chr17 : 48133535 - 48137337 : SKAP1,	4.06864	7.08235	7.93052	0	0	1.37444	0	0	3.28811	7.5248	-1.20862	0.454894	0.999043	chr17	48133535	48137337	-	5	GTAG	TTTCCACAAGCTTTTCACAAAGAAG	CCCACCAGCCATACATGTTATACTC	SKAP1,
chr3 : 8935871 - 8941804 : RAD18,	0	2.83294	3.39879	0	0	0	6.66805	4.3954	13.1524	0	1.37837	0.456137	0.999043	chr3	8935871	8941804	-	5	GTAG	TGCGATGCTTTGCATCCTAAATCAG	TAAAGCAAACTGCAGCAGATGATTC	RAD18,
chr16 : 68191775 - 68190768 : NFATC3,	12.2059	0	6.79759	9.97374	6.27773	1.37444	5.55671	5.27448	5.48018	4.51488	-0.636749	0.460329	0.999043	chr16	68191775	68190768	+	6	GTAG	CTGCAGGACATCACTTTAGATGATG	TCTCTGTGTTCTTGCTTCATCAAAA	NFATC3,
chr13 : 99244624 - 99238427 : UBAC2,	0	0	0	0	0	2.74888	0	3.51632	0	0	2.33142	0.46105	0.999043	chr13	99244624	99238427	+	6	GTAG	CAGCTAGTAATTTGCCTTCTGGATT	AGGCTCTTCGACAGAGGCGCCTTGT	UBAC2,
chr12 : 111679151 - 111683307 : BRAP,	4.06864	0	5.66465	0	0	3.4361	0	0	0	0	-2.03183	0.461392	0.999043	chr12	111679151	111683307	-	5	GTAG	GGTGCTGATAAAGTTTCGTGCACAG	ATCTCCTCATCAGACATTTCCCCGG	BRAP,
chr15 : 68146700 - 68141946 : PIAS1,	6.78107	9.91528	6.79759	0	4.7083	0	4.44537	7.91172	0	0	-1.03596	0.463942	0.999043	chr15	68146700	68141946	+	6	GTAG	TTCTTGGACTGCAGAAATTGGAAGA	CGAAAGCGCTGACTGTTGTCTGATG	PIAS1,
chr1 : 28480604 - 28473554 : PHACTR4,	0	0	3.39879	0	0	0	0	7.03264	6.57621	3.00992	1.69332	0.464195	0.999043	chr1	28480604	28473554	+	6	GTAG	ACCAGATTGGAAACACACTGATCCG	CTGTTTATTGCTTGGGACAGTTCAG	PHACTR4,
chr6 : 13632370 - 13644729 : RANBP9,	20.3432	19.8306	13.5952	10.7409	28.2498	23.3655	8.89073	23.7352	18.6326	12.0397	0.290674	0.464696	0.999043	chr6	13632370	13644729	-	5	GTAG	CACTGCAAACAAAAAAATGTTGAAG	GCCCCACAGTAGGATACAAATTTGG	RANBP9,
chr5 : 71511151 - 71509465 : BDP1,	0	0	13.5952	3.83605	6.27773	0	0	0	0	3.00992	-1.48114	0.465037	0.999043	chr5	71511151	71509465	+	6	GTAG	TGCTGTGCCTTCACTAGATATTCAG	ATTTGCCTTATTATTCTCTTGAACG	BDP1,
chr18 : 37084232 - 37066890 : KIAA1328,	4.06864	0	0	3.06884	0	4.81054	11.1134	4.3954	4.38414	0	1.17604	0.465673	0.999043	chr18	37084232	37066890	+	6	GTAG	TGAATGGCAGTGACTCTGGACCAAG	GGAGAGTGCTTTTTCTACTGGATAC	KIAA1328,
chr19 : 15271322 - 15273133 : BRD4,	0	0	0	0	3.13886	0	0	0	0	3.00992	2.30779	0.465712	0.999043	chr19	15271322	15273133	-	5	GTAG	AGATTGCGACGGTGTGAATGAGAAG	CCCATCACATTCTTCACCAGGCACT	BRD4,
chr6 : 99400856 - 99401449 : PNISR,	0	0	0	2.30163	0	0	7.77939	7.03264	0	0	1.94297	0.467137	0.999043	chr6	99400856	99401449	-	0	TTGA	AGAAACAAAAAAGGGAAGAAAAAGA	TCCCGACCTACTCCTTCCTTGTTTT	PNISR,
chr21 : 31700995 - 31706357 : SCAF4,	0	0	3.39879	4.60326	5.49301	0	0	7.03264	9.86432	4.51488	1.09907	0.467513	0.999043	chr21	31700995	31706357	-	5	GTAG	TGAACAGAAAACTGCATTTGACAAG	GTTTCATATCCATAAGCGAAAAGAG	SCAF4,
chr6 : 116689320 - 116692392 : KPNA5,	6.78107	0	14.7281	13.0426	11.7707	0	7.77939	6.15356	0	6.01984	-0.725197	0.468608	0.999043	chr6	116689320	116692392	-	3	CTGC	TCTTTCCCTGGACTAGCCATGGCAT	AAATTTAGAAAGCTGCTTTCTAAAG	KPNA5,
chr9 : 83678441 - 83683066 : UBQLN1,	0	0	0	3.06884	0	0	3.33402	0	9.86432	3.00992	1.69796	0.469815	0.999043	chr9	83678441	83683066	-	5	GTAG	AATGCTGAGTGCTGCACAAGAGCAG	TTGCTGAGCTGAATGATCCTGAGGC	UBQLN1,
chr4 : 147634581 - 147633765 : TMEM184C,	0	0	0	2.30163	0	6.18498	3.33402	0	0	3.7624	1.79335	0.470518	0.999043	chr4	147634581	147633765	+	6	GTAG	AGGTACAACTACTGCATTTATATAT	ACATCTCAATACAGATAATAAAATC	TMEM184C,
chr13 : 32517857 - 32527532 : N4BP2L2,	8.13729	0	4.53172	5.37047	0	0	0	0	4.38414	6.77232	-1.28255	0.47192	0.999043	chr13	32517857	32527532	-	5	GTAG	CTCCTCCTCCACAGGGGAGACAGAG	ATCACGATTCTGACCAAGCAGAATT	N4BP2L2,
chr13 : 19633905 - 19646554 : MPHOSPH8,	0	14.1647	0	0	0	0	5.55671	0	0	0	-1.96288	0.473222	0.999043	chr13	19633905	19646554	-	0	CTTT	CCTCGAACACATCCTCTCCGTCCTC	AAAAAGAAAAAATTGAGGCAGAGAG	MPHOSPH8,
chr7 : 158759486 - 158764853 : ESYT2,	4.06864	0	5.66465	0	5.49301	4.12332	2.22268	5.27448	3.28811	6.01984	0.885817	0.473233	0.999043	chr7	158759486	158764853	-	5	GTAG	CTTGGATTCAGCAAGGAACCTTCCG	CAATAAAATGTATCCTTAGAACACC	ESYT2,
chr14 : 102209862 - 102194938 : WDR20,	0	0	3.39879	0	0	0	4.44537	4.3954	3.28811	3.00992	1.55375	0.473382	0.999043	chr14	102209862	102194938	+	6	GTAG	CACATGGGGAAGGCCTGGTAAAGTG	CTATTGGTTTACTCAAGTCAGCAGC	WDR20,
chr2 : 231460787 - 231461726 : NCL,	0	5.66588	0	3.06884	3.13886	0	0	0	0	0	-2.02341	0.473914	0.999043	chr2	231460787	231461726	-	5	GTAG	AGTTGTTCCTGTGAAAGCCAAGAAC	CATCCTCCTCTTCATCACTGTCTTC	NCL,
chr7 : 24680520 - 24623666 : MPP6,	5.42486	4.24941	0	3.06884	0	0	0	6.15356	0	0	-1.62962	0.475999	0.999043	chr7	24680520	24623666	+	6	GTAG	AGGAATCACTACCAAGCTTCTGACC	AGGTTTTCCAAGACTTGCTGCATTG	MPP6,
chr3 : 170149086 - 170178938 : PHC3,	0	0	0	0	3.13886	2.74888	0	0	0	0	2.24979	0.477265	0.999043	chr3	170149086	170178938	-	5	GTAG	TCAAATGTATCTCCGAGCTCAAATG	CATAGCTGTACTATGGTCCTTAAAT	PHC3,
chr1 : 41070595 - 41075451 : SCMH1,	14.9184	12.7482	15.861	11.5082	10.2013	8.24663	6.66805	13.1862	19.7286	8.27728	-0.324258	0.478438	0.999043	chr1	41070595	41075451	-	5	GTAG	AGCTCAGCCATGCAGGCCCCAACAG	GGATAGGGATTCTTTGGAATCACAA	SCMH1,
chr11 : 34978182 - 34957384 : PDHX,	12.2059	15.5812	5.66465	8.43932	6.27773	6.18498	7.77939	15.8234	20.8247	23.3269	0.372637	0.47847	0.999043	chr11	34978182	34957384	+	6	GTAG	CAAGGCAGCAGCTGTTACCCTTAAA	GTATATTTTTACTTCCTTCTTCAAC	PDHX,
chr15 : 58912563 - 58916999 : SLTM,	0	0	0	4.60326	8.63188	0	7.77939	0	4.38414	0	1.49569	0.480258	0.999043	chr15	58912563	58916999	-	5	GTAG	AGATGATACCTTTCTAACAGCCCAA	AACTCATCTGCTTCATGTTTTTTAC	SLTM,
chr14 : 65455718 - 65432037 : FUT8,	10.8497	7.08235	0	7.6721	15.6943	3.4361	3.33402	3.51632	21.9207	8.27728	0.547802	0.481743	0.999043	chr14	65455718	65432037	+	6	GTAG	TTGTTGATTAACTGGACAAATTCAG	CCCCATTTGGCAATTCAGAAGGTCA	FUT8,
chr15 : 65752379 - 65761438 : DENND4A,	0	4.24941	0	0	2.35415	6.87219	0	0	4.38414	3.00992	1.45864	0.482036	0.999043	chr15	65752379	65761438	-	5	GTAG	CGACAAGAATCTCAATAACAGTATG	CGCAGCCTCAGAGTTTGAGAAATAA	DENND4A,
chr12 : 45926142 - 45928859 : SCAF11,	2.71243	15.5812	6.79759	0	5.49301	4.81054	2.22268	0	3.28811	5.26736	-0.796178	0.482366	0.999043	chr12	45926142	45928859	-	5	GTAG	CAAGAGGAGGAAACATCTGGACAGG	AATGCATATCCCTTGCAAGAAGTAC	SCAF11,
chr7 : 92307656 - 92294889 : ANKIB1,	0	0	0	0	0	2.74888	0	0	0	3.00992	2.22064	0.483127	0.999043	chr7	92307656	92294889	+	6	GTAG	CTCAGGGATGAAAGCCTGTGTAGAG	ACACTTCTGCAACATCTTTCACATT	ANKIB1,
chr9 : 19300331 - 19288596 : DENND4C,	9.4935	12.7482	0	6.90489	0	11.6827	4.44537	3.51632	0	5.26736	-0.781974	0.483307	0.999043	chr9	19300331	19288596	+	6	GTAG	TGGGGTAGCTGAAGCTGTTGTAGCT	AACACAGAAACACGCTGGAACCCCA	DENND4C,
chr15 : 75411492 - 75414311 : SIN3A,	0	7.08235	4.53172	11.5082	11.7707	17.8677	5.55671	3.51632	4.38414	8.27728	0.53989	0.484167	0.999043	chr15	75411492	75414311	-	5	GTAG	CCTGGAGATTTTGCACACATATCAG	CAAGATAAGATAGCGCATCCTCCAC	SIN3A,
chr3 : 172251541 - 172247533 : FNDC3B,	21.6994	8.49881	19.2598	35.2917	33.7428	35.7354	23.3382	29.0096	14.2485	18.812	0.253873	0.487915	0.999043	chr3	172251541	172247533	+	6	GTAG	AAGTCGAATGATTCAGACTTGCAAG	GGACTCCAGTACTATCTTCAATCAC	FNDC3B,
chr17 : 46170855 - 46172232 : KANSL1,	0	0	0	2.30163	0	4.12332	3.33402	0	0	5.26736	1.73135	0.489494	0.999043	chr17	46170855	46172232	-	5	GTAG	ATCCCGAGCAGCGTCATGTACCCCT	CCTTACTGCCTCCCCAGAGAACAGA	KANSL1,
chr2 : 71370005 - 71363153 : ZNF638,	0	0	0	9.20653	3.13886	0	0	0	0	0	-2.12692	0.490046	0.999043	chr2	71370005	71363153	+	6	GTAG	TGTTCCAGGAAAGAAAAAAGCACAG	GATCTCAGGATTCCAATCAGGATAC	ZNF638,
chr3 : 18378170 - 18420991 : SATB1,	4.06864	0	9.06345	4.60326	1.56943	4.12332	0	5.27448	0	2.25744	-0.99408	0.490412	0.999043	chr3	18378170	18420991	-	5	GTAG	AAAGGTTGCAGCAACCAAAAGCCAG	TACTCAGTCACTGTCTAAAGATCAC	SATB1,
chr10 : 84373815 - 84371014 : CCSER2,	8.13729	5.66588	5.66465	0	6.27773	15.806	0	3.51632	8.76828	9.78224	0.652943	0.490812	0.999043	chr10	84373815	84371014	+	6	GTAG	TGAGTCCTCTGAAATGAACAGCATA	ATTTGTTCTTAAAAGTTGAAAGAAT	CCSER2,
chr8 : 668598 - 674047 : ERICH1,	14.9184	38.2447	22.6586	7.6721	16.479	8.24663	32.2289	7.91172	19.7286	15.8021	-0.309763	0.494247	0.999043	chr8	668598	674047	-	5	GTAG	CCAGAACATTGCACGATGCCTCCTG	TTTGGCTGGTCATGAGGATCCTGAT	ERICH1,
chr10 : 104018908 - 104008177 : SLK,	0	8.49881	5.66465	3.06884	0	9.62107	0	0	0	0	-1.38783	0.494918	0.999043	chr10	104018908	104008177	+	6	GTAG	TCAGCTACTTAAGCGCCACGAGAAG	CCTGGTCATATTGTCGCTTTTTACT	SLK,
chr7 : 158906091 - 158879684 : WDR60,	0	0	4.53172	3.83605	3.92358	0	0	3.51632	10.9604	8.27728	1.0359	0.495744	0.999043	chr7	158906091	158879684	+	6	GTAG	GTCGGACTCAGGCCCTTAAGCAAAA	TGTCCTTGCTGTCTCCGTACTGCAG	WDR60,
chr10 : 16486617 - 16484337 : PTER,	5.42486	0	5.66465	0	4.7083	0	0	0	0	0	-1.79488	0.496375	0.999043	chr10	16486617	16484337	+	6	GTAG	AAACAGTCATGTCACACCTGGATAG	GTTCTAAAAAGAGGATTTCTTTTTT	PTER,
chr17 : 35478075 - 35480195 : SLFN12L,	0	7.08235	0	3.83605	3.13886	0	0	0	2.19207	0	-1.62435	0.496615	0.999043	chr17	35478075	35480195	-	5	GTAG	CAGCCACTGAGATATCACCTTCCAG	GCCATTTCCACGCAGAAATTCTTTT	SLFN12L,
chr7 : 33388144 - 33357855 : BBS9,	13.5621	0	11.3293	3.06884	5.49301	4.81054	3.33402	0	0	10.5347	-0.769522	0.498296	0.999043	chr7	33388144	33357855	+	6	GTAG	CTTGTTAGATGGAACCTACAAGCAG	TTACATTGGATAACTCGCGGAATGC	BBS9,
chr7 : 40002031 - 39987599 : CDK13,	4.06864	0	0	0	4.7083	0	3.33402	0	3.28811	4.51488	1.42644	0.499621	0.999043	chr7	40002031	39987599	+	6	GTAG	GCTTTGGATTTCAAGAAGGACAAAG	TCTGCTTCGGGATTTTCCAGACCGT	CDK13,
chr19 : 8463686 - 8455405 : HNRNPM,	0	4.24941	0	0	5.49301	0	6.66805	0	0	5.26736	1.50824	0.501345	0.999043	chr19	8463686	8455405	+	6	GTAG	CGGAAGACCACTGAAAGTCAAAGAA	ATTCTGAGCAGGTCGTTCTCCTTCA	HNRNPM,
chr17 : 61984171 - 61985090 : MED13,	10.8497	5.66588	7.93052	3.06884	5.49301	7.55941	0	0	8.76828	3.7624	-0.668211	0.502946	0.999043	chr17	61984171	61985090	-	5	GTAG	CTTCAATGCCATTCATCAAAGAGGG	CATTTGCTGATTTTTTAGATCCAGG	MED13,
chr11 : 108229323 - 108227595 : ATM,	0	7.08235	5.66465	4.60326	19.6179	21.991	0	3.51632	4.38414	0	0.934029	0.507743	0.999043	chr11	108229323	108227595	+	6	GTAG	TACTTCATCAAATGTGCAAACAGAA	ACAATTTCAGAACACACATCACTGT	ATM,
chr16 : 53157541 - 53141179 : CHD9,	4.06864	0	13.5952	2.30163	12.5555	4.12332	3.33402	7.91172	14.2485	3.00992	0.579558	0.507762	0.999043	chr16	53157541	53141179	+	6	GTAG	AAATCACCTATGTTTACAGCGACAG	TAACAGTACTGGTCTCAAAAAATGA	CHD9,
chr2 : 32116212 - 32098796 : SPAST,	9.4935	0	0	3.06884	0	2.74888	0	0	0	3.7624	-1.49629	0.509515	0.999043	chr2	32116212	32098796	+	6	GTAG	TATTCTTCCTTCTCTGAGGCCTGAG	AATGGCAAAACTGGTTGCATCTTCT	SPAST,
chr11 : 33287511 - 33286413 : HIPK3,	13.5621	5.66588	3.39879	3.06884	0	4.12332	8.89073	5.27448	0	5.26736	-0.697342	0.511101	0.999043	chr11	33287511	33286413	+	6	GTAG	CATATCTACAATCTCGGTACTACAG	TAGACCAAGACTTGTGAGGCCATAC	HIPK3,
chr10 : 101792839 - 101810314 : MGEA5,	0	5.66588	3.39879	0	10.2013	0	0	0	12.0564	6.01984	1.08286	0.511771	0.999043	chr10	101792839	101810314	-	5	GTAG	CAGACCTTATTTTCCTAAGGATGAG	GCAGAGATGAGAGTCATAAGTTGCT	MGEA5,
chr17 : 74203697 - 74209256 : RPL38,	13.5621	9.91528	0	0	16.479	10.9955	34.4516	17.5816	0	0	1.18711	0.51615	0.999043	chr17	74203697	74209256	-	0	GGCC	GAGACACTCACAGCAAGCAGCAACC	GATGCAGCAGATACCTTTACACCCT	RPL38,
chr12 : 46229153 - 46243314 : SLC38A1,	27.1243	18.4141	27.1903	13.8098	22.7568	11.6827	13.3361	14.0653	26.3049	21.0694	-0.236602	0.516232	0.999043	chr12	46229153	46243314	-	5	GTAG	CAAACACTGGAATCCTACTTTTTCT	CACACAGTAGACACTCAATAAATAT	SLC38A1,
chr15 : 41699159 - 41696075 : MGA,	4.06864	0	4.53172	4.60326	0	0	4.44537	0	0	3.7624	-1.29346	0.516993	0.999043	chr15	41699159	41696075	+	6	GTAG	GTGATACATCCTGGTCTTCAAGAAG	ATCTTCAAAACTGCTGGCAATAAGA	MGA,
chr13 : 46003139 - 46020557 : ZC3H13,	0	0	0	3.83605	0	0	0	6.15356	5.48018	5.26736	1.46044	0.517963	0.999043	chr13	46003139	46020557	-	5	GTAG	AAAGAGAAAAGAGAGACAAGCCAAG	TATGTCTCCCTCTTGAAGATTCTTT	ZC3H13,
chr11 : 128459726 - 128460673 : ETS1,	0	0	0	3.06884	3.92358	2.74888	7.77939	0	0	0	1.54411	0.518743	0.999043	chr11	128459726	128460673	-	0	ATGA	TGTATTAGTTAAGACAGCTTTGTCG	TTCCTCTAAAACTCCATTTTCAGAT	ETS1,
chr3 : 169988359 - 169976946 : SEC62,	39.3302	16.9976	16.994	42.1966	22.7568	35.0482	13.3361	34.2841	21.9207	21.8219	-0.22243	0.520755	0.999043	chr3	169988359	169976946	+	6	GTAG	GCCAGTATTCTTCTCCTTGCTGTTG	AAAAGACAGTCCACTGCTTTTGAAG	SEC62,
chr14 : 92014215 - 92033253 : TRIP11,	12.2059	0	0	0	0	3.4361	0	0	0	2.25744	-1.64061	0.521746	0.999043	chr14	92014215	92033253	-	5	GTAG	TTCAGACTACAACAAGCACTGTCTG	TTTGTCCTAGAATCAGGTAATTCTG	TRIP11,
chr5 : 160051183 - 160010500 : TTC1,	0	4.24941	0	0	0	5.49776	6.66805	4.3954	0	0	1.43225	0.528731	0.999043	chr5	160051183	160010500	+	6	GTAG	GAAAGACTAAAAGAAGAGATGTTAG	CCCAGTGAGGGAGGTGACGCTAAAG	TTC1,
chr20 : 35714185 - 35725155 : RBM39,	0	0	0	4.60326	0	2.74888	4.44537	6.15356	4.38414	0	1.25577	0.532264	0.999043	chr20	35714185	35725155	-	5	GTAG	CAGTTAATGGCAAGACTTGCAGAGG	AGGAGTTAAATTATCAATAGGTTCT	RBM39,
chr8 : 38337305 - 38348215 : WHSC1L1,	4.06864	0	3.39879	4.60326	3.13886	13.0572	8.89073	0	3.28811	2.25744	0.733953	0.532695	0.999043	chr8	38337305	38348215	-	5	GTAG	GTTCATACTAAAATTAACACAAGAG	TAACTTTCCCTTTCTCTCATCGGGC	WHSC1L1,
chr9 : 33944365 - 33956146 : UBAP2,	8.13729	12.7482	9.06345	7.6721	6.27773	6.18498	5.55671	2.63724	10.9604	11.2872	-0.384678	0.532897	0.999043	chr9	33944365	33956146	-	5	GTAG	GCGGCGGATACCCCCAGCTTCTAAG	CAGTGAAGACCTTTGTTTCAGAAAG	UBAP2,
chr11 : 128484823 - 128490576 : ETS1,	1.35621	0	0	2.30163	0	7.55941	0	2.63724	4.38414	0	1.36625	0.534296	0.999043	chr11	128484823	128490576	-	5	GTAG	ATGTGCATGGGGAGGACCAGTCGTG	AGTGGGACATCTGCACATTCCATAT	ETS1,
chr19 : 21424644 - 21425451 : ZNF493,	0	8.49881	10.1964	0	0	7.55941	0	0	0	0	-1.86758	0.534548	0.999043	chr19	21424644	21425451	-	1	ATAC	GAGAATATACTAAAGGCTTTGCCAC	GATAAATTATACAAATGTGAAGAAT	ZNF493,
chr9 : 33953285 - 33996333 : UBAP2,	6.78107	7.08235	0	3.83605	0	6.87219	0	5.27448	0	0	-1.09892	0.534624	0.999043	chr9	33953285	33996333	-	5	GTAG	CAACTCCTGTTCTCCTCAGAGCCTG	GATTTTTCCCTGTCACTTCCATAAG	UBAP2,
chr12 : 28307749 - 28304626 : CCDC91,	4.06864	7.08235	0	0	0	0	5.55671	0	0	0	-1.61832	0.537183	0.999043	chr12	28307749	28304626	+	6	GTAG	TCAAGATAGATACAAAGAACTTCAG	CTCACAATGAAAATTGCATGTTTCC	CCDC91,
chr10 : 17705741 - 17704431 : STAM,	6.78107	0	12.4622	4.60326	0	4.81054	0	6.15356	0	9.02976	-0.822131	0.537559	0.999043	chr10	17705741	17704431	+	6	GTAG	GTCATCTGGTGTTTCTGGTTCTCAG	TCTGTAGCAACTGGTCCATTTTATC	STAM,
chr9 : 83661777 - 83669327 : UBQLN1,	8.13729	15.5812	5.66465	0	1.56943	7.55941	10.0021	0	0	7.5248	-0.697726	0.5398	0.999043	chr9	83661777	83669327	-	5	GTAG	TCCCAGCCATCATAGCAGCATTTCT	ATTCCTGGTGTGTTGAACATACTAG	UBQLN1,
chr3 : 155829688 - 155834041 : SLC33A1,	0	4.24941	0	3.06884	7.06245	2.74888	3.33402	2.63724	5.48018	0	0.940306	0.540262	0.999043	chr3	155829688	155834041	-	5	GTAG	TTGTCGAACACCTGATGCTGTTGAG	CAGCATCTGCTGCTGAAAAACCAAT	SLC33A1,
chr6 : 17674905 - 17675770 : NUP153,	0	0	7.93052	0	3.13886	0	0	0	0	0	-1.8903	0.540562	0.999043	chr6	17674905	17675770	-	5	GTAG	TAAACTACGAAATACACCTTATCAG	GAAGCAGTACTAGTTGTTGAAGGTT	NUP153,
chr1 : 28035544 - 28058094 : EYA3,	0	0	0	4.60326	12.5555	0	3.33402	2.63724	0	0	1.34506	0.541791	0.999043	chr1	28035544	28058094	-	5	GTAG	CAAACGTATGGACTACCTCCTTTTG	AGTCTCTCTCAGCAGTTTTCACAAT	EYA3,
chr7 : 158891333 - 158879684 : WDR60,	0	4.24941	0	0	0	0	4.44537	13.1862	0	0	1.51168	0.542065	0.999043	chr7	158891333	158879684	+	6	GTAG	GAGGCCGGGAGGCGAGGAAACCGTG	TGTCCTTGCTGTCTCCGTACTGCAG	WDR60,
chr2 : 71380565 - 71355719 : ZNF638,	0	0	4.53172	3.83605	2.35415	6.18498	0	7.03264	0	9.02976	0.939025	0.543331	0.999043	chr2	71380565	71355719	+	6	GTAG	GAAATTGTTACTTCAACTTCTGCTG	ATGTATTTTGATGCTGAATCCAATC	ZNF638,
chr7 : 66134374 - 66127704 : CRCP,AC068533.7,CRCP,	0	0	4.53172	4.60326	0	0	0	4.3954	0	0	-1.65629	0.545148	0.999043	chr7	66134374	66127704	+	6	GTAG	CATTGAAAAGCCACAAGTTGACCAA	GAGAAGCGCAGAATTGGCATCCTTC	CRCP,AC068533.7,CRCP,
chr5 : 168494650 - 168488602 : RARS,	2.71243	5.66588	0	2.30163	9.41659	12.37	0	2.63724	0	3.00992	0.819614	0.549133	0.999043	chr5	168494650	168488602	+	6	GTAG	ACCTGCTCTGGGAGAGAATAAAAAG	CAGTCAGAGATTTAATCTCTTCTTC	RARS,
chr7 : 24668660 - 24623666 : MPP6,	0	5.66588	0	0	3.13886	5.49776	0	3.51632	0	6.01984	1.16842	0.550394	0.999043	chr7	24668660	24623666	+	6	GTAG	ACTAGATTTGGAACTACGGTGCCAT	AGGTTTTCCAAGACTTGCTGCATTG	MPP6,
chr11 : 108158920 - 108162180 : NPAT,	0	0	6.79759	4.60326	3.13886	0	0	3.51632	0	0	-1.36721	0.552832	0.999043	chr11	108158920	108162180	-	5	GTAG	TAAACATTCTGGACACATAAGAACA	TCCACCAAATTATTTACTTGTTTTC	NPAT,
chr5 : 113004077 - 112985835 : DCP2,	9.4935	0	0	3.83605	0	2.74888	0	5.27448	0	0	-1.30287	0.552875	0.999043	chr5	113004077	112985835	+	6	GTAG	AATGTCTGACCTTTTAAAAGGAAAG	GCTGGGAATATGCAAAATAAATCGG	DCP2,
chr2 : 229858772 - 229880128 : TRIP12,	5.42486	19.8306	7.93052	4.60326	6.27773	4.81054	6.66805	2.63724	13.1524	9.02976	-0.394826	0.553092	0.999043	chr2	229858772	229880128	-	5	GTAG	TCTGGATTACAGGCCAAATTAGCAA	TACCCTTTCTAGACACTACCATTCA	TRIP12,
chr16 : 58574609 - 58583182 : CNOT1,	0	7.08235	0	0	0	2.74888	0	0	0	0	-1.83453	0.554101	0.999043	chr16	58574609	58583182	-	5	GTAG	TGGCCTGTCTGCAAGCTTGTGCAGG	GATTATATTGCGACATTCTTCAATA	CNOT1,
chr5 : 79669028 - 79640851 : PAPD4,	8.13729	5.66588	5.66465	3.83605	0	2.06166	6.66805	0	0	12.0397	-0.738172	0.554416	0.999043	chr5	79669028	79640851	+	6	GTAG	TTAAATATTATGCTACAGAATTTGA	ATAACTCCAGTATCTGCTGACTCAA	PAPD4,
chr15 : 80978931 - 80982182 : MESDC2,	0	9.91528	0	0	0	0	4.44537	0	0	0	-1.76966	0.555063	0.999043	chr15	80978931	80982182	-	5	GTAG	TGTTGCTTTTTCCCATTTACACTTG	CTCCTTCTTCAATGTCATCATCTTT	MESDC2,
chr4 : 73085249 - 73092300 : ANKRD17,	36.6178	42.4941	27.1903	39.1277	39.2358	39.1715	30.0062	58.8983	35.0731	39.129	0.154086	0.555102	0.999043	chr4	73085249	73092300	-	5	GTAG	ACTCCGTGTTCATCAGCATCAAATG	TTGTCTTGTTGATTCAGTGCCACCC	ANKRD17,
chr3 : 170113360 - 170136665 : PHC3,	10.8497	15.5812	0	4.60326	14.1249	15.1188	6.66805	7.03264	9.86432	6.01984	0.392853	0.558191	0.999043	chr3	170113360	170136665	-	5	GTAG	GAGATGGAAGACATGATTGCTGAAG	GGCTGCGTAATGTTAAATTCTGAAC	PHC3,
chr11 : 128480191 - 128490576 : ETS1,	0	0	0	2.30163	0	0	6.66805	5.27448	0	0	1.63527	0.55856	0.999043	chr11	128480191	128490576	-	5	GTAG	GCTGCTGCCCTAGCTGGCTACACAG	AGTGGGACATCTGCACATTCCATAT	ETS1,
chr17 : 74203700 - 74209311 : RPL38,	0	16.9976	18.1269	0	15.6943	0	0	0	0	0	-1.74023	0.55875	0.999043	chr17	74203700	74209311	-	0	ACTC	CTAGAGACACTCACAGCAAGCAGCA	ACTGAAGCAGTCCCTGCCCCCCGGT	RPL38,
chr22 : 41871035 - 41866831 : SREBF2,	0	7.08235	3.39879	0	0	0	0	0	5.48018	0	-1.55003	0.55916	0.999043	chr22	41871035	41866831	+	6	GTAG	CCAGACGGCTGCCCTTCAAGTACCA	TGATTACTGACAAATTGCAGCATCT	SREBF2,
chr5 : 94050731 - 94057203 : FAM172A,	0	5.66588	0	4.60326	0	0	0	0	5.48018	0	-1.53503	0.56209	0.999043	chr5	94050731	94057203	-	5	GTAG	GAAAAGATACGAGGCTCTAGGAGAG	GTCAATTCTTTGTAGTAAATATTTC	FAM172A,
chr2 : 73573424 - 73572262 : ALMS1,	0	0	6.79759	0	0	2.74888	0	0	0	0	-1.7972	0.562377	0.999043	chr2	73573424	73572262	+	6	GTAG	GCACACCAGAAGGAGACACATCCAG	TCAAATTCTGAATGACATTCGGACT	ALMS1,
chr12 : 350621 - 366104 : KDM5A,	18.987	0	4.53172	0	10.2013	0	14.4474	5.27448	14.2485	17.307	0.814119	0.562588	0.999043	chr12	350621	366104	-	5	GTAG	GAGAAAGATTCTGCCAGAAGAAGAG	CAAAACCTCCTTTGCTGGCAACAAT	KDM5A,
chr5 : 123575963 - 123545417 : CSNK1G3,	4.06864	4.24941	0	3.83605	0	0	2.22268	2.63724	0	3.7624	-1.07754	0.562612	0.999043	chr5	123575963	123545417	+	6	GTAG	AGCATAAACACACATTTAGGAAAAG	GATGTGAGCTGATATTGATAGAGAG	CSNK1G3,
chr5 : 36986301 - 36982165 : NIPBL,	37.974	43.9105	39.6526	40.6622	53.3607	26.8016	50.0104	56.2611	50.4176	34.6141	0.148176	0.566616	0.999043	chr5	36986301	36982165	+	6	GTAG	AATAAACCATCAAAGTCAAATAAAG	ATTAGCTATCAGAATACATATATTC	NIPBL,
chr6 : 106568971 - 106560803 : AIM1,	0	7.08235	0	0	0	0	0	0	0	3.00992	-1.74654	0.572821	0.999043	chr6	106568971	106560803	+	6	GTAG	CTACAAAGCCCTTACACTTTAAAGG	ACTGCCATATTCATAAGTAACCCAT	AIM1,
chr7 : 139284574 - 139279318 : UBN2,	0	0	4.53172	0	0	0	4.44537	0	7.67225	4.51488	1.27396	0.573255	0.999043	chr7	139284574	139279318	+	6	GTAG	TTCAGTGGTAACAGCCAGTGTGCAG	TGCAGGAATCACCTTTTTCTTTGCC	UBN2,
chr17 : 47917130 - 47915312 : SP2,	4.06864	4.24941	5.66465	5.37047	6.27773	2.06166	12.2248	4.3954	3.28811	12.0397	0.456464	0.5736	0.999043	chr17	47917130	47915312	+	6	GTAG	GGCAGCTGAGCCGACACCTACTCAG	GTGGCAGCCATGCTGGTCTGTGGAT	SP2,
chr7 : 30550636 - 30574881 : AC005154.6,RP4-777O23.3,AC005154.6,	0	0	13.5952	9.20653	0	10.3083	0	0	0	2.25744	-1.43426	0.574301	0.999043	chr7	30550636	30574881	-	5	GTAG	CAGTAACCCTGTGTTCTATCCACAG	GGCTTCAGTTATTGCAGGCTGGACC	AC005154.6,RP4-777O23.3,AC005154.6,
chr1 : 151118139 - 151088190 : GABPB2,	6.78107	4.24941	0	6.13768	9.41659	3.4361	7.77939	4.3954	5.48018	6.01984	0.495965	0.575394	0.999043	chr1	151118139	151088190	+	6	GTAG	CACCATGGTTGAAGAGGTGGCTGAG	TCTTTCCCAAGTCCACCAAAGACAT	GABPB2,
chr9 : 93498886 - 93471141 : FAM120A,	0	4.24941	0	5.37047	0	1.37444	0	0	4.38414	0	-1.3598	0.576375	0.999043	chr9	93498886	93471141	+	6	GTAG	TCATTTCATCCACCACATTACTTAG	GGTGATCCTCAATGCTCTGTGCAAC	FAM120A,
chr3 : 170113360 - 170149244 : PHC3,	0	0	3.39879	0	2.35415	2.74888	3.33402	0	0	3.7624	1.25833	0.576687	0.999043	chr3	170113360	170149244	-	5	GTAG	GAGATGGAAGACATGATTGCTGAAG	GTGTAGGAGAAGTGGAGAGGTTGAT	PHC3,
chr11 : 108185232 - 108190500 : NPAT,	0	0	0	3.83605	5.49301	2.06166	0	2.63724	0	3.7624	1.19055	0.579462	0.999043	chr11	108185232	108190500	-	5	GTAG	AATTGATGAATTCCTAGGACTTCCG	AAACCTTGGGGAACTTTGCATGCTC	NPAT,
chr11 : 76472840 - 76463821 : EMSY,	12.2059	12.7482	10.1964	13.8098	9.41659	6.18498	14.4474	7.91172	31.785	20.317	0.268519	0.580209	0.999043	chr11	76472840	76463821	+	6	GTAG	GTGGTCATGTCAACAGTAGCACAAG	TCATCTTCATCTGAACAGCTTACAC	EMSY,
chr1 : 117405645 - 117402186 : MAN1A2,	0	0	0	3.06884	0	0	11.1134	2.63724	0	0	1.48127	0.580236	0.999043	chr1	117405645	117402186	+	6	GTAG	AAAGGACACTCCCCTAACATATTTG	ATTTCTCAGACGTTCTTCCTCTTCC	MAN1A2,
chr18 : 50921187 - 50918110 : ME2,	0	0	0	8.43932	3.92358	0	0	0	0	0	-1.69676	0.580299	0.999043	chr18	50921187	50918110	+	6	GTAG	TGACAAGTATGGTTTATTAGTTAAG	TGTAAAATGGGTCTTTTAAGAGTGC	ME2,
chr9 : 128515639 - 128508876 : GLE1,	0	0	0	9.97374	0	4.81054	0	0	0	0	-1.62695	0.581568	0.999043	chr9	128515639	128508876	+	6	GTAG	ACTGGTACACAGAATGAAAGGAACA	GAGACATACATTCTTCTAAAACATC	GLE1,
chr15 : 58991326 - 58991818 : RNF111,	0	0	3.39879	0	8.63188	0	0	0	0	5.26736	1.45097	0.5823	0.999043	chr15	58991326	58991818	-	0	GTTT	CTCTTTAAAATGTAAGCTCAGCTAA	TATTTTATGTGTAGTAACCAAATAC	RNF111,
chr1 : 243552729 - 243843282 : AKT3,	0	0	4.53172	0	0	9.62107	0	0	0	7.5248	1.34297	0.583194	0.999043	chr1	243552729	243843282	-	5	GTAG	TCTTGATAAAGGATCCAAATAAACG	TCCCACTCTCTAGTGATGACTCAGC	AKT3,
chr1 : 151427823 - 151442205 : POGZ,	5.42486	0	4.53172	2.30163	0	0	3.33402	0	5.48018	0	-1.10582	0.587138	0.999043	chr1	151427823	151442205	-	5	GTAG	AGCGGACCTGAGTCTTCAATGAAAG	CATGAACAGGTCGGTGTCCGCCATG	POGZ,
chr16 : 50754424 - 50749576 : CYLD,	6.78107	0	11.3293	11.5082	7.84716	2.74888	6.66805	7.03264	3.28811	6.01984	-0.435733	0.587408	0.999043	chr16	50754424	50749576	+	6	GTAG	TTGCACATCAATGATATCATCCCAG	TGTTTTCAGCAACGTGGTGTCCATG	CYLD,
chr7 : 10990847 - 10982372 : PHF14,	21.6994	31.1623	30.5891	30.6884	32.9581	37.1099	28.8949	22.8561	19.7286	48.9112	0.16292	0.588167	0.999043	chr7	10990847	10982372	+	6	GTAG	AATTGTGGCATTACAGTCCATGAAG	CTTCCATTACCACTCCCTTCAGAAT	PHF14,
chr11 : 108235834 - 108227595 : ATM,	6.78107	11.3318	13.5952	0	8.63188	12.37	0	0	6.57621	3.7624	-0.568495	0.590329	0.999043	chr11	108235834	108227595	+	6	GTAG	GAAATATCTCAGCAACAGTGGTTAG	ACAATTTCAGAACACACATCACTGT	ATM,
chrX : 135556300 - 135545423 : INTS6L,	0	0	0	3.06884	0	3.4361	0	0	9.86432	0	1.4396	0.591447	0.999043	chrX	135556300	135545423	+	6	GTAG	TACCCAGTTTTACTTCCTCTTTTAG	TTGCATGATTTTCCTTCCAACCAGC	INTS6L,
chr2 : 168129541 - 168140758 : STK39,	4.06864	0	0	0	3.92358	3.4361	0	2.63724	3.28811	0	1.1753	0.591483	0.999043	chr2	168129541	168140758	-	5	GTAG	AGACATAGCCCAAAGAGCCAAAAAG	GCTAGGAACGCACTTACCCCAAAAT	STK39,
chr4 : 139889357 - 139890967 : MAML3,	4.06864	5.66588	0	3.06884	3.13886	0	0	3.51632	0	3.00992	-0.964826	0.591574	0.999043	chr4	139889357	139890967	-	5	GTAG	CGCTGCACTTCCATCCCACGGTCAG	ACTTCCTTTTCACAGTCTCTTGTAG	MAML3,
chr7 : 158788004 - 158799072 : ESYT2,	0	5.66588	0	6.90489	5.49301	6.18498	3.33402	0	5.48018	9.78224	0.661165	0.591639	0.999043	chr7	158788004	158799072	-	5	GTAG	GTCTATCTTCTTCCTTAGGAAACCA	CTCTTTCAGTGTCTGGAAAATGAAC	ESYT2,
chr20 : 49091022 - 49074785 : CSE1L,	0	0	4.53172	0	0	4.12332	0	0	0	12.7922	1.32188	0.591776	0.999043	chr20	49091022	49074785	+	6	GTAG	TCCAAAACAACCAAGTTTATCAAGA	TCTTCAAATGCTTCTTCATCAGCAG	CSE1L,
chr9 : 33986760 - 34017189 : UBAP2,	0	5.66588	3.39879	3.06884	3.92358	0	0	0	0	4.51488	-1.08466	0.592116	0.999043	chr9	33986760	34017189	-	5	GTAG	CGTGGCAAGCGAGCCCGGGGTAGAG	ATAATGTATGTACAAAATAGAAAAT	UBAP2,
chr1 : 172557794 - 172551512 : SUCO,	8.13729	0	3.39879	0	17.2638	8.24663	0	0	0	4.51488	0.831055	0.596388	0.999043	chr1	172557794	172551512	+	6	GTAG	TGCTTCAGATAATTTAAAAAATGAG	ACAACATACACGCCAGCTGGGAAGC	SUCO,
chr5 : 176290955 - 176289654 : SIMC1,	0	0	5.66465	2.30163	0	0	4.44537	0	0	0	-1.48568	0.597574	0.999043	chr5	176290955	176289654	+	6	GTAG	AATACCGGATAAAGACACAAGAGAG	TCTCTCTAGTTAAGTCAATGAAGTC	SIMC1,
chr7 : 17890363 - 17897446 : SNX13,	0	5.66588	0	7.6721	0	0	0	0	0	8.27728	-1.26194	0.600451	0.999043	chr7	17890363	17897446	-	5	GTAG	ACGCACTCATTCAGTTTGCTACTAG	CCCATCCCCATATGGATAGACTGGC	SNX13,
chr14 : 91797785 - 91813825 : TC2N,	0	0	5.66465	5.37047	24.3262	0	6.66805	5.27448	0	0	1.11225	0.600519	0.999043	chr14	91797785	91813825	-	5	GTAG	ATCTTCAGCCAAGGAAGGTTCCAAC	ACAAACTTCCAATCTTAATATTAAT	TC2N,
chr13 : 19633902 - 19646551 : MPHOSPH8,	10.8497	0	5.66465	16.8786	7.06245	0	0	11.428	5.48018	11.2872	-0.522443	0.60095	0.999043	chr13	19633902	19646551	-	0	ACTC	CGAACACATCCTCTCCGTCCTCCTC	AAGAAAAAGAAAAAATTGAGGCAGA	MPHOSPH8,
chr12 : 122340753 - 122341697 : CLIP1,	4.06864	11.3318	0	8.43932	19.6179	3.4361	11.1134	6.15356	3.28811	4.51488	0.42935	0.601454	0.999043	chr12	122340753	122341697	-	5	GTAG	TGAAAAGAATGCTGAAAGTAGCAAG	GTGACTTTTCTGAAACTGTAGCCAC	CLIP1,
chr1 : 161802272 - 161778244 : ATF6,	0	0	7.93052	2.30163	0	3.4361	0	0	0	3.00992	-1.22913	0.603131	0.999043	chr1	161802272	161778244	+	6	GTAG	TACCATGAGAAATGTCGGTTCAGAT	CCGAGTTCAGCAAAGAGAGCAGAAT	ATF6,
chr21 : 31700995 - 31705467 : SCAF4,	12.2059	0	3.39879	8.43932	3.13886	15.806	6.66805	6.15356	12.0564	4.51488	0.406287	0.604634	0.999043	chr21	31700995	31705467	-	5	GTAG	TGAACAGAAAACTGCATTTGACAAG	CTATTTGAACTACATGCTTATAAAG	SCAF4,
chr4 : 109516640 - 109491327 : SEC24B,	6.78107	0	0	3.06884	3.92358	0	0	0	0	2.25744	-1.23482	0.606192	0.999043	chr4	109516640	109491327	+	6	GTAG	AGTCACTCCTAGAAAATCTAGACAA	CTTGTGGTAGAAGAGCTGTCAACAC	SEC24B,
chr1 : 151427823 - 151430841 : POGZ,	0	0	5.66465	2.30163	3.13886	8.24663	0	0	0	11.2872	0.914764	0.607783	0.999043	chr1	151427823	151430841	-	5	GTAG	AGCGGACCTGAGTCTTCAATGAAAG	CCTTGCTGGACCAAAGGATTGCCAG	POGZ,
chr3 : 170136419 - 170149244 : PHC3,	2.71243	2.83294	10.1964	6.90489	8.63188	8.24663	4.44537	13.1862	6.57621	3.7624	0.374145	0.610523	0.999043	chr3	170136419	170149244	-	5	GTAG	AGTATTCACCAGTTAATAGCACCAG	GTGTAGGAGAAGTGGAGAGGTTGAT	PHC3,
chr1 : 13782831 - 13778418 : PRDM2,	0	4.24941	7.93052	3.06884	0	2.74888	3.33402	4.3954	2.19207	1.50496	-0.70368	0.6107	0.999043	chr1	13782831	13778418	+	6	GTAG	CCAAGCAGGAGCTGAAGGACTTCAG	GGCTTCTCTTCGTCTTCTTTAGGAC	PRDM2,
chr7 : 139715932 - 139717015 : HIPK2,	0	4.24941	12.4622	3.83605	2.35415	2.74888	0	10.549	0	3.7624	-0.65814	0.61164	0.999043	chr7	139715932	139717015	-	5	GTAG	CCTACTTGCAGTCCAGATATTACAG	AAAACTTGCACATGTGAGGCCATAC	HIPK2,
chr9 : 131147584 - 131139281 : NUP214,	0	0	6.79759	0	3.92358	0	0	5.27448	16.4405	0	1.32169	0.61201	0.999043	chr9	131147584	131139281	+	6	GTAG	AGCGGCAAAGCCAGGCTCTCCCCAG	CCAGTAGCCAAGATTCCCAATTAAT	NUP214,
chr7 : 92003235 - 91992885 : AKAP9,	0	0	3.39879	3.06884	0	0	0	3.51632	0	0	-1.48284	0.612861	0.999043	chr7	92003235	91992885	+	6	GTAG	ACTCAATGTACTTAAATCAGAACAG	AATCATCAACACCAAATTCTTCTTC	AKAP9,
chr6 : 111177665 - 111172695 : SLC16A10,	5.42486	0	3.39879	8.43932	3.92358	6.87219	0	0	4.38414	0	-0.776841	0.617229	0.999043	chr6	111177665	111172695	+	6	GTAG	ATACTTTGTGCCTTATGTTCACTTG	CCCATGGAGAGAGAACCTACCCATG	SLC16A10,
chr10 : 110985765 - 110964125 : SHOC2,	8.13729	5.66588	5.66465	0	7.84716	2.74888	4.44537	0	0	3.00992	-0.663349	0.618859	0.999043	chr10	110985765	110964125	+	6	GTAG	CTGCTAGACCTCCCAGATACTATAG	GTCAATCAATGATTCATTAGAGTTC	SHOC2,
chr10 : 110130486 - 110124017 : ADD3,	0	0	0	3.06884	3.13886	2.74888	3.33402	1.75816	0	0	1.14801	0.619843	0.999043	chr10	110130486	110124017	+	6	GTAG	GAACGTAAACAACAAGGCCTAGAAG	TGTAAGCATAGCCTGTTCTATACCC	ADD3,
chr14 : 45118028 - 45130790 : FKBP3,	0	11.3318	20.3928	12.2754	22.7568	15.1188	11.1134	11.428	9.86432	9.78224	0.263902	0.620045	0.999043	chr14	45118028	45130790	-	5	GTAG	GAAAGAAAGGACAGCCTGATGCCAA	TTAATGTTTCCTAATAATTTATGTT	FKBP3,
chr22 : 31441774 - 31443094 : EIF4ENIF1,	0	0	0	3.06884	0	3.4361	5.55671	2.63724	0	0	1.23848	0.620956	0.999043	chr22	31441774	31443094	-	5	GTAG	CATCTTCCAAGTTTGCTCCAAACTG	AGGTAGGGGTAAAGGAAGGAGAAAG	EIF4ENIF1,
chr8 : 123105464 - 123077111 : TBC1D31,	4.06864	0	0	4.60326	0	2.06166	0	3.51632	0	0	-1.21795	0.621731	0.999043	chr8	123105464	123077111	+	6	GTAG	GACTGGTGATTTTGAAAGTAAAAAG	GTTGTGAATAATGTTCACTATAATT	TBC1D31,
chr2 : 99195756 - 99194751 : RP11-111H13.1,MRPL30,	4.06864	0	0	3.83605	0	0	0	7.91172	9.86432	4.51488	0.884793	0.623638	0.999043	chr2	99195756	99194751	+	6	GTAG	TGCAAATTGTTTTTATTTAAAGATG	GATCTTCAGGTGAGGCCTGAAACAC	RP11-111H13.1,MRPL30,
chr3 : 170113360 - 170129552 : PHC3,	8.13729	0	0	0	3.92358	0	0	10.549	8.76828	0	0.954478	0.625216	0.999043	chr3	170113360	170129552	-	5	GTAG	GAGATGGAAGACATGATTGCTGAAG	TGAGGCTGAATTGGAGAATATGAAG	PHC3,
chr2 : 231460795 - 231463294 : NCL,	6.78107	0	7.93052	0	6.27773	0	0	0	0	4.51488	-1.00878	0.627228	0.999043	chr2	231460795	231463294	-	0	CCCC	GCTGCAAAAGTTGTTCCTGTGAAAG	TTTGGAGGAGGAGCCATTTTCTTGG	NCL,
chr4 : 128992167 - 129003876 : SCLT1,	8.13729	0	0	3.83605	6.27773	2.06166	0	0	0	0	-1.08573	0.627655	0.999043	chr4	128992167	129003876	-	5	GTAG	TCGAACAACTCCGAAAAAAACTTAG	AGCATCTTTTAATTCACTGTGCAAC	SCLT1,
chr6 : 30670410 - 30671274 : DHX16,	0	0	9.06345	6.90489	0	4.12332	12.2248	9.66988	0	11.2872	0.600837	0.627939	0.999043	chr6	30670410	30671274	-	5	GTAG	GGCCGAGGAAGACCGGAAGGCCATG	TTTCTACCACTGCCTTTCGTGGTAC	DHX16,
chr14 : 73103313 - 73106286 : RBM25,	0	5.66588	0	0	0	2.74888	0	0	0	0	-1.50802	0.628298	0.999043	chr14	73103313	73106286	-	0	CCTA	TCCTTTTCTCGTTCACGTTCTCTTT	GAAGAAGAAAGAAGAAGAGAAATGG	RBM25,
chr12 : 14466590 - 14456561 : ATF7IP,	2.71243	0	5.66465	4.60326	0	4.81054	0	5.27448	0	0	-0.942992	0.629461	0.999043	chr12	14466590	14456561	+	6	GTAG	GAAAGCAGCTGATAGCACATCACAG	GTGATACTGGTGGGTTGGGTGGATG	ATF7IP,
chr4 : 82821037 - 82829058 : SEC31A,	0	12.7482	0	0	5.49301	2.74888	0	0	0	0	-1.17814	0.630338	0.999043	chr4	82821037	82829058	-	5	GTAG	GTATGATAAACTTAGGGAACAGACA	GGGTCATTCCAACCATTCTGAGGAC	SEC31A,
chr9 : 36352742 - 36353331 : RNF38,	0	0	0	5.37047	0	2.74888	0	0	0	0	-1.49349	0.631689	0.999043	chr9	36352742	36353331	-	5	GTAG	ATCCCAGCTTACTGCCATATGTGTT	CTTCATTTTCTATCCTTTGCAGAGG	RNF38,
chr16 : 68214432 - 68190768 : NFATC3,	0	0	0	9.20653	0	0	0	5.27448	0	0	-1.41276	0.635322	0.999043	chr16	68214432	68190768	+	6	GTAG	AGCTCCTTTCTGGAGAATCTAGAGG	TCTCTGTGTTCTTGCTTCATCAAAA	NFATC3,
chr9 : 125657651 - 125672643 : MAPKAP1,	10.8497	9.91528	7.93052	0	0	5.49776	7.77939	4.3954	6.57621	6.77232	-0.452178	0.636372	0.999043	chr9	125657651	125672643	-	5	GTAG	CGAGTATTCCAAATTTGATGGCAAG	CATATTGTTTCACGAGCTCACCTAC	MAPKAP1,
chr2 : 101266879 - 101257791 : CNOT11,	0	8.49881	9.06345	0	5.49301	2.06166	15.5588	0	6.57621	8.27728	0.538501	0.637568	0.999043	chr2	101266879	101257791	+	6	GTAG	TACATTCAATGGAAGTTGTAAATCG	GGTGGAGTTATAGGAGGTAAAAATC	CNOT11,
chr2 : 231460781 - 231463280 : NCL,	4.06864	5.66588	0	3.06884	0	5.49776	0	4.3954	0	0	-0.928576	0.637638	0.999043	chr2	231460781	231463280	-	0	GACT	TCCTGTGAAAGCCAAGAACGTGGCT	CTTCTTCTACCTCCTTTGGAGGAGG	NCL,
chr15 : 85115487 - 85113873 : PDE8A,	4.06864	0	0	0	0	4.12332	0	0	9.86432	0	1.22343	0.639481	0.999043	chr15	85115487	85113873	+	6	GTAG	AATGAATATGTTCTTTCAACAAAAA	GGGCAGCATTGATAATATTGATTAC	PDE8A,
chr1 : 111161296 - 111147642 : CEPT1,	13.5621	0	13.5952	7.6721	12.5555	16.4933	6.66805	6.15356	10.9604	10.5347	0.280977	0.639594	0.999043	chr1	111161296	111147642	+	6	GTAG	TTTCTGGAACATTGCGATTTGGAAT	GTAGGTTTTTGTGGCTGGTGCTTAC	CEPT1,
chr13 : 21167988 - 21168399 : SKA3,	0	0	4.53172	5.37047	0	9.62107	3.33402	4.3954	0	7.5248	0.707958	0.639685	0.999043	chr13	21167988	21168399	-	5	GTAG	TTAAAAATGCGAGGAATAATAAAAG	GAGTTAATGGCTTCTTGCTCGTGTA	SKA3,
chrX : 118590302 - 118584735 : DOCK11,	0	0	4.53172	3.06884	0	4.12332	5.55671	4.3954	0	6.01984	0.780694	0.640402	0.999043	chrX	118590302	118584735	+	6	GTAG	CCAAAATCCAGAGTTCTATGATGAG	GCCTTGAGTATCTTTGAAAATGGGT	DOCK11,
chr2 : 226914351 - 226864604 : RHBDD1,	5.42486	0	0	0	0	2.74888	0	0	0	0	-1.45029	0.641813	0.999043	chr2	226914351	226864604	+	6	GTAG	TTACAAGCCAGCCTCTGGGACCGAG	TGGGGAGATATACAGACGGCTGAAC	RHBDD1,
chr4 : 53444103 - 53414615 : FIP1L1,	0	7.08235	6.79759	0	0	0	0	9.66988	0	0	-1.0986	0.642033	0.999043	chr4	53444103	53414615	+	6	GTAG	GCACGTGCATTTCCATATGGCAATG	CTGAGACTGAGAAGAAGTGCTGTTT	FIP1L1,
chr3 : 123931102 - 123949132 : CCDC14,	0	0	4.53172	0	6.27773	0	0	3.51632	0	4.51488	1.07751	0.643042	0.999043	chr3	123931102	123949132	-	5	GTAG	TGACTCGACTAAGAGAATTAACCAG	ATCTGTTTCTTATTATCTGAAGATG	CCDC14,
chr5 : 160089506 - 160094065 : PWWP2A,	2.71243	0	0	0	3.92358	2.06166	0	0	0	3.00992	1.22471	0.644624	0.999043	chr5	160089506	160094065	-	5	GTAG	CAAACAATTATCTGTGAGAGGCCAG	CACAGGGATACCATGGGGCCCAAAC	PWWP2A,
chr10 : 7802854 - 7797047 : ATP5C1,	10.8497	14.1647	19.2598	8.43932	14.9096	9.62107	6.66805	12.3071	10.9604	12.7922	-0.208188	0.648444	0.999043	chr10	7802854	7797047	+	6	GTAG	AAATTATCTCTGGTGCTGCAGCTCT	TTGATGGACTTTAGTCTCCTGGTGA	ATP5C1,
chr6 : 89084643 - 89083753 : PNRC1,	8.13729	8.49881	11.3293	6.90489	14.1249	11.6827	10.0021	2.63724	8.76828	14.2971	0.251584	0.653883	0.999043	chr6	89084643	89083753	+	6	GTAG	AGTTTAAATCTGTGGCACAATCAAT	ATTTTCCCATCTTTGATTTTAAAAC	PNRC1,
chr1 : 41046407 - 41075451 : SCMH1,	5.42486	4.24941	3.39879	3.83605	3.13886	0	0	3.51632	9.86432	0	-0.638656	0.655028	0.999043	chr1	41046407	41075451	-	5	GTAG	CACAGCCACGACAGGTACCTACCAG	GGATAGGGATTCTTTGGAATCACAA	SCMH1,
chr20 : 51516784 - 51524110 : NFATC2,	13.5621	7.08235	0	0	3.92358	0	11.1134	0	0	3.7624	-0.712925	0.656321	0.999043	chr20	51516784	51524110	-	5	GTAG	AACTGGAGGCCACCCTGTGGTTCAG	GCGACCTTATGTGCATTCGGCTCTT	NFATC2,
chr2 : 231460754 - 231461672 : NCL,	0	8.49881	0	0	0	4.81054	0	0	0	0	-1.35836	0.656368	0.999043	chr2	231460754	231461672	-	0	GAAC	GGATGAAGATGAAGAAGAGGATGAT	CATCTTCATCCTCATCCTCGTCCTC	NCL,
chr7 : 103321932 - 103322794 : DNAJC2,	8.13729	5.66588	9.06345	4.60326	17.2638	4.81054	3.33402	4.3954	0	0	-0.446441	0.658668	0.999043	chr7	103321932	103322794	-	5	GTAG	GCAAAAACTTCGAAACTCATGCAAG	TTCAATCCATCTCCTCTCATCACGA	DNAJC2,
chr7 : 158902595 - 158869855 : WDR60,	0	2.83294	3.39879	0	0	0	14.4474	0	0	3.7624	0.964303	0.65973	0.999043	chr7	158902595	158869855	+	6	GTAG	GAATTTGAAAAGGAGCCCAGGACAG	TCCAGGTATCATCTTTGGTTCTTCT	WDR60,
chr10 : 110598290 - 110596398 : SMC3,	8.13729	5.66588	0	7.6721	3.13886	0	7.77939	6.15356	0	5.26736	-0.53674	0.66044	0.999043	chr10	110598290	110596398	+	6	GTAG	GTCAGAGAAAACCTTCATGCCTAAG	GCACCCCGATGGCTGACTTGGTCAC	SMC3,
chr2 : 175111568 - 175121540 : ATF2,	16.2746	8.49881	11.3293	13.8098	4.7083	13.0572	11.1134	4.3954	16.4405	15.0496	-0.220994	0.660815	0.999043	chr2	175111568	175121540	-	5	GTAG	ACCAGTACAGTCAGAAGCAAAAATG	CCAAATGATCCTCGTTGGTAAAACG	ATF2,
chr2 : 73573424 - 73534824 : ALMS1,	5.42486	0	0	0	0	0	0	0	0	3.00992	-1.3623	0.66179	0.999043	chr2	73573424	73534824	+	6	GTAG	GCACACCAGAAGGAGACACATCCAG	TTATATGGCAATAATAAAGGCTGGC	ALMS1,
chr13 : 114052052 - 114057474 : RASA3,	6.78107	0	0	0	0	11.6827	13.3361	0	0	0	1.31284	0.663539	0.999043	chr13	114052052	114057474	-	5	GTAG	GTTTTCCGGAGGGATTCCATCATAG	TTTCAAGGAAAGCTGGAGCCAGTCT	RASA3,
chr8 : 66572482 - 66593194 : MYBL1,	5.42486	0	7.93052	3.06884	0	5.49776	3.33402	2.63724	0	4.51488	-0.614715	0.663937	0.999043	chr8	66572482	66593194	-	5	GTAG	AAAATATGGACCTCTTAAAATTGTG	GTGACACATACTGATACCCAGGGAT	MYBL1,
chr8 : 132722040 - 132757294 : TMEM71,	5.42486	0	6.79759	0	0	9.62107	0	6.15356	9.86432	2.25744	0.620037	0.667054	0.999043	chr8	132722040	132757294	-	5	GTAG	GCTTAATCATTTCTGCATGTGCAAG	TATTCTCTTTCCAACCTGGAAGAAC	TMEM71,
chrX : 101041317 - 101042312 : TRMT2B,	0	4.24941	4.53172	0	0	2.74888	0	3.51632	0	0	-1.0448	0.669649	0.999043	chrX	101041317	101042312	-	5	GTAG	GTTGAGCTATGAAGAACAGCTCAAG	ATCCAAAGAACACACTGAAATCCAC	TRMT2B,
chr2 : 148485950 - 148483110 : MBD5,	4.06864	0	0	0	0	0	5.55671	0	7.67225	0	1.13068	0.669825	0.999043	chr2	148485950	148483110	+	6	GTAG	GGCTTGTCTGTTTCAGAACTTTCAG	ATGGAGGATGATGGTCCTGAACCGC	MBD5,
chr20 : 44503815 - 44512994 : SERINC3,	0	7.08235	0	0	0	4.12332	0	0	0	0	-1.31016	0.670019	0.999043	chr20	44503815	44512994	-	5	GTAG	TTGTTCTCTGCCTCTTGTATTCTAG	ATCCCCCTTCACAAAATCCAGGAAT	SERINC3,
chr1 : 111148053 - 111147642 : CEPT1,	0	4.24941	6.79759	0	3.13886	0	0	0	0	5.26736	-0.952623	0.676051	0.999043	chr1	111148053	111147642	+	6	GTAG	CTACTGCCCTACAGCTACAGAGCAG	GTAGGTTTTTGTGGCTGGTGCTTAC	CEPT1,
chr3 : 170122591 - 170136665 : PHC3,	0	7.08235	0	2.30163	0	0	6.66805	0	0	0	-1.10724	0.676999	0.999043	chr3	170122591	170136665	-	5	GTAG	TTGACTTCTGAACATCCTTTGTTAG	GGCTGCGTAATGTTAAATTCTGAAC	PHC3,
chr2 : 105857765 - 105858268 : NCK2,	9.4935	11.3318	7.93052	0	0	0	12.2248	0	10.9604	0	-0.905047	0.677246	0.999043	chr2	105857765	105858268	-	0	AACA	TCCAGGTGAGCATGATAAAGAGATC	ACTGACCACGGTTTGTTTTTGTTTT	NCK2,
chr11 : 2969803 - 2979237 : NAP1L4,	0	7.08235	0	0	0	0	4.44537	0	0	0	-1.27789	0.677529	0.999043	chr11	2969803	2979237	-	5	GTAG	GGACATGCTGAGTGAATTAGTCCAG	TCTGCCATCTGAATGTTTTTATCCC	NAP1L4,
chr2 : 231460788 - 231461913 : NCL,	4.06864	0	0	0	2.35415	4.12332	5.55671	0	0	0	1.0171	0.677987	0.999043	chr2	231460788	231461913	-	0	CGAA	AAGTTGTTCCTGTGAAAGCCAAGAA	CTTTTTGCCTGGAGTGACAGCTGCT	NCL,
chr11 : 121060085 - 121045674 : TBCEL,	5.42486	0	0	2.30163	0	3.4361	0	7.03264	5.48018	3.00992	0.712098	0.678176	0.999043	chr11	121060085	121045674	+	6	GTAG	TTCCACAGGAAGAAGTGCCATTCAG	TGATCCATCTTTCTTTCTTAAAATG	TBCEL,
chr5 : 160051183 - 160035140 : TTC1,	0	0	0	6.90489	0	0	0	4.3954	0	0	-1.26692	0.679977	0.999043	chr5	160051183	160035140	+	6	GTAG	GAAAGACTAAAAGAAGAGATGTTAG	GTCTAGTGCTCTCTTCTCTTCTTTT	TTC1,
chr16 : 53157541 - 53155926 : CHD9,	0	0	4.53172	0	0	5.49776	0	0	3.28811	4.51488	0.971341	0.681339	0.999043	chr16	53157541	53155926	+	6	GTAG	AAATCACCTATGTTTACAGCGACAG	TGACATGTCATGAAGTGTCAAAATC	CHD9,
chr9 : 20413721 - 20456786 : MLLT3,	0	0	0	3.83605	0	3.4361	4.44537	0	4.38414	0	1.00037	0.681374	0.999043	chr9	20413721	20456786	-	5	GTAG	GGAGAATATATCCTCTAAATCTGAT	ACTTTGTAAGGTGGATCTTTGCACA	MLLT3,
chr2 : 119945240 - 119926598 : PTPN4,	4.06864	0	4.53172	0	0	2.06166	0	0	4.38414	0	-1.00864	0.68169	0.999043	chr2	119945240	119926598	+	6	GTAG	TCCATCTTCTCCTGAAAAACCCACT	AACTGATTGGACTTCAGTTCTCCCA	PTPN4,
chr1 : 151118139 - 151093192 : GABPB2,	0	0	0	2.30163	0	0	4.44537	4.3954	0	0	1.2055	0.682237	0.999043	chr1	151118139	151093192	+	6	GTAG	CACCATGGTTGAAGAGGTGGCTGAG	CCTTGGCATTCACATCTGCACCATT	GABPB2,
chr15 : 75407055 - 75414311 : SIN3A,	0	7.08235	0	0	8.63188	3.4361	6.66805	0	0	0	0.858941	0.682912	0.999043	chr15	75407055	75414311	-	5	GTAG	AACAGAATCGTTATTTTTTGATAAG	CAAGATAAGATAGCGCATCCTCCAC	SIN3A,
chr4 : 48095143 - 48114402 : TXK,	0	0	0	4.60326	0	2.74888	0	0	0	0	-1.27684	0.683034	0.999043	chr4	48095143	48114402	-	5	GTAG	TTTCCGTATTTATGGGAGCTAGAAG	CAGAAAACCGACTGGATGGTGTTAT	TXK,
chr2 : 147899898 - 147896301 : ACVR2A,	0	7.08235	0	0	0	0	0	4.3954	0	0	-1.25333	0.683274	0.999043	chr2	147899898	147896301	+	6	GTAG	CCCTCCTGTACTTGTTCCAACTCAA	GTTTCTGATCTACCAAGTATAGCAC	ACVR2A,
chr10 : 89762835 - 89751346 : KIF20B,	0	0	4.53172	0	7.06245	6.87219	0	0	0	0	1.04365	0.684552	0.999043	chr10	89762835	89751346	+	6	GTAG	GAGGAAGAGTAATGAAATGGAGGAG	ATTATTTTCTCTTTAACATTTAGAT	KIF20B,
chr4 : 2690970 - 2657803 : FAM193A,	0	9.91528	0	0	0	0	6.66805	0	0	0	-1.17229	0.686091	0.999043	chr4	2690970	2657803	+	6	GTAG	TCATCCAAGAGACCTCCTTCAGTAG	TGCGCTGCTTGGTTTTCATTGTCAT	FAM193A,
chr12 : 28391411 - 28305649 : CCDC91,	13.5621	0	0	7.6721	0	5.49776	0	11.428	0	3.7624	-0.613127	0.687062	0.999043	chr12	28391411	28305649	+	6	GTAG	GTGTGAGGAGTTGCTAAATGCTCAG	GATGGTGAAAGATGGACTCCAGATA	CCDC91,
chr5 : 50797233 - 50788523 : PARP8,	0	5.66588	0	0	0	0	0	3.51632	0	0	-1.2488	0.687349	0.999043	chr5	50797233	50788523	+	6	GTAG	GTTTCAAAATGGCCCTATGCTTAGG	ATCTGAAAGACATCAACAGTGGGCA	PARP8,
chr1 : 23050520 - 23030469 : KDM1A,	0	0	3.39879	5.37047	0	6.18498	0	0	0	0	-1.07743	0.688012	0.999043	chr1	23050520	23030469	+	6	GTAG	TTTTCTTTTCATTAGAAACCGCACA	TTTCATCCATCTCTCTGTACTCTAC	KDM1A,
chr2 : 231460761 - 231463218 : NCL,	0	0	0	9.20653	3.13886	8.24663	4.44537	5.27448	0	1.50496	0.63935	0.688219	0.999043	chr2	231460761	231463218	-	0	GGGA	TGGCTGAGGATGAAGATGAAGAAGA	AATTACCTCTTCTCCACTGCTATCA	NCL,
chr17 : 67964404 - 67945409 : BPTF,	8.13729	5.66588	0	5.37047	6.27773	6.18498	13.3361	2.63724	5.48018	3.00992	0.358708	0.688734	0.999043	chr17	67964404	67945409	+	6	GTAG	GAAGAGGGTGCTCCGTTCCTTACAG	TTACTCTGCCTTTGTTCACCTGTAC	BPTF,
chr14 : 49799475 - 49831361 : NEMF,	4.06864	0	0	4.60326	6.27773	4.81054	6.66805	0	0	3.00992	0.651687	0.689648	0.999043	chr14	49799475	49831361	-	5	GTAG	GACATTTGTCAGCCAAGGAAAGAAG	TCTTGGAATAAAATTCATCCACCGC	NEMF,
chr7 : 50327757 - 50319048 : IKZF1,	4.06864	5.66588	7.93052	0	10.2013	10.3083	5.55671	5.27448	3.28811	0	0.421274	0.690988	0.999043	chr7	50327757	50319048	+	6	GTAG	AGCTCCAAGAGTGACAGAGTCGTGG	TCAGCATCCATGGTCCTCAGGTTAT	IKZF1,
chr6 : 13639563 - 13644729 : RANBP9,	2.71243	4.24941	0	3.06884	5.49301	2.74888	0	0	0	0	-0.83922	0.692292	0.999043	chr6	13639563	13644729	-	5	GTAG	AAAGGAAGCACCGCACATTTTTCAG	GCCCCACAGTAGGATACAAATTTGG	RANBP9,
chr7 : 138538803 - 138504290 : TRIM24,	0	0	0	5.37047	0	3.4361	0	0	0	0	-1.22612	0.692757	0.999043	chr7	138538803	138504290	+	6	GTAG	AGCATTACTTTATAGCAAACGACTG	CAAACTGGGCAACGAATGACTCCAA	TRIM24,
chr1 : 15938006 - 15937163 : SPEN,	0	8.49881	5.66465	0	0	7.55941	0	1.75816	0	3.00992	-0.74607	0.693116	0.999043	chr1	15938006	15937163	+	6	GTAG	GGAAGGGGTTGCCCGAAGGATGACG	GGGGCTCACCTTCAGGAGGAGGGCC	SPEN,
chr6 : 82214227 - 82214829 : IBTK,	6.78107	11.3318	12.4622	9.97374	7.06245	2.06166	14.4474	9.66988	13.1524	6.77232	-0.229366	0.693625	0.999043	chr6	82214227	82214829	-	5	GTAG	TCGACTTCAGTAATTTGAGTAGTAG	GGACACAGCTGGAATTTCATAAAGG	IBTK,
chr11 : 9989497 - 10002689 : SBF2,	5.42486	0	0	0	0	0	0	3.51632	0	0	-1.19106	0.701352	0.999043	chr11	9989497	10002689	-	5	GTAG	ACTTGCTGAGCAACTATTCAAAAAT	AAGAGGCTGAGGACATTTTGAATTC	SBF2,
chr5 : 109716264 - 109713520 : MAN2A1,	0	0	0	4.60326	0	0	0	0	0	3.00992	-1.18885	0.703485	0.999043	chr5	109716264	109713520	+	6	GTAG	GTGCCTCATTCCCATAACGACCCAG	TTTCTTGCAACATTGAGAGCTGGCC	MAN2A1,
chr12 : 29339851 - 29341816 : ERGIC2,	4.06864	0	4.53172	6.13768	0	0	5.55671	0	0	8.27728	-0.690939	0.704838	0.999043	chr12	29339851	29341816	-	5	GTAG	AGGAAATGGGGAAACAAAATTCCAG	AATTTTCCAATTCCATGTAACATGC	ERGIC2,
chr6 : 18236452 - 18258405 : DEK,	0	0	5.66465	0	10.2013	2.06166	0	0	0	3.00992	0.853221	0.705621	0.999043	chr6	18236452	18258405	-	5	GTAG	CACAATGAAACAGATTTGCAAAAAG	TTGCCTTCCACGATGAGACTCTTTT	DEK,
chr20 : 41512846 - 41533570 : CHD6,	4.06864	5.66588	0	0	3.92358	0	0	0	0	3.7624	-0.885439	0.708702	0.999043	chr20	41512846	41533570	-	5	GTAG	CTCTACACTGGCCTGGCAGGCGGAG	GATTCAAAACTTTTAAATTTGACAA	CHD6,
chr15 : 50300789 - 50304133 : GABPB1,	0	4.24941	0	0	2.35415	4.81054	4.44537	0	0	0	0.916046	0.70938	0.999043	chr15	50300789	50304133	-	5	GTAG	TTGTCCAATTCTTCAGAAACTCCAG	CTAGATGAAGTGGAGAAGTTCCCAG	GABPB1,
chr8 : 130118161 - 130126089 : ASAP1,	4.06864	0	0	0	0	0	5.55671	0	6.57621	0	1.00384	0.709741	0.999043	chr8	130118161	130126089	-	5	GTAG	TGGTTGACTTCCTTGTACAAAACTG	AAGTTGGTTGAAAGCCAGGTGGGTT	ASAP1,
chr15 : 32964107 - 32969477 : FMN1,	0	11.3318	0	0	0	0	0	0	0	8.27728	-1.00804	0.714653	0.999043	chr15	32964107	32969477	-	5	GTAG	TGAGAAGAAAAACAAGGTCAAAAAG	GAAATGCCCGAAGTTCAAACTGTGC	FMN1,
chr2 : 229858772 - 229860531 : TRIP12,	6.78107	0	13.5952	4.60326	2.35415	14.4316	6.66805	4.3954	0	0	-0.422298	0.715663	0.999043	chr2	229858772	229860531	-	5	GTAG	TCTGGATTACAGGCCAAATTAGCAA	ATGTTTTGCCTGCCCTAAATGTGAC	TRIP12,
chr3 : 16302748 - 16301626 : OXNAD1,	5.42486	0	0	0	0	11.6827	0	0	3.28811	0	0.916292	0.715721	0.999043	chr3	16302748	16301626	+	6	GTAG	GCGGAACTCAAGCCATACATCACGG	CAGCCACTTCACAGTCAAGTGTACA	OXNAD1,
chr12 : 120782655 - 120784593 : SPPL3,	0	0	0	3.83605	0	0	6.66805	0	0	5.26736	0.979328	0.715723	0.999043	chr12	120782655	120784593	-	5	GTAG	ACTGGCCATTGGCTTCTCATGGATG	TGGGTAGAGTCAATTGTTTGGATGC	SPPL3,
chr13 : 28261458 - 28256292 : PAN3,	0	11.3318	0	0	3.13886	2.74888	0	3.51632	0	0	-0.81729	0.715861	0.999043	chr13	28261458	28256292	+	6	GTAG	CAAATTGATCAAGCAGATATGCCAG	GAAGACCCAGCAGACAACGACATTC	PAN3,
chr4 : 38103157 - 38089932 : TBC1D1,	6.78107	5.66588	0	4.60326	3.13886	4.12332	0	0	0	9.78224	-0.553232	0.71599	0.999043	chr4	38103157	38089932	+	6	GTAG	CAGCATGCGATTCTTATTGACCTTG	GGAAGCTCTCCCAGCTCTGAATAAT	TBC1D1,
chr1 : 171575128 - 171568247 : PRRC2C,	0	5.66588	0	0	0	0	0	0	0	3.7624	-1.12582	0.716138	0.999043	chr1	171575128	171568247	+	6	GTAG	GTCACTCCTACAGCATCACTATCAG	GTGTAGTATAGTCTGTTACAGACTC	PRRC2C,
chr1 : 179343635 - 179335506 : SOAT1,	0	5.66588	0	0	0	0	0	0	0	3.7624	-1.12582	0.716138	0.999043	chr1	179343635	179335506	+	6	GTAG	TTATGTCGCTATGAAGTTTGCACAG	CCTTCATAAAAAATGGCTTCAATTC	SOAT1,
chr1 : 52509596 - 52526373 : ZCCHC11,	4.06864	0	0	0	4.7083	0	3.33402	0	0	3.00992	0.896135	0.718784	0.999043	chr1	52509596	52526373	-	5	GTAG	GAAACGACATAAGAAAAATATTTTG	TTCAAGTCCAGTTTAGGCAAGCAAA	ZCCHC11,
chr11 : 77675036 - 77693611 : RSF1,	2.71243	7.08235	9.06345	7.6721	8.63188	7.55941	5.55671	4.3954	0	6.01984	-0.298967	0.720213	0.999043	chr11	77675036	77693611	-	5	GTAG	TCTGAGGAGAATAGTAGAGACTCTG	TATCGCAAGAGTCACACAGAAGAAT	RSF1,
chr15 : 75409836 - 75413045 : SIN3A,	13.5621	4.24941	0	0	5.49301	3.4361	0	4.3954	0	4.51488	-0.538014	0.720833	0.999043	chr15	75409836	75413045	-	5	GTAG	TACAGGAACCACCCCTCCAGTTAAG	ACTAATCACTCCTGGGGTGTCGATG	SIN3A,
chr9 : 83780382 - 83806560 : GKAP1,	0	0	0	7.6721	3.13886	2.74888	0	0	0	0	-0.977698	0.72211	0.999043	chr9	83780382	83806560	-	5	GTAG	AGATCACATTAGTAAAAAGACTGAG	AAAATACTTCTGTCAAGAATAATTT	GKAP1,
chr9 : 33941649 - 33948587 : UBAP2,	8.13729	0	0	2.30163	0	0	4.44537	0	0	4.51488	-0.806992	0.724495	0.999043	chr9	33941649	33948587	-	5	GTAG	AGAGTCAGCTCCAGGAACCATCATG	CAAATCCTGAGCCAAGGACGGATGA	UBAP2,
chr2 : 230450255 - 230442937 : SP100,	0	0	0	7.6721	3.92358	2.06166	0	0	0	0	-0.956268	0.727828	0.999043	chr2	230450255	230442937	+	6	GTAG	TGCCCGTTGCCCTGTGATGAAGAAA	TACACCCTGGTCTTCCGTGAACATC	SP100,
chr3 : 119843255 - 119863605 : GSK3B,	0	0	4.53172	0	3.13886	0	0	0	0	0	-1.08421	0.728675	0.999043	chr3	119843255	119863605	-	5	GTAG	CCCACAAATGCCACAGCAGCGTCAG	CCGGTGGAGTTCGGGGTCGGAAGAC	GSK3B,
chr15 : 80122800 - 80120328 : ZFAND6,	0	14.1647	5.66465	12.2754	0	6.18498	12.2248	6.15356	10.9604	4.51488	-0.297755	0.730081	0.999043	chr15	80122800	80120328	+	6	GTAG	GTACCTGAAACAGAAGATGTGCAGG	TGAGCCATGTTCCTCAGTTGCACAC	ZFAND6,
chr3 : 47056821 - 47067118 : SETD2,	0	4.24941	0	0	4.7083	0	0	7.03264	0	0	0.926036	0.730697	0.999043	chr3	47056821	47067118	-	5	GTAG	ACAGACAACTCCACCAATTGTACAG	TTTTCTTTGGAATTCGATATACCTC	SETD2,
chr2 : 231460828 - 231461845 : NCL,	0	8.49881	5.66465	6.13768	7.06245	2.74888	5.55671	0	7.67225	0	-0.422006	0.731913	0.999043	chr2	231460828	231461845	-	0	GAAG	GCTATGGAGACTACACCAGCCAAAG	CCCTTCTTGCCAGGTGTGGTAACTG	NCL,
chr7 : 92327900 - 92294889 : ANKIB1,	6.78107	0	6.79759	15.3442	10.2013	4.81054	4.44537	7.03264	5.48018	5.26736	-0.264598	0.734727	0.999043	chr7	92327900	92294889	+	6	GTAG	GCTGAAGCTTTACTTCGAGCTCATG	ACACTTCTGCAACATCTTTCACATT	ANKIB1,
chr17 : 20205912 - 20204333 : SPECC1,	10.8497	11.3318	22.6586	0.76721	10.2013	2.74888	23.3382	0	10.9604	6.77232	-0.344408	0.735594	0.999043	chr17	20205912	20204333	+	6	GTAG	ACATGTTTCCAGTCTGCTGGCCAAG	GTCCGTTTAGTTGTTGTAAAGGCCC	SPECC1,
chr2 : 135772547 - 135769769 : UBXN4,	6.78107	0	0	3.06884	0	2.06166	6.66805	0	0	0	-0.778647	0.737297	0.999043	chr2	135772547	135769769	+	6	GTAG	GGGAATCTTATGCAAGAGAAAGAAG	CCTTTCTTCAAGTTTTTTTGTTAGT	UBXN4,
chr1 : 89714851 - 89686470 : LRRC8C,	10.8497	4.24941	0	3.83605	9.41659	2.06166	0	9.66988	0	15.0496	0.381133	0.739566	0.999043	chr1	89714851	89686470	+	6	GTAG	TTTCTTTCCTACTTAGATGTAAAAG	GAATTCTGTCACGGGAATCATGTTT	LRRC8C,
chr12 : 28391411 - 28255581 : CCDC91,	0	5.66588	0	0	2.35415	0	5.55671	6.15356	0	0	0.76097	0.741911	0.999043	chr12	28391411	28255581	+	6	GTAG	GTGTGAGGAGTTGCTAAATGCTCAG	TAAGCAGGTCATCCACGTATAGCAC	CCDC91,
chr18 : 9221999 - 9182382 : ANKRD12,	410.933	308.79	330.816	228.629	355.476	316.808	382.301	355.148	180.846	436.439	0.0826399	0.742267	0.999043	chr18	9221999	9182382	+	6	GTAG	TCTGATGATGATGAAAGTTACACAG	TTTTATCAGTCTTCTCATCCTGGAT	ANKRD12,
chr10 : 45639816 - 45653059 : ZFAND4,	0	0	0	6.90489	0	0	0	5.27448	0	0	-1.00389	0.742863	0.999043	chr10	45639816	45653059	-	5	GTAG	GAAGAACATGAATCTCAGCAAAAAG	AAGTGTTGTCGACAGATGGGAATAC	ZFAND4,
chr1 : 235213769 - 235221662 : ARID4B,	0	0	3.39879	0	5.49301	4.12332	0	0	0	0	0.925113	0.743219	0.999043	chr1	235213769	235221662	-	5	GTAG	TGCATTACTGCGGATGGAATGTGAG	GTTTCCAAACAGCTCCACTTTCAAT	ARID4B,
chr8 : 37877109 - 37877551 : RAB11FIP1,	4.06864	0	0	0	0	0	0	3.51632	7.67225	0	0.892303	0.744274	0.999043	chr8	37877109	37877551	-	5	GTAG	GATGAGTCCTCCTCGGCCTCGGATG	TGGTTTGGATTTCAACTTATACCAC	RAB11FIP1,
chr5 : 56111118 - 56116782 : ANKRD55,	0	0	3.39879	0	0	0	4.44537	0	0	5.26736	0.921884	0.74471	0.999043	chr5	56111118	56116782	-	5	GTAG	CGCCATCTACATAATCCATCATCAG	AGCTGCAGCCCAGTGCAGAGGTGTC	ANKRD55,
chr6 : 24836563 - 24838517 : FAM65B,	0	8.49881	0	0	0	0	0	0	6.57621	0	-0.965287	0.745904	0.999043	chr6	24836563	24838517	-	0	TGAT	TAATCATGTGAAACAAGACCACTAT	TATAAGACACATGTGAGGGCTGGGC	FAM65B,
chr7 : 158876691 - 158869855 : WDR60,	27.1243	31.1623	19.2598	37.5933	19.6179	14.4316	73.3485	40.4377	44.9375	6.77232	0.19455	0.746839	0.999043	chr7	158876691	158869855	+	6	GTAG	AGAAAGAAGATACCGAGAAAGAAAG	TCCAGGTATCATCTTTGGTTCTTCT	WDR60,
chr9 : 107311737 - 107300141 : RAD23B,	0	0	6.79759	2.30163	6.27773	6.18498	4.44537	0	0	3.00992	0.530443	0.747201	0.999043	chr9	107311737	107300141	+	6	GTAG	TTTGAAGATGCAACGAGTGCACTTG	CAATCTTCTCTTTCAGTGCTTTCAC	RAD23B,
chr9 : 33960826 - 33989126 : UBAP2,	0	0	7.93052	0	0	0	0	0	0	6.01984	-0.967494	0.748846	0.999043	chr9	33960826	33989126	-	5	GTAG	GACAACAGAAGACTGGACTGAAGAT	TACACCCTACAGTCTCCCATGAAGT	UBAP2,
chr4 : 185188951 - 185191212 : CFAP97,	0	0	0	3.06884	0	5.49776	0	3.51632	0	0	0.909255	0.751267	0.999043	chr4	185188951	185191212	-	5	GTAG	GCACGCCACTGCATCTGGCCCTTTT	CTGATCCATGATGGCAAAAATATAT	CFAP97,
chr5 : 36976402 - 36953618 : NIPBL,	8.13729	4.24941	6.79759	14.577	13.3402	10.3083	6.66805	7.03264	10.9604	10.5347	0.17632	0.752148	0.999043	chr5	36976402	36953618	+	6	GTAG	TTCTCAAAAGAAGTTCAAGATAAAG	GTCATTACTTCCCATTTCCCAAACA	NIPBL,
chr9 : 83678441 - 83686155 : UBQLN1,	9.4935	7.08235	7.93052	7.6721	7.84716	3.4361	6.66805	3.51632	6.57621	13.5446	-0.208855	0.752281	0.999043	chr9	83678441	83686155	-	5	GTAG	AATGCTGAGTGCTGCACAAGAGCAG	AACGTTTAGAGATTTCTTCCTTAAA	UBQLN1,
chr5 : 127524920 - 127523460 : PRRC1,	4.06864	0	4.53172	0	4.7083	2.74888	0	0	0	0	-0.760579	0.75234	0.999043	chr5	127524920	127523460	+	6	GTAG	TCATTTTCTGCACCTTCAGGAACAG	ATCATTTTTCTTCAATTATGGTATA	PRRC1,
chr6 : 149379518 - 149378018 : TAB2,	4.06864	0	7.93052	5.37047	3.92358	8.24663	0	2.63724	9.86432	8.27728	0.321684	0.75474	0.999043	chr6	149379518	149378018	+	6	GTAG	TCTGATGATGCTGCCTACACACAAG	AGCAGGCATCCAGGTTATTATTATT	TAB2,
chr9 : 33941649 - 33953474 : UBAP2,	0	8.49881	3.39879	0	0	5.49776	5.55671	0	0	0	-0.677648	0.755757	0.999043	chr9	33941649	33953474	-	5	GTAG	AGAGTCAGCTCCAGGAACCATCATG	CTGGAGCAAGGCTACCAGATCAATG	UBAP2,
chr1 : 92345914 - 92320599 : RPAP2,	0	0	0	7.6721	0	3.4361	0	0	0	3.00992	-0.845766	0.756023	0.999043	chr1	92345914	92320599	+	6	GTAG	TAATTGCTATGGTGTTGCTGTCATT	CTTTAGCAGTTGAAAATCAGGATGC	RPAP2,
chr15 : 75407055 - 75413045 : SIN3A,	0	0	5.66465	2.30163	7.06245	3.4361	7.77939	0	0	0	0.587736	0.756516	0.999043	chr15	75407055	75413045	-	5	GTAG	AACAGAATCGTTATTTTTTGATAAG	ACTAATCACTCCTGGGGTGTCGATG	SIN3A,
chr15 : 43349045 - 43335696 : ADAL,	0	0	0	2.30163	0	4.12332	0	0	0	3.00992	0.930068	0.757118	0.999043	chr15	43349045	43335696	+	6	GTAG	GTGAGGCAACATCGGATACCACTGG	ATCCATTCAAGTGGGCATGAAGTTC	ADAL,
chrX : 118398470 - 118387340 : WDR44,	0	0	0	3.83605	0	0	0	5.27448	0	5.26736	0.815439	0.766353	0.999043	chrX	118398470	118387340	+	6	GTAG	ATGGTGGAAGGTTAAAACAGAAAAC	CTTTGTATGCAGTGTTCTCTGTTTC	WDR44,
chr11 : 34092056 - 34090179 : CAPRIN1,	0	0	5.66465	0	3.13886	10.9955	0	0	0	0	0.74532	0.767443	0.999043	chr11	34092056	34090179	+	6	GTAG	CTTCAGCAAGAACAGCTTCAAACAG	CACTTGTGGATGATACCAAAGGAAC	CAPRIN1,
chr1 : 175159602 - 175160008 : KIAA0040,	0	0	0	5.37047	0	0	0	4.3954	0	0	-0.912303	0.767578	0.999043	chr1	175159602	175160008	-	0	TGCC	GAAGTGATGTCATAAGGTTGTGATG	ATCACACTTTAAACATCTTGGCACA	KIAA0040,
chr9 : 33971651 - 34017189 : UBAP2,	10.8497	0	0	3.06884	0	8.24663	0	0	5.48018	0	-0.595179	0.770023	0.999043	chr9	33971651	34017189	-	5	GTAG	CAGAATGGTGCAGATGAGGGAACTG	ATAATGTATGTACAAAATAGAAAAT	UBAP2,
chr5 : 65572286 - 65567513 : PPWD1,	4.06864	8.49881	0	0	0	2.74888	5.55671	0	4.38414	0	-0.566193	0.7701	0.999043	chr5	65572286	65567513	+	6	GTAG	GAGAGTCTTTGATGAATCACTAAGC	AGATAGACTCTTTCAAACTCTAAGA	PPWD1,
chr1 : 35014697 - 35019602 : ZMYM6,RP11-244H3.4,	0	5.66588	0	2.30163	10.2013	0	0	7.91172	0	0	0.613586	0.770431	0.999043	chr1	35014697	35019602	-	5	GTAG	AACAAGTGTCACGGCATACAAGCAG	TGAAAGCCTGGGTTCAACTGCTGGG	ZMYM6,RP11-244H3.4,
chr4 : 87047594 - 87046166 : AFF1,	12.2059	19.8306	16.994	11.5082	10.986	20.6166	13.3361	10.549	27.4009	15.0496	0.118974	0.770462	0.999043	chr4	87047594	87046166	+	6	GTAG	GAAGATGCCTTCTCAGTCAGTTGAG	CAGGTTTCTGTCGTCATTGTACAAA	AFF1,
chr1 : 205618957 - 205620838 : ELK4,	4.06864	11.3318	0	8.43932	3.13886	6.87219	17.7815	6.15356	9.86432	0	0.273261	0.770706	0.999043	chr1	205618957	205620838	-	5	GTAG	GCAAGGTGCTAACACACTTTTCCAG	GACCATTCACTTTTTTGATGATATT	ELK4,
chr7 : 27800090 - 27785163 : TAX1BP1,	0	0	0	6.90489	3.13886	3.4361	3.33402	2.63724	3.28811	0	0.527001	0.771502	0.999043	chr7	27800090	27785163	+	6	GTAG	AGCTGAAGTACAGGACAATTATAAA	AGCTTTGTGTTACTTCAGTAAGACC	TAX1BP1,
chr5 : 79439010 - 79457018 : HOMER1,	0	0	5.66465	0	0	0	0	0	0	4.51488	-0.893078	0.771998	0.999043	chr5	79439010	79457018	-	5	GTAG	AGAATGCATTGCCATTTTCACATAG	TCGAGTGCTGAAGATAGGTTGTTCC	HOMER1,
chr13 : 77278758 - 77296674 : MYCBP2,	0	0	0	4.60326	0	0	0	0	0	3.7624	-0.894634	0.773478	0.999043	chr13	77278758	77296674	-	5	GTAG	CAGTCTGAGCCACCTGAGGTCCTAG	CTTCTTATTTAAAATTTTCTTATTC	MYCBP2,
chr18 : 76871825 - 76849526 : ZNF236,	0	4.24941	0	0	0	2.74888	0	7.91172	0	0	0.786735	0.774075	0.999043	chr18	76871825	76849526	+	6	GTAG	ACGCGACACATTAGGATACACACAG	TCCGCATTCAATGTTAAAACTCCAT	ZNF236,
chr15 : 51902036 - 51869217 : TMOD3,	0	0	0	3.83605	0	0	0	3.51632	0	6.77232	0.783087	0.776598	0.999043	chr15	51902036	51869217	+	6	GTAG	GCTATAACAAAAAACAATGACTTAG	GGAACCCTGCAGGCAGAAGGGCATT	TMOD3,
chr11 : 76546297 - 76542216 : EMSY,	5.42486	0	0	2.30163	0	5.49776	0	7.03264	4.38414	0	0.548805	0.777705	0.999043	chr11	76546297	76542216	+	6	GTAG	GAGTCCAGCAGAAATTATCATCCAG	TGTTGGGGCTGGGAGCGATGGCTGA	EMSY,
chr7 : 26192495 - 26197732 : HNRNPA2B1,	0	0	2.26586	0	0	0	0	3.51632	0	3.00992	0.859963	0.777933	0.999043	chr7	26192495	26197732	-	5	GTAG	CTGAGCTTCTTCCTATTTGCCATGG	GCTTACGGAACTGTTCCTTTTCTCT	HNRNPA2B1,
chr2 : 231460689 - 231461685 : NCL,	5.42486	0	0	0	0	0	0	4.3954	0	0	-0.869093	0.778442	0.999043	chr2	231460689	231461685	-	0	GGGA	ATGATGATGAAGATGATGAGGAGGA	ATCCTCGTCCTCGTCATCCTCCTCA	NCL,
chr6 : 63700466 - 63694581 : PHF3,	6.78107	0	0	0	5.49301	0	0	0	0	0	-0.859542	0.778802	0.999043	chr6	63700466	63694581	+	6	GTAG	TTGGAGACGAAGAGAAAACAGACAT	ATGAATTTCTGCCTTCACCAGACTC	PHF3,
chr12 : 12500519 - 12521463 : DUSP16,	0	0	0	7.6721	3.13886	0	0	0	0	3.7624	-0.756105	0.779869	0.999043	chr12	12500519	12521463	-	5	GTAG	CTGCCAGCGAGATGTCCTCAACAAG	AACAGCTTTACACTGGACTGAAAGC	DUSP16,
chr13 : 26401624 - 26400453 : CDK8,	0	0	0	5.37047	0	4.81054	0	8.7908	0	0	0.707304	0.780292	0.999043	chr13	26401624	26400453	+	6	GTAG	ACTTATCATGACCTCAGACTATCAG	GGTCCATGGTAAGCAGCTTCTGAAG	CDK8,
chr1 : 150226608 - 150229237 : ANP32E,	0	0	3.39879	0	0	3.4361	0	0	5.48018	0	0.796069	0.781397	0.999043	chr1	150226608	150229237	-	5	GTAG	ATACTTAATGAAAGAAGAAATTCAG	GACTTTTCAAATTTTTAAGATTTTG	ANP32E,
chr5 : 142932125 - 142885298 : ARHGAP26,	6.78107	0	0	0	0	5.49776	0	0	0	0	-0.844472	0.782543	0.999043	chr5	142932125	142885298	+	6	GTAG	GGAAGCCATGGATGGCCGGGAACCT	CTTTGTCATACTTCTTTTTGGCTTC	ARHGAP26,
chr7 : 92003235 - 91992158 : AKAP9,	0	0	4.53172	0	0	0	0	0	12.0564	0	0.807049	0.783586	0.999043	chr7	92003235	91992158	+	6	GTAG	ACTCAATGTACTTAAATCAGAACAG	TCATCACAAAACTGCAACCATTTAC	AKAP9,
chr2 : 37316237 - 37317179 : PRKD3,	5.42486	5.66588	5.66465	4.60326	0	3.4361	0	2.63724	10.9604	9.02976	-0.297921	0.784034	0.999043	chr2	37316237	37317179	-	5	GTAG	TGTGTGCTCCATAGTTTATCAAAAG	TGATGCTTTCTGACATATAGTTAGC	PRKD3,
chr5 : 66014725 - 65988635 : ERBIN,	0	0	5.66465	0	7.84716	2.06166	3.33402	0	0	0	0.639342	0.784172	0.999043	chr5	66014725	65988635	+	6	GTAG	AAAACCAGTTAAAAATGTTGCCTAA	GATGTTTCTTAATTGAGCCAACATT	ERBIN,
chr9 : 98011284 - 98015427 : ANP32B,	6.78107	0	0	0	0	6.87219	0	4.3954	0	3.7624	0.605334	0.784381	0.999043	chr9	98011284	98015427	-	0	TCAA	ACCATCCTCATCGTCCTCGTCTTCC	AAACAGATGATGAAGGAGAAGATGA	ANP32B,
chr1 : 15536814 - 15534237 : DNAJC16,	0	0	0	3.06884	0	0	0	0	8.76828	0	0.846419	0.785133	0.999043	chr1	15536814	15534237	+	6	GTAG	GTCATTCAAGAACTGGAAGAATTGG	AGGATCTTTGTTTTTGTCAGGATGC	DNAJC16,
chr16 : 68126610 - 68121987 : NFATC3,	24.4119	12.7482	27.1903	16.1114	18.0485	15.806	28.8949	19.3398	28.4969	19.5645	0.0935987	0.786059	0.999043	chr16	68126610	68121987	+	6	GTAG	TACTGGGGGACATCCTGTTGTGAAG	GATGCACAATCATCTGGCTCAAGAT	NFATC3,
chr2 : 207976651 - 207977586 : PLEKHM3,	4.06864	0	0	3.06884	0	0	0	3.51632	3.28811	0	-0.67896	0.786538	0.999043	chr2	207976651	207977586	-	5	GTAG	ACTGCTCAGAGTTTCAAATGTGCAG	ATGTTTGGGAATGTCTGCTTGTGTT	PLEKHM3,
chr17 : 37576341 - 37585430 : SYNRG,	0	0	0	4.60326	6.27773	0	5.55671	0	0	0	0.71413	0.787824	0.999043	chr17	37576341	37585430	-	5	GTAG	ATTTACAATGAGAGTTTGGTTCCAG	TTTTTGCTGCTGTTCAAATCGTTTC	SYNRG,
chr1 : 205616478 - 205623891 : ELK4,	88.154	104.819	108.761	90.5308	107.506	96.2107	91.13	94.0615	154.541	70.7331	0.0578203	0.78888	0.999043	chr1	205616478	205623891	-	5	GTAG	GACATTCAACATGATTGCATTTGAA	TGATAGCACTGTCCATAGCAATGAG	ELK4,
chr6 : 130955105 - 130956499 : EPB41L2,	9.4935	0	3.39879	6.90489	11.7707	8.24663	0	8.7908	7.67225	0	0.291222	0.789984	0.999043	chr6	130955105	130956499	-	5	GTAG	CACCGAATACAGCTGTGACCTGGAG	TCAGTAGTCATGGCCACAGCTTATG	EPB41L2,
chr12 : 103263326 - 103270308 : C12orf42,	0	9.91528	3.39879	3.83605	0	10.9955	3.33402	2.63724	6.57621	7.5248	0.290444	0.790579	0.999043	chr12	103263326	103270308	-	5	GTAG	TTGCTGCTCCTACCTCAAATAGAAG	GGCACAAAGGGAATGGAGAGCATTT	C12orf42,
chr5 : 139623461 - 139600372 : UBE2D2,	0	0	3.39879	6.13768	0	0	0	4.3954	10.9604	5.26736	0.476908	0.790677	0.999043	chr5	139623461	139600372	+	6	GTAG	GGATCTACAAAACAGATAGAGAAAA	GGTCCCGTGCCAGATCATTCAATTC	UBE2D2,
chr4 : 36228582 - 36229645 : ARAP2,	4.06864	0	0	3.83605	2.35415	0	0	1.75816	0	3.7624	-0.585789	0.790922	0.999043	chr4	36228582	36229645	-	5	GTAG	GGTCAACAAAAGGAGTTTCTGGGAG	CAGTGACTGCTTTACCTGCTTAAGC	ARAP2,
chr3 : 71041328 - 71053773 : FOXP1,	12.2059	7.08235	0	13.8098	7.84716	22.6782	8.89073	7.91172	5.48018	3.7624	0.186768	0.791318	0.999043	chr3	71041328	71053773	-	5	GTAG	CAGTCCACACTCCCAAAAGGGAAAG	TCATCATAGCCACTGACACGGGAAC	FOXP1,
chr7 : 158891333 - 158869855 : WDR60,	5.42486	0	4.53172	0	0	0	16.6701	7.91172	0	0	0.71848	0.791428	0.999043	chr7	158891333	158869855	+	6	GTAG	GAGGCCGGGAGGCGAGGAAACCGTG	TCCAGGTATCATCTTTGGTTCTTCT	WDR60,
chr4 : 48383784 - 48377896 : SLAIN2,	0	5.66588	0	0	4.7083	0	0	0	0	0	-0.812083	0.792105	0.999043	chr4	48383784	48377896	+	6	GTAG	CGTATGCAACCTCAGGCTTCAGCCA	TTATATAAATTCTGCCTCTTGAGAG	SLAIN2,
chr15 : 93014909 - 93000512 : CHD2,	6.78107	0	13.5952	10.7409	9.41659	8.24663	7.77939	8.7908	4.38414	3.00992	-0.194271	0.792176	0.999043	chr15	93014909	93000512	+	6	GTAG	AACAAGAGACACTTCAGTAATGCAG	GAGGCTTCCGCTTCTTTAATTTGGC	CHD2,
chr5 : 177536358 - 177539147 : FAM193B,	5.42486	4.24941	0	0	0	4.12332	3.33402	0	0	2.25744	-0.546105	0.794734	0.999043	chr5	177536358	177539147	-	5	GTAG	CTCAGCCACTCCCTAGCACTCACAG	CAGGCTGGCTGGAGGCGGGGGGGAC	FAM193B,
chr9 : 20413721 - 20414425 : MLLT3,	0	5.66588	21.5257	9.20653	1.56943	12.37	8.89073	13.1862	9.86432	16.5546	0.174391	0.798468	0.999043	chr9	20413721	20414425	-	5	GTAG	GGAGAATATATCCTCTAAATCTGAT	TGGTATGAATACTCCTATTAGGGTC	MLLT3,
chr11 : 65502768 - 65503266 : AP000769.1,	0	7.08235	4.53172	0	4.7083	0	0	4.3954	0	3.00992	-0.496577	0.799269	0.999043	chr11	65502768	65503266	-	0	CCTA	TAAGAATCTCAGGGTTATGCTTATT	TTTTAAGAGCTGTGGAGTTCTTAAA	AP000769.1,
chr1 : 233198939 - 233218184 : PCNX2,	0	0	0	9.97374	0	0	12.2248	4.3954	0	5.26736	0.488387	0.799629	0.999043	chr1	233198939	233218184	-	5	GTAG	CGCAGTCTGCTTCAGTGCAGTGAAG	TACATTCTCCTTGATGTCTTCAGTT	PCNX2,
chr1 : 30992390 - 31007102 : PUM1,	0	7.08235	0	0	3.13886	0	3.33402	0	0	0	-0.701477	0.800985	0.999043	chr1	30992390	31007102	-	5	GTAG	TTTTGACTACAATTCTCAACAACAG	AAAACTTTTTACCTGGCAAGAGCTG	PUM1,
chr2 : 99195756 - 99186177 : RP11-111H13.1,MRPL30,	28.4805	26.9129	18.1269	28.3868	17.2638	31.6121	25.5608	11.428	31.785	44.3963	0.0875249	0.801309	0.999043	chr2	99195756	99186177	+	6	GTAG	TGCAAATTGTTTTTATTTAAAGATG	GTGTAGTGATTGCTCTCTTTAGAGG	RP11-111H13.1,MRPL30,
chr3 : 53290791 - 53292827 : DCP1A,	13.5621	4.24941	4.53172	14.577	13.3402	10.3083	5.55671	7.03264	8.76828	16.5546	0.140777	0.803508	0.999043	chr3	53290791	53292827	-	5	GTAG	TAAGGTGTTATCCAGTGCCATCCCG	GATGCTTGTGTCCAGATGGAGCAGA	DCP1A,
chr6 : 149683079 - 149695221 : LATS1,	6.78107	0	0	2.30163	8.63188	0	0	0	0	0	-0.642666	0.80415	0.999043	chr6	149683079	149695221	-	5	GTAG	ACAATTAGAGAATGAAATGATGCGG	TCTGAAGAGCTTGTATAACCATATC	LATS1,
chr5 : 98868495 - 98872555 : CHD1,	0	0	6.79759	4.60326	7.06245	4.81054	0	0	0	0	-0.524895	0.805908	0.999043	chr5	98868495	98872555	-	5	GTAG	GCTGGATCAGAAGACATTCAGCATT	CCCTTCACTTTTCCGAGTCTACCAC	CHD1,
chr2 : 231460749 - 231463239 : NCL,	0	0	0	3.83605	0	0	0	3.51632	0	0	-0.762339	0.807619	0.999043	chr2	231460749	231463239	-	0	CGGA	AAGATGAAGAAGAGGATGATGAGGA	ATCATCTTCTTCATCTTCTGACATT	NCL,
chr9 : 37219098 - 37126312 : ZCCHC7,	0	0	0	3.83605	0	3.4361	0	0	0	0	-0.754185	0.809609	0.999043	chr9	37219098	37126312	+	6	GTAG	AAAAAAGATTGGGATTCTGCTTAAG	TCATAAAAAGTCAGTAACCTTGAAG	ZCCHC7,
chr1 : 171532961 - 171523221 : PRRC2C,	21.6994	7.08235	3.39879	13.0426	14.1249	12.37	12.2248	14.0653	14.2485	6.77232	0.119725	0.811079	0.999043	chr1	171532961	171523221	+	6	GTAG	GAAAGTGAAAACAGCTGTAATAAAG	AGGTGGGCCTCTTCCTCGAAGGCCT	PRRC2C,
chr3 : 134552012 - 134545586 : CEP63,	0	0	0	4.60326	0	0	0	0	4.38414	0	-0.737973	0.811857	0.999043	chr3	134552012	134545586	+	6	GTAG	GAAATTGGAATTGGGTTTACATGAG	TCTGTTTCCGATTGACAAGCTGAGC	CEP63,
chr7 : 30550636 - 30562128 : AC005154.6,RP4-777O23.3,AC005154.6,	0	0	0	4.60326	0	0	0	0	4.38414	0	-0.737973	0.811857	0.999043	chr7	30550636	30562128	-	5	GTAG	CAGTAACCCTGTGTTCTATCCACAG	AGTGGAAAAGGGAATTTTAGGAAAA	AC005154.6,RP4-777O23.3,AC005154.6,
chr4 : 13576838 - 13587771 : BOD1L1,	0	4.24941	6.79759	0	3.92358	5.49776	0	12.3071	0	0	0.410797	0.813188	0.999043	chr4	13576838	13587771	-	5	GTAG	CCACCACCAGATCAGAGGCTCAGAG	GCATATGCCTTTCTTCCTCTTCAAC	BOD1L1,
chr9 : 33948374 - 33953474 : UBAP2,	0	7.08235	4.53172	7.6721	5.49301	5.49776	4.44537	4.3954	0	4.51488	-0.252795	0.813425	0.999043	chr9	33948374	33953474	-	5	GTAG	CAGTCCTCAGTCCTCAGTCATCTTG	CTGGAGCAAGGCTACCAGATCAATG	UBAP2,
chr9 : 131147584 - 131135940 : NUP214,	14.9184	0	4.53172	0	13.3402	0	0	0	0	5.26736	-0.638095	0.813896	0.999043	chr9	131147584	131135940	+	6	GTAG	AGCGGCAAAGCCAGGCTCTCCCCAG	CGCAGATGCTGCCAGCACTAAATCC	NUP214,
chr7 : 24668660 - 24623663 : MPP6,	0	0	6.79759	0	0	2.06166	0	4.3954	0	0	-0.652378	0.81489	0.999043	chr7	24668660	24623663	+	6	GTAG	ACTAGATTTGGAACTACGGTGCCAT	TTTTCCAAGACTTGCTGCATTGCTG	MPP6,
chr3 : 170171373 - 170178938 : PHC3,	2.71243	1.41647	0	4.60326	2.35415	5.49776	0	0	1.09604	0.75248	-0.425477	0.818769	0.999043	chr3	170171373	170178938	-	5	GTAG	GCAGTCAAGTATGTCCCAAACGTCT	CATAGCTGTACTATGGTCCTTAAAT	PHC3,
chr2 : 202955758 - 202952559 : CARF,	0	0	0	4.60326	3.92358	0	0	7.03264	0	0	0.612885	0.819567	0.999043	chr2	202955758	202952559	+	6	GTAG	GGCCTGCCGTCTTAGGAGCTGTGAG	TTTCTGTTGGGCTGGCAACGATCAT	CARF,
chr6 : 100798713 - 100848707 : ASCC3,	0	0	0	3.06884	0	2.74888	0	0	0	0	-0.710643	0.822384	0.999043	chr6	100798713	100848707	-	5	GTAG	AGTTTATATCCAAGACTTAGATGAG	GCTTCTCTCCCATTATCAGTTCCAA	ASCC3,
chr6 : 158725637 - 158707230 : SYTL3,	0	0	0	3.06884	0	2.74888	0	0	0	0	-0.710643	0.822384	0.999043	chr6	158725637	158707230	+	6	GTAG	CATATTCTCTGGAGGTTTTAGACAC	TGCCCTCCAACTGTCTCATGTTTGC	SYTL3,
chr8 : 38347497 - 38348215 : WHSC1L1,	12.2059	8.49881	9.06345	9.97374	3.13886	13.7444	6.66805	12.3071	18.6326	10.5347	0.120491	0.822559	0.999043	chr8	38347497	38348215	-	5	GTAG	CAAATTAGAACCAGAGGAACAAAAT	TAACTTTCCCTTTCTCTCATCGGGC	WHSC1L1,
chr1 : 117442325 - 117402186 : MAN1A2,	35.2616	24.08	35.1209	24.5507	35.3122	35.7354	51.1217	35.1632	0	42.1389	0.16289	0.822807	0.999043	chr1	117442325	117402186	+	6	GTAG	CTTGGGCAATGGTGAATTTGAAAAG	ATTTCTCAGACGTTCTTCCTCTTCC	MAN1A2,
chr2 : 195683906 - 195680032 : SLC39A10,	9.4935	4.24941	9.06345	1.53442	7.06245	6.18498	0	4.3954	3.28811	9.78224	-0.205152	0.822839	0.999043	chr2	195683906	195680032	+	6	GTAG	GATGAGGCAAATATAGGGGCATCAG	ATATGTACCTTCATTTCTATTTTTC	SLC39A10,
chr1 : 233177802 - 233208689 : PCNX2,	5.42486	4.24941	6.79759	0	4.7083	6.18498	0	0	7.67225	10.5347	0.268727	0.826193	0.999043	chr1	233177802	233208689	-	5	GTAG	CCCCAAGAAGATGAAAGATTCAGTG	TATATGTTATGATTTGGTTGTGTCC	PCNX2,
chr5 : 81127163 - 81092801 : RASGRF2,	0	0	5.66465	0	0	0	0	0	0	5.26736	-0.673485	0.826521	0.999043	chr5	81127163	81092801	+	6	GTAG	GCAGCAGGACATGGGAGTCCACCAG	ACGGAAGGTACTTGAATAAGAGAAC	RASGRF2,
chr1 : 145994969 - 145996173 : TXNIP,	8.13729	0	10.1964	2.30163	0	2.74888	0	7.03264	0	15.0496	-0.299703	0.826939	0.999043	chr1	145994969	145996173	-	0	TCTG	CATGTTCATTCCTGATGGGCGGGTG	GAGTAACTTCACACACCTCCACTAT	TXNIP,
chr11 : 108332037 - 108327645 : ATM,	4.06864	0	0	3.83605	3.92358	0	0	5.27448	0	6.77232	0.423727	0.827857	0.999043	chr11	108332037	108327645	+	6	GTAG	TAAACAAAGCTCTCAGCTTGATGAG	ATGTAAGTTTTAGGCTGGGATTGTT	ATM,
chr1 : 205771472 - 205773224 : RAB29,	8.13729	0	5.66465	0	5.49301	0	0	4.3954	16.4405	0	0.348295	0.828179	0.999043	chr1	205771472	205773224	-	5	GTAG	GCCCTGCCTGCTCTTGGCCAACAAG	GTATTCCATGGGGAAAGCCTTTTGG	RAB29,
chr17 : 37553115 - 37554059 : SYNRG,	0	0	4.53172	0	3.13886	0	0	7.03264	0	0	0.580705	0.832148	0.999043	chr17	37553115	37554059	-	5	GTAG	AGTGGCCAGCATCCTCCTGCTGCAG	GATCTGAATTCTGCAAAGCTTTCTC	SYNRG,
chr17 : 47379253 - 47361378 : EFCAB13,	0	5.66588	0	5.37047	3.92358	4.12332	4.44537	0	0	0	-0.411954	0.832391	0.999043	chr17	47379253	47361378	+	6	GTAG	GAGCGAAGTTTTCCTGAATGCAATG	AAAATCTTCAAGGCATCCTGGAATG	EFCAB13,
chr1 : 171532961 - 171527791 : PRRC2C,	0	0	4.53172	0	0	0	4.44537	0	0	0	-0.656556	0.832437	0.999043	chr1	171532961	171527791	+	6	GTAG	GAAAGTGAAAACAGCTGTAATAAAG	GCAGATGTGAAGATGTTCCACGTTC	PRRC2C,
chr13 : 27430621 - 27427092 : GTF3A,	0	0	4.53172	0	0	0	4.44537	0	0	0	-0.656556	0.832437	0.999043	chr13	27430621	27427092	+	6	GTAG	AGCATACCAATGAACCTCTATTCAA	CTTCATAGTCACAAACAAATGGTCT	GTF3A,
chr1 : 171561103 - 171550086 : PRRC2C,	0	5.66588	0	0	0	2.06166	0	0	4.38414	5.26736	0.503503	0.833604	0.999043	chr1	171561103	171550086	+	6	GTAG	GTTTGGATCAGCTCCTTCATCAGAG	GGATGATCATCAATTATAACAACAC	PRRC2C,
chr4 : 73078642 - 73092300 : ANKRD17,	0	0	4.53172	0	1.56943	2.74888	5.55671	0	0	0	0.527162	0.834051	0.999043	chr4	73078642	73092300	-	5	GTAG	TTTGAAGGGATTGGTGGCAATCAAG	TTGTCTTGTTGATTCAGTGCCACCC	ANKRD17,
chr10 : 15816835 - 15847943 : FAM188A,	8.13729	0	0	0	0	2.06166	0	2.63724	0	3.7624	-0.491582	0.837809	0.999043	chr10	15816835	15847943	-	5	GTAG	TCACCTCACCGTATTTTTTGCCAAG	CCCTCTGATTCACTAAACACAAACC	FAM188A,
chr14 : 73103255 - 73106036 : RBM25,	0	7.08235	0	8.43932	5.49301	7.55941	0	5.27448	0	0	-0.341381	0.838139	0.999043	chr14	73103255	73106036	-	0	TCTT	CCCTTTCACGCTCCCTCTCTCTTTC	TGAAGAAGATGCATACGAACGAAGA	RBM25,
chr16 : 57164001 - 57173869 : FAM192A,	0	11.3318	11.3293	0	10.2013	3.4361	0	4.3954	6.57621	3.7624	-0.236611	0.838141	0.999043	chr16	57164001	57173869	-	5	GTAG	CCTGAGCCAGATGACAAGAATCAAG	CTCCATCCATAATGAAACAACCAAT	FAM192A,
chr17 : 42727635 - 42730918 : EZH1,	0	7.08235	0	0	0	0	0	0	0	6.77232	-0.614629	0.839835	0.999043	chr17	42727635	42730918	-	5	GTAG	GAGTGGACACCCTTTTCTCAAAAAG	ACACAACAGCAGAACAGGTGTCCAG	EZH1,
chr15 : 64500166 - 64499293 : ZNF609,	23.0557	8.49881	7.93052	22.2491	19.6179	6.18498	22.2268	14.0653	10.9604	15.8021	-0.0877992	0.845846	0.999043	chr15	64500166	64499293	+	6	GTAG	GCTAAAGAAAGTCAAGTCTGAAAAG	ACATGCCCAGTGGACAACATCATTG	ZNF609,
chr11 : 77672042 - 77693611 : RSF1,	8.13729	0	3.39879	0	0	2.74888	0	6.15356	4.38414	0	-0.370449	0.848569	0.999043	chr11	77672042	77693611	-	5	GTAG	AGACTTTCCAGCTCAGAGAGTGAAG	TATCGCAAGAGTCACACAGAAGAAT	RSF1,
chr4 : 53428183 - 53399730 : FIP1L1,	13.5621	0	0	0	0	7.55941	5.55671	0	0	2.25744	-0.382254	0.849704	0.999043	chr4	53428183	53399730	+	6	GTAG	GCTCCACCTCTGATTCCACCACCGG	AGTTTCCAGTTCTTCCCTGCTGTAC	FIP1L1,
chr20 : 41533050 - 41551360 : CHD6,	18.987	9.91528	13.5952	6.90489	10.2013	7.55941	15.5588	20.2188	10.9604	4.51488	-0.0956749	0.850473	0.999043	chr20	41533050	41551360	-	5	GTAG	CCAGGACGAAGTCCAGGAAGGCCAG	ATCTATTGAAGGAAGATATTTATTT	CHD6,
chr5 : 50399107 - 50411383 : EMB,	6.78107	7.08235	6.79759	1.53442	4.7083	5.49776	0	6.15356	3.28811	16.5546	0.169745	0.85284	0.999043	chr5	50399107	50411383	-	5	GTAG	TCAACGATATATGTCAGATCTAAAG	TTTTCTACTGGCATACTAGAATGTT	EMB,
chr7 : 105142008 - 105146658 : SRPK2,	0	0	7.93052	0	0	4.81054	5.55671	0	5.48018	0	0.400325	0.852891	0.999043	chr7	105142008	105146658	-	5	GTAG	TCCAGTACTGGGGATTTGCCAAAAG	GTAAGTAATCTAACCCTTGAAGGAC	SRPK2,
chr11 : 108335961 - 108330214 : ATM,	5.42486	0	3.39879	3.83605	5.49301	5.49776	5.55671	2.63724	3.28811	0	0.227923	0.855109	0.999043	chr11	108335961	108330214	+	6	GTAG	GAAATTAACTATCTGTACTTATAAG	CTCTCGCTGAACCTTTACTGTGTAT	ATM,
chr3 : 136417885 - 136502779 : STAG1,	0	0	0	3.06884	7.06245	0	0	0	0	0	0.5654	0.855827	0.999043	chr3	136417885	136502779	-	5	GTAG	TGAACATGGAGCCATGCCAGAACAG	ACCAGAGCAGTCATGAGCTTCATGG	STAG1,
chr12 : 122377389 - 122380558 : CLIP1,	0	0	0	6.13768	0	0	0	0	6.57621	0	-0.545919	0.858245	0.999043	chr12	122377389	122380558	-	5	GTAG	GCTCAAAATCGGAGACAGAGTATTG	AGTGAAGTCAGTCTCTGGATTAAAT	CLIP1,
chr13 : 77753358 - 77719532 : SLAIN1,	10.8497	0	15.861	16.1114	14.1249	10.3083	12.2248	4.3954	16.4405	0	-0.17922	0.858954	0.999043	chr13	77753358	77719532	+	6	GTAG	GGAATTTCAAGAATACAATCTTGTA	CGTCTTTGAAGAGCCAATGTATAAC	SLAIN1,
chr12 : 28259442 - 28255581 : CCDC91,	9.4935	9.91528	0	0	5.49301	6.18498	10.0021	0	0	11.2872	0.219735	0.862689	0.999043	chr12	28259442	28255581	+	6	GTAG	ATTCCTTGGGCTGCCTTTCCTGCAG	TAAGCAGGTCATCCACGTATAGCAC	CCDC91,
chr9 : 5968019 - 5988545 : KIAA2026,	6.78107	12.7482	11.3293	9.20653	7.84716	5.49776	8.89073	11.428	14.2485	9.02976	-0.0903419	0.863349	0.999043	chr9	5968019	5988545	-	5	GTAG	GCAAAACACAAGAAGCACAAATCTG	TATCGTTGTCTTTTCTCTCAAGTGC	KIAA2026,
chr2 : 71418639 - 71396141 : ZNF638,	9.4935	4.24941	4.53172	3.83605	7.06245	0	4.44537	0	5.48018	12.0397	-0.1806	0.865426	0.999043	chr2	71418639	71396141	+	6	GTAG	ATGACCCAGAATTAGAAAAAGAAAG	GATGCCTTGGCTTGTCCAGTTTTGG	ZNF638,
chr17 : 67948306 - 67945409 : BPTF,	33.9054	12.7482	23.7915	26.8524	24.3262	19.9294	26.6722	23.7352	33.9771	14.2971	-0.0562047	0.865553	0.999043	chr17	67948306	67945409	+	6	GTAG	CAAGGATCTGCAAATTGAAGTGCAG	TTACTCTGCCTTTGTTCACCTGTAC	BPTF,
chr6 : 130154825 - 130184623 : SAMD3,	0	0	7.93052	1.53442	0	5.49776	0	0	5.48018	0	-0.381036	0.866348	0.999043	chr6	130154825	130184623	-	5	GTAG	TCCTTTCTTGAAGTGCCCTTATCAG	TGCTAGAATTTGTTTCACATTTCTT	SAMD3,
chr1 : 20757166 - 20773610 : HP1BP3,	4.06864	0	9.06345	0	4.7083	6.18498	0	0	5.48018	6.77232	0.248935	0.866794	0.999043	chr1	20757166	20773610	-	5	GTAG	CAAAGGTGCTTCGGGGACATTCCAG	CTTTTCTTTAGACTGATCTTTCTCA	HP1BP3,
chr1 : 203708104 - 203707009 : ATP2B4,	0	0	4.53172	0	4.7083	0	0	0	0	0	-0.517253	0.867351	0.999043	chr1	203708104	203707009	+	6	GTAG	CAGTGCTTATACCTCCAAGATTCTG	ACCGTGAGAGCAGACATGAGCAGAC	ATP2B4,
chr11 : 45965315 - 45979966 : PHF21A,	0	0	0	7.6721	1.56943	2.74888	5.55671	5.27448	0	0	0.330018	0.868459	0.999043	chr11	45965315	45979966	-	5	GTAG	TAGCAAGCCAAGTCTTGAAAAACAG	TCCGTAGCTGTTCAACTACTCTTTT	PHF21A,
chr1 : 243637611 - 243843282 : AKT3,	5.42486	0	0	3.83605	2.35415	0	0	0	0	8.27728	-0.375121	0.868992	0.999043	chr1	243637611	243843282	-	5	GTAG	GAAGAAAGAAGTCATTATTGCAAAG	TCCCACTCTCTAGTGATGACTCAGC	AKT3,
chr8 : 67287955 - 67302466 : ARFGEF1,	0	0	0	7.6721	0	7.55941	0	7.91172	0	0	0.391114	0.869093	0.999043	chr8	67287955	67302466	-	5	GTAG	GAAATGGTGAACATTGTTGTTGGAG	TTTTCAGTTTCCGCTTTTATTTCCT	ARFGEF1,
chr10 : 68647005 - 68644698 : TET1,	0	0	0	4.60326	0	0	3.33402	0	3.28811	3.00992	0.401264	0.872986	0.999043	chr10	68647005	68644698	+	6	GTAG	GAACTGCCCACCTGCAGCTGTCTTG	TTACTGGTTTGTTGTCAAAATCTGC	TET1,
chr2 : 61522611 - 61533903 : XPO1,	4.06864	0	0	0	0	2.74888	0	0	5.48018	0	0.451579	0.874822	0.999043	chr2	61522611	61533903	-	5	GTAG	ATTCTTCCAAGGAACCAGTGCGAAG	TTGTCATAATTGCTGGCATAGATTA	XPO1,
chr12 : 69262562 - 69251129 : CPSF6,	0	5.66588	0	0	0	0	0	0	6.57621	4.51488	0.408776	0.877381	0.999043	chr12	69262562	69251129	+	6	GTAG	GCGCGAATATCGTCATCGTTAGAAG	GATCATGCCCACCATATTCAGCTTC	CPSF6,
chr12 : 103263326 - 103277210 : C12orf42,	0	0	3.39879	0	0	3.4361	0	3.51632	0	0	0.455624	0.877608	0.999043	chr12	103263326	103277210	-	5	GTAG	TTGCTGCTCCTACCTCAAATAGAAG	TGTGTGGCCTGTCCATGGTGACTTC	C12orf42,
chr12 : 111933886 - 111943369 : TMEM116,	0	0	0	3.06884	0	0	0	0	4.38414	2.25744	0.448159	0.880912	0.999043	chr12	111933886	111943369	-	5	GTAG	GCCTTCTTTTGCTGCTGGGGCCCAG	AGAGAAATGAGGAAATGTAGAATAT	TMEM116,
chr11 : 77698487 - 77702495 : RSF1,	14.9184	0	9.06345	0	3.13886	5.49776	0	10.549	10.9604	0	-0.24956	0.881773	0.999043	chr11	77698487	77702495	-	5	GTAG	TGGCCTTCCAAACCATCCTGAGCTA	ATCTTTTCACTTTCTTTCTGTTCCT	RSF1,
chr14 : 74802676 - 74797580 : YLPM1,	5.42486	0	0	3.06884	0	2.06166	0	4.3954	0	3.7624	-0.306796	0.883844	0.999043	chr14	74802676	74797580	+	6	GTAG	ATCTTCAAGACCTGGAATGTATCCG	CTCAAATCTTCGAGGACCATCAAAT	YLPM1,
chr20 : 44503815 - 44510028 : SERINC3,	0	0	0	5.37047	0	0	0	4.3954	6.57621	0	0.382683	0.885402	0.999043	chr20	44503815	44510028	-	5	GTAG	TTGTTCTCTGCCTCTTGTATTCTAG	CCTATCATGCCAACAACAAACCAGA	SERINC3,
chr12 : 28307749 - 28225795 : CCDC91,	5.42486	0	0	0	0	0	4.44537	0	0	6.01984	0.385535	0.885912	0.999043	chr12	28307749	28225795	+	6	GTAG	TCAAGATAGATACAAAGAACTTCAG	AGTCACATAAAGGAGGGTTAGAAGC	CCDC91,
chr12 : 51291591 - 51292344 : BIN2,	0	0	0	3.06884	0	0	0	3.51632	0	0	-0.45143	0.886185	0.999043	chr12	51291591	51292344	-	5	GTAG	TTCCCCCACCTTAATGACATCTCAG	AATGACTAAAGAGCGCCTGCTGCTG	BIN2,
chr13 : 46003139 - 46045516 : ZC3H13,	0	0	0	3.06884	0	0	0	3.51632	0	0	-0.45143	0.886185	0.999043	chr13	46003139	46045516	-	5	GTAG	AAAGAGAAAAGAGAGACAAGCCAAG	TTCTAATTTTTGACATTTTGTACTA	ZC3H13,
chr6 : 158314268 - 158312051 : TULP4,	0	9.91528	4.53172	10.7409	5.49301	0	12.2248	3.51632	15.3445	6.01984	0.130863	0.887447	0.999043	chr6	158314268	158312051	+	6	GTAG	CAACCTCCGGGGCCACAATAGCGAG	TGGGAGGCCCTGGAGTCTTACAAAT	TULP4,
chr2 : 135639074 - 135631718 : R3HDM1,	0	0	0	3.83605	0	0	0	4.3954	0	0	-0.440371	0.887545	0.999043	chr2	135639074	135631718	+	6	GTAG	AGTGGAATCTCAGTCCTGACAAGAG	CAATTTCAGCAGCATCATTCTGTCC	R3HDM1,
chr1 : 40417389 - 40417954 : SMAP2,	0	0	0	4.60326	0	0	0	5.27448	0	0	-0.432615	0.888552	0.999043	chr1	40417389	40417954	-	0	TTGG	TGAGATTGTTGTGAGAATATCTGCA	AAAAATAAGACCTTACAAAAATGAA	SMAP2,
chr11 : 65502910 - 65503548 : AP000769.1,	5.42486	0	1.13293	0	0	0	0	0	5.48018	2.25744	-0.344746	0.891892	0.999043	chr11	65502910	65503548	-	0	TGTT	GTATTTCTCATCAATTCATTATTTT	GCTGTTAGAATCAGATGTTACTGCT	AP000769.1,
chr9 : 19378443 - 19379583 : RPS6,	0	0	5.66465	0	0	4.81054	0	3.51632	0	2.25744	0.327428	0.892193	0.999043	chr9	19378443	19379583	-	0	TCAA	CTGGGCCCCAAAAGAGCTAGCAGAA	GCGTTCATCGTCCACTTCAATGAGT	RPS6,
chr10 : 74989112 - 74969660 : KAT6B,	6.78107	0	0	0	0	0	0	0	0	7.5248	-0.404998	0.893309	0.999043	chr10	74989112	74969660	+	6	GTAG	TTTGGACGGTTTCTCATTGATTTCA	CAAAATTTCAAACAGGATGGGTGTC	KAT6B,
chr18 : 9221999 - 9195551 : ANKRD12,	12.2059	19.8306	19.2598	11.5082	17.2638	25.4271	4.44537	22.8561	6.57621	11.2872	-0.0621538	0.893767	0.999043	chr18	9221999	9195551	+	6	GTAG	TCTGATGATGATGAAAGTTACACAG	TGTAGGATGCAATCTTGTCTTTACT	ANKRD12,
chr1 : 205616478 - 205620838 : ELK4,	6.78107	0	0	0	3.13886	0	0	2.63724	2.19207	0	-0.331807	0.894167	0.999043	chr1	205616478	205620838	-	5	GTAG	GACATTCAACATGATTGCATTTGAA	GACCATTCACTTTTTTGATGATATT	ELK4,
chr11 : 65502641 - 65503574 : AP000769.1,	0	0	6.79759	5.37047	0	7.55941	4.44537	0	9.86432	0	0.224934	0.894326	0.999043	chr11	65502641	65503574	-	0	AAAC	TGACTCAGAAGATGTTATCTGAAAA	AAATTTACATGTTGTGATGTAAATT	AP000769.1,
chr4 : 53444103 - 53425872 : FIP1L1,	8.13729	0	0	20.7147	7.06245	8.24663	0	11.428	17.5366	5.26736	0.170591	0.896422	0.999043	chr4	53444103	53425872	+	6	GTAG	GCACGTGCATTTCCATATGGCAATG	AACATCAATTGCCCCAGGTAATCTC	FIP1L1,
chr19 : 23338727 - 23362725 : ZNF91,	0	0	5.66465	0	0	0	0	0	6.57621	0	-0.398779	0.896423	0.999043	chr19	23338727	23362725	-	5	GTAG	AGGATTTAATTTATTTATATTCAAG	TCTTGAGGAAAATGAGGACATATAC	ZNF91,
chr3 : 56594028 - 56592970 : CCDC66,	0	0	14.7281	12.2754	0	12.37	12.2248	11.428	0	11.2872	0.212261	0.898195	0.999043	chr3	56594028	56592970	+	6	GTAG	ACGACAAAAACAATTAGAGCATCAG	AAGGGTGCTCCAGCAGTACTGTTTC	CCDC66,
chr11 : 118482495 - 118481715 : KMT2A,	9.4935	4.24941	3.39879	0	0	8.24663	3.33402	6.15356	0	4.51488	-0.168037	0.898905	0.999043	chr11	118482495	118481715	+	6	GTAG	TGTAAAACAAAAACCAAAAGAAAAG	GACTTTTTCTCTTTCTTTTTCACAG	KMT2A,
chr5 : 109729513 - 109713520 : MAN2A1,	0	4.24941	0	6.13768	3.92358	4.81054	0	0	9.86432	0	0.230825	0.899093	0.999043	chr5	109729513	109713520	+	6	GTAG	TTCAGAAGAAGGATGCTGTTAAAAG	TTTCTTGCAACATTGAGAGCTGGCC	MAN2A1,
chr5 : 171390106 - 171392978 : NPM1,	6.78107	0	0	0	0	2.74888	0	0	9.86432	0	0.320776	0.899646	0.999043	chr5	171390106	171392978	-	0	TTAC	CGTTCTTAAAGATAACTGGTGCTCA	ATGATGAAGAGGATGATGATGAAGA	NPM1,
chr4 : 128098330 - 128074460 : LARP1B,	5.42486	0	0	0	0	0	0	6.15356	0	0	-0.383687	0.90053	0.999043	chr4	128098330	128074460	+	6	GTAG	TACAAACCTTAATCTCATCTTAGAG	TTTATAATTTTGAGGGAACCGAATT	LARP1B,
chr17 : 62010550 - 62063301 : MED13,	5.42486	0	0	0	3.92358	0	0	0	0	2.25744	-0.359116	0.900775	0.999043	chr17	62010550	62063301	-	5	GTAG	AGGAAAGTGTAACATCAGTTACAGA	TCCACTTAATTCCTGTCAAGTCAGC	MED13,
chr17 : 82472698 - 82459992 : NARF,	0	0	0	5.37047	3.13886	4.81054	0	0	0	2.25744	0.300822	0.901416	0.999043	chr17	82472698	82459992	+	6	GTAG	CCCATGCTGACCTCTGCCTGTCCTG	CAGTTTTTGTTTTCTTACTACATTC	NARF,
chr14 : 88437903 - 88416711 : SPATA7,	0	0	6.79759	0	0	0	0	7.91172	0	0	-0.368139	0.90235	0.999043	chr14	88437903	88416711	+	6	GTAG	AGGCTGCACATCGGAGGAAAACTCG	TTCTCTCTTCGTTGTTGGTCTGCAT	SPATA7,
chr19 : 30012531 - 29971193 : URI1,	0	0	0	7.6721	3.13886	2.74888	0	0	0	8.27728	0.263305	0.904712	0.999043	chr19	30012531	29971193	+	6	GTAG	TTTGCCCTTATCAGTAACACCTGAG	TTCTCTCTTGGCAGTTAGTGACCAC	URI1,
chr14 : 65455718 - 65430216 : FUT8,	8.13729	0	0	8.43932	7.06245	0	4.44537	7.03264	9.86432	0	0.161351	0.905208	0.999043	chr14	65455718	65430216	+	6	GTAG	TTGTTGATTAACTGGACAAATTCAG	TGGGCAACACAGAGAAACCCTGTCT	FUT8,
chr1 : 96785254 - 96769703 : PTBP2,	0	7.08235	3.39879	3.06884	6.27773	6.18498	0	5.27448	0	4.51488	0.157793	0.905964	0.999043	chr1	96785254	96769703	+	6	GTAG	TTTGCCAAGGAGACATCCCTCTTAG	AATTTTTTACTATCATTACCATTGG	PTBP2,
chr2 : 195718332 - 195680032 : SLC39A10,	0	0	4.53172	0	3.13886	0	0	0	5.48018	0	0.327437	0.907405	0.999043	chr2	195718332	195680032	+	6	GTAG	TGTCATGAACTGCCACATGAATTAG	ATATGTACCTTCATTTCTATTTTTC	SLC39A10,
chr1 : 29148080 - 29154910 : SRSF4,	0	0	0	6.90489	0	8.24663	0	0	0	0	-0.340969	0.908392	0.999043	chr1	29148080	29154910	-	5	GTAG	CTCTAAGGCTGGAATGACCACATAG	CTTCTCCTGCCTGACGCATATAATC	SRSF4,
chr1 : 235442911 - 235437322 : TBCE,	0	0	0	5.37047	3.13886	3.4361	0	0	0	0	-0.316952	0.911202	0.999043	chr1	235442911	235437322	+	6	GTAG	AAAGTCCTGGAGAAACAACTGCCGG	TCTCTAGCTCATTGAAAAACGACCA	TBCE,
chr3 : 149921227 - 149846011 : RNF13,	0	7.08235	3.39879	3.06884	7.06245	7.55941	0	0	0	3.00992	-0.176515	0.911903	0.999043	chr3	149921227	149846011	+	6	GTAG	CTTCCTGTACATAAATTCAAGAAAG	GAGCAGCATCTCGTTGTAAAATCAC	RNF13,
chr20 : 35716740 - 35725155 : RBM39,	0	0	0	5.37047	3.13886	0	0	3.51632	0	0	-0.313617	0.91222	0.999043	chr20	35716740	35725155	-	5	GTAG	ATCCAAGGGATATGGATTTATTACA	AGGAGTTAAATTATCAATAGGTTCT	RBM39,
chr14 : 30935163 - 30956242 : STRN3,	0	0	0	3.83605	3.13886	0	0	0	4.38414	0	0.317879	0.9127	0.999043	chr14	30935163	30956242	-	5	GTAG	AGTTCGGGGGATGGCACAGAATGGG	CGCCTTGTAGAAATGCAATCCGGGC	STRN3,
chr11 : 2951259 - 2979237 : NAP1L4,	0	0	0	3.06884	0	0	0	0	0	6.01984	0.340897	0.912964	0.999043	chr11	2951259	2979237	-	5	GTAG	GGATGATGCGGAAATTAACCCCAAG	TCTGCCATCTGAATGTTTTTATCCC	NAP1L4,
chr11 : 77624963 - 77625818 : CLNS1A,	12.2059	18.4141	22.6586	18.4131	24.3262	18.5549	23.3382	15.8234	9.86432	18.812	0.0396381	0.913283	0.999043	chr11	77624963	77625818	-	5	GTAG	GAAGAATATGATGTGGAAGCACATG	TCAGCAACAGGTTCTTTTGATTCTT	CLNS1A,
chr11 : 3731391 - 3753408 : NUP98,	0	0	5.66465	0	0	0	0	0	0	10.5347	0.318024	0.913781	0.999043	chr11	3731391	3753408	-	5	GTAG	TAGCCAATGGAGCATTCATGCCCAA	TTCCCACTGGTATTTGTGCCAAAAC	NUP98,
chr15 : 68153695 - 68141946 : PIAS1,	0	4.24941	9.06345	0	10.986	0	0	6.15356	0	0	-0.207546	0.916291	0.999043	chr15	68153695	68141946	+	6	GTAG	AATCCGGATCATTCTAGAGCTTTAA	CGAAAGCGCTGACTGTTGTCTGATG	PIAS1,
chr20 : 2965202 - 2947982 : PTPRA,	5.42486	5.66588	5.66465	8.43932	11.7707	3.4361	7.77939	4.3954	0	8.27728	-0.0868866	0.916743	0.999043	chr20	2965202	2947982	+	6	GTAG	ACTCCAGAAACTTTCCCTCCTTCAG	TAATTATGCTCTTTGAACATGTGTC	PTPRA,
chr21 : 36248568 - 36247517 : DOPEY2,	0	0	0	3.06884	0	0	0	0	0	3.7624	-0.328451	0.916881	0.999043	chr21	36248568	36247517	+	6	GTAG	TTCCGTTTACTTTAAAACCACCAAA	AATGTTTTCCCTCTTGGAGGTTGTG	DOPEY2,
chr22 : 38485317 - 38485969 : DDX17,	0	0	0	3.06884	0	0	0	0	0	3.7624	-0.328451	0.916881	0.999043	chr22	38485317	38485969	-	0	CTTC	CTAATTGGTTTTATTTCCCTTCACA	GAAGGAGGAGGAGGGGGAGGAGGAG	DDX17,
chr9 : 36351115 - 36353331 : RNF38,	0	0	0	3.06884	0	0	0	0	0	3.7624	-0.328451	0.916881	0.999043	chr9	36351115	36353331	-	5	GTAG	AGATGGAGAAGTAGAAAATTACGAG	CTTCATTTTCTATCCTTTGCAGAGG	RNF38,
chr12 : 53531744 - 53537552 : RP11-793H13.10,ATF7,	0	0	5.66465	0	0	0	0	0	0	6.77232	-0.314818	0.918074	0.999043	chr12	53531744	53537552	-	5	GTAG	TGCCCCATCCCCTGCCCAGCCACAG	ACATGTCAAGGGGCCCAGCAGCAGC	RP11-793H13.10,ATF7,
chr9 : 79709699 - 79704783 : TLE4,	0	14.1647	10.1964	3.83605	6.27773	2.74888	0	10.549	15.3445	9.78224	0.089784	0.918234	0.999043	chr9	79709699	79704783	+	6	GTAG	TGACAGGCATTCCAGGAGGAAAACC	TGGCTGATGGGGATACTGAAGAGCT	TLE4,
chr1 : 42265115 - 42278784 : FOXJ3,	5.42486	0	6.79759	3.83605	8.63188	2.06166	0	4.3954	0	6.77232	-0.128321	0.921723	0.999043	chr1	42265115	42278784	-	5	GTAG	TCGATCTAAGGATGACCCTGGAAAG	AAGTGAGGGAAAGCCTGAGTTACAT	FOXJ3,
chr7 : 105638353 - 105643121 : ATXN7L1,	0	5.66588	0	2.30163	0	0	3.33402	0	3.28811	3.7624	-0.209294	0.922099	0.999043	chr7	105638353	105643121	-	5	GTAG	GACCACCCAACTCTGTACTTCCTAG	TAAACTGACTACAGGAACTGGAACA	ATXN7L1,
chr16 : 3749627 - 3770986 : CREBBP,	12.2059	0	0	0	0	0	6.66805	0	0	8.27728	-0.285697	0.924111	0.999043	chr16	3749627	3770986	-	5	GTAG	AAAATGATACCTTAGACCCCGAACC	GAAGAGCAGCACCAGGCACCTGTCC	CREBBP,
chr12 : 1444750 - 1371833 : ERC1,	0	12.7482	9.06345	19.1803	18.8332	9.62107	13.3361	7.91172	5.48018	5.26736	-0.0591591	0.924761	0.999043	chr12	1444750	1371833	+	6	GTAG	GCTGCAGAAGATGACCCGGGGGCAG	AATGGCAGCCAGAAGAGCTTCTTGC	ERC1,
chr4 : 53444103 - 53399730 : FIP1L1,	0	0	0	6.90489	6.27773	3.4361	0	2.63724	0	0	0.213542	0.925642	0.999043	chr4	53444103	53399730	+	6	GTAG	GCACGTGCATTTCCATATGGCAATG	AGTTTCCAGTTCTTCCCTGCTGTAC	FIP1L1,
chr16 : 68123121 - 68121987 : NFATC3,	14.9184	12.7482	7.93052	7.6721	7.06245	6.18498	11.1134	14.9444	9.86432	12.7922	-0.0463898	0.926971	0.999043	chr16	68123121	68121987	+	6	GTAG	AGCCTGGCCACACCCCTATATTTCG	GATGCACAATCATCTGGCTCAAGAT	NFATC3,
chr2 : 231460797 - 231461922 : NCL,	0	0	0	6.90489	0	0	0	8.7908	0	0	-0.268963	0.927192	0.999043	chr2	231460797	231461922	-	0	AGCC	AAGCTGCAAAAGTTGTTCCTGTGAA	TGGAGTGACAGCTGCTTTCTTGGCT	NCL,
chr10 : 43176032 - 43154897 : CSGALNACT2,	5.42486	0	4.53172	6.90489	7.06245	2.06166	0	0	8.76828	9.78224	0.11185	0.927319	0.999043	chr10	43176032	43154897	+	6	GTAG	TATCGTTCAGATTTCCTGACCATTG	ATCCATTATATTGGTAGTGATTTTT	CSGALNACT2,
chr12 : 92832512 - 92853025 : EEA1,	0	0	0	3.83605	0	4.81054	0	0	0	0	-0.279326	0.928366	0.999043	chr12	92832512	92853025	-	5	GTAG	ACAACTCCAAAGTGAAATTAATCAA	AATTGCTGTTCCAAAGACTGTAGTT	EEA1,
chr3 : 185613408 - 185598412 : SENP2,	0	8.49881	0	0	5.49301	2.06166	3.33402	0	0	0	-0.196886	0.932056	0.999043	chr3	185613408	185598412	+	6	GTAG	CGGAATCAGATTTGAAAATGAAAGT	TTTTTCACTTGGTGAATAAAGCAAT	SENP2,
chr2 : 61343815 - 61350693 : USP34,	0	0	0	4.60326	0	2.74888	0	0	3.28811	0	-0.246528	0.932747	0.999043	chr2	61343815	61350693	-	5	GTAG	ATTTACCATGAACATCTTAGTCAAG	GTATATACCGACTACAATGTTTCAA	USP34,
chr4 : 102689574 - 102714561 : MANBA,	0	0	0	3.83605	7.06245	0	0	0	0	0	0.254496	0.934327	0.999043	chr4	102689574	102714561	-	5	GTAG	CTTAAATATTGAAAAATCAGCTAAG	AGTCCCAACTAAAGGAACATTGCTC	MANBA,
chr16 : 28166508 - 28169909 : XPO6,	0	4.24941	4.53172	2.30163	0	10.3083	0	4.3954	0	0	-0.158041	0.93435	0.999043	chr16	28166508	28169909	-	5	GTAG	CCATCCCCGACCTCAGGAGAAAGTG	GGGTTGTCACAGGGGACTGGATCAA	XPO6,
chr16 : 10473989 - 10419581 : ATF7IP2,	0	4.24941	7.93052	0	3.92358	17.1805	0	0	0	0	0.220574	0.934716	0.999043	chr16	10473989	10419581	+	6	GTAG	GAAGGCCTATCCAACTGCAATACAG	GCTGTCACAGACGGCGGAAGAAAAC	ATF7IP2,
chr1 : 28474151 - 28473554 : PHACTR4,	4.06864	8.49881	0	7.6721	0	5.49776	0	5.27448	10.9604	6.77232	-0.0953394	0.934967	0.999043	chr1	28474151	28473554	+	6	GTAG	CCATCACTATTGAAATGCTAAAAGT	CTGTTTATTGCTTGGGACAGTTCAG	PHACTR4,
chr7 : 150572200 - 150572891 : GIMAP4,	0	0	0	5.37047	3.13886	2.06166	4.44537	0	0	0	0.197701	0.936032	0.999043	chr7	150572200	150572891	-	0	TTTC	CAAGGATGCTGTTTCCTGTTGCACT	TGGAAGATAAAGTGGAGCAGGAAAA	GIMAP4,
chr5 : 50797233 - 50778069 : PARP8,	4.06864	9.91528	5.66465	5.37047	7.06245	2.74888	8.89073	5.27448	4.38414	7.5248	-0.0593897	0.936598	0.999043	chr5	50797233	50778069	+	6	GTAG	GTTTCAAAATGGCCCTATGCTTAGG	TACATCATCAATGGCTCCATATTCC	PARP8,
chr12 : 28259442 - 28225795 : CCDC91,	0	8.49881	0	3.06884	0	0	0	0	8.76828	6.77232	-0.158431	0.938692	0.999043	chr12	28259442	28225795	+	6	GTAG	ATTCCTTGGGCTGCCTTTCCTGCAG	AGTCACATAAAGGAGGGTTAGAAGC	CCDC91,
chr7 : 129014979 - 129018157 : TNPO3,	0	0	5.66465	0	0	0	0	0	4.38414	3.00992	-0.213168	0.939483	0.999043	chr7	129014979	129018157	-	5	GTAG	CTCTAGTACAGTAGTATCTCTATTG	GGTCTGAGATCTCCCATGCATGAAC	TNPO3,
chr7 : 70771644 - 70762870 : AUTS2,	0	4.24941	6.79759	0	2.35415	4.81054	7.77939	0	0	0	-0.144576	0.939717	0.999043	chr7	70771644	70762870	+	6	GTAG	ACTACAAGGAGCATTTCAGCCGAAG	AGCGTGCCAACACCTAACTCCGGAT	AUTS2,
chr11 : 85996826 - 86003451 : PICALM,	6.78107	0	5.66465	0	0	4.12332	6.66805	6.15356	0	0	-0.133921	0.94108	0.999043	chr11	85996826	86003451	-	5	GTAG	TCTCAGGTAGCAAGTACATGGGGAG	AAGCATCAAGAAGACTGCTAGGGGC	PICALM,
chr5 : 122022407 - 122019260 : SRFBP1,	0	7.08235	4.53172	0	7.84716	5.49776	0	5.27448	0	0	0.127984	0.942825	0.999043	chr5	122022407	122019260	+	6	GTAG	CAGGCTCCAAAAACAAGATCCCTAG	CTCTTTCAGTTGCAGTAGAATCTGG	SRFBP1,
chr5 : 36995804 - 36984676 : NIPBL,	0	0	5.66465	0	0	2.06166	0	0	0	5.26736	-0.197332	0.943905	0.999043	chr5	36995804	36984676	+	6	GTAG	AATGATAGTGATGAAGCTTTTGAAT	TGTTTTCTTTTTTTCAAAGGCTTAT	NIPBL,
chr10 : 15833630 - 15847943 : FAM188A,	0	0	4.53172	0	7.84716	0	0	0	0	0	0.213828	0.944509	0.999043	chr10	15833630	15847943	-	5	GTAG	GGTGATAGAGAGTGCTCAGGAATGA	CCCTCTGATTCACTAAACACAAACC	FAM188A,
chr17 : 38850413 - 38853725 : RPL23,	10.8497	0	6.79759	0	0	6.87219	0	0	10.9604	11.2872	0.145456	0.944538	0.999043	chr17	38850413	38853725	-	0	ATTT	CGTAGAAAAGATGGCGTGTTTCTTT	GCTTCGACATCTTGAACGCCGGAAA	RPL23,
chr14 : 64022863 - 63998914 : SYNE2,	5.42486	0	4.53172	4.60326	3.13886	0	0	5.27448	9.86432	5.26736	0.086996	0.947295	0.999043	chr14	64022863	63998914	+	6	GTAG	GGAACAAAAGCTACAAAAACTTTCT	AAGAATATCTCTGTATGTATCATAC	SYNE2,
chr18 : 9216900 - 9182382 : ANKRD12,	5.42486	0	0	0	0	1.37444	0	2.63724	0	3.00992	-0.17069	0.94748	0.999043	chr18	9216900	9182382	+	6	GTAG	TTCTGCTAGTAGTGGGCACAGAGAT	TTTTATCAGTCTTCTCATCCTGGAT	ANKRD12,
chr6 : 47582065 - 47574064 : CD2AP,	0	0	0	8.43932	0	0	11.1134	3.51632	0	0	0.15316	0.949057	0.999043	chr6	47582065	47574064	+	6	GTAG	TTTTCTTTAAAGCCTGAAGAAAAGG	GAAGTAGGCCCAGCCAAAACAGTTT	CD2AP,
chr11 : 96091892 - 96093517 : MAML2,	12.2059	0	0	6.13768	8.63188	8.93385	0	0	0	7.5248	-0.122914	0.950782	0.999043	chr11	96091892	96093517	-	5	GTAG	CCAAGTCTCCCAACAACAGAGACAG	GTTTTCTTTTCAAGGAACCCTGGAG	MAML2,
chr2 : 45546732 - 45562756 : SRBD1,	5.42486	0	0	0	0	0	0	0	0	9.02976	0.181515	0.952147	0.999043	chr2	45546732	45562756	-	5	GTAG	TTGCACCACTGGATGTTGTTTACTG	TTTCTCCACGGTTAATTGCCAGAAT	SRBD1,
chr17 : 32368014 - 32362914 : ZNF207,	0	2.83294	12.4622	3.83605	0	8.93385	7.77939	4.3954	0	9.02976	0.0666332	0.955171	0.999043	chr17	32368014	32362914	+	6	GTAG	CCATCCAGATGAGGATATATCCCTG	CATCATTCCACCCATTGGCATCATT	ZNF207,
chr16 : 48553539 - 48562444 : N4BP1,	0	0	4.53172	0	0	0	4.44537	0	3.28811	0	0.15522	0.956835	0.999043	chr16	48553539	48562444	-	5	GTAG	ACAAGGCGTGATCCTAATGTCACAG	GTTCACAGATTCCTTTAATATATTC	N4BP1,
chr4 : 38125131 - 38089932 : TBC1D1,	0	0	5.66465	0	0	0	0	0	0	7.5248	-0.164229	0.957147	0.999043	chr4	38125131	38089932	+	6	GTAG	ACAGATGGAAAAGACCATCAATCAG	GGAAGCTCTCCCAGCTCTGAATAAT	TBC1D1,
chr14 : 99458279 - 99465813 : SETD3,	4.06864	0	5.66465	0	0	2.06166	3.33402	4.3954	0	3.7624	-0.0950693	0.958002	0.999043	chr14	99458279	99465813	-	5	GTAG	CGCCTACTTCTATAAAGTCATCCAG	CGACTCTTCTTACCCATTTTTCTGA	SETD3,
chr11 : 32935435 - 32927157 : QSER1,	8.13729	12.7482	5.66465	10.7409	7.84716	1.37444	8.89073	16.7025	13.1524	9.78224	0.0313171	0.958767	0.999043	chr11	32935435	32927157	+	6	GTAG	ACTTCTGATAAAAAGAAGAAAACAG	GGGATGTCCTTCTTCATAGCTTAAA	QSER1,
chr6 : 75711416 - 75702645 : SENP6,	9.4935	0	4.53172	4.60326	9.41659	0	5.55671	4.3954	5.48018	2.25744	-0.0561808	0.959411	0.999043	chr6	75711416	75702645	+	6	GTAG	ATTTAAAGCCTACTATCTGTAAACA	AACAACAGCCAAAAACCAGTGTGCA	SENP6,
chr11 : 117999817 - 118000193 : IL10RA,	0	0	0	3.06884	0	0	0	0	5.48018	0	0.157229	0.959878	0.999043	chr11	117999817	118000193	-	3	CTGC	TGCACTAGTTCAGTGAGTTGGCCTC	CCTCATCGGGCCTCTGGGGCAGGAA	IL10RA,
chr2 : 68567387 - 68490190 : APLF,	0	0	0	3.06884	0	0	0	0	5.48018	0	0.157229	0.959878	0.999043	chr2	68567387	68490190	+	6	GTAG	GAATATAGACATAATACGCTTCCAG	TTCTGGATACTCTCTTGTCTGTTAT	APLF,
chr9 : 33996223 - 34017189 : UBAP2,	0	0	0	3.83605	0	0	0	0	5.48018	0	-0.153681	0.960488	0.999043	chr9	33996223	34017189	-	5	GTAG	ATTGCTGGAAGGGAATTCAGACACA	ATAATGTATGTACAAAATAGAAAAT	UBAP2,
chr15 : 93002317 - 92996957 : CHD2,	0	0	0	5.37047	0	0	3.33402	0	4.38414	0	-0.135175	0.961603	0.999043	chr15	93002317	92996957	+	6	GTAG	GAAGTCAAAAGATAAGAAAGAGAAG	CCTCTCCTTTTCCCTGGTCCTTTTC	CHD2,
chr1 : 113829592 - 113834439 : PTPN22,	8.13729	0	0	0	3.13886	0	0	7.91172	0	0	-0.121801	0.961739	0.999043	chr1	113829592	113834439	-	5	GTAG	TGGAAAAAGTTTCACAAGGAGTAAG	TTGGGAACATTTGGTGAGAATTCTC	PTPN22,
chr10 : 28596041 - 28583399 : WAC,	21.6994	8.49881	3.39879	16.1114	9.41659	9.62107	7.77939	30.7678	9.86432	6.01984	-0.02544	0.963533	0.999043	chr10	28596041	28583399	+	6	GTAG	CCTGCACAGAAAACAGAAAGAAAAG	TTTTCTTGTGGAGAGTAACTGGTCC	WAC,
chr10 : 17157441 - 17168917 : TRDMT1,	4.06864	0	0	0	0	0	0	3.51632	0	3.00992	0.132668	0.964043	0.999043	chr10	17157441	17168917	-	5	GTAG	GAAGGTCCGTGTGCTTTACCAAAGG	TGTCAAACTCTTCGAGTGTAATGCC	TRDMT1,
chr7 : 105078963 - 105073619 : KMT2E,	0	16.9976	7.93052	8.43932	7.06245	4.81054	0	13.1862	9.86432	13.5446	-0.0353862	0.964154	0.999043	chr7	105078963	105073619	+	6	GTAG	GCGGTCTTGTACACCCAATGCAGAG	CACTGCCCTCTCTTTATCCAAATTC	KMT2E,
chr2 : 24584560 - 24536715 : NCOA1,	0	0	0	3.06884	3.13886	2.06166	0	0	0	0	0.130778	0.965617	0.999043	chr2	24584560	24536715	+	6	GTAG	TCTGAGGGGCTTAGAAATTAACAGG	CCAGCAAACTCCAACAGACCTGCAG	NCOA1,
chr11 : 35219357 - 35229365 : CD44,	0	0	4.53172	0	4.7083	0	0	2.63724	0	0	0.116084	0.967782	0.999043	chr11	35219357	35229365	-	0	GGAC	TTTGGGGTGTCCTTATAGGACCAGA	ACCATTATCTTGGAAAGAAACAACC	CD44,
chr11 : 83184908 - 83161327 : PCF11,	0	0	3.39879	4.60326	7.06245	0	4.44537	0	0	0	-0.0925116	0.967796	0.999043	chr11	83184908	83161327	+	6	GTAG	AGTCAGTTTAAATAAAATGAGAAAG	CAGGAAGCTTCTCTGAGGAAGGAGC	PCF11,
chr11 : 77619606 - 77625818 : CLNS1A,	0	5.66588	0	0	0	4.12332	0	3.51632	0	0	-0.111288	0.968221	0.999043	chr11	77619606	77625818	-	5	GTAG	TGAAAATGATTTATGCAAGTTTAAG	TCAGCAACAGGTTCTTTTGATTCTT	CLNS1A,
chr19 : 23358430 - 23362725 : ZNF91,	8.13729	15.5812	21.5257	7.6721	9.41659	10.3083	15.5588	15.8234	14.2485	12.7922	-0.0173288	0.968992	0.999043	chr19	23358430	23362725	-	5	GTAG	TATTTATGACCTTTTCTATGGAAAG	TCTTGAGGAAAATGAGGACATATAC	ZNF91,
chr10 : 110132400 - 110124017 : ADD3,	6.78107	0	4.53172	0	3.92358	4.12332	2.22268	2.63724	0	3.00992	-0.0593471	0.969494	0.999043	chr10	110132400	110124017	+	6	GTAG	CAAAATGTCCCTGAAAAATTAGAAG	TGTAAGCATAGCCTGTTCTATACCC	ADD3,
chrX : 148662768 - 148661908 : AFF2,	8.13729	0	4.53172	0	2.35415	13.0572	0	0	0	2.25744	-0.069092	0.969662	0.999043	chrX	148662768	148661908	+	6	GTAG	GTTCACCATCCTCCAAACAAGTGAA	TGGCAAGTGCATCACCTTTGTTTGT	AFF2,
chr9 : 33941649 - 33956146 : UBAP2,	4.06864	0	4.53172	0	0	3.4361	5.55671	0	3.28811	0	-0.0757723	0.970674	0.999043	chr9	33941649	33956146	-	5	GTAG	AGAGTCAGCTCCAGGAACCATCATG	CAGTGAAGACCTTTGTTTCAGAAAG	UBAP2,
chr13 : 95763953 - 95757644 : DNAJC3,	0	0	0	4.60326	2.35415	0	0	0	4.38414	0	-0.099172	0.972661	0.999043	chr13	95763953	95757644	+	6	GTAG	TTGATAGAGGAAATGTATGATGAAG	CATTTTCACTTGGATTAGATTTGAG	DNAJC3,
chr16 : 74459682 - 74463479 : GLG1,	0	0	0	16.1114	0	9.62107	0	0	6.57621	6.77232	-0.0878458	0.973638	0.999043	chr16	74459682	74463479	-	5	GTAG	GATCAAAACAGAATTGTGTAAAAAG	TAGAATCTGCTTCCGGACAGAACCT	GLG1,
chr7 : 105081797 - 105062164 : KMT2E,	0	0	0	6.90489	0	4.12332	3.33402	0	0	3.7624	0.0704583	0.975878	0.999043	chr7	105081797	105062164	+	6	GTAG	CCTTTGATTTTGACTATGGAAATTG	AGGGCTAGCTTCTACGGATTCTGGT	KMT2E,
chr13 : 19633908 - 19646557 : MPHOSPH8,	0	7.08235	0	0	0	0	10.0021	0	0	0	-0.0863829	0.976242	0.999043	chr13	19633908	19646557	-	0	CTCT	CCACCTCGAACACATCCTCTCCGTC	AAGAAAAAATTGAGGCAGAGAGAAG	MPHOSPH8,
chr3 : 119863419 - 119905852 : GSK3B,	5.42486	0	0	0	0	0	0	0	7.67225	0	-0.0885554	0.976918	0.999043	chr3	119863419	119905852	-	5	GTAG	GCACTCTTCAACTTCACCACTCAAG	AACACACAGCCAGCAGACCATACAT	GSK3B,
chrX : 77652114 - 77656653 : ATRX,	0	0	7.93052	0	8.63188	0	0	0	0	3.7624	0.0668444	0.978554	0.999043	chrX	77652114	77656653	-	5	GTAG	GCGTGAGCGAGAAAAATTGAGAGAG	GAATCTTCTGAATCTTCACTGCTCA	ATRX,
chr1 : 243563720 - 243843282 : AKT3,	17.6308	0	0	6.13768	13.3402	7.55941	0	2.63724	13.1524	0	0.0440479	0.979497	0.999043	chr1	243563720	243843282	-	5	GTAG	CACTCCAGAATATCTGGCACCAGAG	TCCCACTCTCTAGTGATGACTCAGC	AKT3,
chr12 : 350621 - 356537 : KDM5A,	0	0	4.53172	3.83605	0	3.4361	0	0	4.38414	4.51488	-0.049155	0.980686	0.999043	chr12	350621	356537	-	5	GTAG	GAGAAAGATTCTGCCAGAAGAAGAG	TTCTACTCACATCTCCAGATTCTGA	KDM5A,
chr5 : 123557564 - 123545417 : CSNK1G3,	13.5621	28.3294	7.93052	13.0426	21.9721	13.0572	12.2248	11.428	14.2485	19.5645	0.00935286	0.98215	0.999043	chr5	123557564	123545417	+	6	GTAG	TTCTATAAGCAGTTAGGATCTGGAG	GATGTGAGCTGATATTGATAGAGAG	CSNK1G3,
chr4 : 109463644 - 109462901 : SEC24B,	0	0	5.66465	0	0	2.06166	0	3.51632	3.28811	0	0.0531471	0.983016	0.999043	chr4	109463644	109462901	+	6	GTAG	GCGAACAACAACCCAACCATTACTG	ACCTGCATTTGATTCTGGGCTGGAC	SEC24B,
chr15 : 44338317 - 44328685 : CASC4,	0	0	9.06345	0	0	2.06166	3.33402	0	8.76828	0	0.0382684	0.986091	0.999043	chr15	44338317	44328685	+	6	GTAG	GCAAAAGTTGATGATCTTCCCCCTG	TCCTGACGAAGCTCAGCAAGTTGCT	CASC4,
chr17 : 74203700 - 74209259 : RPL38,	0	0	14.7281	15.3442	0	0	0	0	12.0564	31.6042	-0.0505171	0.986409	0.999043	chr17	74203700	74209259	-	0	ACTG	CTAGAGACACTCACAGCAAGCAGCA	GCAGCAGATACCTTTACACCCTGGT	RPL38,
chr2 : 112332282 - 112299849 : ZC3H6,	0	0	10.1964	0	0	2.74888	7.77939	5.27448	0	0	0.0355421	0.986456	0.999043	chr2	112332282	112299849	+	6	GTAG	CAGGCGGACGTTCCCAGGAGTTCTG	ACCATCTTCTAATTCGCCATCTTCT	ZC3H6,
chr3 : 170145423 - 170178938 : PHC3,	0	0	4.53172	0	3.92358	0	0	2.63724	0	0	-0.0467301	0.987193	0.999043	chr3	170145423	170178938	-	5	GTAG	TTCCTGTCAGTCTGCAGCTACTCAG	CATAGCTGTACTATGGTCCTTAAAT	PHC3,
chr9 : 33960826 - 33996333 : UBAP2,	0	9.91528	9.06345	2.30163	0	10.9955	0	7.03264	5.48018	7.5248	-0.0176053	0.987709	0.999043	chr9	33960826	33996333	-	5	GTAG	GACAACAGAAGACTGGACTGAAGAT	GATTTTTCCCTGTCACTTCCATAAG	UBAP2,
chr9 : 36351115 - 36357942 : RNF38,	9.4935	0	0	0	0	0	0	6.15356	7.67225	0	-0.0360145	0.987987	0.999043	chr9	36351115	36357942	-	5	GTAG	AGATGGAGAAGTAGAAAATTACGAG	AAACAGGGACTGTTCCTTGATGGAG	RNF38,
chr7 : 33388144 - 33349068 : BBS9,	5.42486	8.49881	0	0	7.06245	2.74888	0	2.63724	7.67225	0	-0.0224195	0.988551	0.999043	chr7	33388144	33349068	+	6	GTAG	CTTGTTAGATGGAACCTACAAGCAG	ATATCACTCTGTTCTGCAGTGTGAC	BBS9,
chr14 : 24209890 - 24211856 : CHMP4A,AL136419.6,CHMP4A,	0	0	5.66465	3.83605	7.84716	4.12332	0	2.63724	0	0	0.0259581	0.989296	0.999043	chr14	24209890	24211856	-	2	GTAT	AAGAAGCACTAAAGCAGTTGGCTGA	GAGGAGTCCAGTGGAGTAGGCCCAA	CHMP4A,AL136419.6,CHMP4A,
chr1 : 155438327 - 155459898 : ASH1L,	5.42486	0	10.1964	9.97374	0	11.6827	5.55671	0	7.67225	14.2971	0.013688	0.989462	0.999043	chr1	155438327	155459898	-	5	GTAG	AAGAAGAGCAAGAGAATAATAAAAG	GGTTTATCAGAGGTTGGCTGGGAGC	ASH1L,
chr18 : 54159765 - 54205157 : MBD2,	0	0	0	4.60326	3.92358	0	0	0	0	3.00992	-0.0299371	0.991682	0.999043	chr18	54159765	54205157	-	5	GTAG	AGATGAAGCCTAAGAATATGATCAG	GCTTCTGAACTTCTTACCACTTGGA	MBD2,
chr12 : 120782655 - 120791557 : SPPL3,	0	0	0	3.06884	0	4.81054	0	0	0	0	0.0315833	0.99195	0.999043	chr12	120782655	120791557	-	5	GTAG	ACTGGCCATTGGCTTCTCATGGATG	ATTTTCAAAGTCCATATTAAGGGAC	SPPL3,
chr11 : 76528466 - 76496215 : EMSY,	0	0	0	4.60326	0	3.4361	0	3.51632	0	0	-0.0277372	0.992291	0.999043	chr11	76528466	76496215	+	6	GTAG	ACAGAGTCCTCCCAGAGTTCCCAAG	ATTTTGATTGCTGATGTAGATACAC	EMSY,
chr3 : 3156219 - 3174261 : CRBN,	8.13729	0	3.39879	0	2.35415	8.24663	3.33402	0	3.28811	0	0.016327	0.992324	0.999043	chr3	3156219	3174261	-	5	GTAG	CTGGCTGTATTCCTTATATGATGCT	ATTCTTCCATATCAGCACCTAGGTA	CRBN,
chr12 : 12519862 - 12521463 : DUSP16,	4.06864	0	7.93052	0	9.41659	4.12332	0	4.3954	0	0	0.013445	0.99404	0.999043	chr12	12519862	12521463	-	5	GTAG	TTCAACTCTGTTCACCTGCTTGCAG	AACAGCTTTACACTGGACTGAAAGC	DUSP16,
chr19 : 14706773 - 14705054 : ZNF333,	0	0	5.66465	0	0	0	0	0	8.76828	0	0.0221328	0.994166	0.999043	chr19	14706773	14705054	+	6	GTAG	AACCCATGGGTGGCCAGGGATTCTG	GCATCCTCAGGAACAGCCCCGGCCC	ZNF333,
chr18 : 13042334 - 12999421 : CEP192,	0	0	4.53172	0	0	0	2.22268	0	0	4.51488	-0.0146672	0.995981	0.999043	chr18	13042334	12999421	+	6	GTAG	AACGGCTGATAAAGGCAAAACAGAG	TATACCTCGAAAATCTTCCATCTCA	CEP192,
chr7 : 26193633 - 26196443 : HNRNPA2B1,	0	8.49881	0	1.53442	0	0	0	5.27448	9.86432	0	0.00969418	0.99639	0.999043	chr7	26193633	26196443	-	0	CCGA	AAGAGGAGGATATGGTGGTGGAGGA	TACTTCCTGGTCCTGGTCCGAAATT	HNRNPA2B1,
chr19 : 10163326 - 10177367 : DNMT1,	8.13729	0	3.39879	5.37047	0	2.74888	5.55671	0	9.86432	7.5248	-0.00218974	0.998615	0.999737	chr19	10163326	10177367	-	5	GTAG	AGCACAGAAGTCAACCCAAAGATCT	ATCCTGGGGCTAGGTGAAGGTTCAG	DNMT1,
chr2 : 73455295 - 73432198 : ALMS1,	0	5.66588	5.66465	0	0	0	0	0	10.9604	6.01984	0.00067267	0.999737	0.999737	chr2	73455295	73432198	+	6	GTAG	TGGAAGAACAACTGACTTGTCCAAG	AGTGATATTCCGACTCTCTTGTTGG	ALMS1,

## Sheet: CD8
TableS1: CircRNAs detected in Sepsis patients (S37,S38,S39,S40,S41,S42) and healthy volunteers (H43,H44,H45,H46).
Statistics: In red are the upregulated and in blue are the down-regulated circRNAs in sepsis relative to health (p<0.05).
	Normalized Counts										Statistics			MapSplice2 output
CircRNA_ID	H43	H44	H45	H46	S37	S38	S39	S40	S41	S42	log2FoldChange	pvalue	padj	chromosome	Doner_end	Acceptor_start	Strand	flank_case	flank_string	doner_seq	acceptor_seq	Annotated_gene_donor
chrX : 77633207 - 77664778 : ATRX,	0	0	0	0	8.82855	18.6291	8.98537	6.27373	6.01154	0	5.52147	0.000119906	0.0760204	chrX	77633207	77664778	-	5	GTAG	TTTAACAAAGCTTTGGTTGATCCAG	TTCTAAAAGCATCTTCTTGGCAATT	ATRX,
chr7 : 158906091 - 158869855 : WDR60,	0	0	0	0	18.9183	5.21615	2.69561	7.84216	0	0	5.01322	0.00514944	0.999028	chr7	158906091	158869855	+	6	GTAG	GTCGGACTCAGGCCCTTAAGCAAAA	TCCAGGTATCATCTTTGGTTCTTCT	WDR60,
chr3 : 105670233 - 105704173 : CBLB,	0	0	0	0	5.04488	2.23549	14.3766	2.35265	6.01154	0	4.81408	0.00587408	0.999028	chr3	105670233	105704173	-	5	GTAG	TATGATCAGCTTCCTTCATGTTCAG	CTGGTGAGTTCTGCCTGTCAGTGCA	CBLB,
chr7 : 140776912 - 140794467 : BRAF,	7.72268	9.43786	6.57818	2.77649	3.78366	0	0	0	0	0	-3.68472	0.0221574	0.999028	chr7	140776912	140794467	-	5	GTAG	CACGACAGACTGCACAGGGCATGGA	AGACGGACTGGTGAGAATTTGGGGC	BRAF,
chr3 : 105693494 - 105704173 : CBLB,	3.86134	7.34056	4.6987	2.77649	0	0	0	0	0	0	-4.71893	0.0259929	0.999028	chr3	105693494	105704173	-	5	GTAG	TTACCACCCTCCTCCCTAGCATAAA	CTGGTGAGTTCTGCCTGTCAGTGCA	CBLB,
chr16 : 3749627 - 3770986 : CREBBP,	0	0	0	0	0	5.21615	7.1883	4.70529	7.01347	0	4.50637	0.0264993	0.999028	chr16	3749627	3770986	-	5	GTAG	AAAATGATACCTTAGACCCCGAACC	GAAGAGCAGCACCAGGCACCTGTCC	CREBBP,
chr7 : 33388144 - 33351219 : BBS9,	4.82668	0	10.3371	5.55298	0	0	0	0	0	0	-4.87111	0.0287017	0.999028	chr7	33388144	33351219	+	6	GTAG	CTTGTTAGATGGAACCTACAAGCAG	CTTACTGTTCTAGTCAAATCTGGTG	BBS9,
chr10 : 96952196 - 96944113 : LCOR,	14.48	29.3622	30.0717	32.3924	18.9183	8.94198	14.3766	12.5475	19.0366	21.6566	-0.768511	0.0299715	0.999028	chr10	96952196	96944113	+	6	GTAG	GCTGCTCCAGTACTCAAGGGAACGG	GTTCATCCAGACCGACTAAGTGTCC	LCOR,
chr9 : 111787947 - 111786793 : C9orf84,	6.75735	9.43786	0	5.55298	16.3959	5.21615	11.681	11.7632	23.0442	12.0315	1.29653	0.0316915	0.999028	chr9	111787947	111786793	+	6	GTAG	AGATTATGACTCACTAAAGACTCGG	GTTGGCATCTTCTTCTAACAGAAGG	C9orf84,
chr5 : 65451475 - 65473952 : ADAMTS6,	0	4.19461	0	0	12.6122	2.98066	9.88391	3.13686	6.01154	3.60944	2.64545	0.035147	0.999028	chr5	65451475	65473952	-	5	GTAG	ACGATAATGCAGTTCTTATTACTAG	TACTAAAGTATGGCCATTTTTTAAC	ADAMTS6,
chr6 : 116689320 - 116692392 : KPNA5,	13.5147	24.119	5.63844	14.8079	0	11.9226	4.49269	8.62637	4.0077	4.81258	-1.30617	0.036221	0.999028	chr6	116689320	116692392	-	3	CTGC	TCTTTCCCTGGACTAGCCATGGCAT	AAATTTAGAAAGCTGCTTTCTAAAG	KPNA5,
chr18 : 13019206 - 12999421 : CEP192,	2.89601	4.19461	3.75896	6.47848	0	0	0	0	0	0	-4.61219	0.0364565	0.999028	chr18	13019206	12999421	+	6	GTAG	GGGTATTGTTCCAGATCTTAACAGT	TATACCTCGAAAATCTTCCATCTCA	CEP192,
chr4 : 48104901 - 48114402 : TXK,	0	0	0	7.40397	3.78366	16.3936	13.4781	27.4476	0	25.2661	2.94999	0.0660319	0.999028	chr4	48104901	48114402	-	5	GTAG	GGCAGAACATCTATTGAGACAAGAG	CAGAAAACCGACTGGATGGTGTTAT	TXK,
chr11 : 65502501 - 65502827 : AP000769.1,	4.82668	4.19461	7.51792	0	0	0	0	0	0	0	-4.54437	0.070495	0.999028	chr11	65502501	65502827	-	0	TTAT	AGTTTAAAATAAACAATTTACAAAA	GAACATTATCTGCATATGCCAAAAA	AP000769.1,
chr16 : 68126610 - 68121987 : NFATC3,	22.2027	16.7784	43.228	27.7649	17.6571	14.9033	17.0722	22.7423	23.0442	13.2346	-0.601862	0.0755178	0.999028	chr16	68126610	68121987	+	6	GTAG	TACTGGGGGACATCCTGTTGTGAAG	GATGCACAATCATCTGGCTCAAGAT	NFATC3,
chr9 : 79709699 - 79704783 : TLE4,	14.48	6.29191	17.8551	3.70199	0	3.72582	10.7824	0	4.0077	0	-1.74741	0.0764113	0.999028	chr9	79709699	79704783	+	6	GTAG	TGACAGGCATTCCAGGAGGAAAACC	TGGCTGATGGGGATACTGAAGAGCT	TLE4,
chr7 : 103319609 - 103322794 : DNAJC2,	3.86134	0	7.51792	4.62748	0	0	0	0	0	0	-4.49891	0.0776028	0.999028	chr7	103319609	103322794	-	5	GTAG	AGGAAAGGCTGCTTTGGAAAAACAG	TTCAATCCATCTCCTCTCATCACGA	DNAJC2,
chr20 : 2965202 - 2947982 : PTPRA,	26.0641	11.5352	11.2769	17.5844	17.6571	5.21615	8.98537	7.84216	12.0231	6.01573	-0.817642	0.0789624	0.999028	chr20	2965202	2947982	+	6	GTAG	ACTCCAGAAACTTTCCCTCCTTCAG	TAATTATGCTCTTTGAACATGTGTC	PTPRA,
chr4 : 87047594 - 87046166 : AFF1,	3.86134	3.14595	13.1564	9.25497	12.6122	13.413	13.4781	10.979	15.0289	15.6409	0.86252	0.0818002	0.999028	chr4	87047594	87046166	+	6	GTAG	GAAGATGCCTTCTCAGTCAGTTGAG	CAGGTTTCTGTCGTCATTGTACAAA	AFF1,
chr5 : 36976402 - 36953618 : NIPBL,	3.86134	6.29191	6.57818	7.40397	7.56733	8.94198	5.39122	14.9001	13.025	20.4535	0.948242	0.0905006	0.999028	chr5	36976402	36953618	+	6	GTAG	TTCTCAAAAGAAGTTCAAGATAAAG	GTCATTACTTCCCATTTCCCAAACA	NIPBL,
chr11 : 119285566 - 119284969 : CBL,	6.75735	17.8271	12.2166	13.8824	16.3959	8.94198	17.0722	21.958	27.0519	32.4849	0.694444	0.0913324	0.999028	chr11	119285566	119284969	+	6	GTAG	CACGTTCAGTCTGGATACCTCCATG	AGAATGGAGAAGGCGGCCGTTCCAC	CBL,
chr10 : 28596041 - 28583399 : WAC,	6.75735	16.7784	9.3974	11.106	0	5.21615	5.39122	5.48951	9.01731	4.81258	-1.11545	0.0915579	0.999028	chr10	28596041	28583399	+	6	GTAG	CCTGCACAGAAAACAGAAAGAAAAG	TTTTCTTGTGGAGAGTAACTGGTCC	WAC,
chr5 : 39201826 - 39202987 : FYB,	0	0	0	0	0	4.47099	5.39122	3.13686	4.0077	0	4.00244	0.0944627	0.999028	chr5	39201826	39202987	-	5	GTAG	TTCCACAAAACCTCTTCTGGAAACA	GGGACTTTACATCTGCCTTTCCATC	FYB,
chr1 : 26732792 - 26729651 : ARID1A,	130.32	84.9408	52.6254	74.0397	74.412	122.952	130.288	123.122	108.208	102.267	0.374128	0.0952994	0.999028	chr1	26732792	26729651	+	6	GTAG	TCAGTCAAGACCCTCCAGCTTGCCT	CCATCTGATCCATTGGACTGGATGG	ARID1A,
chr11 : 77675036 - 77693611 : RSF1,	16.4107	5.24326	0	5.55298	0	0	2.69561	0	4.0077	0	-2.60078	0.095789	0.999028	chr11	77675036	77693611	-	5	GTAG	TCTGAGGAGAATAGTAGAGACTCTG	TATCGCAAGAGTCACACAGAAGAAT	RSF1,
chr9 : 37126942 - 37126312 : ZCCHC7,	24.1334	17.8271	5.63844	20.3609	5.04488	17.1388	9.88391	9.41059	7.01347	9.62517	-0.782473	0.0999569	0.999028	chr9	37126942	37126312	+	6	GTAG	GGATGTGAAAACTCTGTTACTGAAG	TCATAAAAAGTCAGTAACCTTGAAG	ZCCHC7,
chr14 : 45118028 - 45130790 : FKBP3,	8.68802	11.5352	12.2166	7.40397	0	2.98066	5.39122	7.05794	5.00962	6.01573	-1.15482	0.101278	0.999028	chr14	45118028	45130790	-	5	GTAG	GAAAGAAAGGACAGCCTGATGCCAA	TTAATGTTTCCTAATAATTTATGTT	FKBP3,
chr5 : 123575963 - 123545417 : CSNK1G3,	1.93067	0	0	0	3.78366	12.6678	0	3.92108	0	4.81258	3.11049	0.102026	0.999028	chr5	123575963	123545417	+	6	GTAG	AGCATAAACACACATTTAGGAAAAG	GATGTGAGCTGATATTGATAGAGAG	CSNK1G3,
chr2 : 230450255 - 230442937 : SP100,	0	0	3.75896	12.957	0	0	0	0	0	0	-4.56167	0.102605	0.999028	chr2	230450255	230442937	+	6	GTAG	TGCCCGTTGCCCTGTGATGAAGAAA	TACACCCTGGTCTTCCGTGAACATC	SP100,
chr2 : 175111568 - 175121540 : ATF2,	10.6187	0	5.63844	5.55298	22.702	11.9226	16.1737	9.41059	6.01154	3.60944	1.07943	0.102674	0.999028	chr2	175111568	175121540	-	5	GTAG	ACCAGTACAGTCAGAAGCAAAAATG	CCAAATGATCCTCGTTGGTAAAACG	ATF2,
chr14 : 65075774 - 65078036 : MAX,	0	0	0	0	0	5.96132	5.39122	0	7.01347	0	4.10933	0.10694	0.999028	chr14	65075774	65078036	-	5	GTAG	CGGAGGGCCGTGTGACACTCTCGTG	TGTCTAGGATTTGGGCCCGGGATGC	MAX,
chr1 : 155921375 - 155925843 : KIAA0907,	0	0	0	0	0	5.21615	8.08684	0	0	4.81258	4.08615	0.112347	0.999028	chr1	155921375	155925843	-	5	GTAG	GCAGCCTCCAGCTAGCACTGGACAG	ATAATTTATCTTGAACATAATGCAT	KIAA0907,
chr2 : 229858772 - 229859574 : TRIP12,	2.89601	6.29191	4.6987	0	0	0	0	0	0	0	-4.29113	0.113339	0.999028	chr2	229858772	229859574	-	5	GTAG	TCTGGATTACAGGCCAAATTAGCAA	CACAGCAGATGATGAACTGCAGCTT	TRIP12,
chr17 : 32176213 - 32171043 : RHOT1,	3.86134	6.29191	0	3.70199	0	0	0	0	0	0	-4.28796	0.11349	0.999028	chr17	32176213	32171043	+	6	GTAG	ATGAAAGAACAGACAAAGACAGCAG	ATCAGTGATGTCTTCCCAACTCTAG	RHOT1,
chr22 : 45740538 - 45700282 : ATXN10,	0	0	0	0	0	9.68714	0	2.35265	0	6.01573	4.08369	0.114462	0.999028	chr22	45740538	45700282	+	6	GTAG	CAAGAATAAAGATAACCAAGACAAG	AAAAACTGCAGGCCACAGCGAAAAG	ATXN10,
chr1 : 198700808 - 198701299 : PTPRC,	0	0	0	0	0	0	0	0	6.01154	14.4377	4.24825	0.115865	0.999028	chr1	198700808	198701299	-	0	CAAC	CAGTGGTGGTTATGGACGGCATTTA	ATAGACTGTACTGCATTTGTAATTG	PTPRC,
chr2 : 238329342 - 238325306 : TRAF3IP1,	0	0	0	0	17.6571	6.70648	3.59415	0	0	0	4.70519	0.116954	0.999028	chr2	238329342	238325306	+	6	GTAG	AGAGCATGACAAACCTGAGAAAAAG	TCATGAAACCAGTCATTCTAATCAC	TRAF3IP1,
chr10 : 67954595 - 68014186 : HERC4,	0	0	0	0	5.04488	15.6485	5.39122	0	0	0	4.61264	0.118364	0.999028	chr10	67954595	68014186	-	5	GTAG	CAGGCTCATTTGGTTTTCTGATAAG	AGGAACAAAAGCAGAAGTGTGCTGC	HERC4,
chr11 : 45965315 - 45979966 : PHF21A,	0	0	0	0	0	7.45165	0	3.13686	7.01347	0	4.05044	0.119387	0.999028	chr11	45965315	45979966	-	5	GTAG	TAGCAAGCCAAGTCTTGAAAAACAG	TCCGTAGCTGTTCAACTACTCTTTT	PHF21A,
chr7 : 70771644 - 70762870 : AUTS2,	0	0	0	0	0	0	4.49269	3.13686	10.0192	0	4.04827	0.120779	0.999028	chr7	70771644	70762870	+	6	GTAG	ACTACAAGGAGCATTTCAGCCGAAG	AGCGTGCCAACACCTAACTCCGGAT	AUTS2,
chrX : 148662768 - 148661908 : AFF2,	0	0	0	0	6.3061	0	0	7.84216	0	3.60944	4.05005	0.121068	0.999028	chrX	148662768	148661908	+	6	GTAG	GTTCACCATCCTCCAAACAAGTGAA	TGGCAAGTGCATCACCTTTGTTTGT	AFF2,
chr1 : 205771472 - 205773224 : RAB29,	10.6187	4.19461	20.6743	18.5099	11.351	2.23549	8.98537	8.62637	9.01731	4.81258	-0.869251	0.122013	0.999028	chr1	205771472	205773224	-	5	GTAG	GCCCTGCCTGCTCTTGGCCAACAAG	GTATTCCATGGGGAAAGCCTTTTGG	RAB29,
chr1 : 155921375 - 155921918 : KIAA0907,	0	0	0	0	3.78366	0	8.08684	5.48951	0	0	4.02423	0.125826	0.999028	chr1	155921375	155921918	-	5	GTAG	GCAGCCTCCAGCTAGCACTGGACAG	CAAATCTAGAGTATTCAGCATGAAC	KIAA0907,
chr12 : 28391411 - 28255581 : CCDC91,	7.72268	0	7.51792	0	0	0	0	0	0	0	-4.42738	0.127492	0.999028	chr12	28391411	28255581	+	6	GTAG	GTGTGAGGAGTTGCTAAATGCTCAG	TAAGCAGGTCATCCACGTATAGCAC	CCDC91,
chr12 : 46229153 - 46254936 : SLC38A1,	0	0	0	0	10.0898	0	0	3.92108	3.00577	0	3.98378	0.134835	0.999028	chr12	46229153	46254936	-	5	GTAG	CAAACACTGGAATCCTACTTTTTCT	AAATAGCTCAAAAGTTTCCTTGACT	SLC38A1,
chr13 : 19633905 - 19646554 : MPHOSPH8,	0	0	0	0	0	0	13.4781	5.48951	0	0	4.15575	0.134949	0.999028	chr13	19633905	19646554	-	0	CTTT	CCTCGAACACATCCTCTCCGTCCTC	AAAAAGAAAAAATTGAGGCAGAGAG	MPHOSPH8,
chr7 : 158891333 - 158869855 : WDR60,	0	0	0	0	5.04488	8.19681	3.59415	0	0	0	3.9807	0.135039	0.999028	chr7	158891333	158869855	+	6	GTAG	GAGGCCGGGAGGCGAGGAAACCGTG	TCCAGGTATCATCTTTGGTTCTTCT	WDR60,
chr20 : 2965202 - 2964272 : PTPRA,	31.8561	23.0703	12.2166	52.7533	27.7469	19.3743	17.9707	16.4685	22.0423	22.8598	-0.524661	0.135491	0.999028	chr20	2965202	2964272	+	6	GTAG	ACTCCAGAAACTTTCCCTCCTTCAG	GAATGAACCAGGAATCCATGCTTAT	PTPRA,
chr2 : 68545312 - 68490190 : APLF,	0	7.34056	2.81922	0	8.82855	7.45165	5.39122	3.92108	7.01347	8.42202	1.44411	0.140305	0.999028	chr2	68545312	68490190	+	6	GTAG	GTCCCTATGGACCATCCTGTTATAG	TTCTGGATACTCTCTTGTCTGTTAT	APLF,
chr2 : 231460694 - 231461711 : NCL,	0	10.4865	3.75896	0	0	0	0	0	0	0	-4.32714	0.148399	0.999028	chr2	231460694	231461711	-	0	GAAA	AGATGATGATGATGAAGATGATGAG	CCTCCTCACTGTCATCATCCTCCTC	NCL,
chr2 : 175080660 - 175121540 : ATF2,	0	0	0	0	0	0	0	5.48951	7.01347	3.60944	3.91437	0.149381	0.999028	chr2	175080660	175121540	-	5	GTAG	ATGCAGAAGAAATCTGGCTATCATA	CCAAATGATCCTCGTTGGTAAAACG	ATF2,
chr6 : 130154825 - 130184623 : SAMD3,	4.82668	7.34056	10.3371	3.70199	5.04488	0	3.59415	0	0	3.60944	-1.7409	0.155407	0.999028	chr6	130154825	130184623	-	5	GTAG	TCCTTTCTTGAAGTGCCCTTATCAG	TGCTAGAATTTGTTTCACATTTCTT	SAMD3,
chr1 : 31915895 - 31919658 : PTP4A2,	12.5494	13.6325	17.8551	16.6589	15.1347	11.1775	6.28976	10.979	7.01347	9.62517	-0.607871	0.160483	0.999028	chr1	31915895	31919658	-	5	GTAG	TGAAAAAGAAGGAATCCACGTTCTA	TGCAACGTATATTCCAACGAAAAAC	PTP4A2,
chr2 : 231460787 - 231461726 : NCL,	0	0	0	0	12.6122	9.68714	0	0	0	0	4.3805	0.161821	0.999028	chr2	231460787	231461726	-	5	GTAG	AGTTGTTCCTGTGAAAGCCAAGAAC	CATCCTCCTCTTCATCACTGTCTTC	NCL,
chr17 : 36953907 - 36952886 : AATF,	25.0987	26.2163	18.7948	13.8824	13.8734	8.94198	20.6664	11.7632	24.0462	6.01573	-0.557542	0.16549	0.999028	chr17	36953907	36952886	+	6	GTAG	GAATTTTCCAGTGCCCTGAAAAATA	CCTTCCTCATCAGATATTTCCTCAT	AATF,
chr1 : 52515891 - 52526373 : ZCCHC11,	1.93067	7.34056	7.51792	8.32947	0	2.98066	0	3.13686	3.00577	3.60944	-1.55021	0.166336	0.999028	chr1	52515891	52526373	-	5	GTAG	AGATCACATCTTTCGACTTGAAAAA	TTCAAGTCCAGTTTAGGCAAGCAAA	ZCCHC11,
chr16 : 53157541 - 53141179 : CHD9,	3.86134	7.34056	4.6987	4.62748	5.04488	17.1388	10.7824	10.1948	9.01731	3.60944	0.891645	0.168349	0.999028	chr16	53157541	53141179	+	6	GTAG	AAATCACCTATGTTTACAGCGACAG	TAACAGTACTGGTCTCAAAAAATGA	CHD9,
chr1 : 20941491 - 20942330 : EIF4G3,	0	0	7.51792	5.55298	0	0	0	0	0	0	-4.20666	0.169769	0.999028	chr1	20941491	20942330	-	5	GTAG	AATTCAAGAAGGAGCCCTGTCCCAG	ACTGGATCTGGTTTTGGCTTCTCCT	EIF4G3,
chr14 : 64022863 - 63998914 : SYNE2,	0	0	4.6987	2.77649	3.78366	6.70648	5.39122	4.70529	7.01347	4.81258	1.519	0.170237	0.999028	chr14	64022863	63998914	+	6	GTAG	GGAACAAAAGCTACAAAAACTTTCT	AAGAATATCTCTGTATGTATCATAC	SYNE2,
chr1 : 84214317 - 84179177 : PRKACB,	6.75735	6.29191	0	0	0	0	0	0	0	0	-4.20115	0.17099	0.999028	chr1	84214317	84179177	+	6	GTAG	TTGGATTGCTATTTACCAGAGGAAG	TTGGCTTTGGCTAGAAACTCTTTCA	PRKACB,
chr12 : 29338531 - 29341816 : ERGIC2,	0	0	0	0	0	5.96132	5.39122	0	0	3.60944	3.812	0.171459	0.999028	chr12	29338531	29341816	-	5	GTAG	CCTCCTGCTTCCATCTGCTGAGTAG	AATTTTCCAATTCCATGTAACATGC	ERGIC2,
chr2 : 231461658 - 231463229 : NCL,	0	0	0	0	6.3061	0	0	4.70529	4.0077	0	3.80803	0.172084	0.999028	chr2	231461658	231463229	-	0	GAAA	GGAGGATGACGAGGACGAGGATGAG	CTCCACTGCTATCATCTTCTTCATC	NCL,
chr6 : 89084643 - 89083753 : PNRC1,	12.5494	7.34056	10.3371	17.5844	8.82855	9.68714	8.98537	5.48951	5.00962	6.01573	-0.705268	0.178138	0.999028	chr6	89084643	89083753	+	6	GTAG	AGTTTAAATCTGTGGCACAATCAAT	ATTTTCCCATCTTTGATTTTAAAAC	PNRC1,
chr8 : 668598 - 674047 : ERICH1,	7.72268	4.19461	4.6987	4.62748	8.82855	10.4323	10.7824	7.84216	8.01539	9.62517	0.801305	0.179033	0.999028	chr8	668598	674047	-	5	GTAG	CCAGAACATTGCACGATGCCTCCTG	TTTGGCTGGTCATGAGGATCCTGAT	ERICH1,
chr9 : 19300331 - 19288596 : DENND4C,	11.584	5.24326	3.75896	13.8824	0	5.21615	8.08684	2.35265	6.01154	0	-1.22013	0.18109	0.999028	chr9	19300331	19288596	+	6	GTAG	TGGGGTAGCTGAAGCTGTTGTAGCT	AACACAGAAACACGCTGGAACCCCA	DENND4C,
chr17 : 61954936 - 61956481 : MED13,	4.82668	0	7.51792	0	0	0	0	0	0	0	-4.12352	0.181619	0.999028	chr17	61954936	61956481	-	5	GTAG	TTTCAGACTTCTGGCCTCCAGAACT	AGCAGAACTTTTTTTCCGACGAGCC	MED13,
chr2 : 119945240 - 119926598 : PTPN4,	0	0	5.63844	6.47848	0	0	0	0	0	0	-4.0975	0.18446	0.999028	chr2	119945240	119926598	+	6	GTAG	TCCATCTTCTCCTGAAAAACCCACT	AACTGATTGGACTTCAGTTCTCCCA	PTPN4,
chr1 : 151423397 - 151430841 : POGZ,	0	8.38921	3.75896	0	0	0	0	0	0	0	-4.0974	0.18447	0.999028	chr1	151423397	151430841	-	5	GTAG	GTTCATAGTCCCTATGAATCTACTA	CCTTGCTGGACCAAAGGATTGCCAG	POGZ,
chr1 : 117414831 - 117402186 : MAN1A2,	22.2027	15.7298	13.1564	8.32947	16.3959	5.21615	12.5795	10.1948	10.0192	0	-0.713983	0.185308	0.999028	chr1	117414831	117402186	+	6	GTAG	TGAAGACAACCTTGATTTCAGTGTG	ATTTCTCAGACGTTCTTCCTCTTCC	MAN1A2,
chr17 : 78031842 - 78004170 : TNRC6C,	0	6.29191	0	5.55298	0	0	0	0	0	0	-4.06201	0.188386	0.999028	chr17	78031842	78004170	+	6	GTAG	CATCATCCCAGTAAGCTCCAACCAG	TTCTTGTGTTTCTTGCTCTTTCTCC	TNRC6C,
chr1 : 28035544 - 28048426 : EYA3,	0	4.19461	0	7.40397	0	0	0	0	0	0	-4.03268	0.191678	0.999028	chr1	28035544	28048426	-	5	GTAG	CAAACGTATGGACTACCTCCTTTTG	ATTCCTGCATCTTGGCTTTTTTCAC	EYA3,
chr17 : 67975958 - 67945409 : BPTF,	55.0241	66.065	30.0717	71.2632	47.9264	90.165	79.9698	69.7952	86.1654	43.3132	0.33552	0.191731	0.999028	chr17	67975958	67945409	+	6	GTAG	AATTGAAAGGCTTCAAAGCTAGCAG	TTACTCTGCCTTTGTTCACCTGTAC	BPTF,
chr20 : 41512846 - 41533570 : CHD6,	4.82668	0	6.57818	0	0	0	0	0	0	0	-4.00932	0.19433	0.999028	chr20	41512846	41533570	-	5	GTAG	CTCTACACTGGCCTGGCAGGCGGAG	GATTCAAAACTTTTAAATTTGACAA	CHD6,
chr20 : 48953790 - 48951323 : ARFGEF2,	0	0	4.6987	6.47848	0	0	0	0	0	0	-3.9812	0.197559	0.999028	chr20	48953790	48951323	+	6	GTAG	AGAGAAAGAGGCTCATCACTGTCAG	TGATGTGCCCGTATGCGATGAGTTT	ARFGEF2,
chr6 : 130175841 - 130184623 : SAMD3,	13.5147	19.9244	0	5.55298	3.78366	5.21615	7.1883	3.13686	7.01347	0	-1.12997	0.200235	0.999028	chr6	130175841	130184623	-	5	GTAG	TGAAATTAAACTTGTCCAGATAAAA	TGCTAGAATTTGTTTCACATTTCTT	SAMD3,
chr2 : 112332282 - 112299849 : ZC3H6,	0	0	0	4.62748	6.3061	8.94198	3.59415	2.35265	0	6.01573	1.95168	0.201838	0.999028	chr2	112332282	112299849	+	6	GTAG	CAGGCGGACGTTCCCAGGAGTTCTG	ACCATCTTCTAATTCGCCATCTTCT	ZC3H6,
chr10 : 84373815 - 84371014 : CCSER2,	8.68802	5.24326	14.0961	3.70199	0	0	8.98537	3.13686	0	6.01573	-1.39271	0.203073	0.999028	chr10	84373815	84371014	+	6	GTAG	TGAGTCCTCTGAAATGAACAGCATA	ATTTGTTCTTAAAAGTTGAAAGAAT	CCSER2,
chr16 : 68191775 - 68174374 : NFATC3,	0	5.24326	8.45766	1.85099	0	0	0	0	3.00577	0	-2.908	0.204837	0.999028	chr16	68191775	68174374	+	6	GTAG	CTGCAGGACATCACTTTAGATGATG	GGAAGTTCTTGAGCAGACCGCTGGG	NFATC3,
chr9 : 33944365 - 33956146 : UBAP2,	2.89601	14.6811	5.63844	4.62748	22.702	2.98066	10.7824	9.41059	8.01539	18.0472	0.766839	0.206979	0.999028	chr9	33944365	33956146	-	5	GTAG	GCGGCGGATACCCCCAGCTTCTAAG	CAGTGAAGACCTTTGTTTCAGAAAG	UBAP2,
chr4 : 53444103 - 53399730 : FIP1L1,	6.75735	0	0	3.70199	0	0	0	0	0	0	-3.88452	0.208963	0.999028	chr4	53444103	53399730	+	6	GTAG	GCACGTGCATTTCCATATGGCAATG	AGTTTCCAGTTCTTCCCTGCTGTAC	FIP1L1,
chr6 : 145864388 - 145894977 : SHPRH,	6.75735	0	0	3.70199	0	0	0	0	0	0	-3.88452	0.208963	0.999028	chr6	145864388	145894977	-	5	GTAG	CTACAGTTGAGAGATTTGGTGATTT	CTTCCACTTTTGTAGAATGGCTGCC	SHPRH,
chr8 : 28162078 - 28155942 : ELP3,	0	0	0	0	3.78366	4.47099	0	0	5.00962	0	3.63259	0.209369	0.999028	chr8	28162078	28155942	+	6	GTAG	TCTGGGAAAATCGCTGTGATATCAG	GCTAACTAAAGGCATTGGAATATCC	ELP3,
chr17 : 62029541 - 62035608 : MED13,	4.82668	0	0	5.55298	0	0	0	0	0	0	-3.87388	0.210247	0.999028	chr17	62029541	62035608	-	5	GTAG	AAAGAACAAATTGCAGTTGTTTGAG	GGTGAAGGAGCAGGACAAGTGTTCA	MED13,
chr6 : 4892379 - 4891713 : CDYL,	4.82668	5.24326	0	0	0	0	0	0	0	0	-3.82665	0.216015	0.999028	chr6	4892379	4891713	+	6	GTAG	ACAGGCTTAGCTGTTAACGGGAAAG	TCCTTTTGTCAACAATCCTTTCAAC	CDYL,
chr1 : 243572926 - 243843282 : AKT3,	0	4.19461	6.57818	6.47848	0	3.72582	17.9707	5.48951	20.0385	7.21887	1.07465	0.216099	0.999028	chr1	243572926	243843282	-	5	GTAG	AAAGATTGTGTACCGTGATCTCAAG	TCCCACTCTCTAGTGATGACTCAGC	AKT3,
chr12 : 28391411 - 28305649 : CCDC91,	3.86134	0	8.45766	5.55298	0	0	0	0	0	4.81258	-2.55578	0.217184	0.999028	chr12	28391411	28305649	+	6	GTAG	GTGTGAGGAGTTGCTAAATGCTCAG	GATGGTGAAAGATGGACTCCAGATA	CCDC91,
chr2 : 39336920 - 39337581 : MAP4K3,	0	4.19461	5.63844	0	0	0	0	0	0	0	-3.79353	0.220128	0.999028	chr2	39336920	39337581	-	5	GTAG	AGGAAAAATGCACAGAGATATAAAG	TGCAGTTCTGACAGAGGTCCAGTTA	MAP4K3,
chr11 : 77619606 - 77625818 : CLNS1A,	0	0	0	0	0	7.45165	7.1883	0	0	0	3.78488	0.220683	0.999028	chr11	77619606	77625818	-	5	GTAG	TGAAAATGATTTATGCAAGTTTAAG	TCAGCAACAGGTTCTTTTGATTCTT	CLNS1A,
chr4 : 39774933 - 39737420 : UBE2K,	0	4.19461	0	5.55298	0	0	0	0	0	0	-3.78137	0.221652	0.999028	chr4	39774933	39737420	+	6	GTAG	ACAGGATGCTGTAGTAGCAAATCAG	CTACTTTAATTTGATTTTTGCTCGT	UBE2K,
chr10 : 110985765 - 110964125 : SHOC2,	3.86134	3.14595	7.51792	6.47848	0	1.49033	2.69561	0	0	6.01573	-1.65554	0.223438	0.999028	chr10	110985765	110964125	+	6	GTAG	CTGCTAGACCTCCCAGATACTATAG	GTCAATCAATGATTCATTAGAGTTC	SHOC2,
chr11 : 65502800 - 65503291 : AP000769.1,	5.79201	0	0	3.70199	0	0	0	0	0	0	-3.74499	0.226258	0.999028	chr11	65502800	65503291	-	0	TCGG	TTGGCATATGCAGATAATGTTCTCA	TATCAACCATGGCACTTTCTCCTGA	AP000769.1,
chr5 : 55465735 - 55466128 : PLPP1,	0	0	0	0	10.0898	4.47099	0	0	0	0	3.76064	0.226543	0.999028	chr5	55465735	55466128	-	0	GAGT	AGGAGAGGAAGCCTATTGAAAATGA	TTCTCAACTGTCTACCTCTTCAGTC	PLPP1,
chr2 : 99195756 - 99194751 : RP11-111H13.1,MRPL30,	4.82668	0	0	4.62748	0	0	0	0	0	0	-3.73916	0.227002	0.999028	chr2	99195756	99194751	+	6	GTAG	TGCAAATTGTTTTTATTTAAAGATG	GATCTTCAGGTGAGGCCTGAAACAC	RP11-111H13.1,MRPL30,
chr14 : 89161701 - 89180806 : FOXN3,	3.86134	0	0	5.55298	0	0	0	0	0	0	-3.73331	0.227751	0.999028	chr14	89161701	89180806	-	5	GTAG	CAGTGACTCATGGAGAAGAAATGGG	CCATTTTGGATCACTCCTGGAGGAA	FOXN3,
chr20 : 41533050 - 41551360 : CHD6,	15.4454	8.38921	11.2769	12.0315	8.82855	10.4323	5.39122	6.27373	6.01154	9.62517	-0.610753	0.228614	0.999028	chr20	41533050	41551360	-	5	GTAG	CCAGGACGAAGTCCAGGAAGGCCAG	ATCTATTGAAGGAAGATATTTATTT	CHD6,
chr10 : 15821656 - 15847943 : FAM188A,	0	0	0	0	3.78366	4.47099	0	3.92108	0	0	3.51467	0.23193	0.999028	chr10	15821656	15847943	-	5	GTAG	AATGGAAGCTTTAAGATACTGTAAG	CCCTCTGATTCACTAAACACAAACC	FAM188A,
chr11 : 34984728 - 34957384 : PDHX,	0	0	0	0	6.3061	0	3.59415	2.35265	0	0	3.51242	0.233702	0.999028	chr11	34984728	34957384	+	6	GTAG	CCAGGAAATTGCTGACTCTGTAAAG	GTATATTTTTACTTCCTTCTTCAAC	PDHX,
chrX : 101041317 - 101042312 : TRMT2B,	3.86134	5.24326	0	0	0	0	0	0	0	0	-3.68076	0.234557	0.999028	chrX	101041317	101042312	-	5	GTAG	GTTGAGCTATGAAGAACAGCTCAAG	ATCCAAAGAACACACTGAAATCCAC	TRMT2B,
chr11 : 65502910 - 65503548 : AP000769.1,	0	0	0	0	0	0	8.08684	0	6.01154	0	3.72334	0.235475	0.999028	chr11	65502910	65503548	-	0	TGTT	GTATTTCTCATCAATTCATTATTTT	GCTGTTAGAATCAGATGTTACTGCT	AP000769.1,
chr14 : 30935163 - 30956242 : STRN3,	0	5.24326	3.75896	0	0	0	0	0	0	0	-3.66504	0.236621	0.999028	chr14	30935163	30956242	-	5	GTAG	AGTTCGGGGGATGGCACAGAATGGG	CGCCTTGTAGAAATGCAATCCGGGC	STRN3,
chr7 : 77280653 - 77274482 : CCDC146,	0	4.19461	4.6987	0	0	0	0	0	0	0	-3.64821	0.238845	0.999028	chr7	77280653	77274482	+	6	GTAG	AAGCTGTTCAGCATCGAAATGAAAG	TAGACTCCATTTCTGATATAATTTT	CCDC146,
chr1 : 243545510 - 243843282 : AKT3,	17.376	8.38921	19.7345	21.2864	3.78366	2.23549	20.6664	10.1948	15.0289	0	-0.938724	0.23925	0.999028	chr1	243545510	243843282	-	5	GTAG	CTGGCAAGATGTATATGATAAAAAG	TCCCACTCTCTAGTGATGACTCAGC	AKT3,
chr2 : 61278165 - 61281242 : USP34,	0	4.19461	0	4.62748	0	0	0	0	0	0	-3.63705	0.240329	0.999028	chr2	61278165	61281242	-	5	GTAG	CTTTAAATTTTCAAGGGAAGGACAG	TGCATGATTCATGACGAACTGCAGT	USP34,
chr4 : 38103157 - 38089932 : TBC1D1,	10.6187	0	2.81922	3.70199	0	0	0	0	0	4.81258	-2.49124	0.240472	0.999028	chr4	38103157	38089932	+	6	GTAG	CAGCATGCGATTCTTATTGACCTTG	GGAAGCTCTCCCAGCTCTGAATAAT	TBC1D1,
chr1 : 203708104 - 203707009 : ATP2B4,	4.82668	0	3.75896	0	0	0	0	0	0	0	-3.59974	0.245333	0.999028	chr1	203708104	203707009	+	6	GTAG	CAGTGCTTATACCTCCAAGATTCTG	ACCGTGAGAGCAGACATGAGCAGAC	ATP2B4,
chr10 : 27067157 - 27086609 : ANKRD26,	4.82668	0	3.75896	0	0	0	0	0	0	0	-3.59974	0.245333	0.999028	chr10	27067157	27086609	-	5	GTAG	GAAGTGCACAAAAATAATAGAAGTG	ATATTCTGAAATTAGTTGGTGACTG	ANKRD26,
chr12 : 26982773 - 26990627 : TM7SF3,	4.82668	0	3.75896	0	0	0	0	0	0	0	-3.59974	0.245333	0.999028	chr12	26982773	26990627	-	5	GTAG	TTTGGACACAGATTCTGGAAAACAG	TATCATTAGCTGTTAGGGTAACCAC	TM7SF3,
chr4 : 53444103 - 53414634 : FIP1L1,	0	0	0	0	6.3061	0	0	0	0	7.21887	3.64581	0.245746	0.999028	chr4	53444103	53414634	+	6	GTAG	GCACGTGCATTTCCATATGGCAATG	TTCTGGAGGCAGTACTTGTCTGAGA	FIP1L1,
chr3 : 170106832 - 170129552 : PHC3,	3.86134	0	4.6987	0	0	0	0	0	0	0	-3.59562	0.245891	0.999028	chr3	170106832	170129552	-	5	GTAG	TCTGCACTATGTCATGTGCCAAAAG	TGAGGCTGAATTGGAGAATATGAAG	PHC3,
chr9 : 16435555 - 16437524 : BNC2,	3.86134	0	4.6987	0	0	0	0	0	0	0	-3.59562	0.245891	0.999028	chr9	16435555	16437524	-	5	GTAG	TCCCCTCTCGCCGAAGCCGAGACAG	GGTCCAGCACCTTGCCAGCAGCATC	BNC2,
chr4 : 36228582 - 36229645 : ARAP2,	8.68802	8.38921	8.45766	2.77649	0	2.98066	0	8.62637	5.00962	0	-1.30938	0.246292	0.999028	chr4	36228582	36229645	-	5	GTAG	GGTCAACAAAAGGAGTTTCTGGGAG	CAGTGACTGCTTTACCTGCTTAAGC	ARAP2,
chr10 : 110598290 - 110596398 : SMC3,	0	0	0	0	0	5.21615	0	0	4.0077	2.40629	3.44771	0.246649	0.999028	chr10	110598290	110596398	+	6	GTAG	GTCAGAGAAAACCTTCATGCCTAAG	GCACCCCGATGGCTGACTTGGTCAC	SMC3,
chr9 : 33960826 - 33989126 : UBAP2,	0	0	0	0	0	5.96132	0	0	0	7.21887	3.62311	0.248756	0.999028	chr9	33960826	33989126	-	5	GTAG	GACAACAGAAGACTGGACTGAAGAT	TACACCCTACAGTCTCCCATGAAGT	UBAP2,
chr3 : 170113360 - 170136665 : PHC3,	3.86134	4.19461	2.81922	10.1805	13.8734	5.96132	7.1883	14.9001	10.0192	2.40629	0.780308	0.251164	0.999028	chr3	170113360	170136665	-	5	GTAG	GAGATGGAAGACATGATTGCTGAAG	GGCTGCGTAATGTTAAATTCTGAAC	PHC3,
chr1 : 243637611 - 243843282 : AKT3,	0	0	0	0	6.3061	6.70648	0	0	0	0	3.60472	0.251213	0.999028	chr1	243637611	243843282	-	5	GTAG	GAAGAAAGAAGTCATTATTGCAAAG	TCCCACTCTCTAGTGATGACTCAGC	AKT3,
chr1 : 117466427 - 117402186 : MAN1A2,	8.68802	0	5.63844	4.62748	6.3061	0	0	0	0	0	-2.25624	0.251676	0.999028	chr1	117466427	117402186	+	6	GTAG	CCCAGAACAGGGCGCTGGGGTCAGT	ATTTCTCAGACGTTCTTCCTCTTCC	MAN1A2,
chr9 : 83661777 - 83669327 : UBQLN1,	0	0	0	4.62748	10.0898	0	3.59415	4.70529	3.00577	3.60944	1.81865	0.253987	0.999028	chr9	83661777	83669327	-	5	GTAG	TCCCAGCCATCATAGCAGCATTTCT	ATTCCTGGTGTGTTGAACATACTAG	UBQLN1,
chr19 : 20544619 - 20545976 : ZNF737,	0	0	0	0	8.82855	0	0	0	4.0077	0	3.5729	0.255506	0.999028	chr19	20544619	20545976	-	5	GTAG	CCCCTCTACCCTTACTACACATAAG	TCTCGGGCAAAATGAGAACACGTAA	ZNF737,
chr2 : 73491498 - 73489634 : ALMS1,	3.86134	4.19461	0	0	0	0	0	0	0	0	-3.50421	0.258484	0.999028	chr2	73491498	73489634	+	6	GTAG	AGGGGACCCCAGTATTTGCAGATCG	CCATTCCCCGTGGACTCTGTAAACC	ALMS1,
chr11 : 77624963 - 77625818 : CLNS1A,	15.4454	16.7784	15.9756	27.7649	20.1795	16.3936	9.88391	10.979	17.0327	10.8283	-0.429757	0.258988	0.999028	chr11	77624963	77625818	-	5	GTAG	GAAGAATATGATGTGGAAGCACATG	TCAGCAACAGGTTCTTTTGATTCTT	CLNS1A,
chr17 : 38850420 - 38853732 : RPL23,	0	4.19461	0	3.70199	0	0	0	0	0	0	-3.47658	0.262377	0.999028	chr17	38850420	38853732	-	0	TTTT	GTCATACCGTAGAAAAGATGGCGTG	CATCTTGAACGCCGGAAAAAAGAAA	RPL23,
chr18 : 9221999 - 9195551 : ANKRD12,	4.82668	8.38921	13.1564	7.40397	21.4408	14.1581	7.1883	7.84216	13.025	12.0315	0.559082	0.263872	0.999028	chr18	9221999	9195551	+	6	GTAG	TCTGATGATGATGAAAGTTACACAG	TGTAGGATGCAATCTTGTCTTTACT	ANKRD12,
chr2 : 229858772 - 229880128 : TRIP12,	2.89601	4.19461	6.57818	12.0315	13.8734	8.19681	13.4781	7.05794	10.0192	8.42202	0.644835	0.265574	0.999028	chr2	229858772	229880128	-	5	GTAG	TCTGGATTACAGGCCAAATTAGCAA	TACCCTTTCTAGACACTACCATTCA	TRIP12,
chr12 : 50441643 - 50427762 : LARP4,	2.89601	5.24326	3.75896	4.62748	0	0	0	3.13686	0	3.60944	-1.88547	0.266883	0.999028	chr12	50441643	50427762	+	6	GTAG	AACATTTCAGGGCAAGCCAATTATG	AACCAGTTCCTTTAGATGCTACCTG	LARP4,
chr1 : 90937485 - 90982370 : ZNF644,	0	0	0	0	0	0	1.79707	3.92108	5.00962	0	3.33331	0.267031	0.999028	chr1	90937485	90982370	-	5	GTAG	AAAATGGACTTGACTATGCACTCAG	GATCTCATCCAAAATTAAATCAAAC	ZNF644,
chr15 : 90629532 - 90619741 : CRTC3,	0	0	0	0	5.04488	0	0	0	7.01347	0	3.48673	0.267387	0.999028	chr15	90629532	90619741	+	6	GTAG	ACTGGCCCCATATCCTACCTCCCAG	GAGGGCGTCCTGACAGGGACTGAAT	CRTC3,
chr8 : 66572482 - 66593194 : MYBL1,	9.65335	17.8271	7.51792	12.0315	11.351	8.94198	5.39122	14.1159	3.00577	0	-0.695951	0.268605	0.999028	chr8	66572482	66593194	-	5	GTAG	AAAATATGGACCTCTTAAAATTGTG	GTGACACATACTGATACCCAGGGAT	MYBL1,
chr1 : 15721388 - 15717893 : PLEKHM2,	3.86134	0	3.75896	0	0	0	0	0	0	0	-3.42789	0.269338	0.999028	chr1	15721388	15717893	+	6	GTAG	TCTGTACCCAGCACAGACTGGGAAG	AGGGCCAGGTACAGCCAGGCACGGC	PLEKHM2,
chr5 : 109716264 - 109713520 : MAN2A1,	0	0	0	0	0	0	6.28976	5.48951	0	0	3.47126	0.26956	0.999028	chr5	109716264	109713520	+	6	GTAG	GTGCCTCATTCCCATAACGACCCAG	TTTCTTGCAACATTGAGAGCTGGCC	MAN2A1,
chr5 : 113004077 - 112985835 : DCP2,	3.86134	0	0	3.70199	0	0	0	0	0	0	-3.41757	0.270829	0.999028	chr5	113004077	112985835	+	6	GTAG	AATGTCTGACCTTTTAAAAGGAAAG	GCTGGGAATATGCAAAATAAATCGG	DCP2,
chr15 : 92929091 - 92924321 : CHD2,RP11-437B10.1,	0	0	0	0	5.04488	6.70648	0	0	0	0	3.45957	0.271209	0.999028	chr15	92929091	92924321	+	6	GTAG	GAGGCCAGAGGCAGCTGAAAAAACA	CGAAGCTTCTTCAGAGGCTGAGTGA	CHD2,RP11-437B10.1,
chr14 : 39179462 - 39179091 : PNN,	10.6187	0	10.3371	6.47848	0	0	0	7.05794	0	0	-2.50808	0.272769	0.999028	chr14	39179462	39179091	+	6	GTAG	GAAGAGTCACAGAGAAAAATGAACG	GTTCAATTTCCTGGCGCCGCTTTTG	PNN,
chr19 : 30012531 - 29985223 : URI1,	0	5.24326	6.57818	0	0	0	1.79707	0	0	0	-3.09732	0.273016	0.999028	chr19	30012531	29985223	+	6	GTAG	TTTGCCCTTATCAGTAACACCTGAG	ATTATAGTCATTATCTACCTTCTTC	URI1,
chr1 : 23050520 - 23030469 : KDM1A,	0	0	3.75896	3.70199	0	0	0	0	0	0	-3.39889	0.273543	0.999028	chr1	23050520	23030469	+	6	GTAG	TTTTCTTTTCATTAGAAACCGCACA	TTTCATCCATCTCTCTGTACTCTAC	KDM1A,
chr15 : 50583089 - 50592626 : TRPM7,	0	0	3.75896	3.70199	0	0	0	0	0	0	-3.39889	0.273543	0.999028	chr15	50583089	50592626	-	5	GTAG	AGATTCCAAAGCAGCTTTAATACCG	AATCTGAATGCACATCTGTTCCACT	TRPM7,
chr17 : 67964404 - 67945409 : BPTF,	8.68802	0	3.75896	0	5.04488	4.47099	6.28976	4.70529	7.01347	12.0315	1.06915	0.274075	0.999028	chr17	67964404	67945409	+	6	GTAG	GAAGAGGGTGCTCCGTTCCTTACAG	TTACTCTGCCTTTGTTCACCTGTAC	BPTF,
chr1 : 89714851 - 89686470 : LRRC8C,	2.89601	10.4865	6.57818	0	0	3.72582	0	2.35265	3.00577	0	-1.67435	0.277528	0.999028	chr1	89714851	89686470	+	6	GTAG	TTTCTTTCCTACTTAGATGTAAAAG	GAATTCTGTCACGGGAATCATGTTT	LRRC8C,
chr11 : 65502495 - 65502821 : AP000769.1,	0	0	0	0	0	0	0	6.27373	5.00962	0	3.40704	0.27871	0.999028	chr11	65502495	65502821	-	0	AATG	AAATAAACAATTTACAAAATTTTTG	TGATGAGAACATTATCTGCATATGC	AP000769.1,
chr15 : 80122800 - 80120328 : ZFAND6,	7.72268	5.24326	2.81922	19.4354	7.56733	5.96132	5.39122	0	8.01539	0	-0.979734	0.279025	0.999028	chr15	80122800	80120328	+	6	GTAG	GTACCTGAAACAGAAGATGTGCAGG	TGAGCCATGTTCCTCAGTTGCACAC	ZFAND6,
chr5 : 160051183 - 160010500 : TTC1,	0	0	0	3.70199	0	14.1581	3.59415	6.27373	0	0	2.11723	0.279928	0.999028	chr5	160051183	160010500	+	6	GTAG	GAAAGACTAAAAGAAGAGATGTTAG	CCCAGTGAGGGAGGTGACGCTAAAG	TTC1,
chr11 : 108172199 - 108177090 : NPAT,	0	0	0	0	0	5.21615	0	0	0	6.01573	3.39262	0.280793	0.999028	chr11	108172199	108177090	-	5	GTAG	GCTGTGTCACCAAACTTTTCACAAG	CTTCTTCAGACATGTGAATTTCACT	NPAT,
chr16 : 53157541 - 53155926 : CHD9,	0	6.29191	6.57818	3.70199	0	0	2.69561	3.13686	0	0	-2.04699	0.280937	0.999028	chr16	53157541	53155926	+	6	GTAG	AAATCACCTATGTTTACAGCGACAG	TGACATGTCATGAAGTGTCAAAATC	CHD9,
chr14 : 50329833 - 50332432 : ATP5S,CDKL1,	0	0	0	0	7.56733	0	3.59415	0	0	0	3.37206	0.283781	0.999028	chr14	50329833	50332432	-	5	GTAG	GAGTTGCACTTGTATTTCAGTTTAT	GAGTAGGGTCCATGTGGAGACAGCC	ATP5S,CDKL1,
chr2 : 202556531 - 202555252 : BMPR2,	3.86134	0	0	7.40397	0	4.47099	4.49269	9.41059	13.025	7.21887	1.18829	0.283795	0.999028	chr2	202556531	202555252	+	6	GTAG	GTCCTGGATGGCAGCAGTATACAGA	CACACGCCTATTATGTGACAGGTTG	BMPR2,
chr6 : 36515338 - 36540207 : STK38,	0	0	0	0	0	2.98066	0	0	8.01539	0	3.36618	0.28464	0.999028	chr6	36515338	36540207	-	5	GTAG	AGACAACCTTCTTTTGGACAGCAAG	GTTGAGCCTGTCATTGCCATGGCTG	STK38,
chr2 : 105857765 - 105858274 : NCK2,	0	0	0	0	0	5.21615	0	5.48951	0	0	3.34034	0.288435	0.999028	chr2	105857765	105858274	-	0	AAAA	TCCAGGTGAGCATGATAAAGAGATC	CACGGTTTGTTTTTGTTTTTGTTTT	NCK2,
chr15 : 63559970 - 63532647 : USP3,	0	0	0	0	0	3.72582	0	0	7.01347	0	3.33366	0.289421	0.999028	chr15	63559970	63532647	+	6	GTAG	CCAGGAGCCAAGGGGATAACAATGT	CAAGGGCTTTTGTTGGACCGGCACA	USP3,
chr14 : 101909690 - 101893000 : PPP2R5C,	0	0	0	0	6.3061	4.47099	0	0	0	0	3.32869	0.290156	0.999028	chr14	101909690	101893000	+	6	GTAG	AACAGTTCAAAGCAGAGAAACTAAA	TGGTAAGGCAAATCCATTAATTATA	PPP2R5C,
chr9 : 5944871 - 5988545 : KIAA2026,	0	0	0	0	0	7.45165	0	3.13686	0	0	3.32529	0.290662	0.999028	chr9	5944871	5988545	-	5	GTAG	TCTGGAAAACAGTAGAAAAAAATCG	TATCGTTGTCTTTTCTCTCAAGTGC	KIAA2026,
chr8 : 94832174 - 94827263 : INTS8,	0	0	0	0	0	0	0	4.70529	0	6.01573	3.32319	0.290972	0.999028	chr8	94832174	94827263	+	6	GTAG	CAAAACCGAAGAAATGCAGTGCCAG	CATATTCAATACTGGAACAGACAAA	INTS8,
chr10 : 74989112 - 74969660 : KAT6B,	0	0	6.57818	6.47848	0	2.23549	0	0	0	0	-2.89082	0.291082	0.999028	chr10	74989112	74969660	+	6	GTAG	TTTGGACGGTTTCTCATTGATTTCA	CAAAATTTCAAACAGGATGGGTGTC	KAT6B,
chr5 : 71511151 - 71509465 : BDP1,	0	0	5.63844	0	15.1347	2.23549	3.59415	15.6843	0	0	2.10873	0.291773	0.999028	chr5	71511151	71509465	+	6	GTAG	TGCTGTGCCTTCACTAGATATTCAG	ATTTGCCTTATTATTCTCTTGAACG	BDP1,
chr20 : 41101353 - 41092472 : TOP1,	0	0	0	0	5.04488	0	0	5.48951	0	0	3.29838	0.294669	0.999028	chr20	41101353	41092472	+	6	GTAG	GCTTAACCCTAGTTCACGAATCAAG	TTCAGGATAGCGCTCTTCTTCCCAC	TOP1,
chr17 : 49298106 - 49312845 : ZNF652,	0	0	0	0	2.52244	2.98066	0	0	4.0077	0	3.15247	0.297569	0.999028	chr17	49298106	49312845	-	5	GTAG	TTATAATTTCATATCAGCTGATGAG	TGAACGATTTGTTACAGGAAACACA	ZNF652,
chr9 : 33960826 - 33996333 : UBAP2,	13.5147	18.8757	8.45766	11.106	0	7.45165	7.1883	13.3317	13.025	10.8283	-0.564794	0.299525	0.999028	chr9	33960826	33996333	-	5	GTAG	GACAACAGAAGACTGGACTGAAGAT	GATTTTTCCCTGTCACTTCCATAAG	UBAP2,
chr6 : 30670410 - 30671274 : DHX16,	2.89601	5.24326	11.2769	4.62748	0	8.94198	3.59415	1.56843	0	0	-1.29776	0.300472	0.999028	chr6	30670410	30671274	-	5	GTAG	GGCCGAGGAAGACCGGAAGGCCATG	TTTCTACCACTGCCTTTCGTGGTAC	DHX16,
chr7 : 158891333 - 158879684 : WDR60,	7.72268	0	6.57818	8.32947	5.04488	5.96132	0	0	0	0	-1.62596	0.300664	0.999028	chr7	158891333	158879684	+	6	GTAG	GAGGCCGGGAGGCGAGGAAACCGTG	TGTCCTTGCTGTCTCCGTACTGCAG	WDR60,
chr1 : 108699273 - 108699646 : PRPF38B,	0	0	0	0	6.3061	0	0	3.92108	0	0	3.25034	0.301919	0.999028	chr1	108699273	108699646	-	0	TCTT	ACGCTCTAGTCGCTGGCGTTCTTTC	GACAAAAGAGATTCCAAGAAAGAGA	PRPF38B,
chr11 : 34970286 - 34947506 : PDHX,	0	0	0	0	0	5.21615	0	0	0	4.81258	3.23118	0.304842	0.999028	chr11	34970286	34947506	+	6	GTAG	AAAGTTAGGCAAGATCTGGTCAAAG	GCATCTCCAGCACTCACCGCTTCAC	PDHX,
chr4 : 55417985 - 55411614 : TMEM165,	0	6.29191	5.63844	3.70199	0	2.98066	2.69561	0	0	0	-1.99649	0.305159	0.999028	chr4	55417985	55411614	+	6	GTAG	TACAATTGTATTGGCAGCTAGAGAG	CTGGAGCTGCTGGTGTAAATATTTT	TMEM165,
chr1 : 20893517 - 20942330 : EIF4G3,	0	0	0	0	0	2.98066	2.69561	3.13686	0	0	3.061	0.307992	0.999028	chr1	20893517	20942330	-	5	GTAG	GACACCTGGTGGAAGAGGCGTACCT	ACTGGATCTGGTTTTGGCTTCTCCT	EIF4G3,
chr7 : 158918869 - 158869855 : WDR60,	8.68802	4.19461	3.75896	0	27.7469	7.45165	19.7678	10.979	0	0	1.40118	0.310477	0.999028	chr7	158918869	158869855	+	6	GTAG	AACACCAGTCTACCATTCCTTCAAA	TCCAGGTATCATCTTTGGTTCTTCT	WDR60,
chr1 : 198728448 - 198696712 : PTPRC,	0	0	0	0	5.04488	0	0	0	0	4.81258	3.18377	0.312158	0.999028	chr1	198728448	198696712	+	6	GTAG	ATGATCTACATAAGAAAAGATCCTG	CTGGGCATCTTTGCTGTAGTCAATC	PTPRC,
chr11 : 85996826 - 86003451 : PICALM,	18.3414	6.29191	18.7948	13.8824	8.82855	8.19681	10.7824	13.3317	10.0192	12.0315	-0.448774	0.313309	0.999028	chr11	85996826	86003451	-	5	GTAG	TCTCAGGTAGCAAGTACATGGGGAG	AAGCATCAAGAAGACTGCTAGGGGC	PICALM,
chr16 : 69366807 - 69372355 : TERF2,	0	0	0	0	0	0	0	4.70529	0	4.81258	3.15313	0.316948	0.999028	chr16	69366807	69372355	-	5	GTAG	CCCTCCCTGGAGAGAAGAATCCCAA	TGTTTTTGATACAAATAATGACAGC	TERF2,
chr2 : 231460749 - 231461679 : NCL,	0	0	0	0	5.04488	4.47099	0	0	0	0	3.15099	0.317284	0.999028	chr2	231460749	231461679	-	0	CGGA	AAGATGAAGAAGAGGATGATGAGGA	ATCCTCATCCTCGTCCTCGTCATCC	NCL,
chr5 : 36986301 - 36984676 : NIPBL,	11.584	12.5838	6.57818	3.70199	3.78366	5.21615	6.28976	7.05794	6.01154	3.60944	-0.669991	0.318349	0.999028	chr5	36986301	36984676	+	6	GTAG	AATAAACCATCAAAGTCAAATAAAG	TGTTTTCTTTTTTTCAAAGGCTTAT	NIPBL,
chr18 : 56758953 - 56717964 : WDR7,	0	0	0	0	0	2.98066	0	6.27373	0	0	3.132	0.320278	0.999028	chr18	56758953	56717964	+	6	GTAG	ATTGTGCAAGGACAGATTAAACAAG	AGCAGATGCAGTGCTGTACTCTTGC	WDR7,
chr21 : 37430400 - 37420299 : DYRK1A,	0	0	5.63844	12.957	3.78366	0	0	0	0	0	-3.03941	0.320488	0.999028	chr21	37430400	37420299	+	6	GTAG	GGAGAAATGTTACCACTGGATTGAG	AGAGTCCAGCGGCAAAACTATAACA	DYRK1A,
chr20 : 48963898 - 48952705 : ARFGEF2,	0	0	0	0	0	2.98066	6.28976	0	0	0	3.12774	0.320953	0.999028	chr20	48963898	48952705	+	6	GTAG	GATGTAGTCACATCTGCCATTAAAG	GGGAAGTCACTGCAGTCAGAAGAGC	ARFGEF2,
chr1 : 42265115 - 42278784 : FOXJ3,	2.89601	4.19461	2.81922	5.55298	0	0	4.49269	2.35265	0	0	-1.72317	0.322175	0.999028	chr1	42265115	42278784	-	5	GTAG	TCGATCTAAGGATGACCCTGGAAAG	AAGTGAGGGAAAGCCTGAGTTACAT	FOXJ3,
chr5 : 36986301 - 36982165 : NIPBL,	36.6827	27.2649	33.8306	44.4238	54.2325	94.6359	25.159	43.9161	40.077	22.8598	0.402798	0.325019	0.999028	chr5	36986301	36982165	+	6	GTAG	AATAAACCATCAAAGTCAAATAAAG	ATTAGCTATCAGAATACATATATTC	NIPBL,
chrX : 41829127 - 41829481 : CASK,	0	0	0	0	0	4.47099	4.49269	0	0	0	3.08201	0.32825	0.999028	chrX	41829127	41829481	-	0	GTCA	TTGTCCGAAGGGAAAGAGTGGAGCA	TCCATCCATTCTCATTGCTTTGTTG	CASK,
chr3 : 170145423 - 170178938 : PHC3,	1.93067	0	4.6987	8.32947	0	2.23549	1.79707	2.35265	0	0	-1.76145	0.328965	0.999028	chr3	170145423	170178938	-	5	GTAG	TTCCTGTCAGTCTGCAGCTACTCAG	CATAGCTGTACTATGGTCCTTAAAT	PHC3,
chr15 : 57234107 - 57231152 : TCF12,	0	0	0	0	0	0	0	0	4.0077	4.81258	3.03235	0.336295	0.999028	chr15	57234107	57231152	+	6	GTAG	TGCACTTGGAAAGGCTTTGGCATCT	CTGAATTTGGGGATGGTGCATATAC	TCF12,
chr17 : 47379253 - 47361378 : EFCAB13,	0	0	0	0	0	0	0	0	4.0077	4.81258	3.03235	0.336295	0.999028	chr17	47379253	47361378	+	6	GTAG	GAGCGAAGTTTTCCTGAATGCAATG	AAAATCTTCAAGGCATCCTGGAATG	EFCAB13,
chr3 : 170122591 - 170145521 : PHC3,	0	0	0	0	0	0	3.59415	0	5.00962	0	3.01061	0.339857	0.999028	chr3	170122591	170145521	-	5	GTAG	TTGACTTCTGAACATCCTTTGTTAG	CAGTGGTAGCGGGTGTGAAAATCAG	PHC3,
chr2 : 71380565 - 71355719 : ZNF638,	5.79201	0	8.45766	0	0	0	0	0	4.0077	0	-2.42319	0.340649	0.999028	chr2	71380565	71355719	+	6	GTAG	GAAATTGTTACTTCAACTTCTGCTG	ATGTATTTTGATGCTGAATCCAATC	ZNF638,
chr1 : 113833111 - 113855049 : PTPN22,	0	0	0	0	0	0	4.49269	0	4.0077	0	2.99428	0.342548	0.999028	chr1	113833111	113855049	-	5	GTAG	GTAAAACTCCGAAGTCCTAAATCAG	GAAACTGGTAGATAGTTCGAGTTTC	PTPN22,
chr1 : 155947079 - 155947420 : ARHGEF2,	0	0	0	0	0	3.72582	4.49269	0	0	0	2.95731	0.348691	0.999028	chr1	155947079	155947420	-	0	ATCC	ACCTATACTGACCTCTTCCCCAGCC	GGGAGAACAGCAGTAAGAGGTTGAG	ARHGEF2,
chr16 : 30713711 - 30713208 : RP11-2C24.9,SRCAP,	0	0	0	0	0	4.47099	3.59415	0	0	0	2.93192	0.352949	0.999028	chr16	30713711	30713208	+	6	GTAG	AGGTCTAGTCAAACGCCTCCACAAG	GAAAGGCATTGGGCTTGGTCCAGCC	RP11-2C24.9,SRCAP,
chr2 : 24673463 - 24643966 : NCOA1,	0	0	0	0	0	4.47099	3.59415	0	0	0	2.93192	0.352949	0.999028	chr2	24673463	24643966	+	6	GTAG	ATCCTTGGGACCTCTTCTTTTGGAG	CATTTAAGGCCAATTATATAAACAA	NCOA1,
chr12 : 29339851 - 29341816 : ERGIC2,	0	0	0	0	5.04488	0	0	3.13686	0	0	2.92665	0.353837	0.999028	chr12	29339851	29341816	-	5	GTAG	AGGAAATGGGGAAACAAAATTCCAG	AATTTTCCAATTCCATGTAACATGC	ERGIC2,
chr18 : 24083081 - 24064140 : TTC39C,	0	5.24326	5.63844	8.32947	0	8.19681	0	0	0	0	-1.76042	0.354015	0.999028	chr18	24083081	24064140	+	6	GTAG	CAAGGGACGGATACAACGACTAGAG	AAAACTCATTAGTGGGCTATGATTT	TTC39C,
chr7 : 50327757 - 50319048 : IKZF1,	0	3.14595	2.81922	0	3.78366	4.47099	3.59415	5.48951	5.00962	0	1.34081	0.355667	0.999028	chr7	50327757	50319048	+	6	GTAG	AGCTCCAAGAGTGACAGAGTCGTGG	TCAGCATCCATGGTCCTCAGGTTAT	IKZF1,
chr1 : 28476291 - 28473554 : PHACTR4,	0	10.4865	0	9.25497	15.1347	12.6678	3.59415	2.35265	7.01347	10.8283	0.796107	0.361758	0.999028	chr1	28476291	28473554	+	6	GTAG	GAAGATGAAGATGAAAGCTATCAGA	CTGTTTATTGCTTGGGACAGTTCAG	PHACTR4,
chr2 : 229858772 - 229860531 : TRIP12,	0	0	0	3.70199	6.3061	0	0	3.92108	0	10.8283	1.89538	0.362392	0.999028	chr2	229858772	229860531	-	5	GTAG	TCTGGATTACAGGCCAAATTAGCAA	ATGTTTTGCCTGCCCTAAATGTGAC	TRIP12,
chr11 : 34092056 - 34090179 : CAPRIN1,	5.79201	0	1.87948	7.40397	0	0	0	5.48951	0	0	-1.99514	0.363794	0.999028	chr11	34092056	34090179	+	6	GTAG	CTTCAGCAAGAACAGCTTCAAACAG	CACTTGTGGATGATACCAAAGGAAC	CAPRIN1,
chr13 : 45975283 - 46045516 : ZC3H13,	0	0	0	0	0	3.72582	0	0	4.0077	0	2.8654	0.364262	0.999028	chr13	45975283	46045516	-	5	GTAG	ATGGACATGATGAAAGAAAATCAAA	TTCTAATTTTTGACATTTTGTACTA	ZC3H13,
chr13 : 21167988 - 21172681 : SKA3,	0	0	0	0	0	2.98066	0	0	0	4.81258	2.86123	0.364979	0.999028	chr13	21167988	21172681	-	5	GTAG	TTAAAAATGCGAGGAATAATAAAAG	ATTCTCATTGGATAATCTTCAAAGT	SKA3,
chr13 : 26401624 - 26400453 : CDK8,	0	0	0	0	0	0	4.49269	3.13686	0	0	2.8487	0.367138	0.999028	chr13	26401624	26400453	+	6	GTAG	ACTTATCATGACCTCAGACTATCAG	GGTCCATGGTAAGCAGCTTCTGAAG	CDK8,
chr14 : 74802676 - 74797580 : YLPM1,	0	0	0	0	0	0	3.59415	3.92108	0	0	2.82844	0.370644	0.999028	chr14	74802676	74797580	+	6	GTAG	ATCTTCAAGACCTGGAATGTATCCG	CTCAAATCTTCGAGGACCATCAAAT	YLPM1,
chr3 : 170122591 - 170129552 : PHC3,	12.5494	36.7028	17.8551	35.1689	18.9183	26.0808	48.521	25.0949	45.0866	25.2661	0.30912	0.370887	0.999028	chr3	170122591	170129552	-	5	GTAG	TTGACTTCTGAACATCCTTTGTTAG	TGAGGCTGAATTGGAGAATATGAAG	PHC3,
chr12 : 9694969 - 9680923 : CLEC2D,	0	0	0	1.85099	5.04488	0	0	7.05794	2.00385	0	2.29993	0.373023	0.999028	chr12	9694969	9680923	+	6	GTAG	AAGAATTTATTTCTTATACCAACAG	GAATGCTCTTTTGAATGCAGACAAC	CLEC2D,
chr10 : 89762835 - 89751346 : KIF20B,	4.82668	0	4.6987	5.55298	6.3061	0	0	0	0	0	-1.9142	0.373739	0.999028	chr10	89762835	89751346	+	6	GTAG	GAGGAAGAGTAATGAAATGGAGGAG	ATTATTTTCTCTTTAACATTTAGAT	KIF20B,
chr11 : 76472840 - 76463821 : EMSY,	14.48	11.5352	17.8551	13.8824	11.351	6.70648	14.3766	10.1948	13.025	12.0315	-0.370623	0.378982	0.999028	chr11	76472840	76463821	+	6	GTAG	GTGGTCATGTCAACAGTAGCACAAG	TCATCTTCATCTGAACAGCTTACAC	EMSY,
chr2 : 231460828 - 231461845 : NCL,	2.89601	5.24326	4.6987	4.62748	0	3.72582	0	3.13686	4.0077	0	-1.22783	0.378988	0.999028	chr2	231460828	231461845	-	0	GAAG	GCTATGGAGACTACACCAGCCAAAG	CCCTTCTTGCCAGGTGTGGTAACTG	NCL,
chr5 : 66054951 - 66053406 : ERBIN,	7.72268	5.24326	5.63844	0	15.1347	7.45165	4.49269	7.05794	3.00577	8.42202	0.696435	0.379534	0.999028	chr5	66054951	66053406	+	6	GTAG	TATTGAAGCCAAAAAGTTAGAAAAG	GCTGTTAAAATTTTCATCTTCTTGC	ERBIN,
chr1 : 243563720 - 243843282 : AKT3,	19.3067	11.5352	15.9756	0	0	0	8.98537	10.979	0	0	-1.80183	0.379557	0.999028	chr1	243563720	243843282	-	5	GTAG	CACTCCAGAATATCTGGCACCAGAG	TCCCACTCTCTAGTGATGACTCAGC	AKT3,
chr20 : 51516784 - 51524110 : NFATC2,	12.5494	6.29191	11.2769	4.62748	0	0	7.1883	7.84216	9.01731	7.21887	-0.734905	0.380817	0.999028	chr20	51516784	51524110	-	5	GTAG	AACTGGAGGCCACCCTGTGGTTCAG	GCGACCTTATGTGCATTCGGCTCTT	NFATC2,
chr7 : 99493040 - 99494631 : ZNF394,	4.82668	0	5.63844	2.77649	0	0	2.69561	0	3.00577	0	-1.79654	0.3872	0.999028	chr7	99493040	99494631	-	5	GTAG	CTTCTGAAATGTGAGCTGATGCCAG	TTGTTCTCCACTCTGCTTTCCAAAC	ZNF394,
chr11 : 33287511 - 33286413 : HIPK3,	11.584	6.29191	10.3371	4.62748	10.0898	2.98066	5.39122	7.05794	6.01154	0	-0.648776	0.388337	0.999028	chr11	33287511	33286413	+	6	GTAG	CATATCTACAATCTCGGTACTACAG	TAGACCAAGACTTGTGAGGCCATAC	HIPK3,
chr7 : 158876691 - 158869855 : WDR60,	44.4054	12.5838	15.9756	26.8394	29.0081	32.7873	33.2459	49.4056	25.0481	14.4377	0.308783	0.388979	0.999028	chr7	158876691	158869855	+	6	GTAG	AGAAAGAAGATACCGAGAAAGAAAG	TCCAGGTATCATCTTTGGTTCTTCT	WDR60,
chr1 : 117420649 - 117402186 : MAN1A2,	102.326	79.6975	45.1075	63.8593	97.114	58.868	53.9122	52.5425	67.1289	50.5321	-0.206995	0.392158	0.999028	chr1	117420649	117402186	+	6	GTAG	AGCATATTACCTATCAGGAGAGGAG	ATTTCTCAGACGTTCTTCCTCTTCC	MAN1A2,
chr7 : 158788004 - 158799072 : ESYT2,	0	7.34056	0	5.55298	0	0	0	3.92108	0	0	-2.25298	0.393153	0.999028	chr7	158788004	158799072	-	5	GTAG	GTCTATCTTCTTCCTTAGGAAACCA	CTCTTTCAGTGTCTGGAAAATGAAC	ESYT2,
chr9 : 33948374 - 33953474 : UBAP2,	5.79201	4.19461	0	10.1805	0	0	5.39122	4.70529	0	2.40629	-1.25876	0.394225	0.999028	chr9	33948374	33953474	-	5	GTAG	CAGTCCTCAGTCCTCAGTCATCTTG	CTGGAGCAAGGCTACCAGATCAATG	UBAP2,
chr1 : 41070595 - 41075451 : SCMH1,	5.79201	11.5352	5.63844	14.8079	8.82855	3.72582	8.98537	6.27373	10.0192	0	-0.58065	0.395013	0.999028	chr1	41070595	41075451	-	5	GTAG	AGCTCAGCCATGCAGGCCCCAACAG	GGATAGGGATTCTTTGGAATCACAA	SCMH1,
chr12 : 94331700 - 94379042 : CEP83,	0	0	0	0	0	2.98066	3.59415	0	0	0	2.63874	0.404049	0.999028	chr12	94331700	94379042	-	4	GCAG	GCGAGCTGCAATTGCCCAGAAAAAG	CTTTATCTTCCTCCAGTCTTGCAAT	CEP83,
chr4 : 177360677 - 177353308 : NEIL3,	3.86134	0	0	9.25497	21.4408	0	8.08684	9.41059	13.025	0	1.39302	0.404556	0.999028	chr4	177360677	177353308	+	6	GTAG	AGAAGCACAATGTGGATTTTTTGAA	TTTTCTTCACTCTTGAGCACTGAAT	NEIL3,
chr12 : 45926142 - 45928859 : SCAF11,	4.82668	10.4865	0	3.70199	0	0	0	3.13686	4.0077	4.81258	-1.26184	0.404759	0.999028	chr12	45926142	45928859	-	5	GTAG	CAAGAGGAGGAAACATCTGGACAGG	AATGCATATCCCTTGCAAGAAGTAC	SCAF11,
chr12 : 1444750 - 1371833 : ERC1,	0	0	0	15.7334	0	20.1195	3.59415	13.3317	18.0346	7.21887	1.39959	0.413871	0.999028	chr12	1444750	1371833	+	6	GTAG	GCTGCAGAAGATGACCCGGGGGCAG	AATGGCAGCCAGAAGAGCTTCTTGC	ERC1,
chr15 : 41699159 - 41696075 : MGA,	0	0	4.6987	0	10.0898	0	0	3.92108	8.01539	0	1.62708	0.41428	0.999028	chr15	41699159	41696075	+	6	GTAG	GTGATACATCCTGGTCTTCAAGAAG	ATCTTCAAAACTGCTGGCAATAAGA	MGA,
chr5 : 134744052 - 134741063 : CAMLG,	0	0	2.81922	0	5.04488	2.23549	3.59415	3.92108	0	0	1.79851	0.416716	0.999028	chr5	134744052	134741063	+	6	GTAG	GGGATTATACAAATATTTTCCCAAG	TTTGATTTTGTTTGACTTTCTTCTT	CAMLG,
chr2 : 101266879 - 101257791 : CNOT11,	0	0	2.81922	2.77649	0	6.70648	6.28976	0	0	9.62517	1.42035	0.422675	0.999028	chr2	101266879	101257791	+	6	GTAG	TACATTCAATGGAAGTTGTAAATCG	GGTGGAGTTATAGGAGGTAAAAATC	CNOT11,
chr16 : 57164001 - 57173869 : FAM192A,	7.72268	5.24326	7.51792	6.47848	21.4408	2.23549	8.98537	13.3317	3.00577	9.62517	0.510129	0.428256	0.999028	chr16	57164001	57173869	-	5	GTAG	CCTGAGCCAGATGACAAGAATCAAG	CTCCATCCATAATGAAACAACCAAT	FAM192A,
chr2 : 62996766 - 62979188 : EHBP1,	3.86134	0	0	0	5.04488	8.19681	0	5.48951	0	0	1.70041	0.429047	0.999028	chr2	62996766	62979188	+	6	GTAG	CGCCTTCGCTATCTCATGGACACAG	GCCGACGTCGCTCTTCATCTTGCTG	EHBP1,
chr9 : 33948374 - 33956146 : UBAP2,	13.5147	6.29191	8.45766	9.25497	0	0	0	9.41059	9.01731	10.8283	-0.948679	0.431237	0.999028	chr9	33948374	33956146	-	5	GTAG	CAGTCCTCAGTCCTCAGTCATCTTG	CAGTGAAGACCTTTGTTTCAGAAAG	UBAP2,
chr1 : 243552729 - 243843282 : AKT3,	0	0	5.63844	7.40397	5.04488	0	0	0	0	0	-2.01879	0.43172	0.999028	chr1	243552729	243843282	-	5	GTAG	TCTTGATAAAGGATCCAAATAAACG	TCCCACTCTCTAGTGATGACTCAGC	AKT3,
chr15 : 68153695 - 68141946 : PIAS1,	5.79201	3.14595	3.75896	3.70199	5.04488	0	5.39122	0	0	0	-1.26168	0.433011	0.999028	chr15	68153695	68141946	+	6	GTAG	AATCCGGATCATTCTAGAGCTTTAA	CGAAAGCGCTGACTGTTGTCTGATG	PIAS1,
chr14 : 73173707 - 73147795 : PSEN1,	7.72268	0	3.75896	0	0	3.72582	0	0	0	0	-2.15374	0.434275	0.999028	chr14	73173707	73147795	+	6	GTAG	TCTGTATAAATACAGGTGCTATAAG	TCACTTGCAGGCTCCCAGATTAGGT	PSEN1,
chr9 : 37147445 - 37126312 : ZCCHC7,	7.72268	15.7298	10.3371	7.40397	17.6571	2.23549	8.08684	5.48951	4.0077	8.42202	-0.467098	0.440354	0.999028	chr9	37147445	37126312	+	6	GTAG	AATATTGGCTGATGTAGAGCTATAG	TCATAAAAAGTCAGTAACCTTGAAG	ZCCHC7,
chr5 : 143057747 - 143037196 : ARHGAP26,	0	0	6.57818	3.70199	0	0	0	0	0	3.60944	-2.19948	0.440719	0.999028	chr5	143057747	143037196	+	6	GTAG	AGCTGCTCATGAACCACTTGGCAAA	AAGCCAATGCTGTCCAACTGCGCAG	ARHGAP26,
chr6 : 158589782 - 158583954 : TMEM181,	5.79201	0	7.51792	0	3.78366	2.23549	0	0	0	0	-1.75017	0.441316	0.999028	chr6	158589782	158583954	+	6	GTAG	CCCCATCAAGGGAATGAACTTCACA	TTGAAAGTATTTGAATTGGCTTTAG	TMEM181,
chr1 : 243545510 - 243695716 : AKT3,	0	0	5.63844	0	7.56733	2.23549	0	2.35265	10.0192	0	1.37604	0.442927	0.999028	chr1	243545510	243695716	-	5	GTAG	CTGGCAAGATGTATATGATAAAAAG	GGCCTCCAGTTTTTTATATATTCTC	AKT3,
chr5 : 50797233 - 50778069 : PARP8,	13.5147	10.4865	4.6987	11.106	6.3061	8.19681	12.5795	8.62637	6.01154	0	-0.489194	0.444692	0.999028	chr5	50797233	50778069	+	6	GTAG	GTTTCAAAATGGCCCTATGCTTAGG	TACATCATCAATGGCTCCATATTCC	PARP8,
chr20 : 49128786 - 49129271 : STAU1,	0	0	0	2.77649	6.3061	0	0	0	3.00577	6.01573	1.84806	0.445403	0.999028	chr20	49128786	49129271	-	0	TTTT	TAAGGGATGTTTTTGTCTTTTTTTT	ACTGACTACCTGCTAGAATGACTTT	STAU1,
chr13 : 45975283 - 45989097 : ZC3H13,	3.86134	0	2.81922	0	0	11.1775	0	4.70529	0	8.42202	1.28265	0.44999	0.999028	chr13	45975283	45989097	-	5	GTAG	ATGGACATGATGAAAGAAAATCAAA	ATGCTGTCCTGCTGGGGAAGTAGAC	ZC3H13,
chr3 : 51552063 - 51541498 : RAD54L2,	0	3.14595	7.51792	0	0	0	3.59415	0	0	0	-2.12892	0.451666	0.999028	chr3	51552063	51541498	+	6	GTAG	CACGCCCAGCCTAGGATACATTTCT	GGAGTGTGATGGCTTCCTGGGGAAT	RAD54L2,
chr3 : 197875775 - 197865423 : LRCH3,	14.48	8.38921	16.9153	7.40397	0	0	8.98537	9.41059	18.0346	0	-0.951188	0.454294	0.999028	chr3	197875775	197865423	+	6	GTAG	TTGCAGAAAAATTGGTGTACCTCAG	ATAGAGCATTAGGTCTGTCATCACT	LRCH3,
chrX : 132437899 - 132441567 : MBNL3,	8.68802	11.5352	4.6987	13.8824	10.0898	7.45165	15.2751	10.979	10.0192	21.6566	0.360772	0.457145	0.999028	chrX	132437899	132441567	-	5	GTAG	GAAACTTGTTATTGTAAAGATAAAG	CTAGGAAAAGTATTTTAAAAATAAC	MBNL3,
chr10 : 100926019 - 100923975 : SLF2,	2.89601	9.43786	8.45766	2.77649	12.6122	12.6678	5.39122	4.70529	4.0077	10.8283	0.502696	0.457247	0.999028	chr10	100926019	100923975	+	6	GTAG	TGAAGGAAATGGAAGACACACAAAG	GGGAATTTATTCTGCTTAGAGCCTG	SLF2,
chr10 : 31908172 - 31910563 : ARHGAP12,	0	0	0.93974	0	0	4.47099	0	3.92108	0	0	2.27332	0.458646	0.999028	chr10	31908172	31910563	-	5	GTAG	CAGCAGCTCCACTGAACAGATAAGG	ATCTACACCAGTATCACATTTAAAC	ARHGAP12,
chr9 : 97330767 - 97330154 : CCDC180,RP11-23J9.4,CCDC180,RP11-23J9.4,	0	7.34056	1.87948	5.55298	0	0	0	4.70529	0	3.60944	-1.40842	0.461522	0.999028	chr9	97330767	97330154	+	6	GTAG	GCAAGAGAGTTTATCTGTGGGTGAG	TGAAAATGACTTCTCCAGCCAAGTT	CCDC180,RP11-23J9.4,CCDC180,RP11-23J9.4,
chr3 : 169988359 - 169976946 : SEC62,	15.4454	16.7784	8.45766	13.8824	30.2693	20.1195	8.08684	15.6843	10.0192	18.0472	0.308293	0.463068	0.999028	chr3	169988359	169976946	+	6	GTAG	GCCAGTATTCTTCTCCTTGCTGTTG	AAAAGACAGTCCACTGCTTTTGAAG	SEC62,
chr3 : 149921227 - 149846011 : RNF13,	4.82668	0	4.6987	0	6.3061	11.1775	0	6.27373	5.00962	0	1.01536	0.465301	0.999028	chr3	149921227	149846011	+	6	GTAG	CTTCCTGTACATAAATTCAAGAAAG	GAGCAGCATCTCGTTGTAAAATCAC	RNF13,
chr3 : 170122591 - 170136665 : PHC3,	0	0	0	3.70199	0	9.68714	0	0	4.0077	3.60944	1.63617	0.465754	0.999028	chr3	170122591	170136665	-	5	GTAG	TTGACTTCTGAACATCCTTTGTTAG	GGCTGCGTAATGTTAAATTCTGAAC	PHC3,
chr9 : 83678441 - 83686155 : UBQLN1,	0	6.29191	2.81922	2.77649	6.3061	9.68714	12.5795	0	4.0077	0	0.883735	0.46728	0.999028	chr9	83678441	83686155	-	5	GTAG	AATGCTGAGTGCTGCACAAGAGCAG	AACGTTTAGAGATTTCTTCCTTAAA	UBQLN1,
chr19 : 55386576 - 55388336 : RPL28,	3.86134	0	2.81922	1.85099	0	0	0	3.13686	0	0	-1.93822	0.471231	0.999028	chr19	55386576	55388336	-	0	GGGG	AGGAATTGCGGGCCTTCAAGTTATT	CGCCCCACCAAGAGCTCCTGAGCCC	RPL28,
chrX : 77652114 - 77656653 : ATRX,	3.86134	4.19461	0	10.1805	0	4.47099	0	7.05794	0	0	-1.20236	0.473968	0.999028	chrX	77652114	77656653	-	5	GTAG	GCGTGAGCGAGAAAAATTGAGAGAG	GAATCTTCTGAATCTTCACTGCTCA	ATRX,
chr6 : 30605923 - 30607891 : PPP1R10,	0	0	0	10.1805	0	0	0	3.13686	0	0	-2.20099	0.474166	0.999028	chr6	30605923	30607891	-	5	GTAG	AAAGTGAAGATCATCCCGCCACAGC	GCTTCACCAGTTTAGCTGTGTTGTT	PPP1R10,
chr1 : 151107222 - 151088190 : GABPB2,	0	5.24326	3.75896	0	0	0	0	0	3.00577	0	-2.1066	0.474508	0.999028	chr1	151107222	151088190	+	6	GTAG	GTAACTGTGCAAGATGGACAGCAAG	TCTTTCCCAAGTCCACCAAAGACAT	GABPB2,
chr11 : 108229323 - 108227595 : ATM,	0	0	0	7.40397	0	3.72582	6.28976	3.13686	0	12.0315	1.16786	0.479977	0.999028	chr11	108229323	108227595	+	6	GTAG	TACTTCATCAAATGTGCAAACAGAA	ACAATTTCAGAACACACATCACTGT	ATM,
chr14 : 49825867 - 49831361 : NEMF,	0	7.34056	2.81922	5.55298	0	0	0	0	4.0077	6.01573	-1.26344	0.486447	0.999028	chr14	49825867	49831361	-	5	GTAG	TTCAAAAAGCAAGAAAAGTATATTG	TCTTGGAATAAAATTCATCCACCGC	NEMF,
chr7 : 139715932 - 139717015 : HIPK2,	4.82668	0	8.45766	9.25497	0	2.98066	4.49269	5.48951	6.01154	0	-0.810437	0.490046	0.999028	chr7	139715932	139717015	-	5	GTAG	CCTACTTGCAGTCCAGATATTACAG	AAAACTTGCACATGTGAGGCCATAC	HIPK2,
chr22 : 38485317 - 38485969 : DDX17,	0	0	2.81922	0	11.351	0	7.1883	0	0	0	2.1206	0.491351	0.999028	chr22	38485317	38485969	-	0	CTTC	CTAATTGGTTTTATTTCCCTTCACA	GAAGGAGGAGGAGGGGGAGGAGGAG	DDX17,
chr15 : 64500166 - 64499293 : ZNF609,	8.68802	16.7784	6.57818	11.106	5.04488	0	22.4634	2.35265	9.01731	7.21887	-0.493081	0.492573	0.999028	chr15	64500166	64499293	+	6	GTAG	GCTAAAGAAAGTCAAGTCTGAAAAG	ACATGCCCAGTGGACAACATCATTG	ZNF609,
chr9 : 85669485 - 85712566 : AGTPBP1,	4.82668	6.29191	0	0	0	0	4.49269	0	0	0	-1.87326	0.493599	0.999028	chr9	85669485	85712566	-	5	GTAG	GTAAGAAGAATTCCAGTCTTATAAA	ACTTCATTTCATAATTGCAGATAAT	AGTPBP1,
chr11 : 128484823 - 128490576 : ETS1,	2.89601	5.24326	3.75896	0	0	1.49033	0	0	5.00962	0	-1.44646	0.496049	0.999028	chr11	128484823	128490576	-	5	GTAG	ATGTGCATGGGGAGGACCAGTCGTG	AGTGGGACATCTGCACATTCCATAT	ETS1,
chr17 : 74203700 - 74209259 : RPL38,	0	7.34056	6.57818	2.77649	0	8.94198	8.98537	10.1948	0	16.844	0.850199	0.49699	0.999028	chr17	74203700	74209259	-	0	ACTG	CTAGAGACACTCACAGCAAGCAGCA	GCAGCAGATACCTTTACACCCTGGT	RPL38,
chr5 : 65572286 - 65567513 : PPWD1,	0	5.24326	0	3.70199	0	0	0	0	0	3.60944	-1.98986	0.497029	0.999028	chr5	65572286	65567513	+	6	GTAG	GAGAGTCTTTGATGAATCACTAAGC	AGATAGACTCTTTCAAACTCTAAGA	PPWD1,
chr1 : 161792327 - 161778244 : ATF6,	0	0	9.3974	7.40397	0	5.96132	0	0	0	0	-2.0504	0.497326	0.999028	chr1	161792327	161778244	+	6	GTAG	AGTTTACAACCTGCACCCACTAAAG	CCGAGTTCAGCAAAGAGAGCAGAAT	ATF6,
chr14 : 99458279 - 99465813 : SETD3,	5.79201	10.4865	7.51792	0	6.3061	0	8.98537	0	4.0077	0	-0.896631	0.497535	0.999028	chr14	99458279	99465813	-	5	GTAG	CGCCTACTTCTATAAAGTCATCCAG	CGACTCTTCTTACCCATTTTTCTGA	SETD3,
chr12 : 122340753 - 122341697 : CLIP1,	9.65335	5.24326	14.0961	6.47848	0	4.47099	9.88391	5.48951	16.0308	0	-0.550026	0.498573	0.999028	chr12	122340753	122341697	-	5	GTAG	TGAAAAGAATGCTGAAAGTAGCAAG	GTGACTTTTCTGAAACTGTAGCCAC	CLIP1,
chr16 : 68123121 - 68121987 : NFATC3,	21.2374	16.7784	22.5538	12.0315	7.56733	18.6291	18.8693	10.1948	16.0308	19.2503	-0.258974	0.500355	0.999028	chr16	68123121	68121987	+	6	GTAG	AGCCTGGCCACACCCCTATATTTCG	GATGCACAATCATCTGGCTCAAGAT	NFATC3,
chr10 : 43176032 - 43154897 : CSGALNACT2,	3.86134	5.24326	2.81922	0	8.82855	14.9033	0	4.70529	3.00577	0	0.831256	0.501075	0.999028	chr10	43176032	43154897	+	6	GTAG	TATCGTTCAGATTTCCTGACCATTG	ATCCATTATATTGGTAGTGATTTTT	CSGALNACT2,
chr3 : 71041328 - 71053773 : FOXP1,	3.86134	0	5.63844	4.62748	0	0	2.69561	0	6.01154	0	-1.2844	0.501248	0.999028	chr3	71041328	71053773	-	5	GTAG	CAGTCCACACTCCCAAAAGGGAAAG	TCATCATAGCCACTGACACGGGAAC	FOXP1,
chr5 : 168494650 - 168488602 : RARS,	5.79201	7.34056	0	4.62748	5.04488	2.23549	0	0	6.01154	0	-1.01835	0.501391	0.999028	chr5	168494650	168488602	+	6	GTAG	ACCTGCTCTGGGAGAGAATAAAAAG	CAGTCAGAGATTTAATCTCTTCTTC	RARS,
chr7 : 105142008 - 105143330 : SRPK2,	0	7.34056	3.75896	0	0	2.23549	0	0	3.00577	0	-1.6449	0.502148	0.999028	chr7	105142008	105143330	-	5	GTAG	TCCAGTACTGGGGATTTGCCAAAAG	TTTTGTTTTTAGATATTTTTCCTAT	SRPK2,
chr4 : 94586444 - 94573351 : PDLIM5,	13.5147	10.4865	13.1564	12.0315	5.04488	17.1388	12.5795	7.84216	7.01347	8.42202	-0.31861	0.507519	0.999028	chr4	94586444	94573351	+	6	GTAG	AAGCCGATAATACAAAGAAGGCAAA	CTCAGGCTTGGGTGCAGCAGATGCT	PDLIM5,
chr3 : 172381093 - 172362633 : FNDC3B,	0	0	0	4.62748	6.3061	0	3.59415	8.62637	0	0	1.40761	0.508295	0.999028	chr3	172381093	172362633	+	6	GTAG	TGGAAGAGAATCTGAGTACAAACAG	TTCATTTATAGCCTGAATTCTGATC	FNDC3B,
chr21 : 31700995 - 31706357 : SCAF4,	0	0	17.8551	4.62748	3.78366	6.70648	0	0	0	0	-1.68024	0.509237	0.999028	chr21	31700995	31706357	-	5	GTAG	TGAACAGAAAACTGCATTTGACAAG	GTTTCATATCCATAAGCGAAAAGAG	SCAF4,
chr4 : 3107423 - 3086939 : HTT,	2.89601	0	6.57818	0	0	3.72582	0	0	0	0	-1.88142	0.514465	0.999028	chr4	3107423	3086939	+	6	GTAG	TTTTGCAAATGACAATGAAATTAAG	CTTGGTAGCTGAAAGTTCTTTCTTT	HTT,
chr11 : 128459666 - 128460219 : ETS1,	5.79201	0	3.75896	0	0	9.68714	4.49269	0	8.01539	4.81258	0.918717	0.519535	0.999028	chr11	128459666	128460219	-	0	TGGT	CCAGAGACCATCCCAGGAAGAGTGG	AATGTAGTCCAAACAGTTCCACCCA	ETS1,
chr2 : 168129541 - 168140758 : STK39,	3.86134	0	5.63844	0	0	0	0	0	4.0077	0	-1.83673	0.522732	0.999028	chr2	168129541	168140758	-	5	GTAG	AGACATAGCCCAAAGAGCCAAAAAG	GCTAGGAACGCACTTACCCCAAAAT	STK39,
chr11 : 68576043 - 68567014 : PPP6R3,	0	8.38921	0	0	0	2.98066	0	0	0	0	-1.96348	0.524389	0.999028	chr11	68576043	68567014	+	6	GTAG	TAACAAGAGGAACACGGTAGATCTA	CCCATGTGGTCTTCATCACACTTTT	PPP6R3,
chr10 : 110132400 - 110124017 : ADD3,	3.86134	0	3.75896	2.77649	0	0	1.79707	0	4.0077	0	-1.42664	0.524826	0.999028	chr10	110132400	110124017	+	6	GTAG	CAAAATGTCCCTGAAAAATTAGAAG	TGTAAGCATAGCCTGTTCTATACCC	ADD3,
chr12 : 120782655 - 120784593 : SPPL3,	0	5.24326	0	5.55298	5.04488	0	0	0	0	0	-1.7361	0.524992	0.999028	chr12	120782655	120784593	-	5	GTAG	ACTGGCCATTGGCTTCTCATGGATG	TGGGTAGAGTCAATTGTTTGGATGC	SPPL3,
chr1 : 28474151 - 28473554 : PHACTR4,	5.79201	4.19461	0	13.8824	8.82855	2.23549	4.49269	0	6.01154	0	-0.751904	0.526231	0.999028	chr1	28474151	28473554	+	6	GTAG	CCATCACTATTGAAATGCTAAAAGT	CTGTTTATTGCTTGGGACAGTTCAG	PHACTR4,
chr17 : 67948306 - 67945409 : BPTF,	14.48	31.4595	18.7948	24.0629	23.9632	25.3356	41.3327	20.3896	18.0346	24.0629	0.2087	0.527249	0.999028	chr17	67948306	67945409	+	6	GTAG	CAAGGATCTGCAAATTGAAGTGCAG	TTACTCTGCCTTTGTTCACCTGTAC	BPTF,
chr8 : 144789851 - 144791316 : RPL8,	0	0	0	10.1805	0	0	0	3.92108	0	0	-1.92708	0.529118	0.999028	chr8	144789851	144791316	-	3	CTGC	GTGGGTCTCATTGCTGCCCGCCGGA	TGGCTGAGGAGATAACCTTCTTGGA	RPL8,
chr17 : 61984171 - 61985090 : MED13,	2.89601	3.14595	11.2769	12.957	6.3061	2.98066	0	7.84216	13.025	0	-0.593107	0.530131	0.999028	chr17	61984171	61985090	-	5	GTAG	CTTCAATGCCATTCATCAAAGAGGG	CATTTGCTGATTTTTTAGATCCAGG	MED13,
chr1 : 205618957 - 205620838 : ELK4,	2.89601	8.38921	7.51792	7.40397	5.04488	2.23549	4.49269	4.70529	0	10.8283	-0.549275	0.530219	0.999028	chr1	205618957	205620838	-	5	GTAG	GCAAGGTGCTAACACACTTTTCCAG	GACCATTCACTTTTTTGATGATATT	ELK4,
chr3 : 170113360 - 170149244 : PHC3,	0	0	0	2.77649	0	8.94198	0	0	0	4.81258	1.71956	0.530757	0.999028	chr3	170113360	170149244	-	5	GTAG	GAGATGGAAGACATGATTGCTGAAG	GTGTAGGAGAAGTGGAGAGGTTGAT	PHC3,
chr19 : 10163326 - 10177367 : DNMT1,	4.82668	0	10.3371	0	6.3061	0	0	0	0	0	-1.88737	0.532359	0.999028	chr19	10163326	10177367	-	5	GTAG	AGCACAGAAGTCAACCCAAAGATCT	ATCCTGGGGCTAGGTGAAGGTTCAG	DNMT1,
chr14 : 61457679 - 61443111 : PRKCH,	2.89601	0	0	0	0	0	0	3.92108	10.0192	0	1.68435	0.53584	0.999028	chr14	61457679	61443111	+	6	GTAG	GTTGTTCTGCTGCTTTCAGACCCCC	AAGATCCGGTCTCTCTGGAGAGTAG	PRKCH,
chr13 : 19633902 - 19646551 : MPHOSPH8,	5.79201	0	0	6.47848	21.4408	14.9033	0	0	10.0192	0	1.32859	0.536834	0.999028	chr13	19633902	19646551	-	0	ACTC	CGAACACATCCTCTCCGTCCTCCTC	AAGAAAAAGAAAAAATTGAGGCAGA	MPHOSPH8,
chr18 : 13030608 - 12999421 : CEP192,	4.82668	0	0	4.62748	0	6.70648	0	3.92108	12.0231	3.60944	0.890173	0.537853	0.999028	chr18	13030608	12999421	+	6	GTAG	ATGAATGAAGACTTCAGATCTGGTT	TATACCTCGAAAATCTTCCATCTCA	CEP192,
chr9 : 37127263 - 37126312 : ZCCHC7,	7.72268	5.24326	9.3974	5.55298	0	7.45165	4.49269	0	3.00577	13.2346	-0.580799	0.538058	0.999028	chr9	37127263	37126312	+	6	GTAG	CCTCTCTCTCTGCTTGGTACCACAG	TCATAAAAAGTCAGTAACCTTGAAG	ZCCHC7,
chr17 : 20205912 - 20204333 : SPECC1,	12.5494	17.8271	38.5293	19.4354	18.9183	43.9647	26.0576	36.8581	16.0308	12.0315	0.237482	0.539185	0.999028	chr17	20205912	20204333	+	6	GTAG	ACATGTTTCCAGTCTGCTGGCCAAG	GTCCGTTTAGTTGTTGTAAAGGCCC	SPECC1,
chr7 : 158759486 - 158764853 : ESYT2,	8.68802	7.34056	5.63844	9.25497	0	11.1775	0	10.1948	4.0077	6.01573	-0.532279	0.539346	0.999028	chr7	158759486	158764853	-	5	GTAG	CTTGGATTCAGCAAGGAACCTTCCG	CAATAAAATGTATCCTTAGAACACC	ESYT2,
chr6 : 82214227 - 82214829 : IBTK,	6.75735	13.6325	13.1564	8.32947	13.8734	0	4.49269	8.62637	10.0192	12.0315	-0.390035	0.542008	0.999028	chr6	82214227	82214829	-	5	GTAG	TCGACTTCAGTAATTTGAGTAGTAG	GGACACAGCTGGAATTTCATAAAGG	IBTK,
chr1 : 111174963 - 111147642 : CEPT1,	3.86134	0	0	3.70199	0	2.98066	0	0	0	0	-1.81917	0.543483	0.999028	chr1	111174963	111147642	+	6	GTAG	AGGACCACCTTTTTGGCAATCTATG	GTAGGTTTTTGTGGCTGGTGCTTAC	CEPT1,
chr4 : 73078642 - 73092300 : ANKRD17,	0	2.0973	0	2.77649	3.78366	0	2.69561	0	5.00962	4.81258	1.14193	0.543814	0.999028	chr4	73078642	73092300	-	5	GTAG	TTTGAAGGGATTGGTGGCAATCAAG	TTGTCTTGTTGATTCAGTGCCACCC	ANKRD17,
chr15 : 80122800 - 80098416 : ZFAND6,	0	3.14595	5.63844	0	0	3.72582	0	0	0	0	-1.77137	0.544618	0.999028	chr15	80122800	80098416	+	6	GTAG	GTACCTGAAACAGAAGATGTGCAGG	ACTGCAGCAGACTTCAGATTCATTC	ZFAND6,
chr7 : 24668660 - 24623666 : MPP6,	0	0	0	5.55298	0	3.72582	0	0	10.0192	6.01573	1.23392	0.54481	0.999028	chr7	24668660	24623666	+	6	GTAG	ACTAGATTTGGAACTACGGTGCCAT	AGGTTTTCCAAGACTTGCTGCATTG	MPP6,
chr19 : 23358430 - 23362725 : ZNF91,	27.0294	11.5352	9.3974	8.32947	8.82855	11.9226	3.59415	18.037	5.00962	20.4535	-0.316135	0.545272	0.999028	chr19	23358430	23362725	-	5	GTAG	TATTTATGACCTTTTCTATGGAAAG	TCTTGAGGAAAATGAGGACATATAC	ZNF91,
chr6 : 149379518 - 149378018 : TAB2,	0	6.29191	2.81922	4.62748	8.82855	0	6.28976	5.48951	13.025	0	0.704689	0.545821	0.999028	chr6	149379518	149378018	+	6	GTAG	TCTGATGATGCTGCCTACACACAAG	AGCAGGCATCCAGGTTATTATTATT	TAB2,
chr7 : 158906091 - 158879684 : WDR60,	9.65335	0	6.57818	4.62748	0	7.45165	2.69561	7.05794	0	0	-0.823118	0.546805	0.999028	chr7	158906091	158879684	+	6	GTAG	GTCGGACTCAGGCCCTTAAGCAAAA	TGTCCTTGCTGTCTCCGTACTGCAG	WDR60,
chr1 : 155853276 - 155853806 : GON4L,	7.72268	12.5838	21.614	11.106	11.351	9.68714	6.28976	19.6054	6.01154	12.0315	-0.286744	0.552056	0.999028	chr1	155853276	155853806	-	5	GTAG	AGTGAAGAAGTCAAGGAAGAAGGAG	TTAAAAGTCCCACTTTTGTTCCATT	GON4L,
chr1 : 243426558 - 243415702 : SDCCAG8,	0	9.43786	0	0	0	0	0	0	4.0077	0	-1.82062	0.552547	0.999028	chr1	243426558	243415702	+	6	GTAG	GAGTACATGAGACGATGAAGCAAAG	CTGCTGAATGCTATCTTTTTCCTGT	SDCCAG8,
chr14 : 34792775 - 34862322 : BAZ1A,	2.89601	0	2.81922	0	0	0	8.08684	5.48951	5.00962	0	1.12275	0.552784	0.999028	chr14	34792775	34862322	-	5	GTAG	CAACTAACTGATGCTGACACCAAAG	CAGAATGGTTCGTTCAAAAAAGTCA	BAZ1A,
chr5 : 127524920 - 127523460 : PRRC1,	0	9.43786	0	0	0	0	0	3.92108	0	0	-1.81076	0.554628	0.999028	chr5	127524920	127523460	+	6	GTAG	TCATTTTCTGCACCTTCAGGAACAG	ATCATTTTTCTTCAATTATGGTATA	PRRC1,
chr4 : 152411303 - 152412529 : FBXW7,	38.6134	47.1893	56.3844	38.8709	51.7101	59.6132	37.7386	54.8951	44.0846	49.329	0.134991	0.555031	0.999028	chr4	152411303	152412529	-	5	GTAG	CCCATTCTATACAAAAACAACAAAA	GGCAATCTATCCTAAGGAAGTAATC	FBXW7,
chr1 : 117442325 - 117402186 : MAN1A2,	35.7174	27.2649	35.7101	28.6904	46.6652	22.3549	42.2313	10.979	23.0442	24.0629	-0.193309	0.561219	0.999028	chr1	117442325	117402186	+	6	GTAG	CTTGGGCAATGGTGAATTTGAAAAG	ATTTCTCAGACGTTCTTCCTCTTCC	MAN1A2,
chr1 : 151427823 - 151442205 : POGZ,	5.79201	3.14595	6.57818	0	0	0	0	5.48951	0	6.01573	-1.02028	0.564375	0.999028	chr1	151427823	151442205	-	5	GTAG	AGCGGACCTGAGTCTTCAATGAAAG	CATGAACAGGTCGGTGTCCGCCATG	POGZ,
chr14 : 55619312 - 55612019 : KTN1,	0	3.14595	5.63844	5.55298	0	5.21615	0	0	5.00962	0	-1.0515	0.568026	0.999028	chr14	55619312	55612019	+	6	GTAG	TGTAATACAAGATGCTTTAAAGAAG	TTTTGTCAATGTGATCCTATAAAAC	KTN1,
chr6 : 75711416 - 75702645 : SENP6,	0	4.19461	3.75896	9.25497	7.56733	2.23549	8.08684	2.35265	11.0212	6.01573	0.512095	0.569985	0.999028	chr6	75711416	75702645	+	6	GTAG	ATTTAAAGCCTACTATCTGTAAACA	AACAACAGCCAAAAACCAGTGTGCA	SENP6,
chr12 : 46229153 - 46243314 : SLC38A1,	16.4107	12.5838	13.1564	18.5099	12.6122	3.72582	8.08684	17.2527	21.0404	14.4377	-0.253579	0.573626	0.999028	chr12	46229153	46243314	-	5	GTAG	CAAACACTGGAATCCTACTTTTTCT	CACACAGTAGACACTCAATAAATAT	SLC38A1,
chr4 : 53444103 - 53414615 : FIP1L1,	0	0	0	7.40397	7.56733	0	3.59415	7.84216	3.00577	0	0.975588	0.574321	0.999028	chr4	53444103	53414615	+	6	GTAG	GCACGTGCATTTCCATATGGCAATG	CTGAGACTGAGAAGAAGTGCTGTTT	FIP1L1,
chr8 : 38347497 - 38348215 : WHSC1L1,	3.86134	5.24326	6.57818	12.0315	0	9.68714	16.1737	8.62637	7.01347	12.0315	0.374776	0.576422	0.999028	chr8	38347497	38348215	-	5	GTAG	CAAATTAGAACCAGAGGAACAAAAT	TAACTTTCCCTTTCTCTCATCGGGC	WHSC1L1,
chr4 : 48379848 - 48369849 : SLAIN2,	14.48	0	8.45766	0	5.04488	0	0	3.92108	7.01347	0	-1.11282	0.577172	0.999028	chr4	48379848	48369849	+	6	GTAG	ATTCTAGCCCGGATGCAGGAAGAAA	TTTTTTCTTTGGTGATGAATACAGC	SLAIN2,
chr9 : 5968019 - 5988545 : KIAA2026,	14.48	7.34056	9.3974	12.957	10.0898	9.68714	6.28976	13.3317	10.0192	4.81258	-0.279012	0.578263	0.999028	chr9	5968019	5988545	-	5	GTAG	GCAAAACACAAGAAGCACAAATCTG	TATCGTTGTCTTTTCTCTCAAGTGC	KIAA2026,
chr2 : 73455295 - 73432198 : ALMS1,	4.82668	6.29191	5.63844	0	0	2.98066	4.49269	10.979	13.025	4.81258	0.546531	0.579362	0.999028	chr2	73455295	73432198	+	6	GTAG	TGGAAGAACAACTGACTTGTCCAAG	AGTGATATTCCGACTCTCTTGTTGG	ALMS1,
chr14 : 96860735 - 96833467 : VRK1,	3.86134	11.5352	13.1564	5.55298	0	10.4323	10.7824	0	5.00962	10.8283	-0.457446	0.583905	0.999028	chr14	96860735	96833467	+	6	GTAG	TTTGAAAGCAAAAACAATAACAAAG	GCTGCTTTTACACGAGGCATTTTCA	VRK1,
chr5 : 109729513 - 109713520 : MAN2A1,	3.86134	8.38921	0	5.55298	0	2.98066	3.59415	2.35265	7.01347	0	-0.720302	0.585203	0.999028	chr5	109729513	109713520	+	6	GTAG	TTCAGAAGAAGGATGCTGTTAAAAG	TTTCTTGCAACATTGAGAGCTGGCC	MAN2A1,
chr11 : 118482495 - 118481715 : KMT2A,	7.72268	0	0	0	6.3061	4.47099	8.98537	2.35265	0	0	0.934847	0.586685	0.999028	chr11	118482495	118481715	+	6	GTAG	TGTAAAACAAAAACCAAAAGAAAAG	GACTTTTTCTCTTTCTTTTTCACAG	KMT2A,
chr15 : 76728595 - 76765638 : SCAPER,	0	4.19461	0	6.47848	0	0	0	0	0	6.01573	-1.44974	0.588582	0.999028	chr15	76728595	76765638	-	5	GTAG	AGGATGCAGCCCGGGAAAGAGCTAG	AAACACTCCCACTGCCCATGCTGGC	SCAPER,
chr13 : 42953948 - 42970670 : EPSTI1,	0	0	0	4.62748	7.56733	2.23549	0	6.27373	0	0	1.20066	0.592678	0.999028	chr13	42953948	42970670	-	5	GTAG	AAGCATTTAGAGAGCATCAGCAATA	TGCTATCAAGGTGTATGCACTTGTG	EPSTI1,
chr4 : 143543972 - 143543509 : SMARCA5,	0	0	6.57818	3.70199	0	0	0	5.48951	0	0	-1.45888	0.593133	0.999028	chr4	143543972	143543509	+	6	GTAG	AGAAGACTATAGAGAAAAACAAAAG	TTCAGATTCTGATCCACAAGCCTCC	SMARCA5,
chr12 : 28307749 - 28255581 : CCDC91,	0	6.29191	0	2.77649	0	2.98066	6.28976	3.13686	4.0077	6.01573	0.736548	0.594043	0.999028	chr12	28307749	28255581	+	6	GTAG	TCAAGATAGATACAAAGAACTTCAG	TAAGCAGGTCATCCACGTATAGCAC	CCDC91,
chr11 : 65502944 - 65503402 : AP000769.1,	7.72268	3.14595	0	0	6.3061	0	0	0	0	0	-1.41548	0.594058	0.999028	chr11	65502944	65503402	-	3	CTGC	AGCAGTATTTTGAGATGGACATTGC	ATGGGATAGTACACTTCACTCAGAG	AP000769.1,
chr15 : 93009323 - 93000512 : CHD2,	9.65335	22.0217	13.1564	6.47848	23.9632	13.413	8.08684	8.62637	22.0423	15.6409	0.240602	0.59642	0.999028	chr15	93009323	93000512	+	6	GTAG	AGGAGCACATCAAACTCTGGAGGAG	GAGGCTTCCGCTTCTTTAATTTGGC	CHD2,
chr9 : 85575315 - 85596449 : AGTPBP1,	0	0	2.81922	0	0	7.45165	4.49269	0	0	0	1.50622	0.597293	0.999028	chr9	85575315	85596449	-	5	GTAG	TTGAATCAAGCTGCAAAGTAACTAG	ACCGAATACATGAGTGGTTGCATAC	AGTPBP1,
chr10 : 15816835 - 15847943 : FAM188A,	0	9.43786	5.63844	2.77649	0	0	3.59415	0	11.0212	0	-0.870744	0.599045	0.999028	chr10	15816835	15847943	-	5	GTAG	TCACCTCACCGTATTTTTTGCCAAG	CCCTCTGATTCACTAAACACAAACC	FAM188A,
chr20 : 51432067 - 51435761 : NFATC2,	7.72268	3.14595	0	8.32947	6.3061	0	0	3.13686	8.01539	0	-0.73855	0.604244	0.999028	chr20	51432067	51435761	-	5	GTAG	TTGGACCAGACCTACTTGGATGATG	TCCATCTCCCAAATTTGCTGTCCAT	NFATC2,
chr11 : 108235834 - 108227595 : ATM,	0	15.7298	10.3371	5.55298	8.82855	0	11.681	4.70529	2.00385	7.21887	-0.473932	0.605058	0.999028	chr11	108235834	108227595	+	6	GTAG	GAAATATCTCAGCAACAGTGGTTAG	ACAATTTCAGAACACACATCACTGT	ATM,
chr2 : 195683906 - 195680032 : SLC39A10,	0	5.24326	6.57818	2.77649	8.82855	5.21615	5.39122	7.05794	5.00962	0	0.530772	0.605354	0.999028	chr2	195683906	195680032	+	6	GTAG	GATGAGGCAAATATAGGGGCATCAG	ATATGTACCTTCATTTCTATTTTTC	SLC39A10,
chr9 : 36351115 - 36357942 : RNF38,	5.79201	0	2.81922	0	0	4.47099	0	0	0	0	-1.48799	0.607823	0.999028	chr9	36351115	36357942	-	5	GTAG	AGATGGAGAAGTAGAAAATTACGAG	AAACAGGGACTGTTCCTTGATGGAG	RNF38,
chr12 : 28307749 - 28305649 : CCDC91,	6.75735	6.29191	3.75896	4.62748	11.351	0	5.39122	4.70529	0	0	-0.602718	0.612422	0.999028	chr12	28307749	28305649	+	6	GTAG	TCAAGATAGATACAAAGAACTTCAG	GATGGTGAAAGATGGACTCCAGATA	CCDC91,
chr6 : 158589782 - 158573420 : TMEM181,	9.65335	0	2.81922	3.70199	0	2.23549	6.28976	3.13686	3.00577	0	-0.702367	0.612953	0.999028	chr6	158589782	158573420	+	6	GTAG	CCCCATCAAGGGAATGAACTTCACA	CGTGTAGAGCCGCATGGGCGCCAGC	TMEM181,
chr10 : 11997672 - 12014184 : UPF2,	0	0	0	2.77649	0	0	0	5.48951	0	6.01573	1.45514	0.614449	0.999028	chr10	11997672	12014184	-	5	GTAG	CACTCTTCATAGTTCCTAGACAAAG	CTCCCCTTTAGAATGTAGAATGCGC	UPF2,
chr1 : 52509596 - 52526373 : ZCCHC11,	0	4.19461	0	4.62748	5.04488	0	0	0	0	0	-1.43998	0.615772	0.999028	chr1	52509596	52526373	-	5	GTAG	GAAACGACATAAGAAAAATATTTTG	TTCAAGTCCAGTTTAGGCAAGCAAA	ZCCHC11,
chr11 : 65502964 - 65503421 : AP000769.1,	2.89601	0	0	0	5.04488	6.70648	0	0	0	0	1.43628	0.616253	0.999028	chr11	65502964	65503421	-	0	TAAT	TTTTATTCTGCTTTTGTAAAAGCAG	TCAGAGGCATTTGCATCTTTAAATA	AP000769.1,
chr15 : 41669958 - 41668828 : MGA,	2.89601	5.24326	4.6987	6.47848	0	8.19681	5.39122	4.70529	0	0	-0.618819	0.616542	0.999028	chr15	41669958	41668828	+	6	GTAG	AATTGAAGCAAGAGATTTCTGAATG	ACATAGTCACAATGGCCTTCCCATC	MGA,
chr14 : 73103335 - 73106039 : RBM25,	0	0	0	7.40397	0	3.72582	0	0	0	0	-1.53291	0.618446	0.999028	chr14	73103335	73106039	-	0	TTAG	TCGTTCCCGCTCCCGTTCTTTCTCC	AGAAGATGCATACGAACGAAGAAAA	RBM25,
chr3 : 170136419 - 170149244 : PHC3,	2.89601	4.19461	6.57818	4.62748	12.6122	0	8.98537	5.48951	7.01347	3.60944	0.437979	0.618529	0.999028	chr3	170136419	170149244	-	5	GTAG	AGTATTCACCAGTTAATAGCACCAG	GTGTAGGAGAAGTGGAGAGGTTGAT	PHC3,
chr4 : 128028853 - 128017363 : ABHD18,	0	3.14595	7.51792	6.47848	0	2.98066	5.39122	0	7.01347	0	-0.729763	0.621882	0.999028	chr4	128028853	128017363	+	6	GTAG	TGTACTCATGTAGCAAATTTCTCAG	GGACACATTTTTTAAGCTGGACCTT	ABHD18,
chr7 : 135393918 - 135398226 : CNOT4,	0	0	9.3974	0	0	3.72582	0	1.56843	0	0	-1.37759	0.625485	0.999028	chr7	135393918	135398226	-	5	GTAG	GGTCTGGGAGGGATCCCTGTAGCAG	AGAATCTGAAGGTTTGTCAATGGGG	CNOT4,
chr4 : 109463644 - 109462901 : SEC24B,	3.86134	0	6.57818	0	0	2.23549	0	0	0	4.81258	-1.16685	0.62553	0.999028	chr4	109463644	109462901	+	6	GTAG	GCGAACAACAACCCAACCATTACTG	ACCTGCATTTGATTCTGGGCTGGAC	SEC24B,
chr1 : 117405645 - 117402186 : MAN1A2,	0	0	5.63844	3.70199	0	0	5.39122	0	0	0	-1.36693	0.62616	0.999028	chr1	117405645	117402186	+	6	GTAG	AAAGGACACTCCCCTAACATATTTG	ATTTCTCAGACGTTCTTCCTCTTCC	MAN1A2,
chr5 : 80202886 - 80205360 : SERINC5,	0	0	4.6987	0	0	8.94198	0	0	0	7.21887	1.19475	0.626504	0.999028	chr5	80202886	80205360	-	5	GTAG	CGTGGCTCACAAGATGAAAGAGCAC	ACCTCGGACAACATGACCATCAACC	SERINC5,
chr12 : 122377389 - 122380558 : CLIP1,	3.86134	0	0	2.77649	0	0	3.59415	0	0	0	-1.44829	0.630796	0.999028	chr12	122377389	122380558	-	5	GTAG	GCTCAAAATCGGAGACAGAGTATTG	AGTGAAGTCAGTCTCTGGATTAAAT	CLIP1,
chr21 : 29329693 - 29326059 : BACH1,	3.86134	0	0	0	3.78366	2.23549	0	0	0	7.21887	1.17585	0.633009	0.999028	chr21	29329693	29326059	+	6	GTAG	TCTTGAATCAGAAATTGAGAAGCTG	AAGGTTCAAATCCTTTAACTGTCAC	BACH1,
chr14 : 22906195 - 22911403 : RBM23,	3.86134	0	0	0	6.3061	7.45165	0	0	0	0	1.24753	0.638278	0.999028	chr14	22906195	22911403	-	5	GTAG	ACAGGAGTCCTCCACTTGCCACTGG	GTCATCAGATGCCATCCTGTCAGAT	RBM23,
chr4 : 73090667 - 73092300 : ANKRD17,	30.8907	31.4595	37.5896	38.8709	31.5305	26.0808	38.6371	26.6633	34.0654	36.0944	-0.119632	0.640983	0.999028	chr4	73090667	73092300	-	5	GTAG	CAGAGACCTGCTCCAAGTCCCTCAG	TTGTCTTGTTGATTCAGTGCCACCC	ANKRD17,
chr1 : 35470863 - 35479212 : KIAA0319L,	2.89601	0	0	5.55298	0	0	0	0	5.00962	0	-1.3454	0.641513	0.999028	chr1	35470863	35479212	-	5	GTAG	TTCCCAGATCCTCAAACTATCGAAG	TGGAAATTGTAATCGCCTTGTGGAC	KIAA0319L,
chr2 : 207742342 - 207724800 : CCNYL1,	6.75735	10.4865	0	0	0	9.68714	0	0	0	0	-1.3957	0.641711	0.999028	chr2	207742342	207724800	+	6	GTAG	AGCTGAATGTGCAATAGTAACTTTG	GAAGGGTTTGACTCCAAAGCTAAAT	CCNYL1,
chr8 : 66572482 - 66580366 : MYBL1,	0	4.19461	2.81922	0	0	0	0	3.92108	0	0	-1.38242	0.644475	0.999028	chr8	66572482	66580366	-	5	GTAG	AAAATATGGACCTCTTAAAATTGTG	ACCAGCTAGAAAAACTTCCAGGCTG	MYBL1,
chr9 : 33960826 - 34017189 : UBAP2,	0	0	0	2.77649	0	0	0	4.70529	0	6.01573	1.3521	0.644839	0.999028	chr9	33960826	34017189	-	5	GTAG	GACAACAGAAGACTGGACTGAAGAT	ATAATGTATGTACAAAATAGAAAAT	UBAP2,
chr7 : 30550636 - 30574881 : AC005154.6,RP4-777O23.3,AC005154.6,	0	9.43786	0	11.106	7.56733	0	0	6.27373	0	2.40629	-0.932104	0.645845	0.999028	chr7	30550636	30574881	-	5	GTAG	CAGTAACCCTGTGTTCTATCCACAG	GGCTTCAGTTATTGCAGGCTGGACC	AC005154.6,RP4-777O23.3,AC005154.6,
chr10 : 101798842 - 101800400 : MGEA5,	4.82668	0	0	3.70199	3.78366	18.6291	0	0	0	2.40629	0.96134	0.646014	0.999028	chr10	101798842	101800400	-	5	GTAG	TTGCAAAGGAAAAGACTCTGAAAAA	GACACAGTACTATCTTCACTGTCAG	MGEA5,
chr14 : 21503173 - 21503881 : METTL3,	3.86134	0	0	2.77649	3.78366	0	4.49269	0	10.0192	0	0.867499	0.646021	0.999028	chr14	21503173	21503881	-	5	GTAG	CACTAAGGAACAACAGAGCAAGAAG	AATGCTGCCTCTGGATTCCGTAGAT	METTL3,
chr18 : 47865059 - 47896809 : SMAD2,	2.89601	5.24326	0	0	0	0	0	4.70529	0	0	-1.33762	0.646723	0.999028	chr18	47865059	47896809	-	5	GTAG	CAGTTGAATCAAAGTATGGACACAG	AGGAAAACAGCCTCTTGTATCGAAC	SMAD2,
chr5 : 139623461 - 139600372 : UBE2D2,	2.89601	10.4865	3.75896	0	0	0	8.08684	0	7.01347	0	-0.757944	0.648095	0.999028	chr5	139623461	139600372	+	6	GTAG	GGATCTACAAAACAGATAGAGAAAA	GGTCCCGTGCCAGATCATTCAATTC	UBE2D2,
chr1 : 84197824 - 84179177 : PRKACB,	0	0	0	8.32947	0	0	0	4.70529	0	0	-1.38036	0.651461	0.999028	chr1	84197824	84179177	+	6	GTAG	GGCTCCAGAAATAATTCTCAGCAAG	TTGGCTTTGGCTAGAAACTCTTTCA	PRKACB,
chr14 : 91797785 - 91813825 : TC2N,	0	5.24326	0	4.62748	0	2.98066	12.5795	0	12.0231	0	0.903873	0.653508	0.999028	chr14	91797785	91813825	-	5	GTAG	ATCTTCAGCCAAGGAAGGTTCCAAC	ACAAACTTCCAATCTTAATATTAAT	TC2N,
chr14 : 65455718 - 65430216 : FUT8,	0	6.29191	3.75896	0	0	7.45165	0	7.84216	9.01731	0	0.712258	0.656818	0.999028	chr14	65455718	65430216	+	6	GTAG	TTGTTGATTAACTGGACAAATTCAG	TGGGCAACACAGAGAAACCCTGTCT	FUT8,
chr5 : 79669028 - 79640851 : PAPD4,	4.82668	3.14595	7.51792	2.77649	0	5.21615	3.59415	2.35265	5.00962	3.60944	-0.453472	0.659611	0.999028	chr5	79669028	79640851	+	6	GTAG	TTAAATATTATGCTACAGAATTTGA	ATAACTCCAGTATCTGCTGACTCAA	PAPD4,
chr11 : 77698487 - 77702495 : RSF1,	0	0	3.75896	5.55298	0	3.72582	2.69561	0	0	0	-1.09423	0.660053	0.999028	chr11	77698487	77702495	-	5	GTAG	TGGCCTTCCAAACCATCCTGAGCTA	ATCTTTTCACTTTCTTTCTGTTCCT	RSF1,
chr18 : 56939393 - 56923922 : WDR7,	5.79201	0	5.63844	0	0	0	0	3.92108	0	4.81258	-0.980017	0.661708	0.999028	chr18	56939393	56923922	+	6	GTAG	AAGAATGTTTCCCAGCCATCTGCAG	AGCAGAAGAAACGTCAGTGCCTTGC	WDR7,
chr6 : 144488834 - 144482209 : UTRN,	0	0	0	2.77649	5.04488	5.21615	0	0	0	0	1.2908	0.66239	0.999028	chr6	144488834	144482209	+	6	GTAG	TTTCCAAGTTCCACAGGAAGCTCAG	TCTGCAACACATCCTCTTTTGCCCT	UTRN,
chr15 : 63511292 - 63511957 : USP3,	0	0	5.63844	0	0	0	0	3.13686	0	0	-1.34901	0.663546	0.999028	chr15	63511292	63511957	-	0	TAAA	AGCATTAAGTTACTGAATAACAAAA	TAAAACTAGTAACTGCAGATCTTTT	USP3,
chr8 : 38337305 - 38348215 : WHSC1L1,	3.86134	0	2.81922	0	6.3061	2.23549	0	5.48951	3.00577	0	0.760507	0.663709	0.999028	chr8	38337305	38348215	-	5	GTAG	GTTCATACTAAAATTAACACAAGAG	TAACTTTCCCTTTCTCTCATCGGGC	WHSC1L1,
chr11 : 121060085 - 121045674 : TBCEL,	0	4.19461	5.63844	0	0	2.23549	0	4.70529	0	0	-1.04998	0.66512	0.999028	chr11	121060085	121045674	+	6	GTAG	TTCCACAGGAAGAAGTGCCATTCAG	TGATCCATCTTTCTTTCTTAAAATG	TBCEL,
chr22 : 21805850 - 21807846 : MAPK1,	3.86134	3.14595	0	7.40397	0	4.47099	6.28976	2.35265	0	0	-0.689415	0.665617	0.999028	chr22	21805850	21807846	-	5	GTAG	GCTCAACACCACCTGTGATCTCAAG	TTTGTTGACATTATCATAAGCAGAG	MAPK1,
chr10 : 98163397 - 98156093 : R3HCC1L,	0	0	2.81922	0	5.04488	5.21615	0	0	0	0	1.27167	0.666826	0.999028	chr10	98163397	98156093	+	6	GTAG	TAAGAAAATAAATGTTACTTACATG	TTCAATAGTAGGACACTGGAAGTCT	R3HCC1L,
chr2 : 32116212 - 32098796 : SPAST,	0	4.19461	6.57818	2.77649	0	2.98066	6.28976	0	3.00577	0	-0.707572	0.668393	0.999028	chr2	32116212	32098796	+	6	GTAG	TATTCTTCCTTCTCTGAGGCCTGAG	AATGGCAAAACTGGTTGCATCTTCT	SPAST,
chr12 : 42398994 - 42384940 : PPHLN1,	0	0	0	5.55298	0	0	0	3.13686	0	0	-1.3284	0.668461	0.999028	chr12	42398994	42384940	+	6	GTAG	ATCAAAAACCAAAGAGATTGAACAG	TAGGAGGCACCAGGACGCACGGACT	PPHLN1,
chr2 : 231460826 - 231461843 : NCL,	0	0	3.75896	2.77649	0	0	0	3.92108	0	0	-1.28672	0.668724	0.999028	chr2	231460826	231461843	-	0	AACA	TATGGAGACTACACCAGCCAAAGGA	CTCCCTTCTTGCCAGGTGTGGTAAC	NCL,
chr6 : 158314268 - 158312051 : TULP4,	1.93067	8.38921	2.81922	5.55298	6.3061	5.96132	5.39122	6.27373	12.0231	0	0.372993	0.669058	0.999028	chr6	158314268	158312051	+	6	GTAG	CAACCTCCGGGGCCACAATAGCGAG	TGGGAGGCCCTGGAGTCTTACAAAT	TULP4,
chr12 : 10386903 - 10393867 : KLRK1,KLRC4-KLRK1,	4.82668	0	2.81922	0	0	0	0	4.70529	0	0	-1.25257	0.670104	0.999028	chr12	10386903	10393867	-	5	GTAG	GTCAAAAGCAAATGTAGAGAAAATG	TTTCTCCTTCCTTTATCCCCAGTAG	KLRK1,KLRC4-KLRK1,
chr6 : 82212707 - 82214829 : IBTK,	2.89601	0	0	0	0	0	0	6.27373	4.0077	0	1.25194	0.670814	0.999028	chr6	82212707	82214829	-	5	GTAG	AACTGAAGCTAAGTCAGAAAAAATG	GGACACAGCTGGAATTTCATAAAGG	IBTK,
chr9 : 121166180 - 121161856 : CNTRL,	9.65335	8.38921	8.45766	0	7.56733	7.45165	0	5.48951	5.00962	4.81258	-0.390403	0.672255	0.999028	chr9	121166180	121161856	+	6	GTAG	AGACCATTTGAACCTAGCAAAACAG	AACATGTCCAGAATATTCTTTAGTT	CNTRL,
chr1 : 198700812 - 198701285 : PTPRC,	6.75735	6.29191	0	0	0	0	8.08684	0	0	0	-1.26565	0.674432	0.999028	chr1	198700812	198701285	-	0	TTCA	CTCTCAGTGGTGGTTATGGACGGCA	GTATGTGTGAAATTATAGACTGTAC	PTPRC,
chr9 : 20413721 - 20414425 : MLLT3,	0	3.14595	5.63844	11.106	0	0	0	0	6.01154	10.8283	-0.84274	0.676361	0.999028	chr9	20413721	20414425	-	5	GTAG	GGAGAATATATCCTCTAAATCTGAT	TGGTATGAATACTCCTATTAGGGTC	MLLT3,
chr9 : 33944365 - 33948587 : UBAP2,	0	5.24326	0	7.40397	0	0	3.59415	2.35265	5.00962	0	-0.78075	0.680668	0.999028	chr9	33944365	33948587	-	5	GTAG	GCGGCGGATACCCCCAGCTTCTAAG	CAAATCCTGAGCCAAGGACGGATGA	UBAP2,
chr9 : 36352742 - 36357942 : RNF38,	0	6.29191	4.6987	0	0	0	0	0	8.01539	0	-1.04134	0.681451	0.999028	chr9	36352742	36357942	-	5	GTAG	ATCCCAGCTTACTGCCATATGTGTT	AAACAGGGACTGTTCCTTGATGGAG	RNF38,
chrX : 118590302 - 118584735 : DOCK11,	0	8.38921	2.81922	0	3.78366	7.45165	0	0	8.01539	6.01573	0.593969	0.682669	0.999028	chrX	118590302	118584735	+	6	GTAG	CCAAAATCCAGAGTTCTATGATGAG	GCCTTGAGTATCTTTGAAAATGGGT	DOCK11,
chr10 : 16486617 - 16484337 : PTER,	7.72268	0	5.63844	4.62748	5.04488	2.23549	0	4.70529	7.01347	0	-0.511145	0.686885	0.999028	chr10	16486617	16484337	+	6	GTAG	AAACAGTCATGTCACACCTGGATAG	GTTCTAAAAAGAGGATTTCTTTTTT	PTER,
chr4 : 17804404 - 17805225 : DCAF16,	0	0	2.81922	0	0	0	0	0	5.00962	4.81258	1.19919	0.687554	0.999028	chr4	17804404	17805225	-	5	GTAG	GGAGATACTCTGACCTGTGCCAGTG	GATCCTATCACCAATTCTATATAAG	DCAF16,
chr4 : 147634581 - 147633765 : TMEM184C,	1.93067	3.14595	0	0	7.56733	0	0	2.35265	4.0077	0	0.865798	0.687612	0.999028	chr4	147634581	147633765	+	6	GTAG	AGGTACAACTACTGCATTTATATAT	ACATCTCAATACAGATAATAAAATC	TMEM184C,
chr15 : 75411492 - 75414311 : SIN3A,	4.82668	0	0	11.106	0	2.23549	8.08684	2.35265	3.00577	18.0472	0.478597	0.688172	0.999028	chr15	75411492	75414311	-	5	GTAG	CCTGGAGATTTTGCACACATATCAG	CAAGATAAGATAGCGCATCCTCCAC	SIN3A,
chr21 : 31700995 - 31705467 : SCAF4,	0	3.14595	8.45766	5.55298	0	5.21615	5.39122	6.27373	0	0	-0.575507	0.688912	0.999028	chr21	31700995	31705467	-	5	GTAG	TGAACAGAAAACTGCATTTGACAAG	CTATTTGAACTACATGCTTATAAAG	SCAF4,
chr2 : 71418639 - 71396141 : ZNF638,	0	4.19461	2.81922	7.40397	3.78366	0	5.39122	2.35265	3.00577	0	-0.57804	0.688943	0.999028	chr2	71418639	71396141	+	6	GTAG	ATGACCCAGAATTAGAAAAAGAAAG	GATGCCTTGGCTTGTCCAGTTTTGG	ZNF638,
chr6 : 47612536 - 47595861 : CD2AP,	0	6.29191	0	0	0	0	0	0	4.0077	0	-1.23347	0.689074	0.999028	chr6	47612536	47595861	+	6	GTAG	GAAGACAATGAGAAGTAATCTAGAG	TTCTGTTCCAGTGTTGATTTTTCAT	CD2AP,
chr5 : 57246300 - 57251141 : GPBP1,	12.5494	16.7784	33.8306	9.25497	16.3959	19.3743	17.9707	28.2318	21.0404	16.844	0.151723	0.689857	0.999028	chr5	57246300	57251141	-	3	CTGC	CTAGATTTAGGATTCGGAGGATATT	CAAGTTCACTTGAGGCAGAACACAG	GPBP1,
chr6 : 18236452 - 18258405 : DEK,	7.72268	0	0	0	0	0	0	0	5.00962	0	-1.21332	0.691374	0.999028	chr6	18236452	18258405	-	5	GTAG	CACAATGAAACAGATTTGCAAAAAG	TTGCCTTCCACGATGAGACTCTTTT	DEK,
chr21 : 15766141 - 15762891 : USP25,	0	0	2.81922	6.47848	7.56733	5.21615	1.79707	0	7.01347	0	0.616238	0.692178	0.999028	chr21	15766141	15762891	+	6	GTAG	AGTGTGGGAAGCCAAGCAGATACAA	GTTGATTCAAAAACGTCTGCTGGTG	USP25,
chr1 : 155921375 - 155923687 : KIAA0907,	5.79201	0	0	0	10.0898	9.68714	0	0	0	0	1.18522	0.694775	0.999028	chr1	155921375	155923687	-	5	GTAG	GCAGCCTCCAGCTAGCACTGGACAG	AGCCAGGCCTTCTGGTTTGGGGTGA	KIAA0907,
chr7 : 105077433 - 105073619 : KMT2E,	0	0	5.63844	0	0	0	3.59415	0	0	0	-1.21447	0.694814	0.999028	chr7	105077433	105073619	+	6	GTAG	AAGCAAATGGGTATTTCTTTAAAAG	CACTGCCCTCTCTTTATCCAAATTC	KMT2E,
chr19 : 21424644 - 21425451 : ZNF493,	0	0	11.2769	0	0	0	3.59415	0	5.00962	0	-0.974696	0.695911	0.999028	chr19	21424644	21425451	-	1	ATAC	GAGAATATACTAAAGGCTTTGCCAC	GATAAATTATACAAATGTGAAGAAT	ZNF493,
chr5 : 71512428 - 71502599 : BDP1,	0	0	0	5.55298	0	0	3.59415	0	0	0	-1.19386	0.699816	0.999028	chr5	71512428	71502599	+	6	GTAG	AGCAGTTTTCAGATATTAATTTAAG	CTGCAGACAATTTTTTTCACCCAAA	BDP1,
chr20 : 35713019 - 35725155 : RBM39,	7.72268	0	0	2.77649	0	0	4.49269	0	4.0077	0	-0.885999	0.701395	0.999028	chr20	35713019	35725155	-	5	GTAG	TCTTTGGCATTTGGTGCTGTGGCAG	AGGAGTTAAATTATCAATAGGTTCT	RBM39,
chr2 : 207976651 - 207977586 : PLEKHM3,	4.82668	0	4.6987	0	10.0898	0	5.39122	0	7.01347	0	0.637865	0.703232	0.999028	chr2	207976651	207977586	-	5	GTAG	ACTGCTCAGAGTTTCAAATGTGCAG	ATGTTTGGGAATGTCTGCTTGTGTT	PLEKHM3,
chr1 : 51402435 - 51408332 : EPS15,	0	7.34056	0	0	5.04488	0	0	0	0	0	-1.16414	0.703632	0.999028	chr1	51402435	51408332	-	5	GTAG	TTCCAGTCTGATCCTTTTGTTGGCA	TTAATTCAGCTTTCAGAGAAGAGAT	EPS15,
chr16 : 53157541 - 53154447 : CHD9,	0	0	5.63844	7.40397	3.78366	2.23549	0	3.13686	0	3.60944	-0.632118	0.70444	0.999028	chr16	53157541	53154447	+	6	GTAG	AAATCACCTATGTTTACAGCGACAG	CACAAAGCTCCTTAATATTAGGGAC	CHD9,
chr13 : 79370945 - 79371930 : RBM26,	4.82668	0	0	0	0	2.98066	0	0	0	0	-1.17166	0.706623	0.999028	chr13	79370945	79371930	-	5	GTAG	AGCAGAAGCAGAACACGAAGCAGGG	TCTCTCGCTCTTCCTCCTTAGTGAT	RBM26,
chr7 : 33388144 - 33349068 : BBS9,	0	0	5.63844	5.55298	0	0	5.39122	0	4.0077	0	-0.834562	0.706827	0.999028	chr7	33388144	33349068	+	6	GTAG	CTTGTTAGATGGAACCTACAAGCAG	ATATCACTCTGTTCTGCAGTGTGAC	BBS9,
chr3 : 185613408 - 185598412 : SENP2,	0	0	3.75896	0	3.78366	0	0	2.35265	5.00962	0	0.970867	0.707534	0.999028	chr3	185613408	185598412	+	6	GTAG	CGGAATCAGATTTGAAAATGAAAGT	TTTTTCACTTGGTGAATAAAGCAAT	SENP2,
chr15 : 75409836 - 75413045 : SIN3A,	0	0	3.75896	3.70199	5.04488	5.96132	0	0	3.00577	3.60944	0.639513	0.707585	0.999028	chr15	75409836	75413045	-	5	GTAG	TACAGGAACCACCCCTCCAGTTAAG	ACTAATCACTCCTGGGGTGTCGATG	SIN3A,
chr1 : 151427823 - 151430841 : POGZ,	5.79201	0	13.1564	7.40397	0	18.6291	0	0	4.0077	0	-0.791526	0.707647	0.999028	chr1	151427823	151430841	-	5	GTAG	AGCGGACCTGAGTCTTCAATGAAAG	CCTTGCTGGACCAAAGGATTGCCAG	POGZ,
chr2 : 105857765 - 105858268 : NCK2,	6.75735	0	0	0	0	0	0	0	0	4.81258	-1.11139	0.717048	0.999028	chr2	105857765	105858268	-	0	AACA	TCCAGGTGAGCATGATAAAGAGATC	ACTGACCACGGTTTGTTTTTGTTTT	NCK2,
chr3 : 71684572 - 71710484 : EIF4E3,	0	0	0	5.55298	0	3.72582	0	0	0	0	-1.11889	0.717491	0.999028	chr3	71684572	71710484	-	5	GTAG	CGAAGCCGATGCTGGTCAATTTAGA	AGCTGCTGTGGCACCAGGGAGGGAT	EIF4E3,
chr12 : 123345258 - 123350441 : SBNO1,	0	0	3.75896	5.55298	0	0	3.59415	0	4.0077	0	-0.877151	0.717555	0.999028	chr12	123345258	123350441	-	5	GTAG	GCTCAGCCAGTAGCAACAGCAGCTA	GTAAATCTTGCCCTGGCTCCACCAT	SBNO1,
chr12 : 28259442 - 28255581 : CCDC91,	0	9.43786	0	4.62748	0	0	2.69561	7.05794	0	3.60944	-0.643997	0.717802	0.999028	chr12	28259442	28255581	+	6	GTAG	ATTCCTTGGGCTGCCTTTCCTGCAG	TAAGCAGGTCATCCACGTATAGCAC	CCDC91,
chr20 : 35653528 - 35659014 : RBM12,CPNE1,	5.79201	0	6.57818	2.77649	0	5.96132	5.39122	12.5475	6.01154	0	0.417379	0.719071	0.999028	chr20	35653528	35659014	-	5	GTAG	CAGTTTAAAAATGAAGATGATGCAC	CAACCAATTAAAACCAACTTTTAGA	RBM12,CPNE1,
chr8 : 67287955 - 67302466 : ARFGEF1,	2.89601	0	1.87948	3.70199	0	0	0	3.13686	4.0077	0	-0.82091	0.719706	0.999028	chr8	67287955	67302466	-	5	GTAG	GAAATGGTGAACATTGTTGTTGGAG	TTTTCAGTTTCCGCTTTTATTTCCT	ARFGEF1,
chr9 : 131147584 - 131135940 : NUP214,	4.82668	0	0	0	0	5.21615	0	4.70529	3.00577	0	0.852461	0.721176	0.999028	chr9	131147584	131135940	+	6	GTAG	AGCGGCAAAGCCAGGCTCTCCCCAG	CGCAGATGCTGCCAGCACTAAATCC	NUP214,
chr5 : 50399107 - 50411383 : EMB,	0	3.14595	11.2769	5.55298	7.56733	2.98066	8.08684	14.1159	5.00962	0	0.340522	0.722164	0.999028	chr5	50399107	50411383	-	5	GTAG	TCAACGATATATGTCAGATCTAAAG	TTTTCTACTGGCATACTAGAATGTT	EMB,
chr11 : 76528466 - 76496215 : EMSY,	0	6.29191	0	0	0	7.45165	0	2.35265	0	6.01573	0.764318	0.725117	0.999028	chr11	76528466	76496215	+	6	GTAG	ACAGAGTCCTCCCAGAGTTCCCAAG	ATTTTGATTGCTGATGTAGATACAC	EMSY,
chr18 : 46890580 - 46903635 : PIAS2,	0	0	0	3.70199	0	0	0	3.92108	3.00577	3.60944	0.914741	0.727147	0.999028	chr18	46890580	46903635	-	5	GTAG	GTTCTCATCAAGCCCACGAGTTTAG	AGGGATGTAAAATGGTACAGCCACT	PIAS2,
chr16 : 75391380 - 75414695 : CFDP1,	3.86134	0	7.51792	0	6.3061	0	0	3.92108	0	0	-0.75524	0.728854	0.999028	chr16	75391380	75414695	-	5	GTAG	TCAGCAGGTGATTAAGAGTTGCCAG	ACATCATCTTCACTATACTCTCCAC	CFDP1,
chr20 : 37066724 - 37068186 : RBL1,	2.89601	0	3.75896	0	5.04488	0	0	0	0	0	-1.03253	0.72953	0.999028	chr20	37066724	37068186	-	5	GTAG	TATTTCAAAACTCTTTGACAGGAAG	CATTTTACTAAAAAATTGTATTAAA	RBL1,
chr6 : 36515338 - 36540204 : STK38,	0	0	0	5.55298	0	0	0	0	4.0077	0	-1.06435	0.730449	0.999028	chr6	36515338	36540204	-	5	GTAG	AGACAACCTTCTTTTGGACAGCAAG	GGTGTTGAGCCTGTCATTGCCATGG	STK38,
chr3 : 170113360 - 170129552 : PHC3,	3.86134	0	0	0	0	0	0	0	9.01731	2.40629	0.973793	0.730903	0.999028	chr3	170113360	170129552	-	5	GTAG	GAGATGGAAGACATGATTGCTGAAG	TGAGGCTGAATTGGAGAATATGAAG	PHC3,
chr3 : 53290791 - 53292827 : DCP1A,	0	7.34056	7.51792	10.1805	3.78366	13.413	0	5.48951	0	6.01573	-0.374199	0.73125	0.999028	chr3	53290791	53292827	-	5	GTAG	TAAGGTGTTATCCAGTGCCATCCCG	GATGCTTGTGTCCAGATGGAGCAGA	DCP1A,
chr12 : 350621 - 356537 : KDM5A,	2.89601	0	2.81922	0	0	8.19681	0	6.27373	0	0	0.774923	0.732189	0.999028	chr12	350621	356537	-	5	GTAG	GAGAAAGATTCTGCCAGAAGAAGAG	TTCTACTCACATCTCCAGATTCTGA	KDM5A,
chr18 : 9221999 - 9182382 : ANKRD12,	216.235	242.238	215.2	192.503	301.432	160.21	185.099	178.801	202.389	223.785	-0.0604404	0.733583	0.999028	chr18	9221999	9182382	+	6	GTAG	TCTGATGATGATGAAAGTTACACAG	TTTTATCAGTCTTCTCATCCTGGAT	ANKRD12,
chr7 : 105102194 - 105101425 : KMT2E,	3.86134	0	0	0	3.78366	7.45165	0	0	0	0	0.960793	0.733975	0.999028	chr7	105102194	105101425	+	6	GTAG	TACCAAGTACCCCAAAACAAAGAAG	CTTCCATTTTTCTTTCTTCTCTTGT	KMT2E,
chr13 : 32517857 - 32527532 : N4BP2L2,	2.89601	5.24326	3.75896	0	0	5.21615	0	0	6.01154	0	-0.648661	0.734688	0.999028	chr13	32517857	32527532	-	5	GTAG	CTCCTCCTCCACAGGGGAGACAGAG	ATCACGATTCTGACCAAGCAGAATT	N4BP2L2,
chr7 : 158918869 - 158879684 : WDR60,	0	0	3.75896	0	0	2.23549	0	8.62637	0	0	0.958883	0.736914	0.999028	chr7	158918869	158879684	+	6	GTAG	AACACCAGTCTACCATTCCTTCAAA	TGTCCTTGCTGTCTCCGTACTGCAG	WDR60,
chrX : 85074391 - 85067127 : APOOL,	0	7.34056	0	0	0	0	4.49269	9.41059	0	3.60944	0.690467	0.737409	0.999028	chrX	85074391	85067127	+	6	GTAG	AAGACCAAATCAGAATCCACTTCAG	TAAGTAATTTTCTTAAACTTGGAAC	APOOL,
chr9 : 19305527 - 19286769 : DENND4C,	0	0	0	6.47848	0	0	0	4.70529	0	0	-1.01858	0.739803	0.999028	chr9	19305527	19286769	+	6	GTAG	ACTTGGATACGAACATGTTATATGT	CCGTTCTTTCCCTTCATATAGAACT	DENND4C,
chr9 : 33953285 - 33996333 : UBAP2,	7.72268	4.19461	2.81922	0	0	0	2.69561	9.41059	3.00577	0	-0.521226	0.739889	0.999028	chr9	33953285	33996333	-	5	GTAG	CAACTCCTGTTCTCCTCAGAGCCTG	GATTTTTCCCTGTCACTTCCATAAG	UBAP2,
chr1 : 155438327 - 155439068 : ASH1L,	0	9.43786	2.81922	7.40397	11.351	3.72582	4.49269	10.979	6.01154	0	0.315632	0.741482	0.999028	chr1	155438327	155439068	-	5	GTAG	AAGAAGAGCAAGAGAATAATAAAAG	GGACTTCGAGAGGGAACTCCGTTTA	ASH1L,
chr3 : 71015549 - 71053773 : FOXP1,	0	3.14595	4.6987	0	0	5.96132	0	0	0	0	-0.945819	0.742132	0.999028	chr3	71015549	71053773	-	5	GTAG	GCGAAGATTTCCAATCATTTCTAAA	TCATCATAGCCACTGACACGGGAAC	FOXP1,
chr6 : 130955105 - 130956499 : EPB41L2,	0	0	0	4.62748	3.78366	5.21615	0	3.13686	0	0	0.805493	0.742844	0.999028	chr6	130955105	130956499	-	5	GTAG	CACCGAATACAGCTGTGACCTGGAG	TCAGTAGTCATGGCCACAGCTTATG	EPB41L2,
chr3 : 71684572 - 71699708 : EIF4E3,	6.75735	0	0	0	0	6.70648	0	5.48951	4.0077	0	0.692865	0.743319	0.999028	chr3	71684572	71699708	-	5	GTAG	CGAAGCCGATGCTGGTCAATTTAGA	TATTATTGTATACACTCCAAAATAT	EIF4E3,
chr1 : 35361789 - 35358925 : ZMYM4,	3.86134	3.14595	3.75896	0	7.56733	1.49033	0	3.92108	4.0077	4.81258	0.41435	0.74385	0.999028	chr1	35361789	35358925	+	6	GTAG	AAAAGATGAACCTGACAATGCTCAA	ATTTCTGTATCCATGATACCACCAC	ZMYM4,
[truncated: 217 more rows]

## Sheet: CD19
TableS1: CircRNAs detected in Sepsis patients (S27,S28,S29,S30,S31,S32) and healthy volunteers (H33,H34,H35,H36).
[truncated: 433 more rows]
